# Supplementary material for: Overdominance at the Gene Expression Level Plays a Critical Role in the Hybrid Root Growth of Brassica napus
Source: MDPI journal article supplement (doi:10.3390/ijms22179246), 2021-08-26
Supplement: s1 [file s1]

a

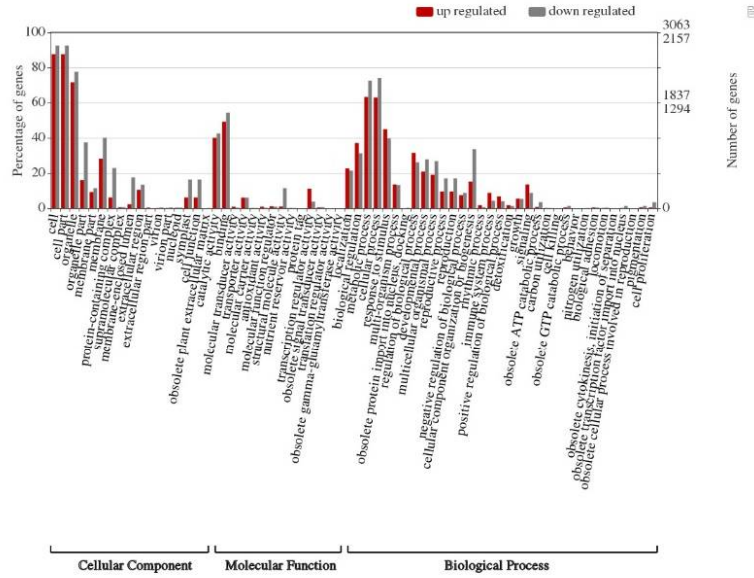

b

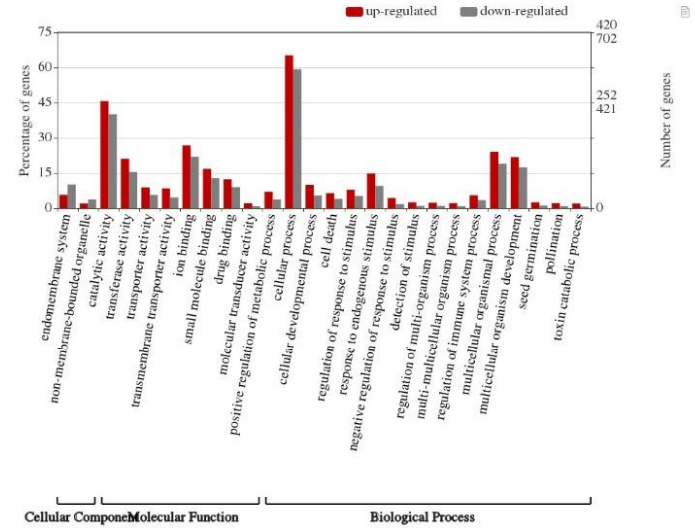

c

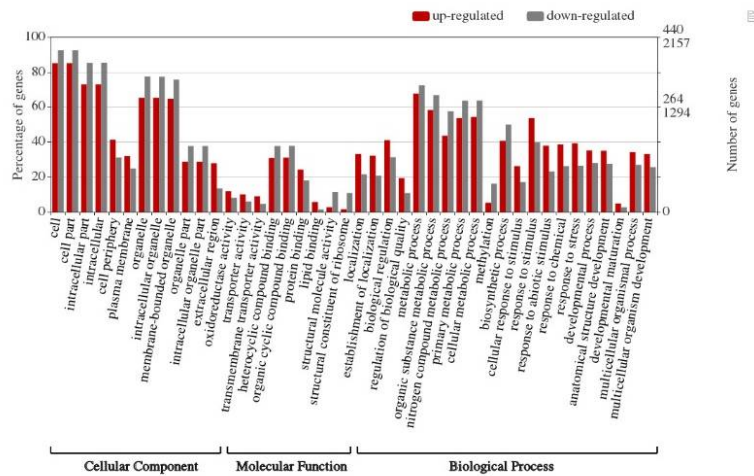

d

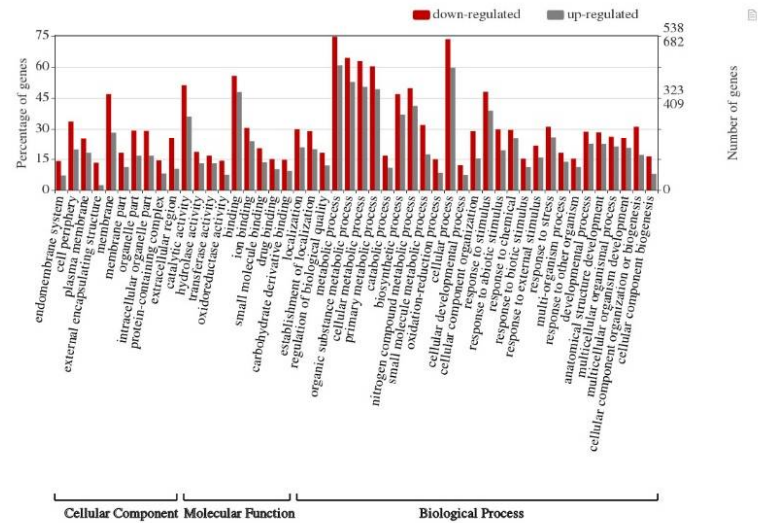

2     **Supplementary Figure S1 Functional annotation of all of the overdominant DEGs in the root of F<sub>1</sub> hybrids based on GO classification.** GO term classification  
3     for DEGs was performed by WEGO software. **(a)** The FO hybrid at 21 days after sowing. **(b)** the FV hybrid at 21 days after sowing. **(c)** The FO hybrid at 24 days after  
4     sowing. **(d)** The FV hybrid at 24 days after sowing. The obtained results are summarized under three top-level ontologies: biological process, molecular function,  
5     and cellular component. The left y-axis indicates the percentage of a specific GO category in that main category. The right y-axis indicates the annotated gene number  
6     expressed in a given sub-category. The down-regulated DEGs are represented by grey, and the up-regulated DEGs are represented by red.
