# Supplementary material for: Overdominance at the Gene Expression Level Plays a Critical Role in the Hybrid Root Growth of Brassica napus
Source: Int J Mol Sci. 2021 Aug 26;22(17):9246. doi: 10.3390/ijms22179246 (PMC8431428; doi:10.3390/ijms22179246)
Supplement: Supplementary file 1 [file ijms-22-09246-s001.zip]

Archive with 15 entries (13 files):
- ijms-1346590-supplementary/
- ijms-1346590-supplementary/Supplementary Materials/
- ijms-1346590-supplementary/Supplementary Materials/Supplementary Figure S1 .pdf
- ijms-1346590-supplementary/Supplementary Materials/Supplementary file 1.xlsx
- ijms-1346590-supplementary/Supplementary Materials/Supplementary file 10.xlsx
- ijms-1346590-supplementary/Supplementary Materials/Supplementary file 11.xlsx
- ijms-1346590-supplementary/Supplementary Materials/Supplementary file 12.xlsx
- ijms-1346590-supplementary/Supplementary Materials/Supplementary file 13.xlsx
- ijms-1346590-supplementary/Supplementary Materials/Supplementary file 14.xlsx
- ijms-1346590-supplementary/Supplementary Materials/Supplementary file 15.xlsx
- ijms-1346590-supplementary/Supplementary Materials/Supplementary file 16.xlsx
- ijms-1346590-supplementary/Supplementary Materials/Supplementary file 17.xlsx
- ijms-1346590-supplementary/Supplementary Materials/Supplementary file 18 .xlsx
- ijms-1346590-supplementary/Supplementary Materials/Supplementary file 19.xlsx
- ijms-1346590-supplementary/Supplementary Materials/Supplementary file 2.xlsx
