# Supplementary material for: Overdominance at the Gene Expression Level Plays a Critical Role in the Hybrid Root Growth of Brassica napus
Source: Int J Mol Sci. 2021 Aug 26;22(17):9246. doi: 10.3390/ijms22179246 (PMC8431428; doi:10.3390/ijms22179246)
Supplement: Supplementary file 1 [file ijms-22-09246-s001.zip › ijms-1346590-supplementary/Supplementary Materials/Supplementary file 1.xlsx]

## Sheet: Sheet1
Supplementary file (2): Brief detail of clean data after RNA sequencing and its quality of 30 samples in root of two contrasting rapeseed hybrid (high and low hybrid) at the seedling stage.
Sample Name	Clean Reads	Clean bases	Read length(bp)	Q20(%)	GC(%)
O_ 21d_1	42743098	6411464700	150	0.975	0.4545
O_ 21d_2	49518314	7427747100	150	0.9758	0.4592
O_ 21d_3	53129166	7969374900	150	0.9768	0.4616
FO_ 21d_1	54869032	8230354800	150	0.9771	0.4522
FO_ 21d_2	53725774	8058866100	150	0.9773	0.4633
FO_ 21d_3	56727934	8509190100	150	0.9777	0.4619
F_ 21d_1	66187698	9928154700	150	0.9777	0.4626
F_ 21d_2	56382536	8457380400	150	0.9755	0.4632
F_ 21d_3	59247866	8887179900	150	0.9759	0.467
FV_ 21d_1	54600202	8190030300	150	0.9794	0.4623
FV_ 21d_2	49027506	7354125900	150	0.9792	0.4586
FV_ 21d_3	47949442	7192416300	150	0.9796	0.4593
V_ 21d_1	52835922	7925388300	150	0.9754	0.4557
V_ 21d_2	50981584	7647237600	150	0.9762	0.4593
V_ 21d_3	53973156	8095973400	150	0.9749	0.4459
O_ 24d_1	52054894	7808234100	150	0.9777	0.4586
O_ 24d_2	53686480	8052972000	150	0.9796	0.4583
O_ 24d_3	56179216	8426882400	150	0.98	0.4606
FO_ 24d_1	41609434	6241415100	150	0.9783	0.4681
FO_ 24d_2	58309634	8746445100	150	0.9772	0.4458
FO_ 24d_3	67344556	10101683400	150	0.9783	0.4488
F_ 24d_1	45606018	6840902700	150	0.9785	0.4691
F_ 24d_2	52079766	7811964900	150	0.9798	0.4686
F_ 24d_2	57852376	8677856400	150	0.9786	0.4577
FV_ 24d_1	40854274	6128141100	150	0.9768	0.453
FV_ 24d_2	47169978	7075496700	150	0.9771	0.4581
FV_ 24d_3	49004632	7350694800	150	0.9801	0.458
V_ 24d_1	55376046	8306406900	150	0.9797	0.4512
V_ 24d_2	50030074	7504511100	150	0.9793	0.4491
V_ 24d_3	57636308	8645446200	150	0.9796	0.4583
Mean				0.977803	0.45833
