# Supplementary material for: Overdominance at the Gene Expression Level Plays a Critical Role in the Hybrid Root Growth of Brassica napus
Source: Int J Mol Sci. 2021 Aug 26;22(17):9246. doi: 10.3390/ijms22179246 (PMC8431428; doi:10.3390/ijms22179246)
Supplement: Supplementary file 1 [file ijms-22-09246-s001.zip › ijms-1346590-supplementary/Supplementary Materials/Supplementary file 10.xlsx]

## Sheet: Go terms for Up regulated
GO_ID	GO_Name	Class	GO_Level	P_value	EnrichmentScore	HitsGenesCountsInSelectedSet	HitsGenesCountsInBackground	AllGenesCountsInSelectedSet	AllGenesCountsInBackground	corrected p-value(BH method)
GO:0001071	nucleic acid binding transcription factor activity	Molecular function	2	0.0020417	1.02211	2476	61452	2854	72400
GO:0003700	transcription factor activity, sequence-specific DNA binding	Molecular function	3	0.0156105	1.00203	2471	63526	2472	63681
GO:0046982	protein heterodimerization activity	Molecular function	5	0.00234563	1.02195	2470	61313	2854	72400
GO:0008756	o-succinylbenzoate-CoA ligase activity	Molecular function	6	0.0358173	1.01899	2195	54645	2854	72400	0.559302
GO:0004096	catalase activity	Molecular function	6	0.0353928	1.01906	2194	54616	2854	72400	0.574779
GO:0046983	protein dimerization activity	Molecular function	4	0.00787521	1.02596	2182	53952	2854	72400	0.35526
GO:0008270	zinc ion binding	Molecular function	7	0.00378494	1.02888	2180	53750	2854	72400	0.192086
GO:0046914	transition metal ion binding	Molecular function	6	0.0217356	1.02735	1733	43455	2472	63681	0.126372
GO:0015294	solute:cation symporter activity	Molecular function	7	0.0281865	1.02905	1604	40154	2472	63681	0.155829
GO:0017153	sodium:dicarboxylate symporter activity	Molecular function	12	0	1.17223	1374	30195	2472	63681	0
GO:0015293	symporter activity	Molecular function	6	0.0144905	1.04749	1258	30466	2854	72400	0.30964
GO:0043565	sequence-specific DNA binding	Molecular function	6	0.0270709	1.04138	1191	29462	2472	63681	0.151146
GO:0015174	basic amino acid transmembrane transporter activity	Molecular function	10	0.00227959	1.06682	1099	26538	2472	63681	0.0218934
GO:0003997	acyl-CoA oxidase activity	Molecular function	6	2.11674e-07	1.12739	1073	24518	2472	63681	8.38943e-06
GO:1902936	phosphatidylinositol bisphosphate binding	Molecular function	8	0.0191131	1.0541	962	23510	2472	63681	0.11769
GO:0050897	cobalt ion binding	Molecular function	7	0	1.31349	950	18632	2472	63681	0
GO:0003978	UDP-glucose 4-epimerase activity	Molecular function	6	2.29674e-11	1.20114	897	19238	2472	63681	3.40159e-09
GO:0003995	acyl-CoA dehydrogenase activity	Molecular function	5	0	1.34193	721	13841	2472	63681	0
GO:0016701	oxidoreductase activity, acting on single donors with incorporation of molecular oxygen	Molecular function	4	0.00142554	1.1017	700	16368	2472	63681	0.0150807
GO:0042803	protein homodimerization activity	Molecular function	5	0	1.44748	690	12280	2472	63681	0
GO:0004842	ubiquitin-protein transferase activity	Molecular function	5	0.000108611	1.13078	682	15537	2472	63681	0.00184115
GO:0019787	ubiquitin-like protein transferase activity	Molecular function	4	7.13798e-05	1.13619	673	15259	2472	63681	0.00128758
GO:0080025	phosphatidylinositol-3,5-bisphosphate binding	Molecular function	9	0.0299418	1.06747	650	15447	2854	72400	0.506515
GO:0015108	chloride transmembrane transporter activity	Molecular function	8	0.0170808	1.07547	640	15330	2472	63681	0.107289
GO:1901981	phosphatidylinositol phosphate binding	Molecular function	7	0.0241542	1.07184	638	15100	2854	72400	0.445754
GO:0005247	voltage-gated chloride channel activity	Molecular function	10	1.7144e-07	1.19653	638	13736	2472	63681	6.99176e-06
GO:0005254	chloride channel activity	Molecular function	9	5.0353e-05	1.14561	635	14279	2472	63681	0.000932193
GO:0005546	phosphatidylinositol-4,5-bisphosphate binding	Molecular function	9	1.33057e-07	1.20264	621	13302	2472	63681	5.58838e-06
GO:0042802	identical protein binding	Molecular function	4	0.0395661	1.06362	602	15159	2213	59271	0.219039
GO:0003825	alpha,alpha-trehalose-phosphate synthase (UDP-forming) activity	Molecular function	8	0.0371281	1.06649	594	14348	2472	63681	0.192056
GO:0005342	organic acid transmembrane transporter activity	Molecular function	5	0.00941417	1.09196	563	13282	2472	63681	0.0665615
GO:0046943	carboxylic acid transmembrane transporter activity	Molecular function	8	0.0425965	1.06656	561	13550	2472	63681	0.208827
GO:0003677	DNA binding	Molecular function	5	2.27904e-06	1.20101	523	11218	2472	63681	6.16655e-05
GO:0005351	sugar:proton symporter activity	Molecular function	9	0.0198442	1.08543	510	12104	2472	63681	0.121131
GO:0005402	cation:sugar symporter activity	Molecular function	8	0.02299	1.08351	503	11959	2472	63681	0.131491
GO:0015295	solute:proton symporter activity	Molecular function	8	4.99685e-11	1.31422	492	9644	2472	63681	6.11353e-09
GO:0015296	anion:cation symporter activity	Molecular function	8	5.15237e-11	1.31395	492	9646	2472	63681	6.04115e-09
GO:0051119	sugar transmembrane transporter activity	Molecular function	6	0.000122655	1.16504	484	10702	2472	63681	0.00203031
GO:0015925	galactosidase activity	Molecular function	6	0	1.44485	481	8576	2472	63681	0
GO:0004805	trehalose-phosphatase activity	Molecular function	8	0.00399226	1.11768	473	10902	2472	63681	0.0331393
GO:0016854	racemase and epimerase activity	Molecular function	4	6.43929e-15	1.40291	469	8612	2472	63681	1.64729e-12
GO:0016810	hydrolase activity, acting on carbon-nitrogen (but not peptide) bonds	Molecular function	4	0.0488788	1.07204	468	11246	2472	63681	0.231948
GO:0005310	dicarboxylic acid transmembrane transporter activity	Molecular function	9	1.74806e-10	1.31465	467	9151	2472	63681	1.82186e-08
GO:0015144	carbohydrate transmembrane transporter activity	Molecular function	5	8.77076e-15	1.4029	466	8557	2472	63681	2.05674e-12
GO:1901476	carbohydrate transporter activity	Molecular function	3	0.0433022	1.07667	449	10743	2472	63681	0.211549
GO:0015291	secondary active transmembrane transporter activity	Molecular function	5	0.00139413	1.13722	448	10551	2213	59271	0.0263598
GO:0016634	oxidoreductase activity, acting on the CH-CH group of donors, oxygen as acceptor	Molecular function	5	2.02205e-10	1.32381	446	8679	2472	63681	2.03216e-08
GO:0050072	m7G(5')pppN diphosphatase activity	Molecular function	7	0.00217815	1.13128	443	10488	2213	59271	0.0387963
GO:0043169	cation binding	Molecular function	4	0.014261	1.10023	442	10349	2472	63681	0.0924666
GO:0046872	metal ion binding	Molecular function	5	0.00415375	1.12328	437	10022	2472	63681	0.0340777
GO:0016491	oxidoreductase activity	Molecular function	3	0.00455137	1.12171	437	10036	2472	63681	0.0368033
GO:0015171	amino acid transmembrane transporter activity	Molecular function	9	0.00558893	1.11815	437	10068	2472	63681	0.0435658
GO:0019203	carbohydrate phosphatase activity	Molecular function	7	0.0180482	1.09724	431	10119	2472	63681	0.111867
GO:0016790	thiolester hydrolase activity	Molecular function	5	0.0195693	1.09561	431	10134	2472	63681	0.119713
GO:0005343	organic acid:sodium symporter activity	Molecular function	11	0.00559979	1.12027	425	9773	2472	63681	0.0435298
GO:0016783	sulfurtransferase activity	Molecular function	5	0.000255087	1.1702	423	9312	2472	63681	0.00366233
GO:0052654	L-leucine transaminase activity	Molecular function	7	0.000191759	1.17488	421	9231	2472	63681	0.00285508
GO:0052655	L-valine transaminase activity	Molecular function	7	0.000191759	1.17488	421	9231	2472	63681	0.00285508
GO:0052656	L-isoleucine transaminase activity	Molecular function	7	0.000218712	1.17298	421	9246	2472	63681	0.0032055
GO:0016857	racemase and epimerase activity, acting on carbohydrates and derivatives	Molecular function	5	0.0052789	1.12359	413	9469	2472	63681	0.0418445
GO:0016688	L-ascorbate peroxidase activity	Molecular function	6	0.00548995	1.12288	413	9475	2472	63681	0.0432737
GO:0015140	malate transmembrane transporter activity	Molecular function	11	0.00120675	1.14954	410	9188	2472	63681	0.0130608
GO:0004575	sucrose alpha-glucosidase activity	Molecular function	8	8.47322e-13	1.40035	409	7524	2472	63681	1.83413e-10
GO:0009881	photoreceptor activity	Molecular function	5	5.58761e-06	1.23668	384	7999	2472	63681	0.00012479
GO:0008483	transaminase activity	Molecular function	5	6.59552e-07	1.27249	368	7450	2472	63681	2.23612e-05
GO:0016769	transferase activity, transferring nitrogenous groups	Molecular function	4	1.9528e-11	1.39856	367	6760	2472	63681	3.23247e-09
GO:0043177	organic acid binding	Molecular function	4	2.96163e-06	1.25654	359	7360	2472	63681	7.50813e-05
GO:0031406	carboxylic acid binding	Molecular function	5	0.000355224	1.18678	351	7619	2472	63681	0.00473744
GO:0015556	C4-dicarboxylate transmembrane transporter activity	Molecular function	10	0.000513893	1.18248	345	7516	2472	63681	0.00654342
GO:0047617	acyl-CoA hydrolase activity	Molecular function	7	0.000513893	1.18248	345	7516	2472	63681	0.00654342
GO:0008081	phosphoric diester hydrolase activity	Molecular function	6	9.97724e-09	1.34163	343	6586	2472	63681	5.97361e-07
GO:0004601	peroxidase activity	Molecular function	5	2.4194e-09	1.36482	336	6342	2472	63681	1.9452e-07
GO:0004565	beta-galactosidase activity	Molecular function	7	0.000447553	1.18876	330	7435	2213	59271	0.014866
GO:0020037	heme binding	Molecular function	5	2.08111e-12	1.45565	328	6035	2213	59271	2.55769e-09
GO:0005253	anion channel activity	Molecular function	8	2.5242e-12	1.45435	327	6022	2213	59271	1.55112e-09
GO:0015370	solute:sodium symporter activity	Molecular function	10	9.74966e-06	1.25455	324	6917	2213	59271	0.00133137
GO:0004084	branched-chain-amino-acid transaminase activity	Molecular function	6	2.62565e-06	1.27773	322	6492	2472	63681	6.84128e-05
GO:0016684	oxidoreductase activity, acting on peroxide as acceptor	Molecular function	4	7.49228e-05	1.22543	320	6727	2472	63681	0.00132599
GO:0016645	oxidoreductase activity, acting on the CH-NH group of donors	Molecular function	4	0.00190026	1.16648	320	7067	2472	63681	0.019235
GO:0004029	aldehyde dehydrogenase (NAD) activity	Molecular function	6	0.000252933	1.20477	319	6821	2472	63681	0.00365002
GO:0016405	CoA-ligase activity	Molecular function	5	0.00105527	1.17834	319	6974	2472	63681	0.0118308
GO:0035251	UDP-glucosyltransferase activity	Molecular function	7	0.00165262	1.17129	314	6906	2472	63681	0.0172239
GO:0016597	amino acid binding	Molecular function	6	7.34913e-11	1.44577	297	5292	2472	63681	7.95402e-09
GO:0005506	iron ion binding	Molecular function	7	0.0154099	1.13004	285	6497	2472	63681	0.0983298
GO:0010427	abscisic acid binding	Molecular function	7	1.60776e-11	1.49386	274	4725	2472	63681	2.82765e-09
GO:0046556	alpha-L-arabinofuranosidase activity	Molecular function	6	1.74302e-05	1.27948	269	5416	2472	63681	0.000352868
GO:0016702	oxidoreductase activity, acting on single donors with incorporation of molecular oxygen, incorporation of two atoms of oxygen	Molecular function	5	4.80658e-07	1.34265	268	5142	2472	63681	1.73407e-05
GO:0004028	3-chloroallyl aldehyde dehydrogenase activity	Molecular function	6	0.00224765	1.18253	265	6002	2213	59271	0.0394623
GO:0019238	cyclohydrolase activity	Molecular function	6	5.2421e-11	1.491	263	4544	2472	63681	5.9005e-09
GO:0016646	oxidoreductase activity, acting on the CH-NH group of donors, NAD or NADP as acceptor	Molecular function	5	2.31648e-11	1.50454	262	4486	2472	63681	3.25929e-09
GO:0015145	monosaccharide transmembrane transporter activity	Molecular function	7	2.9153e-09	1.43086	262	4717	2472	63681	2.27879e-07
GO:0015368	calcium:cation antiporter activity	Molecular function	10	3.60546e-09	1.42753	262	4728	2472	63681	2.47458e-07
GO:0016878	acid-thiol ligase activity	Molecular function	5	0.00234566	1.18753	254	5510	2472	63681	0.0224513
GO:0010294	abscisic acid glucosyltransferase activity	Molecular function	8	3.45953e-05	1.28208	247	4963	2472	63681	0.000666789
GO:0008514	organic anion transmembrane transporter activity	Molecular function	7	4.16545e-06	1.328	241	4675	2472	63681	9.60784e-05
GO:0008308	voltage-gated anion channel activity	Molecular function	9	3.83854e-06	1.33045	240	4647	2472	63681	8.92699e-05
GO:0051213	dioxygenase activity	Molecular function	4	1.98544e-07	1.38606	239	4442	2472	63681	7.98148e-06
GO:0004712	protein serine/threonine/tyrosine kinase activity	Molecular function	7	0.000334863	1.24143	237	4918	2472	63681	0.00453031
GO:0003682	chromatin binding	Molecular function	3	0.021058	1.13877	230	5203	2472	63681	0.12294
GO:0015250	water channel activity	Molecular function	7	0.021058	1.13877	230	5203	2472	63681	0.12294
GO:0005372	water transmembrane transporter activity	Molecular function	5	3.52127e-06	1.34257	229	4394	2472	63681	8.6164e-05
GO:0016811	hydrolase activity, acting on carbon-nitrogen (but not peptide) bonds, in linear amides	Molecular function	5	0.00912971	1.16517	228	4964	2854	72400	0.264762
GO:0090599	alpha-glucosidase activity	Molecular function	7	4.56305e-08	1.43081	224	4033	2472	63681	2.29293e-06
GO:0019840	isoprenoid binding	Molecular function	4	1.48249e-06	1.36583	223	4206	2472	63681	4.25687e-05
GO:0016407	acetyltransferase activity	Molecular function	6	7.41454e-06	1.33402	221	4437	2213	59271	0.00113906
GO:0016624	oxidoreductase activity, acting on the aldehyde or oxo group of donors, disulfide as acceptor	Molecular function	5	1.39449e-05	1.32245	221	4305	2472	63681	0.000292843
GO:0004564	beta-fructofuranosidase activity	Molecular function	6	1.1102e-09	1.52619	207	3494	2472	63681	1.04136e-07
GO:0016877	ligase activity, forming carbon-sulfur bonds	Molecular function	4	1.30539e-09	1.52314	207	3501	2472	63681	1.18496e-07
GO:0016744	transferase activity, transferring aldehyde or ketonic groups	Molecular function	4	6.63606e-05	1.30435	204	4029	2472	63681	0.00120477
GO:0009975	cyclase activity	Molecular function	3	3.21426e-07	1.43157	196	3527	2472	63681	1.17467e-05
GO:0046906	tetrapyrrole binding	Molecular function	4	0.0420794	1.1286	195	4451	2472	63681	0.207013
GO:0022838	substrate-specific channel activity	Molecular function	6	0	1.97825	181	2357	2472	63681	0
GO:0022832	voltage-gated channel activity	Molecular function	7	2.81997e-06	1.40571	181	3317	2472	63681	7.28018e-05
GO:0005244	voltage-gated ion channel activity	Molecular function	8	0.00286021	1.22542	181	3805	2472	63681	0.0255512
GO:0015079	potassium ion transmembrane transporter activity	Molecular function	9	0	1.97651	179	2333	2472	63681	0
GO:0005515	protein binding	Molecular function	3	0.00725453	1.19772	179	3850	2472	63681	0.0538635
GO:0016289	CoA hydrolase activity	Molecular function	6	1.01375e-05	1.38229	176	3280	2472	63681	0.000221138
GO:0022803	passive transmembrane transporter activity	Molecular function	4	2.64403e-08	1.52729	173	2918	2472	63681	1.40383e-06
GO:0015267	channel activity	Molecular function	5	1.48369e-05	1.38446	168	3126	2472	63681	0.000306992
GO:0008324	cation transmembrane transporter activity	Molecular function	6	0.0139005	1.18279	168	3659	2472	63681	0.0920374
GO:0022891	substrate-specific transmembrane transporter activity	Molecular function	4	0.0030437	1.24028	161	3344	2472	63681	0.0268494
GO:0016879	ligase activity, forming carbon-nitrogen bonds	Molecular function	4	9.83785e-06	1.41316	157	2862	2472	63681	0.000216279
GO:0008453	alanine-glyoxylate transaminase activity	Molecular function	6	0.0012022	1.27425	157	3174	2472	63681	0.0130618
GO:0042562	hormone binding	Molecular function	3	0.0039423	1.23533	157	3274	2472	63681	0.0329188
GO:0042579	microbody	Cellular component	6	0.000171576	1.33467	156	3011	2472	63681	0.00260981
GO:0005777	peroxisome	Cellular component	7	0.0178932	1.18361	153	3330	2472	63681	0.111397
GO:0000325	plant-type vacuole	Cellular component	7	0.000353852	1.3184	152	2970	2472	63681	0.00474161
GO:0009705	plant-type vacuole membrane	Cellular component	7	0.0449642	1.14741	149	3478	2213	59271	0.235153
GO:0019005	SCF ubiquitin ligase complex	Cellular component	7	2.09234e-11	1.78043	145	2098	2472	63681	3.27102e-09
GO:0005622	intracellular	Cellular component	3	0.000116292	1.36276	145	2741	2472	63681	0.00193636
	0.138155	BnaA01g17550D,BnaA05g33340D,BnaCnng68050D,BnaA08g11710D,BnaA07g33930D,BnaC07g34880D,BnaC05g22410D,BnaC09g37530D,BnaA02g01030D,BnaA09g27410D,BnaC08g17250D,BnaA03g18900D,BnaA03g42050D,BnaC03g62490D,BnaC05g21780D,BnaA03g56600D,BnaC04g26780D,BnaC05g28200D,BnaC03g57550D,BnaA01g02460D,BnaA03g31890D,BnaA07g29220D,BnaC09g16390D,BnaC04g03760D,BnaA01g13060D,BnaA06g32480D,BnaAnng13370D,BnaA06g24600D,BnaA03g…		0.00640894	1.23037	144	3015	2472	63681	0.0486112
GO:0044424	intracellular part	Cellular component	3	4.37266e-06	1.46299	143	2518	2472	63681	9.92312e-05
	0.136047	BnaC05g22410D,BnaC09g37530D,BnaA02g01030D,BnaA09g27410D,BnaC08g17250D,BnaA03g18900D,BnaA03g42050D,BnaC03g62490D,BnaC05g21780D,BnaA03g56600D,BnaC04g26780D,BnaC05g28200D,BnaC03g57550D,BnaA01g02460D,BnaA03g31890D,BnaA07g29220D,BnaC09g16390D,BnaC04g03760D,BnaA01g13060D,BnaA06g32480D,BnaAnng13370D,BnaA06g24600D,BnaA03g35150D,BnaA07g12040D,BnaC07g32480D,BnaA05g35870D,BnaA01g25780D,BnaA01g21160D,BnaC02g…		0.000721069	1.30925	142	2794	2472	63681	0.00859783
GO:0043231	intracellular membrane-bounded organelle	Cellular component	5	9.24674e-07	1.51663	139	2361	2472	63681	2.8283e-05
GO:0043227	membrane-bounded organelle	Cellular component	3	0.000163643	1.36203	139	2629	2472	63681	0.00255829
GO:0005773	vacuole	Cellular component	6	3.74002e-10	1.73769	137	2031	2472	63681	3.62911e-08
GO:0009654	photosystem II oxygen evolving complex	Cellular component	5	3.08742e-12	1.87052	136	1873	2472	63681	6.20571e-10
GO:0010319	stromule	Cellular component	6	3.08742e-12	1.87052	136	1873	2472	63681	6.20571e-10
GO:0031978	plastid thylakoid lumen	Cellular component	6	0.00390192	1.25984	134	2740	2472	63681	0.0326785
GO:0009543	chloroplast thylakoid lumen	Cellular component	7	0.0411872	1.1615	134	2972	2472	63681	0.203335
GO:0005634	nucleus	Cellular component	6	6.08407e-07	1.54777	132	2197	2472	63681	2.08787e-05
GO:0000151	ubiquitin ligase complex	Cellular component	5	4.68536e-05	1.42137	129	2338	2472	63681	0.000878973
GO:0009507	chloroplast	Cellular component	7	7.98808e-08	1.62034	128	2035	2472	63681	3.56801e-06
GO:0009536	plastid	Cellular component	6	0.00922474	1.23267	128	2675	2472	63681	0.0653864
GO:0043229	intracellular organelle	Cellular component	4	0.000160011	1.39066	124	2297	2472	63681	0.00251548
GO:0043226	organelle	Cellular component	2	0.000177589	1.38704	124	2303	2472	63681	0.00267238
GO:0005881	cytoplasmic microtubule	Cellular component	8	0.000825104	1.33209	124	2398	2472	63681	0.00959439
GO:0009579	thylakoid	Cellular component	4	0.00103184	1.32381	124	2413	2472	63681	0.0116144
GO:0001101	response to acid chemical	Biological process	4	0.00126559	1.31617	124	2427	2472	63681	0.0136451
GO:1901700	response to oxygen-containing compound	Biological process	4	6.44707e-06	1.49946	123	2197	2213	59271	0.00113192
GO:0009414	response to water deprivation	Biological process	6	0.000281373	1.37482	122	2286	2472	63681	0.00395891
GO:0009415	response to water	Biological process	5	7.30899e-07	1.57962	120	1957	2472	63681	2.44851e-05
GO:0042221	response to chemical	Biological process	3	8.71247e-07	1.57399	120	1964	2472	63681	2.7241e-05
GO:0034284	response to monosaccharide	Biological process	6	0.000580329	1.35228	120	2286	2472	63681	0.00722587
GO:0009746	response to hexose	Biological process	7	0.0088305	1.24515	119	2462	2472	63681	0.0630686
GO:0009750	response to fructose	Biological process	8	0.00462339	1.27551	117	2363	2472	63681	0.0372785
GO:0050896	response to stimulus	Biological process	2	3.54591e-05	1.46197	116	2044	2472	63681	0.000674203
GO:0010033	response to organic substance	Biological process	4	0.0138483	1.22873	116	2432	2472	63681	0.0919086
GO:0009719	response to endogenous stimulus	Biological process	3	0.00047575	1.36963	115	2163	2472	63681	0.00619797
GO:0009725	response to hormone	Biological process	5	0.000169802	1.41054	114	2082	2472	63681	0.00259686
GO:0010035	response to inorganic substance	Biological process	4	2.13407e-09	1.80214	112	1601	2472	63681	1.81978e-07
GO:0046395	carboxylic acid catabolic process	Biological process	8	2.13407e-09	1.80214	112	1601	2472	63681	1.81978e-07
GO:0016054	organic acid catabolic process	Biological process	6	1.7236e-05	1.49882	112	1925	2472	63681	0.000351465
GO:0006970	response to osmotic stress	Biological process	4	0.00137361	1.3339	112	2163	2472	63681	0.0145862
GO:0044248	cellular catabolic process	Biological process	4	0.00247332	1.30968	112	2203	2472	63681	0.0235132
GO:0009743	response to carbohydrate	Biological process	5	0.00247332	1.30968	112	2203	2472	63681	0.0235132
GO:0006950	response to stress	Biological process	3	4.98998e-11	1.93076	111	1481	2472	63681	6.38263e-09
GO:0009651	response to salt stress	Biological process	5	8.23153e-07	1.60825	111	1778	2472	63681	2.60264e-05
GO:0009061	anaerobic respiration	Biological process	7	0.0391556	1.18416	110	2393	2472	63681	0.195016
GO:0006972	hyperosmotic response	Biological process	5	4.94356e-06	1.57134	104	1705	2472	63681	0.000111289
GO:0043436	oxoacid metabolic process	Biological process	6	1.55254e-08	1.78438	103	1487	2472	63681	8.56639e-07
GO:0006082	organic acid metabolic process	Biological process	5	7.90999e-05	1.4692	103	1806	2472	63681	0.00138253
GO:0033993	response to lipid	Biological process	5	3.64531e-06	1.59057	102	1652	2472	63681	8.69314e-05
GO:0044712	single-organism catabolic process	Biological process	4	0.0070667	1.28355	100	2007	2472	63681	0.0526076
GO:0019752	carboxylic acid metabolic process	Biological process	7	0.0411408	1.19208	100	2161	2472	63681	0.203463
GO:0009056	catabolic process	Biological process	3	0	2.6566	99	960	2472	63681	0
GO:0009723	response to ethylene	Biological process	6	0	2.70877	98	932	2472	63681	0
GO:0009737	response to abscisic acid	Biological process	6	1.54771e-05	1.55072	98	1628	2472	63681	0.000317902
GO:0097305	response to alcohol	Biological process	5	0.0044207	1.31171	97	1905	2472	63681	0.0358497
GO:0044242	cellular lipid catabolic process	Biological process	6	1.76752e-05	1.55264	96	1656	2213	59271	0.00167099
GO:0071215	cellular response to abscisic acid stimulus	Biological process	7	0.0374844	1.20263	96	2025	2854	72400	0.543523
GO:0097306	cellular response to alcohol	Biological process	6	3.7745e-06	1.6241	94	1491	2472	63681	8.85121e-05
GO:0006811	ion transport	Biological process	5	0.00860822	1.28463	94	1885	2472	63681	0.0619528
GO:0032870	cellular response to hormone stimulus	Biological process	6	2.30309e-06	1.64884	93	1453	2472	63681	6.17228e-05
GO:0046484	oxazole or thiazole metabolic process	Biological process	5	9.33147e-05	1.49548	93	1602	2472	63681	0.00161097
GO:0018131	oxazole or thiazole biosynthetic process	Biological process	6	9.33147e-05	1.49548	93	1602	2472	63681	0.00161097
GO:0052837	thiazole biosynthetic process	Biological process	7	9.16741e-09	1.875	92	1264	2472	63681	5.60807e-07
GO:0052838	thiazole metabolic process	Biological process	6	0.000129327	1.48497	92	1596	2472	63681	0.00212823
GO:0071495	cellular response to endogenous stimulus	Biological process	4	0.000283783	1.45043	92	1634	2472	63681	0.00397297
GO:0051973	positive regulation of telomerase activity	Biological process	10	1.74355e-09	1.94866	91	1203	2472	63681	1.53324e-07
GO:0042538	hyperosmotic salinity response	Biological process	6	0.00885267	1.29091	90	1796	2472	63681	0.0630669
GO:0034285	response to disaccharide	Biological process	6	0	2.84457	89	806	2472	63681	0
GO:0009744	response to sucrose	Biological process	7	3.31856e-06	1.6542	89	1386	2472	63681	8.19161e-05
GO:0016042	lipid catabolic process	Biological process	5	3.61214e-06	1.65063	89	1389	2472	63681	8.76254e-05
GO:0032787	monocarboxylic acid metabolic process	Biological process	8	0.000133118	1.4946	89	1534	2472	63681	0.00216528
GO:0019395	fatty acid oxidation	Biological process	10	0.0429455	1.2072	86	1908	2213	59271	0.225555
GO:0072329	monocarboxylic acid catabolic process	Biological process	9	0.00252164	1.36503	86	1623	2472	63681	0.0238117
GO:0015994	chlorophyll metabolic process	Biological process	7	0.00308588	1.3601	84	1591	2472	63681	0.0271365
GO:0009738	abscisic acid-activated signaling pathway	Biological process	7	0.00399614	1.34656	84	1607	2472	63681	0.0330739
GO:0006635	fatty acid beta-oxidation	Biological process	11	8.15708e-09	1.95265	83	1095	2472	63681	5.21683e-07
GO:0044282	small molecule catabolic process	Biological process	5	8.15708e-09	1.95265	83	1095	2472	63681	5.21683e-07
GO:2000573	positive regulation of DNA biosynthetic process	Biological process	9	1.31228e-08	1.95901	80	1052	2472	63681	7.53623e-07
GO:0051972	regulation of telomerase activity	Biological process	9	0.0145128	1.28642	79	1582	2472	63681	0.093453
GO:0071229	cellular response to acid chemical	Biological process	5	3.68445e-06	1.71446	78	1172	2472	63681	8.71264e-05
GO:0034440	lipid oxidation	Biological process	7	0.000937347	1.44143	78	1394	2472	63681	0.0106789
GO:0006778	porphyrin-containing compound metabolic process	Biological process	6	0.00538313	1.34938	77	1470	2472	63681	0.0425509
GO:0033015	tetrapyrrole catabolic process	Biological process	6	1.7722e-08	1.98554	76	971	2854	72400	7.19515e-06
GO:0051187	cofactor catabolic process	Biological process	5	1.7722e-08	1.98554	76	971	2854	72400	7.19515e-06
GO:0006787	porphyrin-containing compound catabolic process	Biological process	7	0.0027419	1.3905	76	1408	2472	63681	0.0254644
GO:0033013	tetrapyrrole metabolic process	Biological process	5	1.14686e-06	1.79227	75	1078	2472	63681	3.39711e-05
GO:0009991	response to extracellular stimulus	Biological process	4	2.72851e-05	1.63596	75	1181	2472	63681	0.000544541
GO:0006552	leucine catabolic process	Biological process	11	0.000133134	1.55561	75	1242	2472	63681	0.0021531
GO:0046149	pigment catabolic process	Biological process	5	0.000177719	1.54073	75	1254	2472	63681	0.00266011
GO:0034754	cellular hormone metabolic process	Biological process	6	5.44252e-09	2.0631	74	924	2472	63681	3.56168e-07
GO:0044281	small molecule metabolic process	Biological process	4	0.00267824	1.39861	74	1363	2472	63681	0.0251219
GO:0000160	phosphorelay signal transduction system	Biological process	7	0.0146372	1.29769	74	1469	2472	63681	0.0940392
GO:0009628	response to abiotic stimulus	Biological process	3	2.23365e-07	1.89	73	995	2472	63681	8.72983e-06
GO:0009755	hormone-mediated signaling pathway	Biological process	6	3.23328e-05	1.63954	73	1147	2472	63681	0.000627479
GO:0044710	single-organism metabolic process	Biological process	3	0.00159171	1.43559	72	1292	2472	63681	0.0166508
GO:0009062	fatty acid catabolic process	Biological process	10	5.64948e-08	1.97946	71	924	2472	63681	2.74097e-06
GO:0042360	vitamin E metabolic process	Biological process	7	7.25304e-08	1.96669	71	930	2472	63681	3.29194e-06
GO:0010189	vitamin E biosynthetic process	Biological process	8	0.00013804	1.5863	69	1165	2213	59271	0.00652503
GO:0015996	chlorophyll catabolic process	Biological process	8	0.000176335	1.57301	69	1130	2472	63681	0.00266777
GO:0009269	response to desiccation	Biological process	7	0.000131979	1.59479	68	1142	2213	59271	0.00648806
GO:0006520	cellular amino acid metabolic process	Biological process	8	5.17263e-08	2.01814	68	868	2472	63681	2.55365e-06
GO:0002376	immune system process	Biological process	2	4.1586e-05	1.65885	68	1056	2472	63681	0.00078539
GO:0042362	fat-soluble vitamin biosynthetic process	Biological process	7	0.00132971	1.46727	67	1223	2213	59271	0.0281761
GO:0006775	fat-soluble vitamin metabolic process	Biological process	6	1.03153e-08	2.11777	67	815	2472	63681	6.04734e-07
GO:0005984	disaccharide metabolic process	Biological process	7	1.46805e-08	2.11208	66	805	2472	63681	8.26221e-07
GO:0071396	cellular response to lipid	Biological process	6	7.8217e-07	1.89334	66	898	2472	63681	2.55933e-05
GO:1901575	organic substance catabolic process	Biological process	4	0.000237051	1.57977	65	1102	2213	59271	0.00882835
GO:0031668	cellular response to extracellular stimulus	Biological process	5	1.81126e-08	2.11422	65	792	2472	63681	9.80171e-07
GO:0009850	auxin metabolic process	Biological process	6	1.2687e-07	2.00534	65	835	2472	63681	5.40927e-06
GO:0009311	oligosaccharide metabolic process	Biological process	6	0.00784209	1.36468	65	1227	2472	63681	0.0579203
GO:0043574	peroxisomal transport	Biological process	6	0.0108085	1.34652	64	1273	2213	59271	0.0991313
GO:0009081	branched-chain amino acid metabolic process	Biological process	9	0.0161587	1.31896	64	1250	2472	63681	0.101952
GO:0031667	response to nutrient levels	Biological process	5	1.70468e-07	2.01357	63	806	2472	63681	7.05435e-06
GO:0071496	cellular response to external stimulus	Biological process	4	5.34266e-07	1.95973	62	815	2472	63681	1.85608e-05
GO:0042744	hydrogen peroxide catabolic process	Biological process	6	1.56565e-06	1.89689	62	842	2472	63681	4.31934e-05
GO:0010200	response to chitin	Biological process	6	0.000486507	1.55519	62	1027	2472	63681	0.00627996
GO:0009873	ethylene-activated signaling pathway	Biological process	8	0.00827646	1.37215	62	1164	2472	63681	0.0601808
GO:0007031	peroxisome organization	Biological process	5	0.0193469	1.31543	61	1242	2213	59271	0.139867
GO:0030258	lipid modification	Biological process	6	0.036577	1.26747	61	1289	2213	59271	0.209085
GO:0016558	protein import into peroxisome matrix	Biological process	12	0.000329665	1.58569	61	991	2472	63681	0.00450329
GO:0009083	branched-chain amino acid catabolic process	Biological process	10	0.00634404	1.39434	61	1127	2472	63681	0.048249
GO:0048583	regulation of response to stimulus	Biological process	4	0.0071492	1.39013	60	1156	2213	59271	0.0784497
GO:0006625	protein targeting to peroxisome	Biological process	11	4.2128e-06	1.85999	60	831	2472	63681	9.63807e-05
GO:0072663	establishment of protein localization to peroxisome	Biological process	8	0.00871925	1.37636	60	1123	2472	63681	0.0625917
GO:0072662	protein localization to peroxisome	Biological process	7	3.14648e-05	1.74701	59	870	2472	63681	0.000619174
GO:0009063	cellular amino acid catabolic process	Biological process	9	3.14648e-05	1.74701	59	870	2472	63681	0.000619174
GO:0006551	leucine metabolic process	Biological process	10	0.00414073	1.43251	59	1061	2472	63681	0.0340702
GO:0007154	cell communication	Biological process	3	0.0043062	1.42982	59	1063	2472	63681	0.0352257
GO:0019439	aromatic compound catabolic process	Biological process	5	7.57952e-07	1.98953	58	751	2472	63681	2.50927e-05
GO:0071369	cellular response to ethylene stimulus	Biological process	7	2.3834e-06	1.91801	58	779	2472	63681	6.32724e-05
GO:0009646	response to absence of light	Biological process	7	0.00158249	1.50315	58	994	2472	63681	0.0166161
GO:0055114	oxidation-reduction process	Biological process	4	0.00371021	1.445	58	1034	2472	63681	0.031353
GO:0006820	anion transport	Biological process	6	0.000159947	1.66969	56	864	2472	63681	0.0025286
GO:0010286	heat acclimation	Biological process	6	0.00319276	1.46607	56	984	2472	63681	0.0278155
GO:0070887	cellular response to chemical stimulus	Biological process	4	0.000427602	1.61189	55	879	2472	63681	0.00562277
GO:0042372	phylloquinone biosynthetic process	Biological process	8	0.00184992	1.5105	55	938	2472	63681	0.0189988
GO:0042374	phylloquinone metabolic process	Biological process	7	0.036838	1.28454	55	1103	2472	63681	0.190907
GO:0044270	cellular nitrogen compound catabolic process	Biological process	5	1.98553e-05	1.84007	53	742	2472	63681	0.000399092
GO:0006812	cation transport	Biological process	6	0.000142696	1.70453	53	801	2472	63681	0.00229455
GO:0046700	heterocycle catabolic process	Biological process	5	0.000142696	1.70453	53	801	2472	63681	0.00229455
GO:0009970	cellular response to sulfate starvation	Biological process	8	0.0106938	1.39177	53	981	2472	63681	0.0730399
GO:0042594	response to starvation	Biological process	6	0.0225877	1.33203	53	1025	2472	63681	0.129718
GO:0032879	regulation of localization	Biological process	4	0.0244357	1.32556	53	1030	2472	63681	0.138913
GO:1901361	organic cyclic compound catabolic process	Biological process	5	0.0244357	1.32556	53	1030	2472	63681	0.138913
GO:0045087	innate immune response	Biological process	5	0.0244357	1.32556	53	1030	2472	63681	0.138913
GO:0006955	immune response	Biological process	3	0.000325864	1.65583	52	809	2472	63681	0.00447307
GO:1901606	alpha-amino acid catabolic process	Biological process	10	0.00166552	1.53797	52	871	2472	63681	0.0172944
GO:0010243	response to organonitrogen compound	Biological process	5	0.0475659	1.27214	52	1053	2472	63681	0.226481
GO:0031669	cellular response to nutrient levels	Biological process	6	1.01664e-06	2.07552	51	633	2472	63681	3.07615e-05
GO:0006952	defense response	Biological process	4	0.00511483	1.45979	51	900	2472	63681	0.0410061
GO:2000278	regulation of DNA biosynthetic process	Biological process	8	4.797e-05	1.81415	50	710	2472	63681	0.000893957
GO:0008219	cell death	Biological process	4	0.0218342	1.34733	50	956	2472	63681	0.126684
GO:0080134	regulation of response to stress	Biological process	5	0.0300656	1.31972	50	976	2472	63681	0.165243
GO:1901616	organic hydroxy compound catabolic process	Biological process	5	0.0300656	1.31972	50	976	2472	63681	0.165243
GO:0006914	autophagy	Biological process	5	0.0148732	1.39002	48	876	2854	72400	0.301926
GO:0043617	cellular response to sucrose starvation	Biological process	8	0.00519817	1.47733	48	837	2472	63681	0.0414381
GO:0009684	indoleacetic acid biosynthetic process	Biological process	10	5.2686e-05	1.84568	47	656	2472	63681	0.00096901
GO:1901698	response to nitrogen compound	Biological process	4	0.00225398	1.55226	47	780	2472	63681	0.0217216
GO:0009683	indoleacetic acid metabolic process	Biological process	9	0.00261026	1.54041	47	786	2472	63681	0.0245661
GO:0031347	regulation of defense response	Biological process	6	0.0095768	1.43286	47	845	2472	63681	0.0668712
GO:0009267	cellular response to starvation	Biological process	7	0.049755	1.28531	47	942	2472	63681	0.235312
GO:0009611	response to wounding	Biological process	4	0.00314571	1.53299	46	773	2472	63681	0.0275764
GO:0044255	cellular lipid metabolic process	Biological process	5	0.00804481	1.45399	46	815	2472	63681	0.0589534
GO:0016036	cellular response to phosphate starvation	Biological process	8	0.0191751	1.37791	46	860	2472	63681	0.117814
GO:0009308	amine metabolic process	Biological process	5	1.0675e-06	2.18725	45	530	2472	63681	3.19568e-05
GO:0032880	regulation of protein localization	Biological process	5	1.2613e-05	1.98841	45	583	2472	63681	0.000266865
GO:0042044	fluid transport	Biological process	6	1.43224e-05	1.97823	45	586	2472	63681	0.000298543
GO:0006833	water transport	Biological process	7	0.00193976	1.5815	45	733	2472	63681	0.0194946
GO:0009072	aromatic amino acid family metabolic process	Biological process	9	0.0438525	1.30545	45	888	2472	63681	0.213866
GO:1901701	cellular response to oxygen-containing compound	Biological process	5	0.0438525	1.30545	45	888	2472	63681	0.213866
GO:0009110	vitamin biosynthetic process	Biological process	6	1.75865e-07	2.36164	44	499	2213	59271	7.2046e-05
GO:0006631	fatty acid metabolic process	Biological process	9	0.000830026	1.66199	44	682	2472	63681	0.0096119
GO:0055082	cellular chemical homeostasis	Biological process	6	0.000830026	1.66199	44	682	2472	63681	0.0096119
GO:0010941	regulation of cell death	Biological process	5	0.0184369	1.39248	44	814	2472	63681	0.114025
GO:0009735	response to cytokinin	Biological process	6	0.000228514	1.78239	43	612	2854	72400	0.0309256
GO:0051716	cellular response to stimulus	Biological process	3	0.00098224	1.66969	42	648	2472	63681	0.0111453
GO:0009851	auxin biosynthetic process	Biological process	7	0.00098224	1.66969	42	648	2472	63681	0.0111453
GO:0046164	alcohol catabolic process	Biological process	6	0.00204776	1.60528	42	674	2472	63681	0.0203618
GO:0051186	cofactor metabolic process	Biological process	4	0.010883	1.45425	42	744	2472	63681	0.0737945
GO:0006810	transport	Biological process	4	0.00315524	1.57641	41	670	2472	63681	0.027574
GO:0090693	plant organ senescence	Biological process	5	0.00558132	1.52409	41	693	2472	63681	0.0436273
GO:0010150	leaf senescence	Biological process	6	0.0245931	1.38246	41	764	2472	63681	0.138966
GO:0071310	cellular response to organic substance	Biological process	5	1.07583e-05	2.10064	40	510	2213	59271	0.0013222
GO:0044275	cellular carbohydrate catabolic process	Biological process	6	1.68191e-05	2.06024	40	520	2213	59271	0.00172256
GO:0015711	organic anion transport	Biological process	7	2.84386e-06	2.22077	40	464	2472	63681	7.27511e-05
GO:0009074	aromatic amino acid family catabolic process	Biological process	10	0.000433842	1.76747	40	583	2472	63681	0.00567829
GO:0046942	carboxylic acid transport	Biological process	8	0.00672172	1.51535	40	680	2472	63681	0.0504397
GO:0015849	organic acid transport	Biological process	6	0.00688097	1.51312	40	681	2472	63681	0.0513609
GO:0006821	chloride transport	Biological process	8	7.12304e-05	1.94877	39	536	2213	59271	0.00397919
GO:0051234	establishment of localization	Biological process	3	0.000165152	1.8709	39	537	2472	63681	0.00256761
GO:0006661	phosphatidylinositol biosynthetic process	Biological process	9	0.000330755	1.80697	39	556	2472	63681	0.00449635
GO:0051347	positive regulation of transferase activity	Biological process	6	0.00238892	1.62306	39	619	2472	63681	0.0227878
GO:1901605	alpha-amino acid metabolic process	Biological process	9	7.88408e-07	2.3993	38	408	2472	63681	2.55009e-05
GO:0009605	response to external stimulus	Biological process	3	8.88479e-07	2.3876	38	410	2472	63681	2.74745e-05
GO:0051188	cofactor biosynthetic process	Biological process	5	0.000728464	1.74806	38	560	2472	63681	0.00864936
GO:0010029	regulation of seed germination	Biological process	8	0.00196064	1.65357	38	592	2472	63681	0.0196343
GO:0042440	pigment metabolic process	Biological process	4	0.0121586	1.47427	38	664	2472	63681	0.0818526
GO:0070838	divalent metal ion transport	Biological process	8	1.36558e-06	2.37694	37	401	2472	63681	4.00285e-05
GO:0048511	rhythmic process	Biological process	2	1.53607e-06	2.36515	37	403	2472	63681	4.36616e-05
GO:0007623	circadian rhythm	Biological process	3	1.53607e-06	2.36515	37	403	2472	63681	4.36616e-05
GO:0042593	glucose homeostasis	Biological process	7	1.53607e-06	2.36515	37	403	2472	63681	4.36616e-05
GO:0007568	aging	Biological process	4	7.95031e-05	1.99869	36	464	2472	63681	0.001381
GO:0009626	plant-type hypersensitive response	Biological process	7	7.24558e-05	2.0307	35	444	2472	63681	0.00129867
GO:0012501	programmed cell death	Biological process	5	7.24558e-05	2.0307	35	444	2472	63681	0.00129867
GO:0044743	protein transmembrane import into intracellular organelle	Biological process	11	0.00684086	1.56262	35	577	2472	63681	0.0511973
GO:0046218	indolalkylamine catabolic process	Biological process	9	0.00878634	1.536	35	587	2472	63681	0.0629128
GO:0006569	tryptophan catabolic process	Biological process	11	0.0166892	1.47589	34	617	2213	59271	0.128194
GO:0010363	regulation of plant-type hypersensitive response	Biological process	8	0.0185465	1.46403	34	622	2213	59271	0.138986
GO:0030001	metal ion transport	Biological process	7	0.000481615	1.85566	34	472	2472	63681	0.00624546
GO:0010167	response to nitrate	Biological process	5	0.00209549	1.70072	34	515	2472	63681	0.0207631
GO:0034050	host programmed cell death induced by symbiont	Biological process	6	0.00209549	1.70072	34	515	2472	63681	0.0207631
GO:0072511	divalent inorganic cation transport	Biological process	7	0.00130745	1.76768	33	500	2213	59271	0.0286938
GO:0006355	regulation of transcription, DNA-templated	Biological process	10	0.00130745	1.76768	33	500	2213	59271	0.0286938
GO:1903506	regulation of nucleic acid-templated transcription	Biological process	9	0.000165303	1.99089	33	427	2472	63681	0.00255584
GO:0051054	positive regulation of DNA metabolic process	Biological process	8	0.000165303	1.99089	33	427	2472	63681	0.00255584
GO:2001141	regulation of RNA biosynthetic process	Biological process	8	0.00565985	1.60701	33	529	2472	63681	0.0438755
GO:0010044	response to aluminum ion	Biological process	6	0.0490007	1.358	33	626	2472	63681	0.232135
GO:0010155	regulation of proton transport	Biological process	7	0.00069963	1.85511	32	462	2213	59271	0.0186923
GO:0006629	lipid metabolic process	Biological process	4	0.000281579	1.95608	32	415	2854	72400	0.0285803
GO:0051252	regulation of RNA metabolic process	Biological process	7	0.000115119	2.05573	32	401	2472	63681	0.00193979
GO:0030641	regulation of cellular pH	Biological process	10	0.0203497	1.47205	32	560	2472	63681	0.12368
GO:0051453	regulation of intracellular pH	Biological process	11	0.0106034	1.56067	31	532	2213	59271	0.098724
GO:1900140	regulation of seedling development	Biological process	7	0.000130112	2.06888	31	386	2472	63681	0.00212869
GO:0043067	regulation of programmed cell death	Biological process	6	0.000277441	1.98161	31	403	2472	63681	0.00392321
GO:0042445	hormone metabolic process	Biological process	5	0.0308202	1.43116	31	558	2472	63681	0.168404
GO:0055062	phosphate ion homeostasis	Biological process	9	0.0308202	1.43116	31	558	2472	63681	0.168404
GO:0055083	monovalent inorganic anion homeostasis	Biological process	8	0.0308202	1.43116	31	558	2472	63681	0.168404
GO:0072506	trivalent inorganic anion homeostasis	Biological process	8	0.0308202	1.43116	31	558	2472	63681	0.168404
GO:0043269	regulation of ion transport	Biological process	6	0.0308202	1.43116	31	558	2472	63681	0.168404
GO:0006873	cellular ion homeostasis	Biological process	7	0.0308202	1.43116	31	558	2472	63681	0.168404
GO:0065002	intracellular protein transmembrane transport	Biological process	10	1.21399e-05	2.38527	30	324	2472	63681	0.000260777
GO:0009266	response to temperature stimulus	Biological process	4	0.00215445	1.76445	30	438	2472	63681	0.0211241
GO:0009410	response to xenobiotic stimulus	Biological process	4	0.00215445	1.76445	30	438	2472	63681	0.0211241
GO:0009814	defense response, incompatible interaction	Biological process	7	0.000431424	1.9814	29	392	2213	59271	0.0151491
GO:0009607	response to biotic stimulus	Biological process	3	0.000431424	1.9814	29	392	2213	59271	0.0151491
GO:0009313	oligosaccharide catabolic process	Biological process	7	0.00055033	1.95153	29	398	2213	59271	0.0153717
GO:0006541	glutamine metabolic process	Biological process	11	5.70841e-08	3.15218	29	237	2472	63681	2.72262e-06
GO:0009739	response to gibberellin	Biological process	6	5.70841e-08	3.15218	29	237	2472	63681	2.72262e-06
GO:0071806	protein transmembrane transport	Biological process	9	5.70841e-08	3.15218	29	237	2472	63681	2.72262e-06
GO:0080135	regulation of cellular response to stress	Biological process	6	0.000525493	1.98393	28	378	2213	59271	0.0153769
GO:0042436	indole-containing compound catabolic process	Biological process	6	0.000525493	1.98393	28	378	2213	59271	0.0153769
GO:0007030	Golgi organization	Biological process	5	9.73987e-08	3.14981	28	229	2472	63681	4.21661e-06
GO:0009228	thiamine biosynthetic process	Biological process	9	0.000236493	2.0847	28	346	2472	63681	0.00343036
GO:0042724	thiamine-containing compound biosynthetic process	Biological process	8	0.00340913	1.7465	28	413	2472	63681	0.0294273
GO:0043207	response to external biotic stimulus	Biological process	4	0.00672494	1.67783	27	431	2213	59271	0.0772425
GO:0051707	response to other organism	Biological process	5	0.00823426	1.65101	27	438	2213	59271	0.0809593
GO:0009733	response to auxin	Biological process	6	2.62141e-07	3.07763	27	226	2472	63681	9.83554e-06
GO:0009800	cinnamic acid biosynthetic process	Biological process	10	0.000353776	2.06393	27	337	2472	63681	0.00476329
GO:0009753	response to jasmonic acid	Biological process	6	0.0199624	1.53204	27	454	2472	63681	0.121589
GO:0015995	chlorophyll biosynthetic process	Biological process	8	0.037497	1.45682	26	478	2213	59271	0.211394
GO:0030320	cellular monovalent inorganic anion homeostasis	Biological process	9	0.0416231	1.44174	26	483	2213	59271	0.22837
GO:0030643	cellular phosphate ion homeostasis	Biological process	10	0.0416231	1.44174	26	483	2213	59271	0.22837
GO:0072501	cellular divalent inorganic anion homeostasis	Biological process	9	3.11314e-07	3.12983	26	214	2472	63681	1.15268e-05
GO:0072502	cellular trivalent inorganic anion homeostasis	Biological process	9	0.0174329	1.56492	26	428	2472	63681	0.108772
GO:0045088	regulation of innate immune response	Biological process	7	0.0307305	1.48511	26	451	2472	63681	0.168241
GO:0045730	respiratory burst	Biological process	4	0.0428601	1.4373	26	466	2472	63681	0.209754
GO:0002679	respiratory burst involved in defense response	Biological process	5	0.00807398	1.69035	25	381	2472	63681	0.0590135
GO:0009583	detection of light stimulus	Biological process	6	2.9969e-05	2.55077	24	252	2213	59271	0.00216658
GO:0006865	amino acid transport	Biological process	9	3.08249e-05	2.54429	24	243	2472	63681	0.000610853
GO:0009310	amine catabolic process	Biological process	6	0.00104632	2.04655	23	301	2213	59271	0.0242627
GO:0042402	cellular biogenic amine catabolic process	Biological process	8	0.00593927	1.80745	22	326	2213	59271	0.0715624
GO:0050776	regulation of immune response	Biological process	5	0.00593927	1.80745	22	326	2213	59271	0.0715624
GO:1902578	single-organism localization	Biological process	3	3.52992e-05	2.64832	22	214	2472	63681	0.000675728
GO:0046345	abscisic acid catabolic process	Biological process	10	0.0203918	1.61006	22	352	2472	63681	0.119298
GO:0042723	thiamine-containing compound metabolic process	Biological process	7	0.00239753	1.98744	21	283	2213	59271	0.041501
GO:0043290	apocarotenoid catabolic process	Biological process	8	1.18856e-05	2.92421	21	185	2472	63681	0.000257276
GO:0006772	thiamine metabolic process	Biological process	8	0.0013028	2.08872	21	259	2472	63681	0.0139395
GO:0016107	sesquiterpenoid catabolic process	Biological process	9	0.0301377	1.5848	20	338	2213	59271	0.191913
GO:0033500	carbohydrate homeostasis	Biological process	6	0.0451145	1.51317	20	354	2213	59271	0.23494
GO:0072505	divalent inorganic anion homeostasis	Biological process	8	2.45847e-06	3.34557	20	154	2472	63681	6.46555e-05
GO:0072330	monocarboxylic acid biosynthetic process	Biological process	9	0.00170142	2.0859	20	247	2472	63681	0.0176022
GO:0007165	signal transduction	Biological process	5	0.00295047	1.98926	20	259	2472	63681	0.0262741
GO:0002682	regulation of immune system process	Biological process	4	0.00295047	1.98926	20	259	2472	63681	0.0262741
GO:0030002	cellular anion homeostasis	Biological process	8	0.00585207	1.90591	19	267	2213	59271	0.0719219
GO:0009064	glutamine family amino acid metabolic process	Biological process	10	0.00585207	1.90591	19	267	2213	59271	0.0719219
GO:0010236	plastoquinone biosynthetic process	Biological process	8	8.05156e-07	3.73632	19	131	2472	63681	2.57467e-05
GO:0006612	protein targeting to membrane	Biological process	11	0.00149823	2.1562	19	227	2472	63681	0.0157903
GO:0051179	localization	Biological process	2	0.0330199	1.58915	19	308	2472	63681	0.175648
GO:0043562	cellular response to nitrogen levels	Biological process	7	6.30876e-05	2.86962	18	168	2213	59271	0.00369212
GO:0051049	regulation of transport	Biological process	5	0.00664017	1.9207	18	251	2213	59271	0.0769884
GO:0015672	monovalent inorganic cation transport	Biological process	7	0.00999909	1.84122	18	248	2854	72400	0.253727
GO:0044765	single-organism transport	Biological process	5	5.92853e-05	2.8801	18	161	2472	63681	0.0010833
GO:0042430	indole-containing compound metabolic process	Biological process	5	7.54778e-05	2.82742	18	164	2472	63681	0.00132747
GO:0009690	cytokinin metabolic process	Biological process	7	0.0232034	1.68006	18	276	2472	63681	0.132443
GO:0030003	cellular cation homeostasis	Biological process	8	0.0232034	1.68006	18	276	2472	63681	0.132443
GO:1901661	quinone metabolic process	Biological process	6	0.0384767	1.58258	18	293	2472	63681	0.196147
GO:1901663	quinone biosynthetic process	Biological process	7	0.03956	1.5772	18	294	2472	63681	0.196682
GO:0042181	ketone biosynthetic process	Biological process	6	0.00439336	2.04643	17	214	2472	63681	0.0358346
GO:0033554	cellular response to stress	Biological process	4	0.00603368	1.98161	17	221	2472	63681	0.046138
GO:0005991	trehalose metabolic process	Biological process	8	0.00630402	1.97268	17	222	2472	63681	0.0480745
GO:0042435	indole-containing compound biosynthetic process	Biological process	6	0.00848285	1.91238	17	229	2472	63681	0.061207
GO:0046488	phosphatidylinositol metabolic process	Biological process	8	0.00920516	1.89583	17	231	2472	63681	0.0654124
GO:0009803	cinnamic acid metabolic process	Biological process	9	0.00997571	1.87955	17	233	2472	63681	0.0686348
GO:0009962	regulation of flavonoid biosynthetic process	Biological process	6	0.0126873	1.87044	16	217	2854	72400	0.303002
GO:0006568	tryptophan metabolic process	Biological process	10	0.0126873	1.87044	16	217	2854	72400	0.303002
GO:0006586	indolalkylamine metabolic process	Biological process	8	0.00185502	2.28986	16	180	2472	63681	0.0189819
GO:0019058	viral life cycle	Biological process	6	0.00185502	2.28986	16	180	2472	63681	0.0189819
GO:0042631	cellular response to water deprivation	Biological process	7	0.00185502	2.28986	16	180	2472	63681	0.0189819
GO:0071462	cellular response to water stimulus	Biological process	6	0.0188618	1.82612	15	220	2213	59271	0.140492
GO:0009585	red, far-red light phototransduction	Biological process	8	3.55669e-11	8.98637	15	43	2472	63681	4.76596e-09
GO:0007602	phototransduction	Biological process	7	0.00514313	2.12315	15	182	2472	63681	0.0411158
GO:0044093	positive regulation of molecular function	Biological process	4	0.00104447	2.60391	14	144	2213	59271	0.0246856
GO:0065007	biological regulation	Biological process	2	0.0352777	1.72002	14	218	2213	59271	0.204511
GO:0098542	defense response to other organism	Biological process	6	0.0388629	1.69667	14	221	2213	59271	0.21612
GO:0000023	maltose metabolic process	Biological process	8	3.6329e-06	4.34522	14	83	2472	63681	8.73759e-05
GO:0090150	establishment of protein localization to membrane	Biological process	7	0.00011577	3.22012	14	112	2472	63681	0.00193915
GO:0072657	protein localization to membrane	Biological process	6	0.010915	2.00363	14	180	2472	63681	0.0736569
GO:0048878	chemical homeostasis	Biological process	5	0.0462085	1.65437	14	218	2472	63681	0.220391
GO:0080167	response to karrikin	Biological process	4	0.0106982	2.0725	13	168	2213	59271	0.0988577
GO:0050801	ion homeostasis	Biological process	6	0.000863353	2.77128	13	119	2854	72400	0.0701043
GO:0001678	cellular glucose homeostasis	Biological process	8	0.00652325	2.20324	13	152	2472	63681	0.0493452
GO:0071333	cellular response to glucose stimulus	Biological process	9	0.0143828	1.9934	13	168	2472	63681	0.0930419
GO:0042446	hormone biosynthetic process	Biological process	6	0.0143828	1.9934	13	168	2472	63681	0.0930419
GO:0006012	galactose metabolic process	Biological process	8	0.0313659	1.79087	13	187	2472	63681	0.167166
GO:0030308	negative regulation of cell growth	Biological process	7	0.0362768	1.75336	13	191	2472	63681	0.188345
GO:0006605	protein targeting	Biological process	10	0.000724722	2.9759	12	108	2213	59271	0.0189507
GO:0000303	response to superoxide	Biological process	7	0.00312814	2.51092	12	128	2213	59271	0.0486644
GO:0000305	response to oxygen radical	Biological process	6	0.00333433	2.49145	12	129	2213	59271	0.0512237
GO:0030004	cellular monovalent inorganic cation homeostasis	Biological process	9	0.000421274	3.1544	12	98	2472	63681	0.00556557
GO:0035556	intracellular signal transduction	Biological process	6	0.00482833	2.37793	12	130	2472	63681	0.0388198
GO:0019725	cellular homeostasis	Biological process	5	0.00814412	2.22396	12	139	2472	63681	0.0593719
GO:0043085	positive regulation of catalytic activity	Biological process	5	0.0340366	1.81842	12	170	2472	63681	0.180715
GO:0071365	cellular response to auxin stimulus	Biological process	7	0.0425582	1.75643	12	176	2472	63681	0.209003
GO:0071214	cellular response to abiotic stimulus	Biological process	4	1.97256e-05	4.67641	11	63	2213	59271	0.00173163
GO:0006835	dicarboxylic acid transport	Biological process	9	2.30194e-05	4.60335	11	64	2213	59271	0.00176818
GO:0019400	alditol metabolic process	Biological process	7	0.00014941	3.7771	11	78	2213	59271	0.00633191
GO:0006766	vitamin metabolic process	Biological process	5	0.00418213	2.53978	11	116	2213	59271	0.0552671
GO:0071423	malate transmembrane transport	Biological process	12	0.0204756	2.03182	11	145	2213	59271	0.14546
GO:0043069	negative regulation of programmed cell death	Biological process	7	0.0204756	2.03182	11	145	2213	59271	0.14546
GO:0071326	cellular response to monosaccharide stimulus	Biological process	7	0.0224024	2.00418	11	147	2213	59271	0.156435
GO:0071331	cellular response to hexose stimulus	Biological process	8	0.0382685	1.84134	11	160	2213	59271	0.214758
GO:0009891	positive regulation of biosynthetic process	Biological process	6	0.0382685	1.84134	11	160	2213	59271	0.214758
GO:0009409	response to cold	Biological process	5	0.000882938	3.08011	11	92	2472	63681	0.0101
GO:0009861	jasmonic acid and ethylene-dependent systemic resistance	Biological process	8	0.00190316	2.80565	11	101	2472	63681	0.0191953
GO:0009889	regulation of biosynthetic process	Biological process	5	0.00279395	2.6733	11	106	2472	63681	0.0258625
GO:0008654	phospholipid biosynthetic process	Biological process	7	0.00323299	2.6238	11	108	2472	63681	0.0280791
GO:0005982	starch metabolic process	Biological process	8	0.00323299	2.6238	11	108	2472	63681	0.0280791
GO:0006351	transcription, DNA-templated	Biological process	10	0.0101724	2.24897	11	126	2472	63681	0.0698175
GO:0060548	negative regulation of cell death	Biological process	6	0.0164099	2.09904	11	135	2472	63681	0.103305
GO:0006814	sodium ion transport	Biological process	8	0.0093032	2.39135	10	112	2213	59271	0.0893252
GO:0006644	phospholipid metabolic process	Biological process	6	0.0104717	2.34939	10	114	2213	59271	0.0982425
GO:0097659	nucleic acid-templated transcription	Biological process	9	0.0124293	2.28915	10	117	2213	59271	0.108338
GO:0010817	regulation of hormone levels	Biological process	4	0.0154525	2.21348	10	121	2213	59271	0.120197
GO:0046174	polyol catabolic process	Biological process	7	2.22257e-06	6.44023	10	40	2472	63681	6.07216e-05
GO:0044106	cellular amine metabolic process	Biological process	6	0.000148788	4.08904	10	63	2472	63681	0.00236547
GO:0046351	disaccharide biosynthetic process	Biological process	8	0.000283985	3.78837	10	68	2472	63681	0.00395611
GO:0009694	jasmonic acid metabolic process	Biological process	9	0.000283985	3.78837	10	68	2472	63681	0.00395611
GO:0071897	DNA biosynthetic process	Biological process	8	0.000283985	3.78837	10	68	2472	63681	0.00395611
GO:0044700	single organism signaling	Biological process	3	0.00116429	3.18036	10	81	2472	63681	0.0127483
GO:0015698	inorganic anion transport	Biological process	7	0.00116429	3.18036	10	81	2472	63681	0.0127483
GO:0023052	signaling	Biological process	2	0.00219243	2.92738	10	88	2472	63681	0.0212741
GO:0080024	indolebutyric acid metabolic process	Biological process	8	0.00219243	2.92738	10	88	2472	63681	0.0212741
GO:0009695	jasmonic acid biosynthetic process	Biological process	10	0.0106429	2.3419	10	110	2472	63681	0.0728689
GO:0032774	RNA biosynthetic process	Biological process	8	0.0486842	1.82702	10	141	2472	63681	0.231414
GO:0019219	regulation of nucleobase-containing compound metabolic process	Biological process	6	7.05298e-07	8.312	9	29	2213	59271	0.000173362
GO:0019751	polyol metabolic process	Biological process	6	0.000672548	3.70843	9	65	2213	59271	0.018368
GO:0015749	monosaccharide transport	Biological process	7	0.000753244	3.65224	9	66	2213	59271	0.0192862
GO:0010017	red or far-red light signaling pathway	Biological process	8	0.00115863	3.44354	9	70	2213	59271	0.0258902
GO:0046685	response to arsenic-containing substance	Biological process	4	0.00697676	2.64888	9	91	2213	59271	0.0772472
GO:0015706	nitrate transport	Biological process	8	2.29073e-07	9.27393	9	25	2472	63681	8.83028e-06
GO:0009893	positive regulation of metabolic process	Biological process	5	2.29073e-07	9.27393	9	25	2472	63681	8.83028e-06
GO:0009582	detection of abiotic stimulus	Biological process	4	4.89779e-07	8.58697	9	27	2472	63681	1.7446e-05
GO:0009108	coenzyme biosynthetic process	Biological process	6	4.89779e-07	8.58697	9	27	2472	63681	1.7446e-05
GO:0009734	auxin-activated signaling pathway	Biological process	7	3.26375e-06	7.02571	9	33	2472	63681	8.20016e-05
GO:0033014	tetrapyrrole biosynthetic process	Biological process	6	3.26375e-06	7.02571	9	33	2472	63681	8.20016e-05
GO:0072593	reactive oxygen species metabolic process	Biological process	4	0.000215967	4.29349	9	54	2472	63681	0.00318184
GO:1901565	organonitrogen compound catabolic process	Biological process	5	0.01089	2.46647	9	94	2472	63681	0.0736644
GO:2000379	positive regulation of reactive oxygen species metabolic process	Biological process	7	0.0140609	2.3658	9	98	2472	63681	0.0913796
GO:0055080	cation homeostasis	Biological process	7	0.000168219	4.9829	8	43	2213	59271	0.00646067
GO:0046777	protein autophosphorylation	Biological process	9	0.00027411	4.65793	8	46	2213	59271	0.00990826
GO:0015824	proline transport	Biological process	11	0.00135618	3.69422	8	58	2213	59271	0.0282499
GO:0009631	cold acclimation	Biological process	6	0.0355122	2.12143	8	101	2213	59271	0.203946
GO:0010256	endomembrane system organization	Biological process	4	0.00935908	2.70591	8	75	2854	72400	0.253319
GO:0046352	disaccharide catabolic process	Biological process	8	0.0360089	2.11399	8	96	2854	72400	0.541467
GO:0006020	inositol metabolic process	Biological process	7	1.48163e-06	8.96032	8	23	2472	63681	4.29827e-05
GO:0009312	oligosaccharide biosynthetic process	Biological process	7	0.000219354	4.79273	8	43	2472	63681	0.00319824
GO:0006081	cellular aldehyde metabolic process	Biological process	4	0.00295485	3.27123	8	63	2472	63681	0.0261476
GO:0046486	glycerolipid metabolic process	Biological process	6	0.00395731	3.12254	8	66	2472	63681	0.0329464
GO:0009963	positive regulation of flavonoid biosynthetic process	Biological process	7	0.00520359	2.98677	8	69	2472	63681	0.0413641
GO:0009627	systemic acquired resistance	Biological process	8	0.00567931	2.94411	8	70	2472	63681	0.0439054
GO:0042743	hydrogen peroxide metabolic process	Biological process	5	0.0124428	2.57609	8	80	2472	63681	0.0835657
GO:2000243	positive regulation of reproductive process	Biological process	5	0.0451715	2.02046	8	102	2472	63681	0.219538
GO:0009751	response to salicylic acid	Biological process	6	1.98063e-05	7.81174	7	24	2213	59271	0.0016228
GO:0018130	heterocycle biosynthetic process	Biological process	5	3.5254e-05	7.21083	7	26	2213	59271	0.00240707
GO:0031086	nuclear-transcribed mRNA catabolic process, deadenylation-independent decay	Biological process	11	4.6059e-05	6.94377	7	27	2213	59271	0.00297929
GO:0031087	deadenylation-independent decapping of nuclear-transcribed mRNA	Biological process	8	0.000148241	5.8588	7	32	2213	59271	0.00674773
GO:0006576	cellular biogenic amine metabolic process	Biological process	7	0.000148241	5.8588	7	32	2213	59271	0.00674773
GO:0071489	cellular response to red or far red light	Biological process	7	0.00382234	3.47188	7	54	2213	59271	0.0572885
GO:0009828	plant-type cell wall loosening	Biological process	8	0.00752122	3.07347	7	61	2213	59271	0.0818016
GO:0080022	primary root development	Biological process	6	0.0144085	2.71713	7	69	2213	59271	0.114246
GO:0006650	glycerophospholipid metabolic process	Biological process	7	0.0144085	2.71713	7	69	2213	59271	0.114246
GO:2000070	regulation of response to water deprivation	Biological process	6	4.4269e-09	20.0363	7	9	2472	63681	2.96602e-07
GO:0048640	negative regulation of developmental growth	Biological process	6	3.78809e-08	16.3933	7	11	2472	63681	1.97401e-06
GO:0046474	glycerophospholipid biosynthetic process	Biological process	8	3.78809e-08	16.3933	7	11	2472	63681	1.97401e-06
GO:0005992	trehalose biosynthetic process	Biological process	9	8.78413e-08	15.0272	7	12	2472	63681	3.86227e-06
GO:0006995	cellular response to nitrogen starvation	Biological process	8	6.53483e-06	9.01632	7	20	2472	63681	0.000144795
GO:0006779	porphyrin-containing compound biosynthetic process	Biological process	7	9.67827e-05	6.21815	7	29	2472	63681	0.00165059
GO:0051592	response to calcium ion	Biological process	6	0.000408149	5.00907	7	36	2472	63681	0.0054176
GO:0044272	sulfur compound biosynthetic process	Biological process	5	0.00212153	3.83673	7	47	2472	63681	0.020874
GO:0010038	response to metal ion	Biological process	5	0.00270943	3.68013	7	49	2472	63681	0.02533
GO:0006071	glycerol metabolic process	Biological process	8	0.00270943	3.68013	7	49	2472	63681	0.02533
GO:0031326	regulation of cellular biosynthetic process	Biological process	6	0.00381598	3.46782	7	52	2472	63681	0.0321502
GO:0048506	regulation of timing of meristematic phase transition	Biological process	6	0.00381598	3.46782	7	52	2472	63681	0.0321502
GO:0048510	regulation of timing of transition from vegetative to reproductive phase	Biological process	7	0.0299385	2.3419	7	77	2472	63681	0.164867
GO:0015979	photosynthesis	Biological process	4	0.035845	2.25408	7	80	2472	63681	0.188186
GO:0019682	glyceraldehyde-3-phosphate metabolic process	Biological process	6	0.000157014	6.9869	6	23	2213	59271	0.00643233
GO:0006750	glutathione biosynthetic process	Biological process	9	0.000157014	6.9869	6	23	2213	59271	0.00643233
GO:0019184	nonribosomal peptide biosynthetic process	Biological process	8	0.00629725	3.57108	6	45	2213	59271	0.0737078
GO:0044283	small molecule biosynthetic process	Biological process	5	0.00953443	3.27956	6	49	2213	59271	0.0908358
GO:0008150	biological_process	Biological process	0	0.0126359	3.09036	6	52	2213	59271	0.109363
	0.0987147	BnaA03g18900D,BnaA03g42050D,BnaA03g06310D,BnaC03g21720D,BnaC03g01200D,BnaA02g26000D,BnaC05g21780D,BnaA03g56600D,BnaC04g26780D,BnaC05g28200D,BnaA01g02460D,BnaA03g31890D,BnaC09g38990D,BnaA03g33850D,BnaCnng06930D,BnaC04g03760D,BnaA01g13060D,BnaA06g32480D,BnaAnng13370D,BnaA06g24600D,BnaA03g35150D,BnaA07g12040D,BnaC07g32480D,BnaA01g21160D,BnaA02g36450D,BnaA03g46540D,BnaC07g36970D,BnaC02g16960D,BnaA06g…		0.0163835	2.92179	6	55	2213	59271	0.126637
GO:0009812	flavonoid metabolic process	Biological process	4	0.0177863	2.86962	6	56	2213	59271	0.134106
GO:0005985	sucrose metabolic process	Biological process	8	0.041344	2.36321	6	68	2213	59271	0.227855
GO:1901362	organic cyclic compound biosynthetic process	Biological process	5	0.0493323	2.26336	6	71	2213	59271	0.254746
GO:0015804	neutral amino acid transport	Biological process	10	3.4017e-09	25.7609	6	6	2472	63681	2.58713e-07
GO:0009617	response to bacterium	Biological process	6	3.4017e-09	25.7609	6	6	2472	63681	2.58713e-07
GO:0015743	malate transport	Biological process	11	3.4017e-09	25.7609	6	6	2472	63681	2.58713e-07
GO:2000112	regulation of cellular macromolecule biosynthetic process	Biological process	7	3.4017e-09	25.7609	6	6	2472	63681	2.58713e-07
GO:0019252	starch biosynthetic process	Biological process	10	1.25757e-05	10.3044	6	15	2472	63681	0.000268091
GO:0050789	regulation of biological process	Biological process	3	0.000498203	5.72465	6	27	2472	63681	0.00640156
GO:0045017	glycerolipid biosynthetic process	Biological process	7	0.000498203	5.72465	6	27	2472	63681	0.00640156
GO:0010556	regulation of macromolecule biosynthetic process	Biological process	6	0.000748118	5.32985	6	29	2472	63681	0.00884539
GO:0031323	regulation of cellular metabolic process	Biological process	5	0.000748118	5.32985	6	29	2472	63681	0.00884539
GO:0000272	polysaccharide catabolic process	Biological process	6	0.000748118	5.32985	6	29	2472	63681	0.00884539
GO:0006857	oligopeptide transport	Biological process	8	0.000748118	5.32985	6	29	2472	63681	0.00884539
GO:0010089	xylem development	Biological process	6	0.0010852	4.98598	6	31	2472	63681	0.012118
GO:0046394	carboxylic acid biosynthetic process	Biological process	8	0.0010852	4.98598	6	31	2472	63681	0.012118
GO:0016053	organic acid biosynthetic process	Biological process	6	0.0010852	4.98598	6	31	2472	63681	0.012118
GO:0044699	single-organism process	Biological process	2	0.0010852	4.98598	6	31	2472	63681	0.012118
GO:0019288	isopentenyl diphosphate biosynthetic process, methylerythritol 4-phosphate pathway	Biological process	10	0.0010852	4.98598	6	31	2472	63681	0.012118
GO:0030968	endoplasmic reticulum unfolded protein response	Biological process	6	0.00129213	4.83017	6	32	2472	63681	0.0138781
GO:0009959	negative gravitropism	Biological process	6	0.00281037	4.17745	6	37	2472	63681	0.0259291
GO:0080090	regulation of primary metabolic process	Biological process	5	0.00842766	3.36012	6	46	2472	63681	0.0609651
GO:0009967	positive regulation of signal transduction	Biological process	7	0.0179097	2.86232	6	54	2472	63681	0.111254
GO:0023056	positive regulation of signaling	Biological process	5	0.0246596	2.66492	6	58	2472	63681	0.139062
GO:0034620	cellular response to unfolded protein	Biological process	7	0.0285955	2.57609	6	60	2472	63681	0.15778
GO:0006986	response to unfolded protein	Biological process	6	0.0401745	2.37793	6	65	2472	63681	0.199384
GO:0035967	cellular response to topologically incorrect protein	Biological process	6	4.2001e-07	22.3192	5	6	2213	59271	0.000129048
GO:0042180	cellular ketone metabolic process	Biological process	5	1.55542e-05	13.3915	5	10	2213	59271	0.00173782
GO:0015740	C4-dicarboxylate transport	Biological process	10	0.00138426	5.82241	5	23	2213	59271	0.0283542
GO:0044763	single-organism cellular process	Biological process	3	0.00346385	4.7827	5	28	2213	59271	0.0525564
GO:0044237	cellular metabolic process	Biological process	3	0.00405843	4.61778	5	29	2213	59271	0.0566797
GO:0009065	glutamine family amino acid catabolic process	Biological process	11	0.00405843	4.61778	5	29	2213	59271	0.0566797
GO:0009638	phototropism	Biological process	7	0.00405843	4.61778	5	29	2213	59271	0.0566797
GO:0009240	isopentenyl diphosphate biosynthetic process	Biological process	8	0.00472244	4.46385	5	30	2213	59271	0.0617434
GO:0046490	isopentenyl diphosphate metabolic process	Biological process	7	0.00472244	4.46385	5	30	2213	59271	0.0617434
GO:0043090	amino acid import	Biological process	10	0.00546005	4.31985	5	31	2213	59271	0.0691794
GO:1900673	olefin metabolic process	Biological process	4	0.00546005	4.31985	5	31	2213	59271	0.0691794
GO:1900674	olefin biosynthetic process	Biological process	5	0.00627537	4.18486	5	32	2213	59271	0.074158
GO:0009692	ethylene metabolic process	Biological process	6	0.00815519	3.93869	5	34	2213	59271	0.0814856
GO:0009693	ethylene biosynthetic process	Biological process	7	0.00815519	3.93869	5	34	2213	59271	0.0814856
GO:0043449	cellular alkene metabolic process	Biological process	5	0.0116553	3.61934	5	37	2213	59271	0.103053
GO:0043450	alkene biosynthetic process	Biological process	6	0.0116553	3.61934	5	37	2213	59271	0.103053
GO:0042364	water-soluble vitamin biosynthetic process	Biological process	7	0.0130178	3.52409	5	38	2213	59271	0.106659
GO:0048582	positive regulation of post-embryonic development	Biological process	7	0.0144839	3.43373	5	39	2213	59271	0.11338
GO:0009911	positive regulation of flower development	Biological process	8	0.0234706	3.04353	5	44	2213	59271	0.162968
GO:0010019	chloroplast-nucleus signaling pathway	Biological process	6	0.0256172	2.9759	5	45	2213	59271	0.171106
GO:0006641	triglyceride metabolic process	Biological process	8	0.0327938	2.78991	5	48	2213	59271	0.204587
GO:0006767	water-soluble vitamin metabolic process	Biological process	6	0.0327938	2.78991	5	48	2213	59271	0.204587
GO:0009813	flavonoid biosynthetic process	Biological process	5	0.0354369	2.73297	5	49	2213	59271	0.20447
GO:0019438	aromatic compound biosynthetic process	Biological process	5	0.0472949	2.52671	5	53	2213	59271	0.245255
GO:0010161	red light signaling pathway	Biological process	9	0.000267774	8.05029	5	16	2472	63681	0.00382495
GO:0010039	response to iron ion	Biological process	6	0.000267774	8.05029	5	16	2472	63681	0.00382495
GO:0031325	positive regulation of cellular metabolic process	Biological process	6	0.000646756	6.77919	5	19	2472	63681	0.00774456
GO:0010647	positive regulation of cell communication	Biological process	6	0.00132934	5.85476	5	22	2472	63681	0.0141696
GO:0006885	regulation of pH	Biological process	9	0.00201163	5.36686	5	24	2472	63681	0.0200735
GO:0031328	positive regulation of cellular biosynthetic process	Biological process	7	0.00346948	4.77054	5	27	2472	63681	0.0298567
GO:0009620	response to fungus	Biological process	6	0.0055631	4.29349	5	30	2472	63681	0.043606
GO:0014070	response to organic cyclic compound	Biological process	5	0.00737462	4.02514	5	32	2472	63681	0.054611
GO:2000280	regulation of root development	Biological process	6	0.00841868	3.90317	5	33	2472	63681	0.0610571
GO:0019222	regulation of metabolic process	Biological process	4	0.0095607	3.78837	5	34	2472	63681	0.0670918
GO:0010087	phloem or xylem histogenesis	Biological process	5	0.0095607	3.78837	5	34	2472	63681	0.0670918
GO:0010468	regulation of gene expression	Biological process	6	0.0108048	3.68013	5	35	2472	63681	0.0736193
GO:0006818	hydrogen transport	Biological process	6	0.0108048	3.68013	5	35	2472	63681	0.0736193
GO:0015992	proton transport	Biological process	8	0.0151888	3.3896	5	38	2472	63681	0.0973602
GO:0010197	polar nucleus fusion	Biological process	7	0.0151888	3.3896	5	38	2472	63681	0.0973602
GO:0040034	regulation of development, heterochronic	Biological process	5	0.0226841	3.06678	5	42	2472	63681	0.130006
GO:0006534	cysteine metabolic process	Biological process	11	0.034956	2.74052	5	47	2472	63681	0.184207
GO:0055081	anion homeostasis	Biological process	7	0.037818	2.68343	5	48	2472	63681	0.195266
GO:0051171	regulation of nitrogen compound metabolic process	Biological process	5
GO:0009637	response to blue light	Biological process	6
GO:0009966	regulation of signal transduction	Biological process	6

## Sheet: GO terms for down regulated
GO_ID	GO_Name	Class	GO_Level	P_value	EnrichmentScore	HitsGenesCountsInSelectedSet	HitsGenesCountsInBackground	AllGenesCountsInSelectedSet	AllGenesCountsInBackground	corrected p-value(BH method)
GO:0003723	RNA binding	Molecular function	5	0	2.22291	190	2925	1732	59271	0
GO:0005507	copper ion binding	Molecular function	7	1.11022e-16	2.77469	93	1147	1732	59271	6.03961e-14
GO:0051082	unfolded protein binding	Molecular function	4	2.22045e-16	5.22981	46	301	1732	59271	8.05282e-14
GO:0003735	structural constituent of ribosome	Molecular function	3	4.44089e-16	5.32784	234	1503	1732	59271	1.20792e-13
GO:0005198	structural molecule activity	Molecular function	2	8.88178e-16	4.22398	246	1993	1732	59271	1.93268e-13
GO:0036094	small molecule binding	Molecular function	3	1.09912e-14	1.35534	514	12978	1732	59271	1.99307e-12
GO:0000166	nucleotide binding	Molecular function	5	1.21125e-13	1.35385	484	12234	1732	59271	1.88263e-11
GO:1901265	nucleoside phosphate binding	Molecular function	4	1.21125e-13	1.35385	484	12234	1732	59271	1.88263e-11
GO:0035639	purine ribonucleoside triphosphate binding	Molecular function	5	7.1021e-13	1.42393	365	8772	1732	59271	8.58565e-11
GO:0016887	ATPase activity	Molecular function	8	7.2875e-13	2.01703	118	2002	1732	59271	7.9288e-11
GO:0042623	ATPase activity, coupled	Molecular function	9	2.96685e-12	2.15425	96	1525	1732	59271	2.93448e-10
GO:0016462	pyrophosphatase activity	Molecular function	6	7.15927e-12	1.70171	173	3479	1732	59271	6.49107e-10
GO:0002020	protease binding	Molecular function	5	8.85403e-12	9.28031	16	59	1732	59271	7.41014e-10
GO:0016818	hydrolase activity, acting on acid anhydrides, in phosphorus-containing anhydrides	Molecular function	5	2.1249e-11	1.67855	173	3527	1732	59271	1.65135e-09
GO:0016817	hydrolase activity, acting on acid anhydrides	Molecular function	4	4.12089e-11	1.6644	173	3557	1732	59271	2.98902e-09
GO:0032555	purine ribonucleotide binding	Molecular function	7	5.63865e-11	1.37422	368	9164	1732	59271	3.83428e-09
GO:0097367	carbohydrate derivative binding	Molecular function	3	6.44486e-11	1.36523	378	9475	1732	59271	4.12471e-09
GO:0017076	purine nucleotide binding	Molecular function	6	9.38868e-11	1.36634	371	9292	1732	59271	5.67493e-09
GO:0017111	nucleoside-triphosphatase activity	Molecular function	7	1.46641e-10	1.66932	162	3321	1732	59271	8.39715e-09
GO:0005524	ATP binding	Molecular function	9	4.29354e-10	1.39214	318	7817	1732	59271	2.33568e-08
GO:0032553	ribonucleotide binding	Molecular function	6	4.93989e-10	1.35006	368	9328	1732	59271	2.55933e-08
GO:0008094	DNA-dependent ATPase activity	Molecular function	10	1.47832e-08	4.22958	22	178	1732	59271	7.31096e-07
GO:0008135	translation factor activity, RNA binding	Molecular function	6	1.64124e-08	2.54537	45	605	1732	59271	7.76378e-07
GO:0043168	anion binding	Molecular function	4	1.72586e-08	1.28294	414	11043	1732	59271	7.8239e-07
GO:0032559	adenyl ribonucleotide binding	Molecular function	8	2.35329e-08	1.33735	321	8214	1732	59271	1.02415e-06
GO:0097159	organic cyclic compound binding	Molecular function	3	2.86858e-08	1.15781	810	23941	1732	59271	1.20039e-06
GO:1901363	heterocyclic compound binding	Molecular function	3	3.24564e-08	1.15746	808	23889	1732	59271	1.30787e-06
GO:0030554	adenyl nucleotide binding	Molecular function	7	3.26056e-08	1.33073	324	8332	1732	59271	1.26696e-06
GO:0080176	xyloglucan 1,6-alpha-xylosidase activity	Molecular function	6	1.24041e-07	28.5176	5	6	1732	59271	4.65369e-06
GO:0004018	N6-(1,2-dicarboxyethyl)AMP AMP-lyase (fumarate-forming) activity	Molecular function	6	1.10223e-06	21.3882	5	8	1732	59271	3.99744e-05
GO:0003746	translation elongation factor activity	Molecular function	7	3.62871e-06	3.72923	17	156	1732	59271	0.000127356
GO:0070035	purine NTP-dependent helicase activity	Molecular function	9	4.30965e-06	2.52866	30	406	1732	59271	0.000146528
GO:0008026	ATP-dependent helicase activity	Molecular function	10	4.30965e-06	2.52866	30	406	1732	59271	0.000146528
GO:0001882	nucleoside binding	Molecular function	4	8.76446e-06	1.81866	60	1129	1732	59271	0.000280463
GO:0046556	alpha-L-arabinofuranosidase activity	Molecular function	6	9.48597e-06	7.39916	8	37	1732	59271	0.000294878
GO:0030060	L-malate dehydrogenase activity	Molecular function	6	9.55107e-06	8.87215	7	27	1732	59271	0.000288655
GO:0004634	phosphopyruvate hydratase activity	Molecular function	6	1.41333e-05	14.2588	5	12	1732	59271	0.000415595
GO:0008568	microtubule-severing ATPase activity	Molecular function	10	2.11573e-05	5.81114	9	53	1732	59271	0.000605767
GO:0016779	nucleotidyltransferase activity	Molecular function	5	2.1758e-05	2.04305	40	670	1732	59271	0.000606993
GO:0016842	amidine-lyase activity	Molecular function	5	2.24116e-05	13.162	5	13	1732	59271	0.000609597
GO:0001070	RNA binding transcription factor activity	Molecular function	3	2.24116e-05	13.162	5	13	1732	59271	0.000609597
GO:0001072	transcription antitermination factor activity, RNA binding	Molecular function	4	2.24116e-05	13.162	5	13	1732	59271	0.000609597
GO:0004386	helicase activity	Molecular function	8	2.92969e-05	2.01597	40	679	1732	59271	0.000741279
GO:0003887	DNA-directed DNA polymerase activity	Molecular function	7	3.01615e-05	4.53533	11	83	1732	59271	0.000745813
GO:0042973	glucan endo-1,3-beta-D-glucosidase activity	Molecular function	8	3.63229e-05	6.22202	8	44	1732	59271	0.000878206
GO:0032549	ribonucleoside binding	Molecular function	5	5.04271e-05	1.73851	57	1122	1732	59271	0.00119271
GO:0004332	fructose-bisphosphate aldolase activity	Molecular function	6	5.2832e-05	8.55528	6	24	1732	59271	0.001223
GO:0009044	xylan 1,4-beta-xylosidase activity	Molecular function	7	5.96354e-05	5.82487	8	47	1732	59271	0.00135174
GO:0005525	GTP binding	Molecular function	9	8.49416e-05	1.76469	51	989	1732	59271	0.00188605
GO:0032561	guanyl ribonucleotide binding	Molecular function	8	8.92512e-05	1.76113	51	991	1732	59271	0.00194211
GO:0019001	guanyl nucleotide binding	Molecular function	7	9.37592e-05	1.75758	51	993	1732	59271	0.0020002
GO:0003924	GTPase activity	Molecular function	8	0.000109768	2.09655	31	506	1732	59271	0.00229669
GO:0003743	translation initiation factor activity	Molecular function	7	0.000121538	2.21576	27	417	1732	59271	0.00249497
GO:0004372	glycine hydroxymethyltransferase activity	Molecular function	6	0.000164546	7.08023	6	29	1732	59271	0.00331529
GO:0004365	glyceraldehyde-3-phosphate dehydrogenase (NAD+) (phosphorylating) activity	Molecular function	7	0.000227615	8.55528	5	20	1732	59271	0.00450264
GO:0043891	glyceraldehyde-3-phosphate dehydrogenase (NAD(P)+) (phosphorylating) activity	Molecular function	6	0.000227615	8.55528	5	20	1732	59271	0.00450264
GO:0016741	transferase activity, transferring one-carbon groups	Molecular function	4	0.000229824	1.66481	54	1110	1732	59271	0.00438681
GO:0016886	ligase activity, forming phosphoric ester bonds	Molecular function	4	0.000291569	8.14789	5	21	1732	59271	0.00537673
GO:0097599	xylanase activity	Molecular function	6	0.000347055	4.56282	8	60	1732	59271	0.00609026
GO:0016879	ligase activity, forming carbon-nitrogen bonds	Molecular function	4	0.00035475	2.22341	23	354	1732	59271	0.00612647
GO:0032550	purine ribonucleoside binding	Molecular function	6	0.000446293	1.63557	52	1088	1732	59271	0.00758697
GO:0001883	purine nucleoside binding	Molecular function	5	0.000446293	1.63557	52	1088	1732	59271	0.00758697
GO:0034061	DNA polymerase activity	Molecular function	6	0.000454839	3.361	11	112	1732	59271	0.00749796
GO:0008168	methyltransferase activity	Molecular function	5	0.000557745	1.62806	51	1072	1732	59271	0.00905712
GO:0003899	DNA-directed 5'-3' RNA polymerase activity	Molecular function	8	0.000704192	2.44437	17	238	1732	59271	0.0112671
GO:0003678	DNA helicase activity	Molecular function	9	0.000756763	2.70676	14	177	1732	59271	0.0119327
GO:0043167	ion binding	Molecular function	3	0.00092772	1.10451	648	20077	1732	59271	0.01364
GO:0008422	beta-glucosidase activity	Molecular function	7	0.00106845	3.03575	11	124	1732	59271	0.0152957
GO:0016615	malate dehydrogenase activity	Molecular function	5	0.0010712	4.35542	7	55	1732	59271	0.0151359
GO:0016742	hydroxymethyl-, formyl- and related transferase activity	Molecular function	5	0.0010712	4.35542	7	55	1732	59271	0.0151359
GO:0004356	glutamate-ammonia ligase activity	Molecular function	7	0.00118844	6.11092	5	28	1732	59271	0.0163674
GO:0004427	inorganic diphosphatase activity	Molecular function	7	0.00119372	4.27764	7	56	1732	59271	0.0162345
GO:0009982	pseudouridine synthase activity	Molecular function	5	0.00119372	4.27764	7	56	1732	59271	0.0162345
GO:0000287	magnesium ion binding	Molecular function	6	0.00129764	1.92586	26	462	1732	59271	0.0168075
GO:0034062	5'-3' RNA polymerase activity	Molecular function	7	0.00199194	2.22046	17	262	1732	59271	0.0252003
GO:0097747	RNA polymerase activity	Molecular function	6	0.00199194	2.22046	17	262	1732	59271	0.0252003
GO:0003676	nucleic acid binding	Molecular function	4	0.00205612	1.13814	399	11997	1732	59271	0.0254212
GO:0003697	single-stranded DNA binding	Molecular function	6	0.00209636	2.64938	12	155	1732	59271	0.0256274
GO:0043021	ribonucleoprotein complex binding	Molecular function	4	0.00339412	3.57534	7	67	1732	59271	0.0392851
GO:0015450	P-P-bond-hydrolysis-driven protein transmembrane transporter activity	Molecular function	8	0.00350463	2.48881	12	165	1732	59271	0.0389086
GO:0015405	P-P-bond-hydrolysis-driven transmembrane transporter activity	Molecular function	6	0.00353855	1.51735	47	1060	1732	59271	0.0388883
GO:0030955	potassium ion binding	Molecular function	7	0.00361544	4.02602	6	51	1732	59271	0.039336
GO:0004743	pyruvate kinase activity	Molecular function	6	0.00361544	4.02602	6	51	1732	59271	0.039336
GO:0031420	alkali metal ion binding	Molecular function	6	0.00361544	4.02602	6	51	1732	59271	0.039336
GO:0015399	primary active transmembrane transporter activity	Molecular function	5	0.00406245	1.50599	47	1068	1732	59271	0.0429121
GO:0016874	ligase activity	Molecular function	3	0.0045237	1.52805	43	963	1732	59271	0.0468741
GO:0016717	oxidoreductase activity, acting on paired donors, with oxidation of a pair of donors resulting in the reduction of molecular oxygen to two molecules of water	Molecular function	5	0.00488582	3.04188	8	90	1732	59271	0.0501488
GO:0008173	RNA methyltransferase activity	Molecular function	6	0.0050563	2.79991	9	110	1732	59271	0.0500114
GO:0016627	oxidoreductase activity, acting on the CH-CH group of donors	Molecular function	4	0.0054409	1.67355	29	593	1732	59271	0.0533306
GO:0019843	rRNA binding	Molecular function	6	0.005777	2.24684	13	198	1732	59271	0.0556228
GO:0043022	ribosome binding	Molecular function	5	0.00596205	4.27764	5	40	1732	59271	0.056901
GO:0016905	myosin heavy chain kinase activity	Molecular function	9	0.00596205	4.27764	5	40	1732	59271	0.056901
GO:0003872	6-phosphofructokinase activity	Molecular function	8	0.00596205	4.27764	5	40	1732	59271	0.056901
GO:0004175	endopeptidase activity	Molecular function	6	0.00618309	1.48501	45	1037	1732	59271	0.0574974
GO:0016880	acid-ammonia (or amide) ligase activity	Molecular function	5	0.00734778	4.07394	5	42	1732	59271	0.0639551
GO:0016211	ammonia ligase activity	Molecular function	6	0.00734778	4.07394	5	42	1732	59271	0.0639551
GO:0019899	enzyme binding	Molecular function	4	0.00741737	1.54575	36	797	1732	59271	0.0635441
GO:0050897	cobalt ion binding	Molecular function	7	0.00772702	2.03697	15	252	1732	59271	0.0656796
GO:0004312	fatty acid synthase activity	Molecular function	6	0.00910623	2.73769	8	100	1732	59271	0.0768029
GO:0016628	oxidoreductase activity, acting on the CH-CH group of donors, NAD or NADP as acceptor	Molecular function	5	0.00931896	1.76571	21	407	1732	59271	0.0779926
GO:0008757	S-adenosylmethionine-dependent methyltransferase activity	Molecular function	6	0.00961536	1.71106	23	460	1732	59271	0.0798588
GO:0016836	hydro-lyase activity	Molecular function	5	0.0103661	1.80612	19	360	1732	59271	0.0841666
GO:0008447	L-ascorbate oxidase activity	Molecular function	6	0.0107628	3.71969	5	46	1732	59271	0.0842444
GO:0016620	oxidoreductase activity, acting on the aldehyde or oxo group of donors, NAD or NADP as acceptor	Molecular function	5	0.012384	2.04071	13	218	1732	59271	0.0910389
GO:0015926	glucosidase activity	Molecular function	6	0.0127116	2.18856	11	172	1732	59271	0.0915912
GO:0008443	phosphofructokinase activity	Molecular function	7	0.01282	3.5647	5	48	1732	59271	0.0917644
GO:0016868	intramolecular transferase activity, phosphotransferases	Molecular function	5	0.01282	3.5647	5	48	1732	59271	0.0917644
GO:0016866	intramolecular transferase activity	Molecular function	4	0.0152119	1.98605	13	224	1732	59271	0.104091
GO:0003916	DNA topoisomerase activity	Molecular function	4	0.017697	3.29049	5	52	1732	59271	0.116693
GO:0008320	protein transmembrane transporter activity	Molecular function	7	0.0193345	1.98383	12	207	1732	59271	0.126722
GO:0022884	macromolecule transmembrane transporter activity	Molecular function	5	0.0193345	1.98383	12	207	1732	59271	0.126722
GO:0008536	Ran GTPase binding	Molecular function	8	0.0196469	2.13882	10	160	1732	59271	0.12574
GO:0051287	NAD binding	Molecular function	6	0.020344	1.90933	13	233	1732	59271	0.12944
GO:0016407	acetyltransferase activity	Molecular function	6	0.0223389	1.72118	17	338	1732	59271	0.136544
GO:0045330	aspartyl esterase activity	Molecular function	5	0.0227905	1.93705	12	212	1732	59271	0.138526
GO:0043492	ATPase activity, coupled to movement of substances	Molecular function	10	0.0234825	1.42259	36	866	1732	59271	0.141939
GO:0042626	ATPase activity, coupled to transmembrane movement of substances	Molecular function	11	0.0234825	1.42259	36	866	1732	59271	0.141939
GO:0008308	voltage-gated anion channel activity	Molecular function	9	0.023664	3.05546	5	56	1732	59271	0.141464
GO:0016820	hydrolase activity, acting on acid anhydrides, catalyzing transmembrane movement of substances	Molecular function	5	0.0256659	1.4128	36	872	1732	59271	0.150943
GO:0004190	aspartic-type endopeptidase activity	Molecular function	7	0.0259481	1.75793	15	292	1732	59271	0.151782
GO:0070001	aspartic-type peptidase activity	Molecular function	6	0.0259481	1.75793	15	292	1732	59271	0.151782
GO:0004222	metalloendopeptidase activity	Molecular function	7	0.0274093	2.02492	10	169	1732	59271	0.157785
GO:0016832	aldehyde-lyase activity	Molecular function	5	0.0281948	2.59907	6	79	1732	59271	0.161452
GO:0016410	N-acyltransferase activity	Molecular function	6	0.0295353	1.72834	15	297	1732	59271	0.164792
GO:0008080	N-acetyltransferase activity	Molecular function	7	0.0307593	1.80111	13	247	1732	59271	0.170746
GO:0005253	anion channel activity	Molecular function	8	0.032764	2.80501	5	61	1732	59271	0.180037
GO:0016840	carbon-nitrogen lyase activity	Molecular function	4	0.0361594	2.25989	7	106	1732	59271	0.19285
GO:0016616	oxidoreductase activity, acting on the CH-OH group of donors, NAD or NADP as acceptor	Molecular function	5	0.0413228	1.39586	31	760	1732	59271	0.213077
GO:0030599	pectinesterase activity	Molecular function	6	0.041855	1.5481	19	420	1732	59271	0.214803
GO:0031267	small GTPase binding	Molecular function	6	0.0421509	1.88028	10	182	1732	59271	0.215306
GO:0017016	Ras GTPase binding	Molecular function	7	0.0421509	1.88028	10	182	1732	59271	0.215306
GO:0016903	oxidoreductase activity, acting on the aldehyde or oxo group of donors	Molecular function	4	0.0434633	1.63999	15	313	1732	59271	0.219944
GO:0016853	isomerase activity	Molecular function	3	0.0436464	1.347	37	940	1732	59271	0.219849
GO:0032440	2-alkenal reductase [NAD(P)] activity	Molecular function	6	0.0452043	1.66353	14	288	1732	59271	0.226646
GO:0008144	drug binding	Molecular function	3	0.0463508	2.30704	6	89	1732	59271	0.231329
GO:0022627	cytosolic small ribosomal subunit	Cellular component	7	0	6.81643	86	440	2076	72400	0
GO:0043228	non-membrane-bounded organelle	Cellular component	3	0	3.45288	499	5040	2076	72400	0
GO:0043232	intracellular non-membrane-bounded organelle	Cellular component	5	0	3.45288	499	5040	2076	72400	0
GO:0043233	organelle lumen	Cellular component	3	0	4.0405	377	3254	2076	72400	0
GO:1990904	ribonucleoprotein complex	Cellular component	3	0	4.45614	328	2567	2076	72400	0
GO:0031974	membrane-enclosed lumen	Cellular component	2	0	4.0405	377	3254	2076	72400	0
GO:0031981	nuclear lumen	Cellular component	6	0	4.03978	335	2892	2076	72400	0
GO:0009536	plastid	Cellular component	6	0	1.37946	611	15447	2076	72400	0
GO:0044391	ribosomal subunit	Cellular component	5	0	6.09434	209	1196	2076	72400	0
GO:0070013	intracellular organelle lumen	Cellular component	4	0	4.0405	377	3254	2076	72400	0
GO:0044422	organelle part	Cellular component	2	0	1.88493	809	14968	2076	72400	0
GO:0044429	mitochondrial part	Cellular component	5	0	2.72735	108	1381	2076	72400	0
GO:0044444	cytoplasmic part	Cellular component	4	0	1.36054	1365	34989	2076	72400	0
GO:0044446	intracellular organelle part	Cellular component	4	0	1.88575	808	14943	2076	72400	0
GO:0015934	large ribosomal subunit	Cellular component	6	0	6.0518	118	680	2076	72400	0
GO:0005737	cytoplasm	Cellular component	4	0	1.25567	1494	41494	2076	72400	0
GO:0005739	mitochondrion	Cellular component	6	0	1.68493	447	9252	2076	72400	0
GO:0005773	vacuole	Cellular component	6	0	1.79151	255	4964	2076	72400	0
GO:0005794	Golgi apparatus	Cellular component	6	0	1.88016	297	5509	2076	72400	0
GO:0005829	cytosol	Cellular component	5	0	2.47792	714	10049	2076	72400	0
GO:0030529	intracellular ribonucleoprotein complex	Cellular component	4	0	4.45614	328	2567	2076	72400	0
GO:0048046	apoplast	Cellular component	3	0	2.62697	156	2071	2076	72400	0
GO:0022625	cytosolic large ribosomal subunit	Cellular component	7	1.11022e-16	6.74585	106	548	2076	72400	1.98875e-15
GO:0012505	endomembrane system	Cellular component	3	1.11022e-16	1.55908	366	8187	2076	72400	1.98875e-15
GO:0044437	vacuolar part	Cellular component	5	1.11022e-16	2.36748	208	3064	2076	72400	1.98875e-15
GO:0005774	vacuolar membrane	Cellular component	6	1.11022e-16	2.38538	208	3041	2076	72400	1.98875e-15
GO:0005840	ribosome	Cellular component	6	1.11022e-16	5.05406	291	2008	2076	72400	1.98875e-15
GO:0022626	cytosolic ribosome	Cellular component	7	2.22045e-16	6.05465	250	1440	2076	72400	3.26723e-15
GO:0032991	macromolecular complex	Cellular component	2	2.22045e-16	2.20468	507	8020	2076	72400	3.26723e-15
GO:0098588	bounding membrane of organelle	Cellular component	4	2.22045e-16	2.04291	225	3841	2076	72400	3.26723e-15
GO:0009506	plasmodesma	Cellular component	4	2.22045e-16	2.2698	351	5393	2076	72400	3.26723e-15
GO:0009507	chloroplast	Cellular component	7	2.22045e-16	1.39037	602	15100	2076	72400	3.26723e-15
GO:0044428	nuclear part	Cellular component	5	2.22045e-16	3.5152	355	3522	2076	72400	3.26723e-15
GO:0005730	nucleolus	Cellular component	6	2.22045e-16	5.3193	311	2039	2076	72400	3.26723e-15
GO:0055044	symplast	Cellular component	2	2.22045e-16	2.2698	351	5393	2076	72400	3.26723e-15
GO:0030054	cell junction	Cellular component	2	3.33067e-16	2.2656	351	5403	2076	72400	3.81177e-15
GO:0098805	whole membrane	Cellular component	3	3.33067e-16	2.10468	221	3662	2076	72400	3.81177e-15
GO:0005911	cell-cell junction	Cellular component	3	3.33067e-16	2.2656	351	5403	2076	72400	3.81177e-15
GO:0044445	cytosolic part	Cellular component	5	4.44089e-16	6.01607	261	1513	2076	72400	4.6914e-15
GO:0015935	small ribosomal subunit	Cellular component	6	4.44089e-16	5.97665	91	531	2076	72400	4.6914e-15
GO:0030312	external encapsulating structure	Cellular component	3	4.44089e-16	2.77819	264	3314	2076	72400	4.6914e-15
GO:0005618	cell wall	Cellular component	4	7.77156e-16	2.79167	264	3298	2076	72400	7.62353e-15
GO:0071944	cell periphery	Cellular component	3	9.99201e-16	1.36832	669	17051	2076	72400	9.57374e-15
GO:0031090	organelle membrane	Cellular component	3	9.99201e-16	1.93155	271	4893	2076	72400	9.57374e-15
GO:0016020	membrane	Cellular component	2	7.10543e-15	1.23821	864	24335	2076	72400	6.50541e-14
GO:0030684	preribosome	Cellular component	5	5.20695e-13	9.23155	18	68	2076	72400	4.66361e-12
GO:0005740	mitochondrial envelope	Cellular component	6	1.61449e-12	2.41584	78	1126	2076	72400	1.41525e-11
GO:0005759	mitochondrial matrix	Cellular component	6	2.73459e-11	4.05815	32	275	2076	72400	2.34719e-10
GO:0030686	90S preribosome	Cellular component	6	5.22726e-11	17.4374	10	20	2076	72400	4.39517e-10
GO:0009505	plant-type cell wall	Cellular component	5	5.24712e-10	2.08095	83	1391	2076	72400	4.32363e-09
GO:0031967	organelle envelope	Cellular component	5	5.40745e-10	1.5829	186	4098	2076	72400	4.36837e-09
GO:0031975	envelope	Cellular component	3	6.76738e-10	1.57827	186	4110	2076	72400	5.36185e-09
GO:0005886	plasma membrane	Cellular component	3	1.31486e-09	1.26218	536	14810	2076	72400	1.02212e-08
GO:0046658	anchored component of plasma membrane	Cellular component	5	4.71505e-09	3.38908	31	319	2076	72400	3.59741e-08
GO:0009570	chloroplast stroma	Cellular component	7	6.68328e-09	1.6479	141	2984	2076	72400	5.00638e-08
GO:0043226	organelle	Cellular component	2	7.77139e-09	1.06836	1674	54645	2076	72400	5.71753e-08
GO:0043229	intracellular organelle	Cellular component	4	8.36659e-09	1.06829	1673	54616	2076	72400	6.04743e-08
GO:0042555	MCM complex	Cellular component	4	1.14086e-08	13.078	9	24	2076	72400	8.10403e-08
GO:0044464	cell part	Cellular component	2	1.20795e-08	1.03028	1996	67564	2076	72400	8.4352e-08
GO:0005623	cell	Cellular component	2	1.20795e-08	1.03028	1996	67564	2076	72400	8.4352e-08
GO:0009532	plastid stroma	Cellular component	6	2.27653e-08	1.61489	141	3045	2076	72400	1.53759e-07
GO:0044424	intracellular part	Cellular component	3	4.2771e-08	1.04773	1842	61313	2076	72400	2.8422e-07
GO:0005622	intracellular	Cellular component	3	5.19208e-08	1.04706	1845	61452	2076	72400	3.39546e-07
GO:0044434	chloroplast part	Cellular component	6	7.56381e-07	1.3966	208	5194	2076	72400	4.8692e-06
GO:0043227	membrane-bounded organelle	Cellular component	3	9.41242e-07	1.05946	1639	53952	2076	72400	5.96603e-06
GO:0043231	intracellular membrane-bounded organelle	Cellular component	5	1.09041e-06	1.05954	1633	53750	2076	72400	6.8068e-06
GO:0031966	mitochondrial membrane	Cellular component	6	1.38362e-06	1.94665	59	1057	2076	72400	8.50823e-06
GO:0044435	plastid part	Cellular component	5	1.92655e-06	1.37603	209	5297	2076	72400	1.16726e-05
GO:0005788	endoplasmic reticulum lumen	Cellular component	6	2.44228e-06	7.47316	9	42	2076	72400	1.45829e-05
GO:0031226	intrinsic component of plasma membrane	Cellular component	4	2.63251e-06	2.32498	37	555	2076	72400	1.54942e-05
GO:0005743	mitochondrial inner membrane	Cellular component	7	4.33075e-06	1.98064	51	898	2076	72400	2.51306e-05
GO:0044459	plasma membrane part	Cellular component	3	5.58714e-06	1.87117	58	1081	2076	72400	3.19709e-05
GO:0019866	organelle inner membrane	Cellular component	4	9.55942e-06	1.83718	58	1101	2076	72400	5.39518e-05
GO:0000015	phosphopyruvate hydratase complex	Cellular component	6	1.29104e-05	14.5311	5	12	2076	72400	7.18795e-05
GO:0031970	organelle envelope lumen	Cellular component	5	2.23101e-05	6.64281	8	42	2076	72400	0.000122557
GO:0005758	mitochondrial intermembrane space	Cellular component	6	2.23101e-05	6.64281	8	42	2076	72400	0.000122557
GO:0032040	small-subunit processome	Cellular component	6	2.67215e-05	6.48833	8	43	2076	72400	0.000142977
GO:0098798	mitochondrial protein complex	Cellular component	6	0.00021151	1.99641	32	559	2076	72400	0.00111721
GO:0030894	replisome	Cellular component	6	0.000267417	8.30351	5	21	2076	72400	0.0013772
GO:0044455	mitochondrial membrane part	Cellular component	6	0.000362821	1.85449	36	677	2076	72400	0.00182295
GO:0080008	Cul4-RING E3 ubiquitin ligase complex	Cellular component	7	0.000494056	2.06078	26	440	2076	72400	0.00245242
GO:0043234	protein complex	Cellular component	3	0.000809034	1.29649	149	4008	2076	72400	0.00392144
GO:0005732	small nucleolar ribonucleoprotein complex	Cellular component	5	0.000967064	3.29007	10	106	2076	72400	0.00452762
GO:0005834	heterotrimeric G-protein complex	Cellular component	6	0.00157873	2.27154	17	261	2076	72400	0.0073083
GO:1905360	GTPase complex	Cellular component	4	0.00157873	2.27154	17	261	2076	72400	0.0073083
GO:0031461	cullin-RING ubiquitin ligase complex	Cellular component	6	0.00163372	1.78402	31	606	2076	72400	0.00739662
GO:0031234	extrinsic component of cytoplasmic side of plasma membrane	Cellular component	5	0.00171181	2.25426	17	263	2076	72400	0.00766595
GO:0005680	anaphase-promoting complex	Cellular component	7	0.00176055	5.62496	5	31	2076	72400	0.00779944
GO:0031225	anchored component of membrane	Cellular component	4	0.00178937	1.65464	39	822	2076	72400	0.00784277
GO:0098800	inner mitochondrial membrane protein complex	Cellular component	7	0.00192682	1.82522	28	535	2076	72400	0.00835629
GO:0019897	extrinsic component of plasma membrane	Cellular component	4	0.00225424	2.19582	17	270	2076	72400	0.00967445
GO:0098799	outer mitochondrial membrane protein complex	Cellular component	7	0.00234555	5.28405	5	33	2076	72400	0.00996255
GO:0005742	mitochondrial outer membrane translocase complex	Cellular component	8	0.00234555	5.28405	5	33	2076	72400	0.00996255
GO:0009898	cytoplasmic side of plasma membrane	Cellular component	5	0.00315592	2.12499	17	279	2076	72400	0.0131337
GO:0005945	6-phosphofructokinase complex	Cellular component	6	0.00347101	4.84372	5	36	2076	72400	0.014159
GO:0005747	mitochondrial respiratory chain complex I	Cellular component	8	0.00359261	2.15443	16	259	2076	72400	0.0145113
GO:0098797	plasma membrane protein complex	Cellular component	5	0.00431111	2.01201	18	312	2076	72400	0.0165998
GO:0016592	mediator complex	Cellular component	7	0.00436148	2.54055	11	151	2076	72400	0.0166382
GO:0045271	respiratory chain complex I	Cellular component	6	0.00447494	2.10565	16	265	2076	72400	0.0169144
GO:0030964	NADH dehydrogenase complex	Cellular component	5	0.00447494	2.10565	16	265	2076	72400	0.0169144
GO:0005741	mitochondrial outer membrane	Cellular component	7	0.00506649	2.37782	12	176	2076	72400	0.0186375
GO:0098552	side of membrane	Cellular component	3	0.00506934	1.98027	18	317	2076	72400	0.0184829
GO:0033290	eukaryotic 48S preinitiation complex	Cellular component	6	0.00533538	3.29896	7	74	2076	72400	0.0192823
GO:0016282	eukaryotic 43S preinitiation complex	Cellular component	6	0.00533538	3.29896	7	74	2076	72400	0.0192823
GO:0009941	chloroplast envelope	Cellular component	7	0.0055515	1.3016	97	2599	2076	72400	0.0197174
GO:0070469	respiratory chain	Cellular component	3	0.00640408	1.80104	22	426	2076	72400	0.0225511
GO:0098562	cytoplasmic side of membrane	Cellular component	4	0.00645521	1.97624	17	300	2076	72400	0.0225385
GO:0070993	translation preinitiation complex	Cellular component	5	0.00662412	3.17043	7	77	2076	72400	0.0229339
GO:0005744	mitochondrial inner membrane presequence translocase complex	Cellular component	8	0.0081308	3.05154	7	80	2076	72400	0.027685
GO:0005657	replication fork	Cellular component	6	0.00828537	3.96304	5	44	2076	72400	0.0277526
GO:0000228	nuclear chromosome	Cellular component	7	0.00947957	2.19108	12	191	2076	72400	0.0314966
GO:0005576	extracellular region	Cellular component	2	0.00951901	1.14032	288	8808	2076	72400	0.0313747
GO:1902494	catalytic complex	Cellular component	3	0.00993368	1.27271	97	2658	2076	72400	0.0324816
GO:0005852	eukaryotic translation initiation factor 3 complex	Cellular component	5	0.0111811	2.87204	7	85	2076	72400	0.0362725
GO:0009526	plastid envelope	Cellular component	6	0.0119292	1.26007	99	2740	2076	72400	0.0372335
GO:0098803	respiratory chain complex	Cellular component	5	0.0157477	1.73008	19	383	2076	72400	0.0480596
GO:0019013	viral nucleocapsid	Cellular component	3	0.0199625	2.24195	9	140	2076	72400	0.0595981
GO:0005746	mitochondrial respiratory chain	Cellular component	7	0.02046	1.68178	19	394	2076	72400	0.0606441
GO:0019028	viral capsid	Cellular component	3	0.0207998	2.22605	9	141	2076	72400	0.0612109
GO:0019898	extrinsic component of membrane	Cellular component	3	0.0218823	1.64504	20	424	2076	72400	0.0639396
GO:0044423	virion part	Cellular component	2	0.0225498	2.19491	9	143	2076	72400	0.0654262
GO:0019012	virion	Cellular component	2	0.0225498	2.19491	9	143	2076	72400	0.0654262
GO:0044454	nuclear chromosome part	Cellular component	6	0.0234632	2.17967	9	144	2076	72400	0.0671307
GO:0005643	nuclear pore	Cellular component	6	0.0244026	2.16464	9	145	2076	72400	0.069337
GO:0000152	nuclear ubiquitin ligase complex	Cellular component	6	0.0287212	2.90623	5	60	2076	72400	0.0804976
GO:0032993	protein-DNA complex	Cellular component	3	0.0291439	1.86829	12	224	2076	72400	0.0811303
GO:0019867	outer membrane	Cellular component	3	0.0470523	1.59427	16	350	2076	72400	0.12588
GO:0000314	organellar small ribosomal subunit	Cellular component	7	0.0480568	2.52716	5	69	2076	72400	0.127738
GO:0098796	membrane protein complex	Cellular component	4	0.0499543	1.2392	63	1773	2076	72400	0.13109
GO:0008213	protein alkylation	Biological process	8	0	2.80541	115	1366	1911	63681	0
GO:0016570	histone modification	Biological process	8	0	2.40892	126	1743	1911	63681	0
GO:0016571	histone methylation	Biological process	10	0	2.73719	109	1327	1911	63681	0
GO:0090407	organophosphate biosynthetic process	Biological process	6	0	2.73159	276	3367	1911	63681	0
GO:1901137	carbohydrate derivative biosynthetic process	Biological process	5	0	2.13875	229	3568	1911	63681	0
GO:0033365	protein localization to organelle	Biological process	6	0	2.46107	174	2356	1911	63681	0
GO:1901293	nucleoside phosphate biosynthetic process	Biological process	8	0	5.25678	230	1458	1911	63681	0
GO:1901360	organic cyclic compound metabolic process	Biological process	4	0	1.37488	965	23389	1911	63681	0
GO:0009141	nucleoside triphosphate metabolic process	Biological process	8	0	2.61562	127	1618	1911	63681	0
GO:0070585	protein localization to mitochondrion	Biological process	7	0	4.87659	60	410	1911	63681	0
GO:0009165	nucleotide biosynthetic process	Biological process	9	0	5.28943	230	1449	1911	63681	0
GO:0046034	ATP metabolic process	Biological process	11	0	2.59663	120	1540	1911	63681	0
GO:1901564	organonitrogen compound metabolic process	Biological process	4	0	1.35841	962	23599	1911	63681	0
GO:1901566	organonitrogen compound biosynthetic process	Biological process	5	0	2.10176	607	9624	1911	63681	0
GO:0042026	protein refolding	Biological process	4	0	13.764	19	46	1911	63681	0
GO:0009260	ribonucleotide biosynthetic process	Biological process	10	0	5.61199	161	956	1911	63681	0
GO:0009408	response to heat	Biological process	5	0	2.77511	126	1513	1911	63681	0
GO:0009451	RNA modification	Biological process	8	0	5.04343	247	1632	1911	63681	0
GO:0042254	ribosome biogenesis	Biological process	5	0	3.83841	179	1554	1911	63681	0
GO:0046364	monosaccharide biosynthetic process	Biological process	7	0	3.09186	99	1067	1911	63681	0
GO:0046390	ribose phosphate biosynthetic process	Biological process	7	0	5.61199	161	956	1911	63681	0
GO:0009553	embryo sac development	Biological process	6	0	2.95352	92	1038	1911	63681	0
GO:0009561	megagametogenesis	Biological process	4	0	3.34091	78	778	1911	63681	0
GO:0046483	heterocycle metabolic process	Biological process	4	0	1.40715	898	21266	1911	63681	0
GO:0071166	ribonucleoprotein complex localization	Biological process	4	0	4.42346	45	339	1911	63681	0
GO:0018022	peptidyl-lysine methylation	Biological process	10	0	3.09344	101	1088	1911	63681	0
GO:0034470	ncRNA processing	Biological process	9	0	2.54265	104	1363	1911	63681	0
GO:0034504	protein localization to nucleus	Biological process	7	0	5.25031	98	622	1911	63681	0
GO:0071426	ribonucleoprotein complex export from nucleus	Biological process	11	0	4.42346	45	339	1911	63681	0
GO:0010038	response to metal ion	Biological process	5	0	2.24038	246	3659	1911	63681	0
GO:0034641	cellular nitrogen compound metabolic process	Biological process	4	0	1.50325	1009	22367	1911	63681	0
GO:0046939	nucleotide phosphorylation	Biological process	9	0	2.90741	117	1341	1911	63681	0
GO:0006094	gluconeogenesis	Biological process	9	0	3.27826	97	986	1911	63681	0
GO:0006096	glycolytic process	Biological process	13	0	2.99359	114	1269	1911	63681	0
GO:0051169	nuclear transport	Biological process	6	0	4.18779	117	931	1911	63681	0
GO:1902580	single-organism cellular localization	Biological process	4	0	2.88628	121	1397	1911	63681	0
GO:0006163	purine nucleotide metabolic process	Biological process	9	0	2.90457	165	1893	1911	63681	0
GO:0006165	nucleoside diphosphate phosphorylation	Biological process	10	0	3.00351	116	1287	1911	63681	0
GO:1902593	single-organism nuclear import	Biological process	9	0	5.34483	98	611	1911	63681	0
GO:0006220	pyrimidine nucleotide metabolic process	Biological process	9	0	7.28799	152	695	1911	63681	0
GO:0006221	pyrimidine nucleotide biosynthetic process	Biological process	10	0	7.28799	152	695	1911	63681	0
GO:0006403	RNA localization	Biological process	4	0	4.26985	46	359	1911	63681	0
GO:0006479	protein methylation	Biological process	9	0	2.80541	115	1366	1911	63681	0
GO:0006518	peptide metabolic process	Biological process	6	0	3.01497	304	3360	1911	63681	0
GO:0043414	macromolecule methylation	Biological process	6	0	4.09547	322	2620	1911	63681	0
GO:0006606	protein import into nucleus	Biological process	10	0	5.34483	98	611	1911	63681	0
GO:0006626	protein targeting to mitochondrion	Biological process	11	0	4.87659	60	410	1911	63681	0
GO:0006725	cellular aromatic compound metabolic process	Biological process	4	0	1.3608	922	22578	1911	63681	0
GO:0006732	coenzyme metabolic process	Biological process	5	0	1.98444	183	3073	1911	63681	0
GO:0043603	cellular amide metabolic process	Biological process	5	0	2.95094	318	3591	1911	63681	0
GO:0006753	nucleoside phosphate metabolic process	Biological process	7	0	3.11532	356	3808	1911	63681	0
GO:0006757	ATP generation from ADP	Biological process	12	0	2.99359	114	1269	1911	63681	0
GO:0006913	nucleocytoplasmic transport	Biological process	7	0	4.18779	117	931	1911	63681	0
GO:0072521	purine-containing compound metabolic process	Biological process	5	0	2.82887	168	1979	1911	63681	0
GO:0072527	pyrimidine-containing compound metabolic process	Biological process	5	0	6.69994	152	756	1911	63681	0
GO:0072528	pyrimidine-containing compound biosynthetic process	Biological process	6	0	6.89137	152	735	1911	63681	0
GO:0006996	organelle organization	Biological process	4	0	1.50467	416	9213	1911	63681	0
GO:0007005	mitochondrion organization	Biological process	5	0	4.41635	66	498	1911	63681	0
GO:0019319	hexose biosynthetic process	Biological process	8	0	3.2099	97	1007	1911	63681	0
GO:0072594	establishment of protein localization to organelle	Biological process	7	0	2.5188	174	2302	1911	63681	0
GO:0072655	establishment of protein localization to mitochondrion	Biological process	8	0	4.87659	60	410	1911	63681	0
GO:0044085	cellular component biogenesis	Biological process	3	0	1.66141	349	7000	1911	63681	0
GO:0019637	organophosphate metabolic process	Biological process	5	0	2.2994	384	5565	1911	63681	0
GO:0044238	primary metabolic process	Biological process	3	0	1.14709	1372	39857	1911	63681	0
GO:0044249	cellular biosynthetic process	Biological process	4	0	1.26067	956	25270	1911	63681	0
GO:0019693	ribose phosphate metabolic process	Biological process	6	0	3.06086	283	3081	1911	63681	0
GO:0016052	carbohydrate catabolic process	Biological process	5	0	2.09461	143	2275	1911	63681	0
GO:1901135	carbohydrate derivative metabolic process	Biological process	4	1.11022e-16	1.84986	356	6413	1911	63681	4.26456e-15
GO:0017038	protein import	Biological process	9	1.11022e-16	3.24541	112	1150	1911	63681	4.26456e-15
GO:0009117	nucleotide metabolic process	Biological process	8	1.11022e-16	3.12846	356	3792	1911	63681	4.26456e-15
GO:0009123	nucleoside monophosphate metabolic process	Biological process	8	1.11022e-16	2.73623	140	1705	1911	63681	4.26456e-15
GO:0009126	purine nucleoside monophosphate metabolic process	Biological process	9	1.11022e-16	2.76138	133	1605	1911	63681	4.26456e-15
GO:0009132	nucleoside diphosphate metabolic process	Biological process	8	1.11022e-16	2.98761	117	1305	1911	63681	4.26456e-15
GO:0009167	purine ribonucleoside monophosphate metabolic process	Biological process	10	1.11022e-16	2.76138	133	1605	1911	63681	4.26456e-15
GO:0009218	pyrimidine ribonucleotide metabolic process	Biological process	10	1.11022e-16	7.36674	149	674	1911	63681	4.26456e-15
GO:0009220	pyrimidine ribonucleotide biosynthetic process	Biological process	11	1.11022e-16	7.36674	149	674	1911	63681	4.26456e-15
GO:1901576	organic substance biosynthetic process	Biological process	4	1.11022e-16	1.30288	1049	26830	1911	63681	4.26456e-15
GO:0009266	response to temperature stimulus	Biological process	4	1.11022e-16	1.74138	257	4918	1911	63681	4.26456e-15
GO:0001510	RNA methylation	Biological process	9	1.11022e-16	6.71916	222	1101	1911	63681	4.26456e-15
GO:0006139	nucleobase-containing compound metabolic process	Biological process	5	1.11022e-16	1.47364	858	19402	1911	63681	4.26456e-15
GO:0043043	peptide biosynthetic process	Biological process	7	1.11022e-16	3.10826	301	3227	1911	63681	4.26456e-15
GO:0006405	RNA export from nucleus	Biological process	9	1.11022e-16	4.28444	45	350	1911	63681	4.26456e-15
GO:0006412	translation	Biological process	8	1.11022e-16	3.14411	299	3169	1911	63681	4.26456e-15
GO:0016072	rRNA metabolic process	Biological process	9	1.11022e-16	2.78683	94	1124	1911	63681	4.26456e-15
GO:0009150	purine ribonucleotide metabolic process	Biological process	10	2.22045e-16	2.56626	135	1753	1911	63681	6.8233e-15
GO:0009259	ribonucleotide metabolic process	Biological process	9	2.22045e-16	3.80597	270	2364	1911	63681	6.8233e-15
GO:0009560	embryo sac egg cell differentiation	Biological process	6	2.22045e-16	3.66918	61	554	1911	63681	6.8233e-15
GO:0055086	nucleobase-containing small molecule metabolic process	Biological process	6	2.22045e-16	3.04948	359	3923	1911	63681	6.8233e-15
GO:0051170	nuclear import	Biological process	8	2.22045e-16	5.25876	98	621	1911	63681	6.8233e-15
GO:1902582	single-organism intracellular transport	Biological process	6	2.22045e-16	3.18998	121	1264	1911	63681	6.8233e-15
GO:0034968	histone lysine methylation	Biological process	11	2.22045e-16	3.10485	101	1084	1911	63681	6.8233e-15
GO:0032259	methylation	Biological process	3	2.22045e-16	3.53122	348	3284	1911	63681	6.8233e-15
GO:0016043	cellular component organization	Biological process	3	2.22045e-16	1.35536	590	14506	1911	63681	6.8233e-15
GO:0009135	purine nucleoside diphosphate metabolic process	Biological process	9	3.33067e-16	2.99123	114	1270	1911	63681	9.25501e-15
GO:0009144	purine nucleoside triphosphate metabolic process	Biological process	9	3.33067e-16	2.60941	122	1558	1911	63681	9.25501e-15
GO:0046031	ADP metabolic process	Biological process	11	3.33067e-16	2.99123	114	1270	1911	63681	9.25501e-15
GO:0009179	purine ribonucleoside diphosphate metabolic process	Biological process	10	3.33067e-16	2.99123	114	1270	1911	63681	9.25501e-15
GO:0009185	ribonucleoside diphosphate metabolic process	Biological process	9	3.33067e-16	2.99123	114	1270	1911	63681	9.25501e-15
GO:0009205	purine ribonucleoside triphosphate metabolic process	Biological process	10	3.33067e-16	2.60941	122	1558	1911	63681	9.25501e-15
GO:0050657	nucleic acid transport	Biological process	7	3.33067e-16	4.28178	46	358	1911	63681	9.25501e-15
GO:0050658	RNA transport	Biological process	8	3.33067e-16	4.28178	46	358	1911	63681	9.25501e-15
GO:0046686	response to cadmium ion	Biological process	6	3.33067e-16	2.40879	217	3002	1911	63681	9.25501e-15
GO:0006006	glucose metabolic process	Biological process	8	3.33067e-16	2.36937	109	1533	1911	63681	9.25501e-15
GO:0051186	cofactor metabolic process	Biological process	4	3.33067e-16	1.76997	214	4029	1911	63681	9.25501e-15
GO:0051236	establishment of RNA localization	Biological process	4	3.33067e-16	4.28178	46	358	1911	63681	9.25501e-15
GO:0022613	ribonucleoprotein complex biogenesis	Biological process	4	3.33067e-16	3.73554	189	1686	1911	63681	9.25501e-15
GO:0071840	cellular component organization or biogenesis	Biological process	2	3.33067e-16	1.4924	724	16166	1911	63681	9.25501e-15
GO:0043604	amide biosynthetic process	Biological process	6	3.33067e-16	3.07646	309	3347	1911	63681	9.25501e-15
GO:0044271	cellular nitrogen compound biosynthetic process	Biological process	5	3.33067e-16	1.53425	699	15182	1911	63681	9.25501e-15
GO:0044281	small molecule metabolic process	Biological process	4	3.33067e-16	1.47052	587	13302	1911	63681	9.25501e-15
GO:0009161	ribonucleoside monophosphate metabolic process	Biological process	9	4.44089e-16	2.69761	136	1680	1911	63681	1.04501e-14
GO:0042542	response to hydrogen peroxide	Biological process	6	4.44089e-16	2.8812	76	879	1911	63681	1.04501e-14
GO:0006364	rRNA processing	Biological process	10	4.44089e-16	2.83475	94	1105	1911	63681	1.04501e-14
GO:0006839	mitochondrial transport	Biological process	6	4.44089e-16	3.89345	68	582	1911	63681	1.04501e-14
GO:0007292	female gamete generation	Biological process	5	4.44089e-16	3.40371	62	607	1911	63681	1.04501e-14
GO:0044711	single-organism biosynthetic process	Biological process	4	4.44089e-16	1.43231	595	13843	1911	63681	1.04501e-14
GO:0009058	biosynthetic process	Biological process	3	5.55112e-16	1.2905	1062	27423	1911	63681	1.23927e-14
GO:0006090	pyruvate metabolic process	Biological process	9	5.55112e-16	2.0924	135	2150	1911	63681	1.23927e-14
GO:0010187	negative regulation of seed germination	Biological process	9	5.55112e-16	7.93414	25	105	1911	63681	1.23927e-14
GO:0006457	protein folding	Biological process	3	5.55112e-16	3.55277	137	1285	1911	63681	1.23927e-14
GO:0006807	nitrogen compound metabolic process	Biological process	3	5.55112e-16	1.2053	1225	33868	1911	63681	1.23927e-14
GO:0044267	cellular protein metabolic process	Biological process	6	5.55112e-16	1.3259	626	15733	1911	63681	1.23927e-14
GO:0044724	single-organism carbohydrate catabolic process	Biological process	6	5.55112e-16	2.24068	125	1859	1911	63681	1.23927e-14
GO:0009199	ribonucleoside triphosphate metabolic process	Biological process	9	6.66134e-16	2.59044	125	1608	1911	63681	1.40318e-14
GO:0006164	purine nucleotide biosynthetic process	Biological process	10	1.22125e-15	3.75164	51	453	1911	63681	2.55191e-14
GO:0010467	gene expression	Biological process	5	1.22125e-15	1.32493	622	15644	1911	63681	2.55191e-14
GO:0006733	oxidoreduction coenzyme metabolic process	Biological process	6	1.33227e-15	2.04403	142	2315	1911	63681	2.74007e-14
GO:0072522	purine-containing compound biosynthetic process	Biological process	6	1.88738e-15	3.56329	54	505	1911	63681	3.85143e-14
GO:0016569	covalent chromatin modification	Biological process	6	1.9984e-15	2.11892	128	2013	1911	63681	4.04638e-14
GO:0044237	cellular metabolic process	Biological process	3	2.66454e-15	1.1328	1365	40154	1911	63681	5.35367e-14
GO:0010035	response to inorganic substance	Biological process	4	3.21965e-15	1.51027	341	7524	1911	63681	6.41963e-14
GO:0006611	protein export from nucleus	Biological process	10	3.33067e-15	4.02025	45	373	1911	63681	6.59069e-14
GO:0009644	response to high light intensity	Biological process	7	3.88578e-15	2.63248	82	1038	1911	63681	7.63132e-14
GO:0046496	nicotinamide nucleotide metabolic process	Biological process	10	8.77076e-15	2.07967	128	2051	1911	63681	1.70964e-13
GO:0034660	ncRNA metabolic process	Biological process	8	9.54792e-15	2.17986	115	1758	1911	63681	1.84735e-13
GO:0019362	pyridine nucleotide metabolic process	Biological process	9	1.0103e-14	2.07663	128	2054	1911	63681	1.94038e-13
GO:0051168	nuclear export	Biological process	8	1.06581e-14	3.90508	45	384	1911	63681	2.03205e-13
GO:0071704	organic substance metabolic process	Biological process	3	1.12133e-14	1.11768	1436	42814	1911	63681	2.12239e-13
GO:0022412	cellular process involved in reproduction in multicellular organism	Biological process	4	1.59872e-14	2.92078	66	753	1911	63681	3.00422e-13
GO:0061647	histone H3-K9 modification	Biological process	9	1.84297e-14	2.88458	67	774	1911	63681	3.43846e-13
GO:0051567	histone H3-K9 methylation	Biological process	12	1.84297e-14	2.88458	67	774	1911	63681	3.43846e-13
GO:0000478	endonucleolytic cleavage involved in rRNA processing	Biological process	10	2.14273e-14	8.14572	22	90	1911	63681	3.94142e-13
GO:0072524	pyridine-containing compound metabolic process	Biological process	5	2.20934e-14	2.05462	128	2076	1911	63681	4.03553e-13
GO:0019318	hexose metabolic process	Biological process	7	4.58522e-14	2.17284	110	1687	1911	63681	8.31708e-13
GO:0000469	cleavage involved in rRNA processing	Biological process	9	7.17204e-14	7.717	22	95	1911	63681	1.29196e-12
GO:0006260	DNA replication	Biological process	8	7.68274e-14	2.35987	91	1285	1911	63681	1.37447e-12
GO:0018205	peptidyl-lysine modification	Biological process	9	8.21565e-14	2.14429	111	1725	1911	63681	1.45981e-12
GO:0006793	phosphorus metabolic process	Biological process	4	1.1513e-13	1.34122	518	12870	1911	63681	2.03189e-12
GO:0007276	gamete generation	Biological process	4	1.18239e-13	2.65701	72	903	1911	63681	2.07275e-12
GO:0000741	karyogamy	Biological process	6	3.27738e-13	4.26919	36	281	1911	63681	5.70701e-12
GO:0042991	transcription factor import into nucleus	Biological process	11	4.31655e-13	5.39338	28	173	1911	63681	7.46677e-12
GO:0006261	DNA-dependent DNA replication	Biological process	9	5.25135e-13	2.46606	78	1054	1911	63681	9.02404e-12
GO:0048284	organelle fusion	Biological process	5	5.58664e-13	4.19455	36	286	1911	63681	9.53746e-12
GO:0042255	ribosome assembly	Biological process	8	5.88529e-13	13.3294	14	35	1911	63681	9.98207e-12
GO:0006997	nucleus organization	Biological process	5	1.35048e-12	3.40807	45	440	1911	63681	2.27577e-11
GO:0019538	protein metabolic process	Biological process	5	2.08811e-12	1.25866	667	17659	1911	63681	3.49624e-11
GO:0051028	mRNA transport	Biological process	9	3.23819e-12	3.8651	37	319	1911	63681	5.38735e-11
GO:0005996	monosaccharide metabolic process	Biological process	6	3.86313e-12	1.9813	116	1951	1911	63681	6.38639e-11
GO:0006325	chromatin organization	Biological process	4	4.11415e-12	1.80787	148	2728	1911	63681	6.7586e-11
GO:0071427	mRNA-containing ribonucleoprotein complex export from nucleus	Biological process	12	6.70153e-12	3.85737	36	311	1911	63681	1.09402e-10
GO:0006406	mRNA export from nucleus	Biological process	10	6.70153e-12	3.85737	36	311	1911	63681	1.09402e-10
GO:0006796	phosphate-containing compound metabolic process	Biological process	5	8.13971e-12	1.31976	493	12448	1911	63681	1.3124e-10
GO:2000026	regulation of multicellular organismal development	Biological process	5	8.55116e-12	1.80669	144	2656	1911	63681	1.37028e-10
GO:0006275	regulation of DNA replication	Biological process	8	1.43873e-11	2.92512	51	581	1911	63681	2.29144e-10
GO:0090304	nucleic acid metabolic process	Biological process	6	1.78232e-11	1.26013	621	16422	1911	63681	2.82146e-10
GO:0048580	regulation of post-embryonic development	Biological process	6	2.76268e-11	1.83573	131	2378	1911	63681	4.34706e-10
GO:0009987	cellular process	Biological process	2	4.39707e-11	1.07573	1600	49564	1911	63681	6.87734e-10
GO:0006091	generation of precursor metabolites and energy	Biological process	4	6.67141e-11	1.72401	152	2938	1911	63681	1.03725e-09
GO:0006200	obsolete ATP catabolic process	Biological process	0	6.93041e-11	2.27205	75	1100	1911	63681	1.07114e-09
GO:0043412	macromolecule modification	Biological process	5	7.13946e-11	1.29516	506	13019	1911	63681	1.09696e-09
GO:0051276	chromosome organization	Biological process	5	8.04889e-11	1.65005	174	3514	1911	63681	1.22946e-09
GO:0006268	DNA unwinding involved in DNA replication	Biological process	9	1.01911e-10	12.1176	12	33	1911	63681	1.54763e-09
GO:0090567	reproductive shoot system development	Biological process	6	1.12876e-10	1.57354	203	4299	1911	63681	1.70423e-09
GO:0006270	DNA replication initiation	Biological process	8	1.19416e-10	3.92785	31	263	1911	63681	1.79262e-09
GO:1903047	mitotic cell cycle process	Biological process	4	1.22852e-10	2.19014	79	1202	1911	63681	1.83365e-09
GO:0009908	flower development	Biological process	7	1.23724e-10	1.576	201	4250	1911	63681	1.83617e-09
GO:0009642	response to light intensity	Biological process	6	2.69557e-10	2.11823	82	1290	1911	63681	3.97787e-09
GO:0051239	regulation of multicellular organismal process	Biological process	4	3.02444e-10	1.71561	144	2797	1911	63681	4.4381e-09
GO:0018193	peptidyl-amino acid modification	Biological process	8	4.39581e-10	1.80047	122	2258	1911	63681	6.41445e-09
GO:0006084	acetyl-CoA metabolic process	Biological process	7	4.64097e-10	3.13916	39	414	1911	63681	6.73456e-09
GO:0022618	ribonucleoprotein complex assembly	Biological process	7	4.69267e-10	4.64978	24	172	1911	63681	6.77196e-09
GO:0071826	ribonucleoprotein complex subunit organization	Biological process	5	4.69267e-10	4.64978	24	172	1911	63681	6.77196e-09
GO:0044260	cellular macromolecule metabolic process	Biological process	5	4.76565e-10	1.15235	998	28860	1911	63681	6.80212e-09
GO:0042274	ribosomal small subunit biogenesis	Biological process	5	6.78377e-10	6.58718	17	86	1911	63681	9.63e-09
GO:0048229	gametophyte development	Biological process	5	6.95314e-10	1.74961	130	2476	1911	63681	9.81708e-09
GO:0042256	mature ribosome assembly	Biological process	9	7.37426e-10	16.6617	9	18	1911	63681	1.03557e-08
GO:0000302	response to reactive oxygen species	Biological process	5	9.74834e-10	1.95044	94	1606	1911	63681	1.36164e-08
GO:0051052	regulation of DNA metabolic process	Biological process	7	1.66415e-09	2.36592	59	831	1911	63681	2.3121e-08
GO:0008283	cell proliferation	Biological process	3	1.71461e-09	2.1258	74	1160	1911	63681	2.3696e-08
GO:0006637	acyl-CoA metabolic process	Biological process	6	1.78682e-09	2.9945	39	434	1911	63681	2.45641e-08
GO:0035383	thioester metabolic process	Biological process	5	1.78682e-09	2.9945	39	434	1911	63681	2.45641e-08
GO:0043170	macromolecule metabolic process	Biological process	4	1.99804e-09	1.13445	1072	31489	1911	63681	2.71816e-08
GO:1900140	regulation of seedling development	Biological process	7	2.58351e-09	3.05947	37	403	1911	63681	3.49644e-08
GO:0048831	regulation of shoot system development	Biological process	6	2.69741e-09	1.84831	103	1857	1911	63681	3.63177e-08
GO:0006396	RNA processing	Biological process	8	2.76729e-09	1.57809	172	3632	1911	63681	3.70674e-08
GO:0051093	negative regulation of developmental process	Biological process	5	2.94413e-09	2.62785	47	596	1911	63681	3.9235e-08
GO:0051029	rRNA transport	Biological process	9	4.10902e-09	14.2815	9	21	1911	63681	5.4481e-08
GO:0006407	rRNA export from nucleus	Biological process	10	4.10902e-09	14.2815	9	21	1911	63681	5.4481e-08
GO:0009059	macromolecule biosynthetic process	Biological process	5	7.35795e-09	1.2165	621	17011	1911	63681	9.65777e-08
GO:0009909	regulation of flower development	Biological process	7	7.39574e-09	1.86438	95	1698	1911	63681	9.65884e-08
GO:0090332	stomatal closure	Biological process	5	8.51646e-09	4.5441	21	154	1911	63681	1.10672e-07
GO:0071428	rRNA-containing ribonucleoprotein complex export from nucleus	Biological process	12	1.082e-08	13.0396	9	23	1911	63681	1.3991e-07
GO:0050793	regulation of developmental process	Biological process	4	1.47458e-08	1.49979	192	4266	1911	63681	1.89734e-07
GO:0048367	shoot system development	Biological process	5	1.91402e-08	1.39042	268	6423	1911	63681	2.4507e-07
GO:0048581	negative regulation of post-embryonic development	Biological process	7	1.9674e-08	2.8344	37	435	1911	63681	2.50676e-07
GO:0009651	response to salt stress	Biological process	5	2.31087e-08	1.47823	199	4486	1911	63681	2.93009e-07
GO:0010029	regulation of seed germination	Biological process	8	3.11631e-08	2.93522	34	386	1911	63681	3.93227e-07
GO:0006886	intracellular protein transport	Biological process	9	4.16208e-08	1.43738	218	5054	1911	63681	5.22662e-07
GO:0019953	sexual reproduction	Biological process	4	4.29517e-08	1.92678	78	1349	1911	63681	5.36794e-07
GO:0034645	cellular macromolecule biosynthetic process	Biological process	6	5.07437e-08	1.2069	601	16594	1911	63681	6.31156e-07
GO:0051241	negative regulation of multicellular organismal process	Biological process	5	5.49166e-08	2.64149	39	492	1911	63681	6.7982e-07
GO:0090502	RNA phosphodiester bond hydrolysis, endonucleolytic	Biological process	9	8.50306e-08	3.8383	22	191	1911	63681	1.04764e-06
GO:1902410	mitotic cytokinetic process	Biological process	5	9.21656e-08	2.08271	61	976	1911	63681	1.13022e-06
GO:0032506	cytokinetic process	Biological process	4	9.21656e-08	2.08271	61	976	1911	63681	1.13022e-06
GO:0006970	response to osmotic stress	Biological process	4	1.11269e-07	1.43872	204	4725	1911	63681	1.35179e-06
GO:0044703	multi-organism reproductive process	Biological process	3	1.17743e-07	1.87941	78	1383	1911	63681	1.42382e-06
GO:0000281	mitotic cytokinesis	Biological process	6	1.22459e-07	2.05169	62	1007	1911	63681	1.47402e-06
GO:0016070	RNA metabolic process	Biological process	7	1.23214e-07	1.22156	526	14349	1911	63681	1.47631e-06
GO:0005975	carbohydrate metabolic process	Biological process	4	1.32295e-07	1.3324	300	7503	1911	63681	1.57787e-06
GO:0061640	cytoskeleton-dependent cytokinesis	Biological process	5	1.60955e-07	2.03552	62	1015	1911	63681	1.91098e-06
GO:0006414	translational elongation	Biological process	7	1.81152e-07	3.24497	26	267	1911	63681	2.14104e-06
GO:0071277	cellular response to calcium ion	Biological process	7	1.95476e-07	14.579	7	16	1911	63681	2.29992e-06
GO:0015931	nucleobase-containing compound transport	Biological process	6	2.02379e-07	2.17964	52	795	1911	63681	2.37047e-06
GO:0000460	maturation of 5.8S rRNA	Biological process	11	2.14868e-07	9.67453	9	31	1911	63681	2.50552e-06
GO:0000466	maturation of 5.8S rRNA from tricistronic rRNA transcript (SSU-rRNA, 5.8S rRNA, LSU-rRNA)	Biological process	12	2.14868e-07	9.67453	9	31	1911	63681	2.50552e-06
GO:0000911	cytokinesis by cell plate formation	Biological process	6	2.5999e-07	2.048	59	960	1911	63681	3.00484e-06
GO:0070727	cellular macromolecule localization	Biological process	4	2.61743e-07	1.39496	224	5351	1911	63681	3.01177e-06
GO:0034613	cellular protein localization	Biological process	5	2.66289e-07	1.40214	218	5181	1911	63681	3.05064e-06
GO:0046907	intracellular transport	Biological process	5	3.76547e-07	1.37214	238	5780	1911	63681	4.29494e-06
GO:0008152	metabolic process	Biological process	2	6.23238e-07	1.05777	1567	49366	1911	63681	7.07782e-06
GO:0090351	seedling development	Biological process	5	7.73453e-07	1.86784	69	1231	1911	63681	8.74572e-06
GO:0006085	acetyl-CoA biosynthetic process	Biological process	8	8.95333e-07	6.43083	11	57	1911	63681	1.00802e-05
GO:0009628	response to abiotic stimulus	Biological process	3	9.22927e-07	1.21057	499	13736	1911	63681	1.03463e-05
GO:0000910	cytokinesis	Biological process	4	9.24689e-07	1.92074	63	1093	1911	63681	1.03217e-05
GO:0044723	single-organism carbohydrate metabolic process	Biological process	5	1.07843e-06	1.35812	233	5717	1911	63681	1.19867e-05
GO:0031125	rRNA 3'-end processing	Biological process	11	1.17817e-06	9.52097	8	28	1911	63681	1.30397e-05
GO:0009853	photorespiration	Biological process	5	1.20787e-06	2.02187	54	890	1911	63681	1.3312e-05
GO:0032392	DNA geometric change	Biological process	7	1.30929e-06	3.65979	19	173	1911	63681	1.43692e-05
GO:0032508	DNA duplex unwinding	Biological process	8	1.30929e-06	3.65979	19	173	1911	63681	1.43692e-05
GO:0000462	maturation of SSU-rRNA from tricistronic rRNA transcript (SSU-rRNA, 5.8S rRNA, LSU-rRNA)	Biological process	12	1.43759e-06	7.89238	9	38	1911	63681	1.56458e-05
GO:0015833	peptide transport	Biological process	7	1.45808e-06	1.34244	243	6032	1911	63681	1.58029e-05
GO:0015031	protein transport	Biological process	8	1.47449e-06	1.36076	225	5510	1911	63681	1.59148e-05
GO:0034654	nucleobase-containing compound biosynthetic process	Biological process	6	1.58346e-06	1.22952	428	11600	1911	63681	1.70206e-05
GO:0051301	cell division	Biological process	4	1.71055e-06	1.6892	88	1736	1911	63681	1.83112e-05
GO:0090506	axillary shoot meristem initiation	Biological process	5	1.74129e-06	11.1078	7	21	1911	63681	1.85643e-05
GO:0016051	carbohydrate biosynthetic process	Biological process	6	1.82637e-06	1.4218	176	4125	1911	63681	1.93922e-05
GO:0045184	establishment of protein localization	Biological process	5	1.85156e-06	1.35632	225	5528	1911	63681	1.95801e-05
GO:0042886	amide transport	Biological process	6	1.85291e-06	1.3371	244	6081	1911	63681	1.95153e-05
GO:0009664	plant-type cell wall organization	Biological process	6	2.01933e-06	1.64539	95	1924	1911	63681	2.11827e-05
GO:0030490	maturation of SSU-rRNA	Biological process	11	2.28458e-06	7.49776	9	40	1911	63681	2.38693e-05
GO:0000028	ribosomal small subunit assembly	Biological process	8	2.48747e-06	10.6029	7	22	1911	63681	2.58855e-05
GO:0000447	endonucleolytic cleavage in ITS1 to separate SSU-rRNA from 5.8S rRNA and LSU-rRNA from tricistronic rRNA transcript (SSU-rRNA, 5.8S rRNA, LSU-rRNA)	Biological process	12	2.48747e-06	10.6029	7	22	1911	63681	2.58855e-05
GO:0000461	endonucleolytic cleavage to generate mature 3'-end of SSU-rRNA from (SSU-rRNA, 5.8S rRNA, LSU-rRNA)	Biological process	12	2.48747e-06	10.6029	7	22	1911	63681	2.58855e-05
GO:0000479	endonucleolytic cleavage of tricistronic rRNA transcript (SSU-rRNA, 5.8S rRNA, LSU-rRNA)	Biological process	11	2.48747e-06	10.6029	7	22	1911	63681	2.58855e-05
GO:0080057	sepal vascular tissue pattern formation	Biological process	7	2.75794e-06	18.513	5	9	1911	63681	2.82499e-05
GO:0080056	petal vascular tissue pattern formation	Biological process	7	2.75794e-06	18.513	5	9	1911	63681	2.82499e-05
GO:0009845	seed germination	Biological process	4	2.91107e-06	1.83406	65	1181	1911	63681	2.95864e-05
GO:0009791	post-embryonic development	Biological process	4	3.93892e-06	1.23893	378	10167	1911	63681	3.98777e-05
GO:0045493	xylan catabolic process	Biological process	10	4.60479e-06	8.0784	8	33	1911	63681	4.6439e-05
GO:2000032	regulation of secondary shoot formation	Biological process	8	4.78909e-06	9.71932	7	24	1911	63681	4.8112e-05
GO:0060688	regulation of morphogenesis of a branching structure	Biological process	6	4.78909e-06	9.71932	7	24	1911	63681	4.8112e-05
GO:0071616	acyl-CoA biosynthetic process	Biological process	7	5.50059e-06	5.39055	11	68	1911	63681	5.48379e-05
GO:0035384	thioester biosynthetic process	Biological process	6	5.50059e-06	5.39055	11	68	1911	63681	5.48379e-05
GO:0006305	DNA alkylation	Biological process	9	5.80594e-06	2.07681	44	706	1911	63681	5.74437e-05
GO:0006306	DNA methylation	Biological process	10	5.80594e-06	2.07681	44	706	1911	63681	5.74437e-05
GO:0009416	response to light stimulus	Biological process	5	6.1745e-06	1.33656	221	5510	1911	63681	6.06309e-05
GO:1901362	organic cyclic compound biosynthetic process	Biological process	5	6.78575e-06	1.17817	542	15330	1911	63681	6.63834e-05
GO:0006304	DNA modification	Biological process	8	7.42075e-06	2.05642	44	713	1911	63681	7.23246e-05
GO:0044728	DNA methylation or demethylation	Biological process	9	7.42075e-06	2.05642	44	713	1911	63681	7.23246e-05
GO:0016126	sterol biosynthetic process	Biological process	7	7.6453e-06	2.07367	43	691	1911	63681	7.39612e-05
GO:0008104	protein localization	Biological process	4	7.68538e-06	1.32327	230	5792	1911	63681	7.40746e-05
GO:0051649	establishment of localization in cell	Biological process	4	7.69332e-06	1.31233	242	6145	1911	63681	7.38785e-05
GO:0070925	organelle assembly	Biological process	5	8.06154e-06	2.77695	24	288	1911	63681	7.71309e-05
GO:0006259	DNA metabolic process	Biological process	7	8.45242e-06	1.43686	146	3386	1911	63681	8.05756e-05
GO:0007030	Golgi organization	Biological process	5	9.09025e-06	1.8495	57	1027	1911	63681	8.63408e-05
GO:0009314	response to radiation	Biological process	4	9.37738e-06	1.32025	229	5780	1911	63681	8.87453e-05
GO:0006525	arginine metabolic process	Biological process	11	9.51624e-06	5.64803	10	59	1911	63681	8.97344e-05
GO:0071248	cellular response to metal ion	Biological process	6	9.70256e-06	2.89769	22	253	1911	63681	9.11622e-05
GO:0018130	heterocycle biosynthetic process	Biological process	5	1.04448e-05	1.19173	475	13282	1911	63681	9.77847e-05
GO:0048609	multicellular organismal reproductive process	Biological process	3	1.22166e-05	1.59527	90	1880	1911	63681	0.000113964
GO:0043094	cellular metabolic compound salvage	Biological process	4	1.25941e-05	1.8513	55	990	1911	63681	0.000117067
GO:2000241	regulation of reproductive process	Biological process	4	1.50188e-05	1.56051	96	2050	1911	63681	0.00013911
GO:0090501	RNA phosphodiester bond hydrolysis	Biological process	8	1.55293e-05	2.73728	23	280	1911	63681	0.000143331
GO:0032504	multicellular organism reproduction	Biological process	3	1.58979e-05	1.57074	93	1973	1911	63681	0.000146216
GO:0016125	sterol metabolic process	Biological process	6	1.62503e-05	2.00969	43	713	1911	63681	0.000148933
GO:0006526	arginine biosynthetic process	Biological process	12	1.73881e-05	6.83557	8	39	1911	63681	0.000158803
GO:0044283	small molecule biosynthetic process	Biological process	5	1.93345e-05	1.28739	251	6497	1911	63681	0.000175964
GO:0006269	DNA replication, synthesis of RNA primer	Biological process	9	1.95522e-05	9.99702	6	20	1911	63681	0.000177328
GO:0043628	ncRNA 3'-end processing	Biological process	10	2.1164e-05	6.66468	8	40	1911	63681	0.000191281
GO:0033036	macromolecule localization	Biological process	3	2.18871e-05	1.27412	266	6957	1911	63681	0.000197135
GO:0010229	inflorescence development	Biological process	7	2.29216e-05	3.76232	14	124	1911	63681	0.000205743
GO:0044765	single-organism transport	Biological process	5	2.39213e-05	1.27387	264	6906	1911	63681	0.000213981
GO:0071555	cell wall organization	Biological process	5	2.46517e-05	1.43467	132	3066	1911	63681	0.000219762
GO:0031554	regulation of DNA-templated transcription, termination	Biological process	11	2.54735e-05	12.8167	5	13	1911	63681	0.000226316
GO:0031555	transcriptional attenuation	Biological process	12	2.54735e-05	12.8167	5	13	1911	63681	0.000226316
GO:0031564	transcription antitermination	Biological process	13	2.54735e-05	12.8167	5	13	1911	63681	0.000226316
GO:0000278	mitotic cell cycle	Biological process	5	2.65452e-05	1.56203	90	1920	1911	63681	0.000233454
GO:0044707	single-multicellular organism process	Biological process	3	2.68947e-05	1.15877	565	16248	1911	63681	0.000235734
GO:0090329	regulation of DNA-dependent DNA replication	Biological process	9	2.74707e-05	3.7026	14	126	1911	63681	0.000239978
GO:0071731	response to nitric oxide	Biological process	6	2.84491e-05	3.33234	16	160	1911	63681	0.000247697
GO:0061458	reproductive system development	Biological process	5	3.02603e-05	1.24952	296	7894	1911	63681	0.000262591
GO:0048608	reproductive structure development	Biological process	4	3.02603e-05	1.24952	296	7894	1911	63681	0.000262591
GO:0006979	response to oxidative stress	Biological process	4	3.12063e-05	1.46353	117	2664	1911	63681	0.000269012
GO:0007275	multicellular organism development	Biological process	4	3.13416e-05	1.16067	549	15762	1911	63681	0.00026929
GO:0071103	DNA conformation change	Biological process	6	3.19959e-05	2.1499	34	527	1911	63681	0.000274011
GO:1900618	regulation of shoot system morphogenesis	Biological process	7	3.77446e-05	7.28949	7	32	1911	63681	0.000322186
GO:1905428	regulation of plant organ formation	Biological process	6	3.77446e-05	7.28949	7	32	1911	63681	0.000322186
GO:0000959	mitochondrial RNA metabolic process	Biological process	8	4.11285e-05	5.35554	9	56	1911	63681	0.000348791
GO:0009409	response to cold	Biological process	5	4.33092e-05	1.40459	138	3274	1911	63681	0.000366096
GO:1902578	single-organism localization	Biological process	3	4.65519e-05	1.26145	264	6974	1911	63681	0.000392237
GO:0044702	single organism reproductive process	Biological process	3	4.71383e-05	1.21457	353	9685	1911	63681	0.000395902
GO:0042044	fluid transport	Biological process	6	5.1505e-05	1.83853	48	870	1911	63681	0.00043119
GO:0006833	water transport	Biological process	7	5.1505e-05	1.83853	48	870	1911	63681	0.00043119
GO:0046040	IMP metabolic process	Biological process	11	5.19328e-05	5.92416	8	45	1911	63681	0.000432002
GO:0042787	protein ubiquitination involved in ubiquitin-dependent protein catabolic process	Biological process	11	5.19328e-05	5.92416	8	45	1911	63681	0.000432002
GO:0006188	IMP biosynthetic process	Biological process	12	5.19328e-05	5.92416	8	45	1911	63681	0.000432002
GO:0042545	cell wall modification	Biological process	6	5.78846e-05	1.5495	85	1828	1911	63681	0.000476955
GO:0010564	regulation of cell cycle process	Biological process	6	6.0699e-05	1.96911	39	660	1911	63681	0.000498572
GO:0071241	cellular response to inorganic substance	Biological process	5	6.99602e-05	2.54554	22	288	1911	63681	0.00057284
GO:0009124	nucleoside monophosphate biosynthetic process	Biological process	9	8.37829e-05	2.40169	24	333	1911	63681	0.000683878
GO:0000724	double-strand break repair via homologous recombination	Biological process	10	9.1893e-05	2.63426	20	253	1911	63681	0.00074774
GO:0000725	recombinational repair	Biological process	9	9.1893e-05	2.63426	20	253	1911	63681	0.00074774
GO:1900864	mitochondrial RNA modification	Biological process	9	9.77057e-05	5.44055	8	49	1911	63681	0.000790115
GO:0006353	DNA-templated transcription, termination	Biological process	9	9.952e-05	7.69001	6	26	1911	63681	0.000802303
GO:0006563	L-serine metabolic process	Biological process	11	0.000110256	3.66863	12	109	1911	63681	0.000886119
GO:0009064	glutamine family amino acid metabolic process	Biological process	10	0.000126305	2.57323	20	259	1911	63681	0.00101199
GO:0006310	DNA recombination	Biological process	8	0.000136339	1.72077	52	1007	1911	63681	0.00108904
GO:0009084	glutamine family amino acid biosynthetic process	Biological process	11	0.000143635	3.35817	13	129	1911	63681	0.00114382
GO:0006184	obsolete GTP catabolic process	Biological process	0	0.000146487	2.15486	28	433	1911	63681	0.00116299
GO:0022402	cell cycle process	Biological process	3	0.000146554	1.4232	111	2599	1911	63681	0.00116
GO:0006302	double-strand break repair	Biological process	9	0.000153657	2.18381	27	412	1911	63681	0.00121254
GO:0006564	L-serine biosynthetic process	Biological process	12	0.0001547	7.14073	6	28	1911	63681	0.00121709
GO:0010948	negative regulation of cell cycle process	Biological process	7	0.000172808	4.47628	9	67	1911	63681	0.00135548
GO:0052541	plant-type cell wall cellulose metabolic process	Biological process	10	0.000179758	2.9753	15	168	1911	63681	0.00140578
GO:0071669	plant-type cell wall organization or biogenesis	Biological process	4	0.000205201	1.42056	107	2510	1911	63681	0.00159995
GO:1901575	organic substance catabolic process	Biological process	4	0.000220958	1.22559	274	7450	1911	63681	0.00171769
GO:0044710	single-organism metabolic process	Biological process	3	0.000230766	1.1009	810	24518	1911	63681	0.0017886
GO:0010256	endomembrane system organization	Biological process	4	0.000260809	1.63182	57	1164	1911	63681	0.00200953
GO:0003006	developmental process involved in reproduction	Biological process	3	0.000266334	1.18842	350	9814	1911	63681	0.00204607
GO:0006354	DNA-templated transcription, elongation	Biological process	9	0.000270143	2.22156	24	360	1911	63681	0.00206925
GO:0051726	regulation of cell cycle	Biological process	5	0.000286695	1.60337	60	1247	1911	63681	0.00218961
GO:0045229	external encapsulating structure organization	Biological process	4	0.000315444	1.34823	134	3312	1911	63681	0.00240216
GO:0044712	single-organism catabolic process	Biological process	4	0.000340958	1.26568	201	5292	1911	63681	0.0025889
GO:0019438	aromatic compound biosynthetic process	Biological process	5	0.000343504	1.145	493	14348	1911	63681	0.00260068
GO:0051641	cellular localization	Biological process	3	0.000351331	1.23107	248	6713	1911	63681	0.00265225
GO:0034976	response to endoplasmic reticulum stress	Biological process	5	0.000357475	1.47198	83	1879	1911	63681	0.00269085
GO:0016458	gene silencing	Biological process	8	0.000372216	1.49441	77	1717	1911	63681	0.00279376
GO:0009163	nucleoside biosynthetic process	Biological process	8	0.000397399	3.0294	13	143	1911	63681	0.00297423
GO:0042455	ribonucleoside biosynthetic process	Biological process	9	0.000397399	3.0294	13	143	1911	63681	0.00297423
GO:0090151	establishment of protein localization to mitochondrial membrane	Biological process	9	0.000416083	7.5735	5	22	1911	63681	0.00309632
GO:0050821	protein stabilization	Biological process	5	0.000473586	5.8806	6	34	1911	63681	0.00351423
GO:0042273	ribosomal large subunit biogenesis	Biological process	5	0.000518569	7.24422	5	23	1911	63681	0.00383712
GO:0044763	single-organism cellular process	Biological process	3	0.00052948	1.08017	955	29462	1911	63681	0.00390679
GO:0007000	nucleolus organization	Biological process	6	0.000532711	3.09985	12	129	1911	63681	0.00391955
GO:0009411	response to UV	Biological process	6	0.000534491	1.57035	59	1252	1911	63681	0.0039216
GO:1901990	regulation of mitotic cell cycle phase transition	Biological process	8	0.000558259	2.19495	22	334	1911	63681	0.00408451
GO:1901987	regulation of cell cycle phase transition	Biological process	7	0.000558259	2.19495	22	334	1911	63681	0.00408451
GO:0048481	plant ovule development	Biological process	5	0.000610418	1.72726	41	791	1911	63681	0.00444126
GO:0009790	embryo development	Biological process	5	0.000631884	1.34867	120	2965	1911	63681	0.00458467
GO:0051131	chaperone-mediated protein complex assembly	Biological process	8	0.000638916	6.94237	5	24	1911	63681	0.00462285
GO:0006954	inflammatory response	Biological process	5	0.000638916	6.94237	5	24	1911	63681	0.00462285
GO:0046129	purine ribonucleoside biosynthetic process	Biological process	10	0.00064492	4.16542	8	64	1911	63681	0.00464058
GO:0042451	purine nucleoside biosynthetic process	Biological process	9	0.00064492	4.16542	8	64	1911	63681	0.00464058
GO:0031647	regulation of protein stability	Biological process	4	0.000651718	5.5539	6	36	1911	63681	0.0046638
GO:0051592	response to calcium ion	Biological process	6	0.000662271	3.74888	9	80	1911	63681	0.00472637
GO:0007346	regulation of mitotic cell cycle	Biological process	6	0.000662894	1.9602	28	476	1911	63681	0.00471793
GO:0006108	malate metabolic process	Biological process	9	0.000700077	4.66527	7	50	1911	63681	0.00496902
GO:0071732	cellular response to nitric oxide	Biological process	7	0.000710436	2.85003	13	152	1911	63681	0.00502889
GO:0043436	oxoacid metabolic process	Biological process	6	0.000728124	1.17482	340	9644	1911	63681	0.00514016
GO:0006082	organic acid metabolic process	Biological process	5	0.000738204	1.17458	340	9646	1911	63681	0.00519727
GO:0035999	tetrahydrofolate interconversion	Biological process	10	0.000758254	5.40379	6	37	1911	63681	0.00532408
GO:0035670	plant-type ovary development	Biological process	5	0.000777053	1.70569	41	801	1911	63681	0.00544145
GO:0007006	mitochondrial membrane organization	Biological process	6	0.000779008	6.66468	5	25	1911	63681	0.00544056
GO:0006790	sulfur compound metabolic process	Biological process	4	0.0007922	1.3109	138	3508	1911	63681	0.00551794
GO:0043648	dicarboxylic acid metabolic process	Biological process	8	0.000858633	2.40041	17	236	1911	63681	0.00596476
GO:0006694	steroid biosynthetic process	Biological process	6	0.000860226	1.61348	49	1012	1911	63681	0.00595997
GO:0000338	protein deneddylation	Biological process	10	0.000872331	1.9517	27	461	1911	63681	0.00602785
GO:2000022	regulation of jasmonic acid mediated signaling pathway	Biological process	7	0.000877749	5.26159	6	38	1911	63681	0.00604929
GO:0001522	pseudouridine synthesis	Biological process	9	0.000878128	3.97891	8	67	1911	63681	0.00603597
GO:0071702	organic substance transport	Biological process	5	0.000931141	1.18438	302	8497	1911	63681	0.00631724
GO:0019752	carboxylic acid metabolic process	Biological process	7	0.000938854	1.17621	323	9151	1911	63681	0.00635308
GO:0090305	nucleic acid phosphodiester bond hydrolysis	Biological process	7	0.000997487	1.66038	43	863	1911	63681	0.00673239
GO:0032875	regulation of DNA endoreduplication	Biological process	10	0.00100951	3.267	10	102	1911	63681	0.00679598
GO:0051053	negative regulation of DNA metabolic process	Biological process	8	0.00102928	3.52836	9	85	1911	63681	0.00691128
GO:0044770	cell cycle phase transition	Biological process	4	0.00102966	2.09461	22	350	1911	63681	0.00689608
GO:0044772	mitotic cell cycle phase transition	Biological process	5	0.00102966	2.09461	22	350	1911	63681	0.00689608
GO:1901070	guanosine-containing compound biosynthetic process	Biological process	11	0.00112626	6.171	5	27	1911	63681	0.0075046
GO:0009127	purine nucleoside monophosphate biosynthetic process	Biological process	10	0.0011305	2.3409	17	242	1911	63681	0.00751366
GO:0009168	purine ribonucleoside monophosphate biosynthetic process	Biological process	11	0.0011305	2.3409	17	242	1911	63681	0.00751366
GO:0009156	ribonucleoside monophosphate biosynthetic process	Biological process	10	0.00115371	2.16386	20	308	1911	63681	0.00762908
GO:1902749	regulation of cell cycle G2/M phase transition	Biological process	8	0.00115371	2.16386	20	308	1911	63681	0.00762908
GO:0010389	regulation of G2/M transition of mitotic cell cycle	Biological process	9	0.00115371	2.16386	20	308	1911	63681	0.00762908
GO:0080156	mitochondrial mRNA modification	Biological process	10	0.00115976	4.99851	6	40	1911	63681	0.00761129
GO:0000086	G2/M transition of mitotic cell cycle	Biological process	6	0.00129577	2.14298	20	311	1911	63681	0.00848261
GO:0044839	cell cycle G2/M phase transition	Biological process	5	0.00129577	2.14298	20	311	1911	63681	0.00848261
GO:0006542	glutamine biosynthetic process	Biological process	12	0.00133747	5.95061	5	28	1911	63681	0.00871192
GO:0034605	cellular response to heat	Biological process	6	0.00142873	3.36978	9	89	1911	63681	0.00928322
GO:2000104	negative regulation of DNA-dependent DNA replication	Biological process	10	0.00150635	4.76048	6	42	1911	63681	0.00976323
GO:0008156	negative regulation of DNA replication	Biological process	9	0.00150635	4.76048	6	42	1911	63681	0.00976323
GO:0009793	embryo development ending in seed dormancy	Biological process	6	0.00154593	1.34483	104	2577	1911	63681	0.0099703
GO:0009749	response to glucose	Biological process	8	0.00170756	1.8628	27	483	1911	63681	0.0109856
GO:0009085	lysine biosynthetic process	Biological process	12	0.00192657	4.5441	6	44	1911	63681	0.0123338
GO:0009089	lysine biosynthetic process via diaminopimelate	Biological process	13	0.00192657	4.5441	6	44	1911	63681	0.0123338
GO:0046451	diaminopimelate metabolic process	Biological process	9	0.00192657	4.5441	6	44	1911	63681	0.0123338
GO:1902170	cellular response to reactive nitrogen species	Biological process	6	0.00197071	2.54826	13	170	1911	63681	0.0125243
GO:0051603	proteolysis involved in cellular protein catabolic process	Biological process	7	0.00216857	1.36483	89	2173	1911	63681	0.0136161
GO:0032501	multicellular organismal process	Biological process	2	0.00227712	1.10606	578	17414	1911	63681	0.0142634
GO:1905393	plant organ formation	Biological process	4	0.00233558	1.53607	49	1063	1911	63681	0.0145946
GO:0000375	RNA splicing, via transesterification reactions	Biological process	10	0.00233686	1.82132	27	494	1911	63681	0.0145678
GO:0000377	RNA splicing, via transesterification reactions with bulged adenosine as nucleophile	Biological process	11	0.00233686	1.82132	27	494	1911	63681	0.0145678
GO:0048438	floral whorl development	Biological process	4	0.00240043	1.35983	89	2181	1911	63681	0.0148929
GO:0048827	phyllome development	Biological process	5	0.00259404	1.25451	151	4011	1911	63681	0.016056
GO:0046653	tetrahydrofolate metabolic process	Biological process	9	0.00276916	3.7026	7	63	1911	63681	0.016979
GO:0006541	glutamine metabolic process	Biological process	11	0.00278638	3.06031	9	98	1911	63681	0.0170446
GO:0032876	negative regulation of DNA endoreduplication	Biological process	11	0.0028536	5.049	5	33	1911	63681	0.0174149
GO:0048825	cotyledon development	Biological process	7	0.00294823	1.86425	24	429	1911	63681	0.0179505
GO:0032787	monocarboxylic acid metabolic process	Biological process	8	0.00296769	1.18904	235	6586	1911	63681	0.018027
GO:0006342	chromatin silencing	Biological process	12	0.00317418	1.51189	49	1080	1911	63681	0.0192366
GO:0016444	somatic cell DNA recombination	Biological process	9	0.00319934	2.80028	10	119	1911	63681	0.0193441
GO:0009152	purine ribonucleotide biosynthetic process	Biological process	11	0.00320529	2.02283	19	313	1911	63681	0.0193354
GO:1901659	glycosyl compound biosynthetic process	Biological process	6	0.00323516	1.51757	48	1054	1911	63681	0.0194258
GO:0009631	cold acclimation	Biological process	6	0.00325894	2.6371	11	139	1911	63681	0.0195237
GO:0030433	ubiquitin-dependent ERAD pathway	Biological process	11	0.00326394	4.9005	5	34	1911	63681	0.019509
GO:0036503	ERAD pathway	Biological process	7	0.00326394	4.9005	5	34	1911	63681	0.019509
GO:0048437	floral organ development	Biological process	5	0.00348755	1.31286	102	2589	1911	63681	0.0207505
GO:0000103	sulfate assimilation	Biological process	5	0.00349014	3.21189	8	83	1911	63681	0.0207188
GO:0009119	ribonucleoside metabolic process	Biological process	8	0.00349647	2.29816	14	203	1911	63681	0.0207093
GO:0045786	negative regulation of cell cycle	Biological process	6	0.00352399	2.22156	15	225	1911	63681	0.020825
GO:0044257	cellular protein catabolic process	Biological process	7	0.00352485	1.33587	91	2270	1911	63681	0.0207831
GO:0045488	pectin metabolic process	Biological process	7	0.00358697	1.78641	26	485	1911	63681	0.0211017
GO:0010393	galacturonan metabolic process	Biological process	6	0.00358697	1.78641	26	485	1911	63681	0.0211017
GO:0045814	negative regulation of gene expression, epigenetic	Biological process	8	0.00365148	1.50078	49	1088	1911	63681	0.0213849
GO:0010453	regulation of cell fate commitment	Biological process	6	0.00371508	4.76048	5	35	1911	63681	0.0217087
GO:0006553	lysine metabolic process	Biological process	11	0.00372504	3.99881	6	50	1911	63681	0.0216218
GO:0010223	secondary shoot formation	Biological process	6	0.00375804	3.17366	8	84	1911	63681	0.021765
GO:0010346	shoot axis formation	Biological process	5	0.00375804	3.17366	8	84	1911	63681	0.021765
GO:0006544	glycine metabolic process	Biological process	11	0.00383602	2.03329	18	295	1911	63681	0.0221185
GO:0009056	catabolic process	Biological process	3	0.0038407	1.1557	301	8679	1911	63681	0.0220482
GO:0048467	gynoecium development	Biological process	5	0.00384559	1.46536	54	1228	1911	63681	0.0220278
GO:0008202	steroid metabolic process	Biological process	5	0.00423581	1.48236	50	1124	1911	63681	0.0242099
GO:0006446	regulation of translational initiation	Biological process	9	0.00429448	2.68737	10	124	1911	63681	0.0244917
GO:0000398	mRNA splicing, via spliceosome	Biological process	12	0.00430549	1.78391	25	467	1911	63681	0.0245009
GO:0000075	cell cycle checkpoint	Biological process	7	0.00453708	3.84501	6	52	1911	63681	0.0257627
GO:0061727	methylglyoxal catabolic process to lactate	Biological process	10	0.00453722	1.88623	21	371	1911	63681	0.0257076
GO:0019243	methylglyoxal catabolic process to D-lactate via S-lactoyl-glutathione	Biological process	11	0.00453722	1.88623	21	371	1911	63681	0.0257076
GO:0006413	translational initiation	Biological process	4	0.00464593	1.8513	22	396	1911	63681	0.0262099
GO:0042182	ketone catabolic process	Biological process	6	0.00496542	1.8711	21	374	1911	63681	0.027713
GO:0009438	methylglyoxal metabolic process	Biological process	6	0.00496542	1.8711	21	374	1911	63681	0.027713
GO:0051596	methylglyoxal catabolic process	Biological process	7	0.00496542	1.8711	21	374	1911	63681	0.027713
GO:1901068	guanosine-containing compound metabolic process	Biological process	10	0.0049887	3.77246	6	53	1911	63681	0.0276656
GO:0009147	pyrimidine nucleoside triphosphate metabolic process	Biological process	9	0.00501003	3.33234	7	70	1911	63681	0.027725
GO:0052546	cell wall pectin metabolic process	Biological process	8	0.00511064	2.07461	16	257	1911	63681	0.028222
GO:0048316	seed development	Biological process	5	0.00511848	1.2573	127	3366	1911	63681	0.0282056
GO:0006281	DNA repair	Biological process	8	0.00528503	1.45879	51	1165	1911	63681	0.0287594
GO:0016129	phytosteroid biosynthetic process	Biological process	7	0.00529879	1.66063	30	602	1911	63681	0.0287743
GO:0016132	brassinosteroid biosynthetic process	Biological process	8	0.00529879	1.66063	30	602	1911	63681	0.0287743
GO:0010073	meristem maintenance	Biological process	4	0.00530851	1.41648	59	1388	1911	63681	0.0287077
GO:0006974	cellular response to DNA damage stimulus	Biological process	5	0.00531035	1.42114	58	1360	1911	63681	0.0286583
GO:0045930	negative regulation of mitotic cell cycle	Biological process	7	0.00533483	4.38466	5	38	1911	63681	0.028672
GO:0031123	RNA 3'-end processing	Biological process	9	0.00534354	2.99536	8	89	1911	63681	0.0286598
GO:0009060	aerobic respiration	Biological process	7	0.00545669	1.88801	20	353	1911	63681	0.0292067
GO:0010498	proteasomal protein catabolic process	Biological process	8	0.00549539	1.48823	46	1030	1911	63681	0.0293537
GO:0045333	cellular respiration	Biological process	6	0.00586708	1.68118	28	555	1911	63681	0.0312751
GO:0046185	aldehyde catabolic process	Biological process	5	0.00592225	1.84156	21	380	1911	63681	0.0315049
GO:0046128	purine ribonucleoside metabolic process	Biological process	9	0.00598949	2.72646	9	110	1911	63681	0.0317979
GO:2000031	regulation of salicylic acid mediated signaling pathway	Biological process	7	0.00598957	3.63528	6	55	1911	63681	0.0317338
GO:0044767	single-organism developmental process	Biological process	3	0.0061407	1.09103	593	18112	1911	63681	0.0324687
GO:0034599	cellular response to oxidative stress	Biological process	5	0.00615513	1.86686	20	357	1911	63681	0.0324792
GO:0071554	cell wall organization or biogenesis	Biological process	3	0.00616341	1.2084	170	4688	1911	63681	0.032327
GO:0006089	lactate metabolic process	Biological process	9	0.00627299	1.83191	21	382	1911	63681	0.0324457
GO:0006399	tRNA metabolic process	Biological process	9	0.00633781	1.62425	31	636	1911	63681	0.0327161
GO:0001731	formation of translation preinitiation complex	Biological process	8	0.00678683	3.15221	7	74	1911	63681	0.0349649
GO:0002183	cytoplasmic translational initiation	Biological process	5	0.00678683	3.15221	7	74	1911	63681	0.0349649
GO:0071281	cellular response to iron ion	Biological process	7	0.00686732	2.19901	13	197	1911	63681	0.0352406
GO:0035266	meristem growth	Biological process	5	0.00692331	1.5147	40	880	1911	63681	0.0354582
GO:0001763	morphogenesis of a branching structure	Biological process	4	0.00694337	2.86653	8	93	1911	63681	0.0354913
GO:0030163	protein catabolic process	Biological process	6	0.00735175	1.29868	91	2335	1911	63681	0.0375054
GO:0006002	fructose 6-phosphate metabolic process	Biological process	6	0.00739869	4.06383	5	41	1911	63681	0.0376713
GO:0006760	folic acid-containing compound metabolic process	Biological process	8	0.00752583	2.63079	9	114	1911	63681	0.0382441
GO:0022414	reproductive process	Biological process	2	0.0078107	1.12316	366	10859	1911	63681	0.0388601
GO:0015980	energy derivation by oxidation of organic compounds	Biological process	5	0.00807764	1.62417	29	595	1911	63681	0.0401118
GO:1903311	regulation of mRNA metabolic process	Biological process	8	0.00819495	3.96707	5	42	1911	63681	0.0406171
GO:0042278	purine nucleoside metabolic process	Biological process	8	0.00839848	2.58544	9	116	1911	63681	0.041547
GO:0010588	cotyledon vascular tissue pattern formation	Biological process	7	0.00841764	3.38882	6	59	1911	63681	0.0415631
GO:0000003	reproduction	Biological process	2	0.00861276	1.1212	366	10878	1911	63681	0.0422074
GO:0045596	negative regulation of cell differentiation	Biological process	6	0.0088806	2.74832	8	97	1911	63681	0.0434384
GO:0009116	nucleoside metabolic process	Biological process	7	0.00906717	1.9994	15	250	1911	63681	0.0442681
GO:0009108	coenzyme biosynthetic process	Biological process	6	0.00914247	1.56816	32	680	1911	63681	0.0445525
GO:1901605	alpha-amino acid metabolic process	Biological process	9	0.00914959	1.26437	104	2741	1911	63681	0.0445041
GO:0010305	leaf vascular tissue pattern formation	Biological process	7	0.00934584	2.54161	9	118	1911	63681	0.0452062
GO:0010154	fruit development	Biological process	5	0.0094657	1.22996	129	3495	1911	63681	0.0452828
GO:0009640	photomorphogenesis	Biological process	7	0.00990349	1.41987	49	1150	1911	63681	0.0472905
GO:0009615	response to virus	Biological process	6	0.0101031	1.49503	38	847	1911	63681	0.0481556
GO:0010118	stomatal movement	Biological process	4	0.0101394	1.54448	33	712	1911	63681	0.0482407
GO:0010411	xyloglucan metabolic process	Biological process	9	0.0102746	2.9158	7	80	1911	63681	0.0487949
GO:0042558	pteridine-containing compound metabolic process	Biological process	5	0.0109153	2.4786	9	121	1911	63681	0.0516501
GO:0048731	system development	Biological process	4	0.011118	1.10894	402	12080	1911	63681	0.0525139
GO:0048856	anatomical structure development	Biological process	3	0.0111327	1.08287	591	18187	1911	63681	0.0524885
GO:0006101	citrate metabolic process	Biological process	9	0.0112852	2.1384	12	187	1911	63681	0.0522643
GO:0010197	polar nucleus fusion	Biological process	7	0.0118375	2.6136	8	102	1911	63681	0.0547247
GO:0009292	genetic transfer	Biological process	4	0.0124285	2.29816	10	145	1911	63681	0.0573555
GO:0009294	DNA mediated transformation	Biological process	5	0.0124285	2.29816	10	145	1911	63681	0.0573555
GO:0016572	histone phosphorylation	Biological process	9	0.0125057	1.83928	17	308	1911	63681	0.057307
GO:0051553	flavone biosynthetic process	Biological process	6	0.0132752	3.07601	6	65	1911	63681	0.0607267
GO:0051555	flavonol biosynthetic process	Biological process	7	0.0132752	3.07601	6	65	1911	63681	0.0607267
GO:0016128	phytosteroid metabolic process	Biological process	6	0.0133697	1.54753	30	646	1911	63681	0.0609453
GO:0016131	brassinosteroid metabolic process	Biological process	7	0.0133697	1.54753	30	646	1911	63681	0.0609453
GO:0042335	cuticle development	Biological process	4	0.0141109	2.00557	13	216	1911	63681	0.0638782
GO:0044764	multi-organism cellular process	Biological process	3	0.0141845	2.25158	10	148	1911	63681	0.0641003
GO:0009720	detection of hormone stimulus	Biological process	6	0.0142441	3.47119	5	48	1911	63681	0.0642582
GO:0009726	detection of endogenous stimulus	Biological process	4	0.0142441	3.47119	5	48	1911	63681	0.0642582
GO:0007049	cell cycle	Biological process	4	0.0145093	1.21402	127	3486	1911	63681	0.0652293
GO:0048449	floral organ formation	Biological process	5	0.0146127	1.49275	34	759	1911	63681	0.0655813
GO:0006473	protein acetylation	Biological process	9	0.0151253	1.98717	13	218	1911	63681	0.0675337
GO:0032502	developmental process	Biological process	2	0.0154016	1.07727	599	18529	1911	63681	0.0686501
GO:0071705	nitrogen compound transport	Biological process	5	0.0159123	1.12688	287	8487	1911	63681	0.0703263
GO:0048440	carpel development	Biological process	6	0.0166371	1.38128	48	1158	1911	63681	0.0732819
GO:0006265	DNA topological change	Biological process	8	0.0167868	3.33234	5	50	1911	63681	0.0738169
GO:0048658	anther wall tapetum development	Biological process	4	0.0167868	3.33234	5	50	1911	63681	0.0738169
GO:0009559	embryo sac central cell differentiation	Biological process	6	0.0171144	2.44575	8	109	1911	63681	0.0747537
GO:0010224	response to UV-B	Biological process	7	0.0173976	1.58381	25	526	1911	63681	0.0758641
GO:0034614	cellular response to reactive oxygen species	Biological process	6	0.0174642	1.80737	16	295	1911	63681	0.0760275
GO:0010075	regulation of meristem growth	Biological process	6	0.0181905	1.4506	36	827	1911	63681	0.0790577
GO:0048444	floral organ morphogenesis	Biological process	6	0.0183144	1.43408	38	883	1911	63681	0.0793321
GO:0006397	mRNA processing	Biological process	9	0.0193243	1.49066	31	693	1911	63681	0.083568
GO:0008652	cellular amino acid biosynthetic process	Biological process	9	0.0193723	1.25918	84	2223	1911	63681	0.0836372
GO:0009082	branched-chain amino acid biosynthetic process	Biological process	10	0.0198156	2.81606	6	71	1911	63681	0.0854097
GO:0006520	cellular amino acid metabolic process	Biological process	8	0.019995	1.19991	127	3527	1911	63681	0.0860412
GO:0009069	serine family amino acid metabolic process	Biological process	10	0.0202064	1.34205	53	1316	1911	63681	0.0863815
GO:0072350	tricarboxylic acid metabolic process	Biological process	8	0.0209789	1.9602	12	204	1911	63681	0.0895373
GO:0042126	nitrate metabolic process	Biological process	7	0.0211372	3.14372	5	53	1911	63681	0.0893372
GO:0042128	nitrate assimilation	Biological process	8	0.0211372	3.14372	5	53	1911	63681	0.0893372
GO:0010074	maintenance of meristem identity	Biological process	5	0.021146	1.80452	15	277	1911	63681	0.0890863
GO:0010252	auxin homeostasis	Biological process	6	0.0217966	2.33848	8	114	1911	63681	0.0916792
GO:0090696	post-embryonic plant organ development	Biological process	5	0.0218907	1.29805	64	1643	1911	63681	0.0919269
GO:0051552	flavone metabolic process	Biological process	5	0.022409	2.73891	6	73	1911	63681	0.0927611
GO:0051554	flavonol metabolic process	Biological process	6	0.022409	2.73891	6	73	1911	63681	0.0927611
GO:0034285	response to disaccharide	Biological process	6	0.022586	1.36945	45	1095	1911	63681	0.0931984
GO:0009744	response to sucrose	Biological process	7	0.022586	1.36945	45	1095	1911	63681	0.0931984
GO:0045934	negative regulation of nucleobase-containing compound metabolic process	Biological process	7	0.0231697	1.27095	73	1914	1911	63681	0.0953059
GO:0006081	cellular aldehyde metabolic process	Biological process	4	0.023324	1.27283	72	1885	1911	63681	0.0957896
GO:0048646	anatomical structure formation involved in morphogenesis	Biological process	3	0.0246233	1.29533	62	1595	1911	63681	0.100494
GO:0051188	cofactor biosynthetic process	Biological process	5	0.024894	1.29452	62	1596	1911	63681	0.10144
GO:0006099	tricarboxylic acid cycle	Biological process	10	0.024906	2.057	10	162	1911	63681	0.101331
GO:0006333	chromatin assembly or disassembly	Biological process	5	0.0255566	1.57659	22	465	1911	63681	0.103816
GO:0045165	cell fate commitment	Biological process	5	0.0256879	1.76004	15	284	1911	63681	0.104187
GO:0048598	embryonic morphogenesis	Biological process	4	0.0257762	2.14222	9	140	1911	63681	0.104384
GO:0030243	cellulose metabolic process	Biological process	9	0.0260648	1.42695	34	794	1911	63681	0.105389
GO:0042398	cellular modified amino acid biosynthetic process	Biological process	6	0.0265258	1.686	17	336	1911	63681	0.107087
GO:0045037	protein import into chloroplast stroma	Biological process	12	0.0267119	2.63079	6	76	1911	63681	0.107341
GO:0048366	leaf development	Biological process	6	0.0268673	1.24502	81	2168	1911	63681	0.1078
GO:0046132	pyrimidine ribonucleoside biosynthetic process	Biological process	10	0.0269709	2.40478	7	97	1911	63681	0.108049
GO:0046134	pyrimidine nucleoside biosynthetic process	Biological process	9	0.0269709	2.40478	7	97	1911	63681	0.108049
GO:0043473	pigmentation	Biological process	3	0.0276842	1.48962	27	604	1911	63681	0.11023
GO:0043476	pigment accumulation	Biological process	4	0.0276842	1.48962	27	604	1911	63681	0.11023
GO:0043478	pigment accumulation in response to UV light	Biological process	7	0.0276842	1.48962	27	604	1911	63681	0.11023
GO:0043479	pigment accumulation in tissues in response to UV light	Biological process	8	0.0276842	1.48962	27	604	1911	63681	0.11023
GO:0043480	pigment accumulation in tissues	Biological process	5	0.0276842	1.48962	27	604	1911	63681	0.11023
GO:0043481	anthocyanin accumulation in tissues in response to UV light	Biological process	9	0.0276842	1.48962	27	604	1911	63681	0.11023
GO:0048826	cotyledon morphogenesis	Biological process	6	0.0282595	2.59663	6	77	1911	63681	0.111333
GO:0031163	metallo-sulfur cluster assembly	Biological process	5	0.0296142	1.59062	20	419	1911	63681	0.116319
GO:0016226	iron-sulfur cluster assembly	Biological process	6	0.0296142	1.59062	20	419	1911	63681	0.116319
GO:0000059	obsolete protein import into nucleus, docking	Biological process	0	0.0299015	2.87271	5	58	1911	63681	0.117095
GO:0034644	cellular response to UV	Biological process	7	0.0299015	2.87271	5	58	1911	63681	0.117095
GO:0090697	post-embryonic plant organ morphogenesis	Biological process	5	0.0301728	1.33759	46	1146	1911	63681	0.117805
GO:0010817	regulation of hormone levels	Biological process	4	0.0305538	1.22689	87	2363	1911	63681	0.118937
GO:0009913	epidermal cell differentiation	Biological process	7	0.0310589	2.18514	8	122	1911	63681	0.120723
GO:0030855	epithelial cell differentiation	Biological process	6	0.0310589	2.18514	8	122	1911	63681	0.120723
GO:0090700	maintenance of plant organ identity	Biological process	7	0.0315292	2.53089	6	79	1911	63681	0.121826
GO:0048497	maintenance of floral organ identity	Biological process	8	0.0315292	2.53089	6	79	1911	63681	0.121826
GO:0071941	nitrogen cycle metabolic process	Biological process	4	0.0318907	2.82402	5	59	1911	63681	0.122859
GO:0044272	sulfur compound biosynthetic process	Biological process	5	0.0328449	1.21948	89	2432	1911	63681	0.126349
GO:0002181	cytoplasmic translation	Biological process	9	0.0341755	2.2869	7	102	1911	63681	0.130507
GO:0008361	regulation of cell size	Biological process	6	0.034451	1.66098	16	321	1911	63681	0.131366
GO:0000272	polysaccharide catabolic process	Biological process	6	0.0351547	1.54139	21	454	1911	63681	0.133465
GO:0010315	auxin efflux	Biological process	8	0.0357556	2.2647	7	103	1911	63681	0.135549
GO:0010449	root meristem growth	Biological process	6	0.0373831	2.24292	7	104	1911	63681	0.141514
GO:0006400	tRNA modification	Biological process	11	0.0380468	2.09911	8	127	1911	63681	0.14299
GO:0010030	positive regulation of seed germination	Biological process	9	0.0387837	2.40892	6	83	1911	63681	0.14555
GO:0015766	disaccharide transport	Biological process	8	0.0387837	2.40892	6	83	1911	63681	0.14555
GO:0015772	oligosaccharide transport	Biological process	7	0.0387837	2.40892	6	83	1911	63681	0.14555
GO:1901607	alpha-amino acid biosynthetic process	Biological process	10	0.039596	1.23872	71	1910	1911	63681	0.14775
GO:0006730	one-carbon metabolic process	Biological process	5	0.0404508	1.9731	9	152	1911	63681	0.150724
GO:0098727	maintenance of cell number	Biological process	3	0.0405949	1.62553	16	328	1911	63681	0.151045
GO:0019827	stem cell population maintenance	Biological process	4	0.0405949	1.62553	16	328	1911	63681	0.151045
GO:0051273	beta-glucan metabolic process	Biological process	8	0.0420246	1.36412	35	855	1911	63681	0.153737
GO:0006949	syncytium formation	Biological process	4	0.0425548	2.18003	7	107	1911	63681	0.155459
GO:0051259	protein oligomerization	Biological process	7	0.0443764	2.15985	7	108	1911	63681	0.161887
GO:0009057	macromolecule catabolic process	Biological process	5	0.046513	1.16502	121	3461	1911	63681	0.168739
GO:0051783	regulation of nuclear division	Biological process	7	0.0470195	2.29816	6	87	1911	63681	0.17034
GO:0009658	chloroplast organization	Biological process	6	0.0470789	1.33294	38	950	1911	63681	0.170319
GO:0045892	negative regulation of transcription, DNA-templated	Biological process	11	0.0484655	1.23018	68	1842	1911	63681	0.175092
GO:1902679	negative regulation of RNA biosynthetic process	Biological process	9	0.0484655	1.23018	68	1842	1911	63681	0.175092
GO:1903507	negative regulation of nucleic acid-templated transcription	Biological process	10	0.0484655	1.23018	68	1842	1911	63681	0.175092
GO:0051253	negative regulation of RNA metabolic process	Biological process	8	0.0493392	1.22885	68	1844	1911	63681	0.17654
GO:1901657	glycosyl compound metabolic process	Biological process	5	0.0495336	1.26605	53	1395	1911	63681	0.176993
