# Supplementary material for: Overdominance at the Gene Expression Level Plays a Critical Role in the Hybrid Root Growth of Brassica napus
Source: Int J Mol Sci. 2021 Aug 26;22(17):9246. doi: 10.3390/ijms22179246 (PMC8431428; doi:10.3390/ijms22179246)
Supplement: Supplementary file 1 [file ijms-22-09246-s001.zip › ijms-1346590-supplementary/Supplementary Materials/Supplementary file 11.xlsx]

## Sheet: GO terms for up-regulated
GO_ID	GO_Name	Class	GO_Level	P_value	EnrichmentScore	HitsGenesCountsInSelectedSet	HitsGenesCountsInBackground	AllGenesCountsInSelectedSet	AllGenesCountsInBackground	corrected p-value(BH method)
GO:0044464	cell part	Cellular component	2	0.0148769	1.01559	1288	67564	1359	72400	0.19402
GO:0005623	cell	Cellular component	2	0.0148769	1.01559	1288	67564	1359	72400	0.19402
GO:0044424	intracellular part	Cellular component	3	0.00719143	1.0279	1183	61313	1359	72400	0.125051
GO:0005622	intracellular	Cellular component	3	0.0121327	1.02558	1183	61452	1359	72400	0.165111
GO:0043227	membrane-bounded organelle	Cellular component	3	0.0394933	1.02793	1041	53952	1359	72400	0.353182
GO:0043231	intracellular membrane-bounded organelle	Cellular component	5	0.0269128	1.0308	1040	53750	1359	72400	0.28079
GO:0008152	metabolic process	Biological process	2	0.00882465	1.03674	958	49366	1192	63681	0.0756848
GO:0044699	single-organism process	Biological process	2	0.0046135	1.05114	855	43455	1192	63681	0.0510025
GO:0005737	cytoplasm	Cellular component	4	0.000992309	1.07206	835	41494	1359	72400	0.0443704
GO:0071704	organic substance metabolic process	Biological process	3	0.0343205	1.03693	831	42814	1192	63681	0.18099
GO:0044237	cellular metabolic process	Biological process	3	4.60528e-05	1.08566	816	40154	1192	63681	0.00123319
GO:0044444	cytoplasmic part	Cellular component	4	0.0220925	1.05669	694	34989	1359	72400	0.256109
GO:0050896	response to stimulus	Biological process	2	3.30601e-08	1.16419	658	30195	1192	63681	2.84553e-06
GO:0044763	single-organism cellular process	Biological process	3	1.24075e-05	1.1315	624	29462	1192	63681	0.000398693
GO:0003824	catalytic activity	Molecular function	2	0.00831857	1.06708	620	32336	1065	59271	0.0668305
GO:0044710	single-organism metabolic process	Biological process	3	7.74884e-10	1.22239	561	24518	1192	63681	1.03748e-07
GO:0042221	response to chemical	Biological process	3	1.26699e-12	1.32183	461	18632	1192	63681	2.54453e-10
GO:0006950	response to stress	Biological process	3	3.80315e-06	1.19966	432	19238	1192	63681	0.000141009
GO:0009536	plastid	Cellular component	6	4.81584e-09	1.30712	379	15447	1359	72400	1.50736e-06
GO:0010033	response to organic substance	Biological process	4	4.9627e-14	1.42427	369	13841	1192	63681	1.49501e-11
GO:0009507	chloroplast	Cellular component	7	1.95584e-08	1.29834	368	15100	1359	72400	3.06089e-06
GO:0044281	small molecule metabolic process	Biological process	4	2.85549e-13	1.42174	354	13302	1192	63681	7.64638e-11
GO:1901700	response to oxygen-containing compound	Biological process	4	1.88738e-15	1.48786	342	12280	1192	63681	6.49798e-13
GO:0051179	localization	Biological process	2	0.0472977	1.08362	332	16368	1192	63681	0.224828
GO:0009628	response to abiotic stimulus	Biological process	3	4.42121e-05	1.22125	314	13736	1192	63681	0.0011972
GO:0051716	cellular response to stimulus	Biological process	3	0.00885762	1.12991	302	14279	1192	63681	0.0756981
GO:0044711	single-organism biosynthetic process	Biological process	4	0.00802718	1.13462	294	13843	1192	63681	0.0713856
GO:0006793	phosphorus metabolic process	Biological process	4	0.0022837	1.16644	281	12870	1192	63681	0.0300749
GO:0006796	phosphate-containing compound metabolic process	Biological process	5	0.00105283	1.18452	276	12448	1192	63681	0.0169155
GO:0043436	oxoacid metabolic process	Biological process	6	1.13254e-12	1.50676	272	9644	1192	63681	2.72942e-10
GO:0006082	organic acid metabolic process	Biological process	5	1.15963e-12	1.50645	272	9646	1192	63681	2.54064e-10
GO:0009605	response to external stimulus	Biological process	3	9.64197e-08	1.34782	270	10702	1192	63681	5.95824e-06
GO:0007154	cell communication	Biological process	3	3.24043e-05	1.25725	264	11218	1192	63681	0.000908074
GO:0019752	carboxylic acid metabolic process	Biological process	7	1.96787e-12	1.51788	260	9151	1192	63681	3.64813e-10
GO:0051704	multi-organism process	Biological process	2	0.00237318	1.18832	234	10520	1192	63681	0.0307493
GO:0009719	response to endogenous stimulus	Biological process	3	5.4811e-09	1.43919	232	8612	1192	63681	5.74323e-07
GO:0009725	response to hormone	Biological process	5	4.99824e-09	1.4422	231	8557	1192	63681	6.02288e-07
GO:0009056	catabolic process	Biological process	3	2.56129e-08	1.41577	230	8679	1192	63681	2.37411e-06
GO:0001101	response to acid chemical	Biological process	4	8.42042e-08	1.40162	225	8576	1192	63681	5.637e-06
GO:0009607	response to biotic stimulus	Biological process	3	9.18099e-08	1.43043	204	7619	1192	63681	5.82268e-06
GO:0044700	single organism signaling	Biological process	3	0.0203267	1.14532	203	9469	1192	63681	0.125932
GO:0023052	signaling	Biological process	2	0.0207932	1.14459	203	9475	1192	63681	0.125909
GO:0043207	response to external biotic stimulus	Biological process	4	8.20047e-08	1.43581	202	7516	1192	63681	5.81269e-06
GO:0051707	response to other organism	Biological process	5	8.20047e-08	1.43581	202	7516	1192	63681	5.81269e-06
GO:0007165	signal transduction	Biological process	5	0.00793203	1.17453	202	9188	1192	63681	0.0708007
GO:1901575	organic substance catabolic process	Biological process	4	6.43512e-06	1.36248	190	7450	1192	63681	0.000231472
GO:0044248	cellular catabolic process	Biological process	4	3.75939e-08	1.47784	187	6760	1192	63681	3.12419e-06
GO:0006952	defense response	Biological process	4	0.00184224	1.2289	184	7999	1192	63681	0.0259637
GO:0032787	monocarboxylic acid metabolic process	Biological process	8	1.60787e-07	1.46011	180	6586	1192	63681	8.80675e-06
GO:0070887	cellular response to chemical stimulus	Biological process	4	0.000161079	1.2993	179	7360	1192	63681	0.00373269
GO:0016310	phosphorylation	Biological process	6	0.0181914	1.16519	173	7932	1192	63681	0.121782
GO:0055114	oxidation-reduction process	Biological process	4	1.0958e-05	1.3825	168	6492	1192	63681	0.000371956
GO:0006629	lipid metabolic process	Biological process	4	0.00014336	1.31582	168	6821	1192	63681	0.00342076
GO:0044712	single-organism catabolic process	Biological process	4	1.34505e-09	1.61523	160	5292	1192	63681	1.70608e-07
GO:0033554	cellular response to stress	Biological process	4	0.00847176	1.20198	159	7067	1192	63681	0.0734423
GO:0071310	cellular response to organic substance	Biological process	5	0.00403338	1.23096	155	6727	1192	63681	0.0465093
GO:0044283	small molecule biosynthetic process	Biological process	5	0.0014101	1.26631	154	6497	1192	63681	0.0213732
GO:0044255	cellular lipid metabolic process	Biological process	5	9.69873e-07	1.47961	150	5416	1192	63681	3.83179e-05
GO:0044765	single-organism transport	Biological process	5	0.0372489	1.15264	149	6906	1192	63681	0.188989
GO:1902578	single-organism localization	Biological process	3	0.0483012	1.1414	149	6974	1192	63681	0.227355
GO:1901135	carbohydrate derivative metabolic process	Biological process	4	0.00785224	1.21626	146	6413	1192	63681	0.0703491
GO:0001071	nucleic acid binding transcription factor activity	Molecular function	2	0.000396981	1.31872	143	6035	1065	59271	0.00800719
GO:0003700	transcription factor activity, sequence-specific DNA binding	Molecular function	3	0.000509406	1.31232	142	6022	1065	59271	0.0100608
GO:0006811	ion transport	Biological process	5	0.0184483	1.18775	141	6342	1192	63681	0.122481
GO:0016491	oxidoreductase activity	Molecular function	3	0.00296336	1.26106	136	6002	1065	59271	0.0319235
GO:0019637	organophosphate metabolic process	Biological process	5	0.00165758	1.28639	134	5565	1192	63681	0.0242107
GO:0002376	immune system process	Biological process	2	0.000148922	1.37144	132	5142	1192	63681	0.00351864
GO:0044435	plastid part	Cellular component	5	0.00115181	1.30747	130	5297	1359	72400	0.0400573
GO:0098542	defense response to other organism	Biological process	6	0.0038931	1.26045	130	5510	1192	63681	0.0451075
GO:0044434	chloroplast part	Cellular component	6	0.00108212	1.31289	128	5194	1359	72400	0.042338
GO:1901701	cellular response to oxygen-containing compound	Biological process	5	0.000227305	1.36708	127	4963	1192	63681	0.00498005
GO:0016301	kinase activity	Molecular function	5	0.00834306	1.2363	124	5582	1065	59271	0.066464
GO:0032870	cellular response to hormone stimulus	Biological process	6	0.000135662	1.39307	123	4717	1192	63681	0.00326945
GO:0071495	cellular response to endogenous stimulus	Biological process	4	0.000149041	1.38983	123	4728	1192	63681	0.00348728
GO:0046394	carboxylic acid biosynthetic process	Biological process	8	0.00817153	1.24241	121	5203	1192	63681	0.0724021
GO:0016053	organic acid biosynthetic process	Biological process	6	0.00817153	1.24241	121	5203	1192	63681	0.0724021
GO:0045087	innate immune response	Biological process	5	0.000350535	1.36807	119	4647	1192	63681	0.00692451
GO:0006955	immune response	Biological process	3	0.000438636	1.35987	119	4675	1192	63681	0.00838978
GO:0006970	response to osmotic stress	Biological process	4	0.000647438	1.34548	119	4725	1192	63681	0.0117318
GO:0071229	cellular response to acid chemical	Biological process	5	2.07213e-06	1.54986	117	4033	1192	63681	8.05458e-05
GO:0033993	response to lipid	Biological process	5	0.000466728	1.36381	116	4544	1192	63681	0.00878761
GO:0009651	response to salt stress	Biological process	5	0.000424314	1.36953	115	4486	1192	63681	0.00824675
GO:0009266	response to temperature stimulus	Biological process	4	0.00840327	1.24923	115	4918	1192	63681	0.0736432
GO:0051186	cofactor metabolic process	Biological process	4	8.65218e-06	1.51162	114	4029	1192	63681	0.000302199
GO:0009755	hormone-mediated signaling pathway	Biological process	6	0.000431645	1.37107	114	4442	1192	63681	0.00832211
GO:0016773	phosphotransferase activity, alcohol group as acceptor	Molecular function	5	0.00857583	1.24977	113	5032	1065	59271	0.0640149
GO:0006520	cellular amino acid metabolic process	Biological process	8	4.49607e-08	1.69647	112	3527	1192	63681	3.3861e-06
GO:1901565	organonitrogen compound catabolic process	Biological process	5	2.15379e-05	1.49864	108	3850	1192	63681	0.00064082
GO:0048583	regulation of response to stimulus	Biological process	4	0.000868956	1.35909	107	4206	1192	63681	0.0147478
GO:0006812	cation transport	Biological process	6	0.0257397	1.21583	100	4394	1192	63681	0.14805
GO:0009743	response to carbohydrate	Biological process	5	0	2.47002	97	2098	1192	63681	0
GO:0044282	small molecule catabolic process	Biological process	5	4.72394e-08	1.77591	97	2918	1192	63681	3.44991e-06
GO:1901615	organic hydroxy compound metabolic process	Biological process	4	0.00115177	1.37886	94	3642	1192	63681	0.0182616
GO:0080134	regulation of response to stress	Biological process	5	5.56865e-05	1.51476	93	3280	1192	63681	0.00144306
GO:0009737	response to abscisic acid	Biological process	6	0.000709031	1.40669	92	3494	1192	63681	0.0124727
GO:0097305	response to alcohol	Biological process	5	0.00075405	1.40388	92	3501	1192	63681	0.0131685
GO:0031347	regulation of defense response	Biological process	6	2.60834e-05	1.5552	91	3126	1192	63681	0.000757361
GO:0009620	response to fungus	Biological process	6	1.13884e-05	1.59983	89	2972	1192	63681	0.000381195
GO:0009409	response to cold	Biological process	5	0.00243341	1.37067	84	3274	1192	63681	0.0311942
GO:0009617	response to bacterium	Biological process	6	0.00379227	1.34762	84	3330	1192	63681	0.0445823
GO:1901605	alpha-amino acid metabolic process	Biological process	9	2.61375e-05	1.59823	82	2741	1192	63681	0.000749897
GO:0009753	response to jasmonic acid	Biological process	6	4.99522e-05	1.56791	82	2794	1192	63681	0.00132291
GO:0044262	cellular carbohydrate metabolic process	Biological process	5	0.0200143	1.25956	82	3478	1192	63681	0.124637
GO:0072330	monocarboxylic acid biosynthetic process	Biological process	9	0.00330823	1.36336	81	3174	1192	63681	0.0400644
GO:0009814	defense response, incompatible interaction	Biological process	7	0.00126079	1.42103	79	2970	1192	63681	0.0194775
GO:0090407	organophosphate biosynthetic process	Biological process	6	0.0322907	1.23761	78	3367	1192	63681	0.172551
GO:0006732	coenzyme metabolic process	Biological process	5	0.00636523	1.33863	77	3073	1192	63681	0.0603945
GO:0009414	response to water deprivation	Biological process	6	2.90774e-06	1.74033	76	2333	1192	63681	0.000109495
GO:0009415	response to water	Biological process	5	4.17702e-06	1.72261	76	2357	1192	63681	0.000152525
GO:0034285	response to disaccharide	Biological process	6	0	3.65915	75	1095	1192	63681	0
GO:0009744	response to sucrose	Biological process	7	0	3.65915	75	1095	1192	63681	0
GO:0006091	generation of precursor metabolites and energy	Biological process	4	0.00657364	1.34559	74	2938	1192	63681	0.0614049
GO:0046395	carboxylic acid catabolic process	Biological process	8	5.26485e-09	2.08218	73	1873	1192	63681	6.04205e-07
GO:0016054	organic acid catabolic process	Biological process	6	5.26485e-09	2.08218	73	1873	1192	63681	6.04205e-07
GO:0009991	response to extracellular stimulus	Biological process	4	1.40152e-07	1.91643	73	2035	1192	63681	8.04203e-06
GO:0009532	plastid stroma	Cellular component	6	0.0282942	1.25969	72	3045	1359	72400	0.28568
GO:0009570	chloroplast stroma	Cellular component	7	0.0260536	1.26759	71	2984	1359	72400	0.281199
GO:0031668	cellular response to extracellular stimulus	Biological process	5	1.36797e-07	1.93821	71	1957	1192	63681	8.04098e-06
GO:0071496	cellular response to external stimulus	Biological process	4	1.56298e-07	1.9313	71	1964	1192	63681	8.75997e-06
GO:0009893	positive regulation of metabolic process	Biological process	5	0.0295472	1.25807	71	3015	1192	63681	0.162206
GO:0034284	response to monosaccharide	Biological process	6	1.11022e-16	3.83983	69	960	1192	63681	4.4594e-14
GO:0009526	plastid envelope	Cellular component	6	0.018138	1.3027	67	2740	1359	72400	0.218354
GO:0009746	response to hexose	Biological process	7	0	3.84054	67	932	1192	63681	0
GO:0009891	positive regulation of biosynthetic process	Biological process	6	0.0169395	1.30634	67	2740	1192	63681	0.115649
GO:0008219	cell death	Biological process	4	0.0373789	1.25066	67	2862	1192	63681	0.188458
GO:0006081	cellular aldehyde metabolic process	Biological process	4	2.52556e-06	1.8422	65	1885	1192	63681	9.66129e-05
GO:0009627	systemic acquired resistance	Biological process	8	0.00386941	1.41045	65	2462	1192	63681	0.0452683
GO:0009611	response to wounding	Biological process	4	9.46911e-06	1.77616	64	1925	1192	63681	0.000326008
GO:0010243	response to organonitrogen compound	Biological process	5	0.00914948	1.35787	64	2518	1192	63681	0.0760354
GO:0009941	chloroplast envelope	Cellular component	7	0.0250188	1.29138	63	2599	1359	72400	0.279674
GO:0009750	response to fructose	Biological process	8	0	4.10951	62	806	1192	63681	0
GO:0010200	response to chitin	Biological process	6	0.00527398	1.40291	62	2361	1192	63681	0.0529595
GO:0045088	regulation of innate immune response	Biological process	7	0.0105868	1.35898	61	2398	1192	63681	0.0825705
GO:0050776	regulation of immune response	Biological process	5	0.0119268	1.35054	61	2413	1192	63681	0.0903886
GO:0002682	regulation of immune system process	Biological process	4	0.0133019	1.34275	61	2427	1192	63681	0.0971445
GO:0048037	cofactor binding	Molecular function	3	8.00393e-06	1.82371	60	1831	1065	59271	0.000948465
GO:0031667	response to nutrient levels	Biological process	5	1.15985e-05	1.80282	60	1778	1192	63681	0.00038291
GO:0006733	oxidoreduction coenzyme metabolic process	Biological process	6	0.00778793	1.38463	60	2315	1192	63681	0.0700333
GO:0010941	regulation of cell death	Biological process	5	0.00944363	1.37101	60	2338	1192	63681	0.0771496
GO:0031669	cellular response to nutrient levels	Biological process	6	1.28632e-05	1.81734	58	1705	1192	63681	0.000402602
GO:0050832	defense response to fungus	Biological process	7	0.00292951	1.46228	58	2119	1192	63681	0.036964
GO:0010016	shoot system morphogenesis	Biological process	4	0.00424074	1.43652	58	2157	1192	63681	0.0484369
GO:0043067	regulation of programmed cell death	Biological process	6	0.0130635	1.35546	58	2286	1192	63681	0.0965737
GO:0042592	homeostatic process	Biological process	4	0.0470545	1.2555	58	2468	1192	63681	0.224113
GO:0006631	fatty acid metabolic process	Biological process	9	0.00213583	1.4898	57	2044	1192	63681	0.0287561
GO:0006612	protein targeting to membrane	Biological process	11	0.00678896	1.40784	57	2163	1192	63681	0.0629285
GO:0090150	establishment of protein localization to membrane	Biological process	7	0.00962422	1.38227	57	2203	1192	63681	0.0783593
GO:0072657	protein localization to membrane	Biological process	6	0.00962422	1.38227	57	2203	1192	63681	0.0783593
GO:0010604	positive regulation of macromolecule metabolic process	Biological process	6	0.0237177	1.3137	57	2318	1192	63681	0.137734
GO:0031325	positive regulation of cellular metabolic process	Biological process	6	0.0396244	1.27252	57	2393	1192	63681	0.19449
GO:0009579	thylakoid	Cellular component	4	0.00299022	1.47327	56	2025	1359	72400	0.0623959
GO:0006720	isoprenoid metabolic process	Biological process	6	0.0110805	1.37614	56	2174	1192	63681	0.0858648
GO:0009626	plant-type hypersensitive response	Biological process	7	0.028535	1.30245	56	2297	1192	63681	0.159188
GO:0034050	host programmed cell death induced by symbiont	Biological process	6	0.0297583	1.29906	56	2303	1192	63681	0.16189
GO:0022804	active transmembrane transporter activity	Molecular function	4	0.012459	1.37078	55	2233	1065	59271	0.0843654
GO:0006644	phospholipid metabolic process	Biological process	6	0.00120628	1.54242	55	1905	1192	63681	0.0187558
GO:0010363	regulation of plant-type hypersensitive response	Biological process	8	0.0073878	1.41129	55	2082	1192	63681	0.0682169
GO:0006090	pyruvate metabolic process	Biological process	9	0.0132818	1.36665	55	2150	1192	63681	0.0978876
GO:0080135	regulation of cellular response to stress	Biological process	6	0.0147645	1.35844	55	2163	1192	63681	0.104963
GO:0051173	positive regulation of nitrogen compound metabolic process	Biological process	6	0.0423381	1.27309	55	2308	1192	63681	0.206548
GO:0046983	protein dimerization activity	Molecular function	4	0.0136879	1.36791	54	2197	1065	59271	0.0901121
GO:0015979	photosynthesis	Biological process	4	2.31431e-05	1.82356	54	1582	1192	63681	0.000680182
GO:0072524	pyridine-containing compound metabolic process	Biological process	5	0.0104638	1.38963	54	2076	1192	63681	0.0821428
GO:0048366	leaf development	Biological process	6	0.0220437	1.33066	54	2168	1192	63681	0.129891
GO:0010557	positive regulation of macromolecule biosynthetic process	Biological process	7	0.0219603	1.33496	53	2121	1192	63681	0.129716
GO:0031328	positive regulation of cellular biosynthetic process	Biological process	7	0.0295561	1.31025	53	2161	1192	63681	0.161887
GO:0071396	cellular response to lipid	Biological process	6	0.0380352	1.28878	53	2197	1192	63681	0.190968
GO:0019682	glyceraldehyde-3-phosphate metabolic process	Biological process	6	1.25455e-05	1.8911	52	1469	1192	63681	0.000397825
GO:0009267	cellular response to starvation	Biological process	7	0.000169289	1.70641	52	1628	1192	63681	0.00388559
GO:0042594	response to starvation	Biological process	6	0.000239271	1.68162	52	1652	1192	63681	0.0051486
GO:0046496	nicotinamide nucleotide metabolic process	Biological process	10	0.0182366	1.35448	52	2051	1192	63681	0.121746
GO:0019362	pyridine nucleotide metabolic process	Biological process	9	0.0186799	1.3525	52	2054	1192	63681	0.123339
GO:0072593	reactive oxygen species metabolic process	Biological process	4	0.0185462	1.35755	51	2007	1192	63681	0.122792
GO:0008299	isoprenoid biosynthetic process	Biological process	7	0.0220936	1.34283	51	2029	1192	63681	0.129867
GO:0009723	response to ethylene	Biological process	6	0.0224414	1.34151	51	2031	1192	63681	0.13159
GO:0048585	negative regulation of response to stimulus	Biological process	5	0.0277858	1.32327	51	2059	1192	63681	0.156093
GO:0042440	pigment metabolic process	Biological process	4	0.000257328	1.70649	49	1534	1192	63681	0.00548814
GO:0009863	salicylic acid mediated signaling pathway	Biological process	6	0.0271925	1.33355	49	1963	1192	63681	0.154198
GO:0071446	cellular response to salicylic acid stimulus	Biological process	7	0.0306979	1.32277	49	1979	1192	63681	0.166251
GO:0006972	hyperosmotic response	Biological process	5	0.000214146	1.73149	48	1481	1192	63681	0.00477864
GO:0051188	cofactor biosynthetic process	Biological process	5	0.00106415	1.60673	48	1596	1192	63681	0.0169841
GO:0048878	chemical homeostasis	Biological process	5	0.00149257	1.58	48	1623	1192	63681	0.0223422
GO:0045893	positive regulation of transcription, DNA-templated	Biological process	11	0.0498249	1.28217	48	2000	1192	63681	0.230919
GO:0051254	positive regulation of RNA metabolic process	Biological process	8	0.0498249	1.28217	48	2000	1192	63681	0.230919
GO:1902680	positive regulation of RNA biosynthetic process	Biological process	9	0.0498249	1.28217	48	2000	1192	63681	0.230919
GO:1903508	positive regulation of nucleic acid-templated transcription	Biological process	10	0.0498249	1.28217	48	2000	1192	63681	0.230919
GO:0043565	sequence-specific DNA binding	Molecular function	6	0.0016507	1.57954	47	1656	1065	59271	0.0223551
GO:0042743	hydrogen peroxide metabolic process	Biological process	5	0.0146121	1.39806	47	1796	1192	63681	0.104187
GO:0015711	organic anion transport	Biological process	7	0.0159587	1.39032	47	1806	1192	63681	0.111803
GO:0046942	carboxylic acid transport	Biological process	8	0.00321652	1.53401	46	1602	1192	63681	0.0395501
GO:0015849	organic acid transport	Biological process	6	0.00321652	1.53401	46	1602	1192	63681	0.0395501
GO:0008654	phospholipid biosynthetic process	Biological process	7	0.00340498	1.52924	46	1607	1192	63681	0.0406238
GO:0031976	plastid thylakoid	Cellular component	6	0.0101446	1.44332	45	1661	1359	72400	0.167119
GO:0009534	chloroplast thylakoid	Cellular component	7	0.0101446	1.44332	45	1661	1359	72400	0.167119
GO:0016042	lipid catabolic process	Biological process	5	4.12748e-05	1.90195	45	1264	1192	63681	0.00113037
GO:0044242	cellular lipid catabolic process	Biological process	6	2.67994e-05	1.95398	44	1203	1192	63681	0.000759841
GO:0009657	plastid organization	Biological process	5	0.00770841	1.47376	44	1595	1192	63681	0.070636
GO:0019725	cellular homeostasis	Biological process	5	0.0115697	1.44388	43	1591	1192	63681	0.087959
GO:0071215	cellular response to abscisic acid stimulus	Biological process	7	0.0127491	1.43486	43	1601	1192	63681	0.095125
GO:0097306	cellular response to alcohol	Biological process	6	0.0127491	1.43486	43	1601	1192	63681	0.095125
GO:0009867	jasmonic acid mediated signaling pathway	Biological process	7	0.0128723	1.43397	43	1602	1192	63681	0.0954531
GO:0071395	cellular response to jasmonic acid stimulus	Biological process	7	0.0140255	1.42596	43	1611	1192	63681	0.101506
GO:1901361	organic cyclic compound catabolic process	Biological process	5	0.00648764	1.50489	42	1491	1192	63681	0.0613146
GO:0031348	negative regulation of defense response	Biological process	7	0.0187086	1.40501	42	1597	1192	63681	0.123191
GO:0015291	secondary active transmembrane transporter activity	Molecular function	5	0.000131766	1.86574	41	1223	1065	59271	0.00480438
GO:0006778	porphyrin-containing compound metabolic process	Biological process	6	5.09443e-07	2.37053	41	924	1192	63681	2.19242e-05
GO:0033013	tetrapyrrole metabolic process	Biological process	5	6.00509e-07	2.35524	41	930	1192	63681	2.53899e-05
GO:0030258	lipid modification	Biological process	6	2.08402e-05	2.03188	41	1078	1192	63681	0.000627811
GO:0050801	ion homeostasis	Biological process	6	0.00236131	1.60702	41	1363	1192	63681	0.0307608
GO:0046700	heterocycle catabolic process	Biological process	5	0.00327538	1.57694	41	1389	1192	63681	0.039867
GO:0004553	hydrolase activity, hydrolyzing O-glycosyl compounds	Molecular function	5	0.00318225	1.58897	40	1401	1065	59271	0.0320933
GO:0016798	hydrolase activity, acting on glycosyl bonds	Molecular function	4	0.00888415	1.49105	40	1493	1065	59271	0.0652882
GO:0042579	microbody	Cellular component	6	4.62504e-06	2.19462	40	971	1359	72400	0.000482546
GO:0005777	peroxisome	Cellular component	7	4.62504e-06	2.19462	40	971	1359	72400	0.000482546
GO:0015994	chlorophyll metabolic process	Biological process	7	3.78169e-08	2.65459	40	805	1192	63681	3.03796e-06
GO:0009063	cellular amino acid catabolic process	Biological process	9	1.23389e-07	2.53794	40	842	1192	63681	7.4342e-06
GO:0015672	monovalent inorganic cation transport	Biological process	7	0.00160142	1.65398	40	1292	1192	63681	0.0238236
GO:0019439	aromatic compound catabolic process	Biological process	5	0.0110213	1.47071	40	1453	1192	63681	0.0856816
GO:0009738	abscisic acid-activated signaling pathway	Biological process	7	0.0154965	1.43709	40	1487	1192	63681	0.108882
GO:1901606	alpha-amino acid catabolic process	Biological process	10	2.40174e-07	2.50725	39	831	1192	63681	1.2583e-05
GO:0072329	monocarboxylic acid catabolic process	Biological process	9	5.65848e-05	1.98053	39	1052	1192	63681	0.00145074
GO:0044270	cellular nitrogen compound catabolic process	Biological process	5	0.00862082	1.50326	39	1386	1192	63681	0.0744666
GO:0044436	thylakoid part	Cellular component	4	0.0326111	1.37436	38	1473	1359	72400	0.300214
GO:0050662	coenzyme binding	Molecular function	4	0.000650223	1.79688	36	1115	1065	59271	0.0118541
GO:0006066	alcohol metabolic process	Biological process	5	1.71492e-05	2.16827	36	887	1192	63681	0.00052316
GO:0042538	hyperosmotic salinity response	Biological process	6	3.99035e-05	2.08144	36	924	1192	63681	0.00110537
GO:0019684	photosynthesis, light reaction	Biological process	5	0.00542368	1.58032	36	1217	1192	63681	0.0537904
GO:0071214	cellular response to abiotic stimulus	Biological process	4	0.000286748	1.90023	35	984	1192	63681	0.00606195
GO:0055080	cation homeostasis	Biological process	7	0.0102006	1.5239	35	1227	1192	63681	0.0814018
GO:0034440	lipid oxidation	Biological process	7	5.81986e-05	2.09263	34	868	1192	63681	0.00147641
GO:0009062	fatty acid catabolic process	Biological process	10	0.000697874	1.82553	34	995	1192	63681	0.0123667
GO:0055082	cellular chemical homeostasis	Biological process	6	0.00186348	1.72008	34	1056	1192	63681	0.0261104
GO:0009072	aromatic amino acid family metabolic process	Biological process	9	0.00654239	1.58361	34	1147	1192	63681	0.0613508
GO:0006635	fatty acid beta-oxidation	Biological process	11	5.35047e-05	2.15853	32	792	1192	63681	0.00140159
GO:0019395	fatty acid oxidation	Biological process	10	9.07092e-05	2.09762	32	815	1192	63681	0.00223071
GO:0006739	NADP metabolic process	Biological process	11	0.000312735	1.95601	32	874	1192	63681	0.00633354
GO:0019288	isopentenyl diphosphate biosynthetic process, methylerythritol 4-phosphate pathway	Biological process	10	0.00136862	1.78824	32	956	1192	63681	0.0208758
GO:0009240	isopentenyl diphosphate biosynthetic process	Biological process	8	0.0018887	1.7516	32	976	1192	63681	0.0263107
GO:0046490	isopentenyl diphosphate metabolic process	Biological process	7	0.0018887	1.7516	32	976	1192	63681	0.0263107
GO:0009308	amine metabolic process	Biological process	5	0.025667	1.44755	32	1181	1192	63681	0.147984
GO:0070838	divalent metal ion transport	Biological process	8	0.0456234	1.37645	32	1242	1192	63681	0.219029
GO:0080167	response to karrikin	Biological process	4	0.000239189	2.03907	30	786	1192	63681	0.00519319
GO:0009694	jasmonic acid metabolic process	Biological process	9	0.000665676	1.91483	30	837	1192	63681	0.0119722
GO:0006098	pentose-phosphate shunt	Biological process	12	0.000817428	1.88999	30	848	1192	63681	0.0140714
GO:0051156	glucose 6-phosphate metabolic process	Biological process	6	0.000912332	1.87671	30	854	1192	63681	0.0153757
GO:0006873	cellular ion homeostasis	Biological process	7	0.00773607	1.61727	30	991	1192	63681	0.0698274
GO:0046486	glycerolipid metabolic process	Biological process	6	0.0350671	1.42717	30	1123	1192	63681	0.184122
GO:0019751	polyol metabolic process	Biological process	6	3.83117e-07	2.92871	29	529	1192	63681	1.7756e-05
GO:0016036	cellular response to phosphate starvation	Biological process	8	0.000204333	2.08799	29	742	1192	63681	0.00460226
GO:0030968	endoplasmic reticulum unfolded protein response	Biological process	6	0.0321022	1.45938	28	1025	1192	63681	0.171925
GO:0034620	cellular response to unfolded protein	Biological process	7	0.0338101	1.45229	28	1030	1192	63681	0.179873
GO:0006986	response to unfolded protein	Biological process	6	0.0338101	1.45229	28	1030	1192	63681	0.179873
GO:0035967	cellular response to topologically incorrect protein	Biological process	6	0.0338101	1.45229	28	1030	1192	63681	0.179873
GO:1901659	glycosyl compound biosynthetic process	Biological process	6	0.0429807	1.41922	28	1054	1192	63681	0.208838
GO:0042180	cellular ketone metabolic process	Biological process	5	0.00147047	1.88801	27	764	1192	63681	0.022149
GO:0009311	oligosaccharide metabolic process	Biological process	6	0.0120099	1.60628	27	898	1192	63681	0.0904494
GO:0044106	cellular amine metabolic process	Biological process	6	0.0123297	1.60271	27	900	1192	63681	0.0925688
GO:0030003	cellular cation homeostasis	Biological process	8	0.0198248	1.53778	27	938	1192	63681	0.125401
GO:0010310	regulation of hydrogen peroxide metabolic process	Biological process	7	0.0416879	1.43384	27	1006	1192	63681	0.204203
GO:0015294	solute:cation symporter activity	Molecular function	7	2.67277e-06	2.83724	26	510	1065	59271	0.000633447
GO:0015293	symporter activity	Molecular function	6	3.78766e-06	2.78268	26	520	1065	59271	0.00071814
GO:0042631	cellular response to water deprivation	Biological process	7	3.39834e-07	3.17127	26	438	1192	63681	1.638e-05
GO:0071462	cellular response to water stimulus	Biological process	6	3.39834e-07	3.17127	26	438	1192	63681	1.638e-05
GO:0009658	chloroplast organization	Biological process	6	0.0370626	1.46212	26	950	1192	63681	0.191676
GO:0009695	jasmonic acid biosynthetic process	Biological process	10	0.00164107	1.92726	25	693	1192	63681	0.0242637
GO:0007568	aging	Biological process	4	0.0229565	1.54582	25	864	1192	63681	0.134285
GO:0005984	disaccharide metabolic process	Biological process	7	0.0212709	1.57321	24	815	1192	63681	0.128479
GO:0006576	cellular biogenic amine metabolic process	Biological process	7	0.0306359	1.51736	24	845	1192	63681	0.166289
GO:0006818	hydrogen transport	Biological process	6	0.0491081	1.44388	24	888	1192	63681	0.229807
GO:0015992	proton transport	Biological process	8	0.0491081	1.44388	24	888	1192	63681	0.229807
GO:0009108	coenzyme biosynthetic process	Biological process	6	0.00532538	1.80698	23	680	1192	63681	0.0532538
GO:0045730	respiratory burst	Biological process	4	0.00550997	1.80168	23	682	1192	63681	0.0544222
GO:0002679	respiratory burst involved in defense response	Biological process	5	0.00550997	1.80168	23	682	1192	63681	0.0544222
GO:0016616	oxidoreductase activity, acting on the CH-OH group of donors, NAD or NADP as acceptor	Molecular function	5	0.0210537	1.61102	22	760	1065	59271	0.120963
GO:0010103	stomatal complex morphogenesis	Biological process	5	0.00258379	1.95236	22	602	1192	63681	0.0329467
GO:0009668	plastid membrane organization	Biological process	6	0.0293353	1.55672	22	755	1192	63681	0.162524
GO:0010027	thylakoid membrane organization	Biological process	7	0.0293353	1.55672	22	755	1192	63681	0.162524
GO:0050897	cobalt ion binding	Molecular function	7	8.16376e-09	4.63779	21	252	1065	59271	7.73924e-06
GO:0051119	sugar transmembrane transporter activity	Molecular function	6	0.000120422	2.52971	21	462	1065	59271	0.00475668
GO:0015144	carbohydrate transmembrane transporter activity	Molecular function	5	0.000348104	2.33745	21	500	1065	59271	0.00750006
GO:1901476	carbohydrate transporter activity	Molecular function	3	0.000348104	2.33745	21	500	1065	59271	0.00750006
GO:0019842	vitamin binding	Molecular function	4	0.000592385	2.24323	21	521	1065	59271	0.0114608
GO:0046527	glucosyltransferase activity	Molecular function	6	0.0196189	1.64377	21	711	1065	59271	0.114103
GO:0009064	glutamine family amino acid metabolic process	Biological process	10	2.66749e-08	4.33165	21	259	1192	63681	2.38098e-06
GO:0009749	response to glucose	Biological process	8	0.00037841	2.32277	21	483	1192	63681	0.00741437
GO:0046488	phosphatidylinositol metabolic process	Biological process	8	0.00446464	1.8951	21	592	1192	63681	0.0498139
GO:0009735	response to cytokinin	Biological process	6	0.0285059	1.58014	21	710	1192	63681	0.159395
GO:0009850	auxin metabolic process	Biological process	6	0.0469225	1.49387	21	751	1192	63681	0.223927
GO:0005351	sugar:proton symporter activity	Molecular function	9	2.16832e-05	2.94463	20	378	1065	59271	0.00205557
GO:0005402	cation:sugar symporter activity	Molecular function	8	2.16832e-05	2.94463	20	378	1065	59271	0.00205557
GO:0015295	solute:proton symporter activity	Molecular function	8	4.46845e-05	2.79666	20	398	1065	59271	0.00264756
GO:0070279	vitamin B6 binding	Molecular function	5	5.68249e-05	2.74832	20	405	1065	59271	0.00299278
GO:0030170	pyridoxal phosphate binding	Molecular function	6	5.68249e-05	2.74832	20	405	1065	59271	0.00299278
GO:0036293	response to decreased oxygen levels	Biological process	5	0.00166232	2.10744	20	507	1192	63681	0.0241336
GO:0070482	response to oxygen levels	Biological process	4	0.00174006	2.09916	20	509	1192	63681	0.0246679
GO:0015995	chlorophyll biosynthetic process	Biological process	8	0.00505134	1.90799	20	560	1192	63681	0.051366
GO:0009310	amine catabolic process	Biological process	6	0.0217458	1.64888	20	648	1192	63681	0.129401
GO:0042402	cellular biogenic amine catabolic process	Biological process	8	0.0217458	1.64888	20	648	1192	63681	0.129401
GO:0006779	porphyrin-containing compound biosynthetic process	Biological process	7	0.0271699	1.60915	20	664	1192	63681	0.154432
GO:0033014	tetrapyrrole biosynthetic process	Biological process	6	0.0339944	1.56898	20	681	1192	63681	0.179663
GO:0046982	protein heterodimerization activity	Molecular function	5	0.00201223	2.11907	19	499	1065	59271	0.0238449
GO:0009081	branched-chain amino acid metabolic process	Biological process	9	6.33327e-12	7.74847	19	131	1192	63681	1.09023e-09
GO:0046149	pigment catabolic process	Biological process	5	8.42213e-08	4.43253	19	229	1192	63681	5.48577e-06
GO:0007031	peroxisome organization	Biological process	5	0.00593702	1.91519	19	530	1192	63681	0.0570049
GO:0052545	callose localization	Biological process	5	0.015125	1.74108	19	583	1192	63681	0.10721
GO:0006664	glycolipid metabolic process	Biological process	7	0.0153695	1.7381	19	584	1192	63681	0.108306
GO:0015980	energy derivation by oxidation of organic compounds	Biological process	5	0.0182684	1.70597	19	595	1192	63681	0.121621
GO:0010207	photosystem II assembly	Biological process	8	0.0188382	1.70025	19	597	1192	63681	0.120745
GO:1903509	liposaccharide metabolic process	Biological process	5	0.0188382	1.70025	19	597	1192	63681	0.120745
GO:0033037	polysaccharide localization	Biological process	4	0.0194216	1.69457	19	599	1192	63681	0.123174
GO:0000325	plant-type vacuole	Cellular component	7	0.0430939	1.5669	18	612	1359	72400	0.354958
GO:0015996	chlorophyll catabolic process	Biological process	8	3.35907e-07	4.25498	18	226	1192	63681	1.65212e-05
GO:0033015	tetrapyrrole catabolic process	Biological process	6	6.74104e-07	4.05749	18	237	1192	63681	2.80102e-05
GO:0051187	cofactor catabolic process	Biological process	5	6.74104e-07	4.05749	18	237	1192	63681	2.80102e-05
GO:0006787	porphyrin-containing compound catabolic process	Biological process	7	6.74104e-07	4.05749	18	237	1192	63681	2.80102e-05
GO:0043647	inositol phosphate metabolic process	Biological process	7	0.000344468	2.53727	18	379	1192	63681	0.0068609
GO:0006766	vitamin metabolic process	Biological process	5	0.000930857	2.32839	18	413	1192	63681	0.0155789
GO:0001666	response to hypoxia	Biological process	6	0.00516265	1.98273	18	485	1192	63681	0.0522772
GO:0009684	indoleacetic acid biosynthetic process	Biological process	10	0.0282665	1.64944	18	583	1192	63681	0.158424
GO:0009683	indoleacetic acid metabolic process	Biological process	9	0.0295103	1.641	18	586	1192	63681	0.162746
GO:0035251	UDP-glucosyltransferase activity	Molecular function	7	0.0172766	1.7784	17	532	1065	59271	0.106352
GO:0015297	antiporter activity	Molecular function	6	0.0209009	1.73917	17	544	1065	59271	0.120817
GO:0016627	oxidoreductase activity, acting on the CH-CH group of donors	Molecular function	4	0.0419315	1.59546	17	593	1065	59271	0.192034
GO:0009646	response to absence of light	Biological process	7	5.96209e-09	5.89742	17	154	1192	63681	5.74746e-07
GO:0042744	hydrogen peroxide catabolic process	Biological process	6	0.00214694	2.21513	17	410	1192	63681	0.0287452
GO:0019375	galactolipid biosynthetic process	Biological process	9	0.0105495	1.88034	17	483	1192	63681	0.0825466
GO:0019374	galactolipid metabolic process	Biological process	8	0.0126873	1.8422	17	493	1192	63681	0.0949574
GO:0009247	glycolipid biosynthetic process	Biological process	8	0.0263907	1.69125	17	537	1192	63681	0.150358
GO:0045333	cellular respiration	Biological process	6	0.0344274	1.6364	17	555	1192	63681	0.181157
GO:0008483	transaminase activity	Molecular function	5	3.22802e-05	3.33504	16	267	1065	59271	0.00218583
GO:0016769	transferase activity, transferring nitrogenous groups	Molecular function	4	3.22802e-05	3.33504	16	267	1065	59271	0.00218583
GO:0043177	organic acid binding	Molecular function	4	0.000323407	2.73146	16	326	1065	59271	0.00806815
GO:0031406	carboxylic acid binding	Molecular function	5	0.000323407	2.73146	16	326	1065	59271	0.00806815
GO:0005342	organic acid transmembrane transporter activity	Molecular function	5	0.0022284	2.27157	16	392	1065	59271	0.0257625
GO:0046943	carboxylic acid transmembrane transporter activity	Molecular function	8	0.0022284	2.27157	16	392	1065	59271	0.0257625
GO:1901616	organic hydroxy compound catabolic process	Biological process	5	4.96591e-07	4.62042	16	185	1192	63681	2.25808e-05
GO:0043562	cellular response to nitrogen levels	Biological process	7	7.18286e-06	3.76554	16	227	1192	63681	0.000254569
GO:0043574	peroxisomal transport	Biological process	6	0.00485794	2.09505	16	408	1192	63681	0.0529757
GO:0015804	neutral amino acid transport	Biological process	10	0.00754416	1.99715	16	428	1192	63681	0.0693948
GO:0052542	defense response by callose deposition	Biological process	6	0.00837418	1.97408	16	433	1192	63681	0.0736561
GO:0009074	aromatic amino acid family catabolic process	Biological process	10	0.015274	1.8422	16	464	1192	63681	0.107949
GO:0022900	electron transport chain	Biological process	5	0.0289655	1.70275	16	502	1192	63681	0.160845
GO:0009624	response to nematode	Biological process	6	0.0358079	1.65655	16	516	1192	63681	0.18679
GO:0044743	protein transmembrane import into intracellular organelle	Biological process	11	0.0481693	1.59177	16	537	1192	63681	0.228071
GO:0016903	oxidoreductase activity, acting on the aldehyde or oxo group of donors	Molecular function	4	0.000626704	2.6671	15	313	1065	59271	0.0118823
GO:0050660	flavin adenine dinucleotide binding	Molecular function	6	0.0252932	1.76865	15	472	1065	59271	0.140222
GO:0009767	photosynthetic electron transport chain	Biological process	6	0.00189672	2.38498	15	336	1192	63681	0.0261205
GO:0008643	carbohydrate transport	Biological process	6	0.00237377	2.32952	15	344	1192	63681	0.0305925
GO:0015824	proline transport	Biological process	11	0.00604814	2.10329	15	381	1192	63681	0.0578414
GO:0009902	chloroplast relocation	Biological process	7	0.00846687	2.02362	15	396	1192	63681	0.0739318
GO:0051667	establishment of plastid localization	Biological process	6	0.00846687	2.02362	15	396	1192	63681	0.0739318
GO:0051644	plastid localization	Biological process	5	0.00922688	2.00339	15	400	1192	63681	0.076415
GO:0019750	chloroplast localization	Biological process	6	0.00922688	2.00339	15	400	1192	63681	0.076415
GO:0016558	protein import into peroxisome matrix	Biological process	12	0.00942506	1.99839	15	401	1192	63681	0.0772599
GO:0006625	protein targeting to peroxisome	Biological process	11	0.00983152	1.98847	15	403	1192	63681	0.07951
GO:0072663	establishment of protein localization to peroxisome	Biological process	8	0.00983152	1.98847	15	403	1192	63681	0.07951
GO:0072662	protein localization to peroxisome	Biological process	7	0.00983152	1.98847	15	403	1192	63681	0.07951
GO:0051656	establishment of organelle localization	Biological process	5	0.0190928	1.83376	15	437	1192	63681	0.121408
GO:0090693	plant organ senescence	Biological process	5	0.0216319	1.80485	15	444	1192	63681	0.130332
GO:0010150	leaf senescence	Biological process	6	0.0216319	1.80485	15	444	1192	63681	0.130332
GO:0016879	ligase activity, forming carbon-nitrogen bonds	Molecular function	4	0.00534293	2.20099	14	354	1065	59271	0.048239
GO:0016830	carbon-carbon lyase activity	Molecular function	4	0.0242694	1.82044	14	428	1065	59271	0.135338
GO:0009110	vitamin biosynthetic process	Biological process	6	5.94515e-05	3.49501	14	214	1192	63681	0.00149248
GO:0009773	photosynthetic electron transport in photosystem I	Biological process	7	6.25123e-05	3.47875	14	215	1192	63681	0.00155314
GO:0006914	autophagy	Biological process	5	0.00353062	2.30843	14	324	1192	63681	0.0419153
GO:0006661	phosphatidylinositol biosynthetic process	Biological process	9	0.0202512	1.86517	14	401	1192	63681	0.125787
GO:0016701	oxidoreductase activity, acting on single donors with incorporation of molecular oxygen	Molecular function	4	1.23924e-05	4.30652	13	168	1065	59271	0.00130534
GO:0031977	thylakoid lumen	Cellular component	5	0.00271258	2.47346	13	280	1359	72400	0.0606456
GO:0006541	glutamine metabolic process	Biological process	11	4.0148e-08	7.08681	13	98	1192	63681	3.12119e-06
GO:0046164	alcohol catabolic process	Biological process	6	1.20797e-05	4.31371	13	161	1192	63681	0.000393406
GO:0009269	response to desiccation	Biological process	7	0.000224218	3.24536	13	214	1192	63681	0.00495748
GO:0051240	positive regulation of multicellular organismal process	Biological process	5	0.0138468	2.01892	13	344	1192	63681	0.100515
GO:0051094	positive regulation of developmental process	Biological process	5	0.0263742	1.84709	13	376	1192	63681	0.150621
GO:0010029	regulation of seed germination	Biological process	8	0.0316145	1.79924	13	386	1192	63681	0.17045
GO:1900140	regulation of seedling development	Biological process	7	0.0421847	1.72334	13	403	1192	63681	0.206217
GO:0016597	amino acid binding	Molecular function	6	5.80989e-05	3.97525	12	168	1065	59271	0.00275389
GO:0016810	hydrolase activity, acting on carbon-nitrogen (but not peptide) bonds	Molecular function	4	0.00892001	2.21875	12	301	1065	59271	0.0650474
GO:0031978	plastid thylakoid lumen	Cellular component	6	0.000908849	2.94605	12	217	1359	72400	0.056894
GO:0009543	chloroplast thylakoid lumen	Cellular component	7	0.000908849	2.94605	12	217	1359	72400	0.056894
GO:0009631	cold acclimation	Biological process	6	1.32276e-05	4.61211	12	139	1192	63681	0.0004087
GO:0006814	sodium ion transport	Biological process	8	0.000783955	2.99572	12	214	1192	63681	0.0135923
GO:0032880	regulation of protein localization	Biological process	5	0.00229858	2.63821	12	243	1192	63681	0.0301063
GO:0033517	myo-inositol hexakisphosphate metabolic process	Biological process	8	0.00502899	2.3921	12	268	1192	63681	0.0515739
GO:0010264	myo-inositol hexakisphosphate biosynthetic process	Biological process	9	0.00502899	2.3921	12	268	1192	63681	0.0515739
GO:0032958	inositol phosphate biosynthetic process	Biological process	8	0.00532777	2.37438	12	270	1192	63681	0.0530575
GO:0046173	polyol biosynthetic process	Biological process	7	0.0111843	2.15129	12	298	1192	63681	0.0863916
GO:0048582	positive regulation of post-embryonic development	Biological process	7	0.014184	2.08144	12	308	1192	63681	0.10204
GO:0008361	regulation of cell size	Biological process	6	0.0189537	1.99715	12	321	1192	63681	0.120842
GO:0009410	response to xenobiotic stimulus	Biological process	4	0.0263573	1.90233	12	337	1192	63681	0.150882
GO:0006855	drug transmembrane transport	Biological process	7	0.0376514	1.8008	12	356	1192	63681	0.189436
GO:0015893	drug transport	Biological process	6	0.047904	1.73266	12	370	1192	63681	0.227261
GO:0015925	galactosidase activity	Molecular function	6	4.23108e-06	5.66841	11	108	1065	59271	0.000668511
GO:0016620	oxidoreductase activity, acting on the aldehyde or oxo group of donors, NAD or NADP as acceptor	Molecular function	5	0.00213169	2.80821	11	218	1065	59271	0.0249487
GO:0006551	leucine metabolic process	Biological process	10	1.32893e-10	14.6915	11	40	1192	63681	2.0017e-08
GO:0009061	anaerobic respiration	Biological process	7	3.14126e-10	13.6665	11	43	1192	63681	4.45319e-08
GO:0044275	cellular carbohydrate catabolic process	Biological process	6	0.00028816	3.58329	11	164	1192	63681	0.00603883
GO:1901661	quinone metabolic process	Biological process	6	0.000632764	3.26478	11	180	1192	63681	0.0117305
GO:1901663	quinone biosynthetic process	Biological process	7	0.000632764	3.26478	11	180	1192	63681	0.0117305
GO:0042181	ketone biosynthetic process	Biological process	6	0.000632764	3.26478	11	180	1192	63681	0.0117305
GO:0042793	transcription from plastid promoter	Biological process	11	0.00633447	2.42835	11	242	1192	63681	0.0603402
GO:0016702	oxidoreductase activity, acting on single donors with incorporation of molecular oxygen, incorporation of two atoms of oxygen	Molecular function	5	5.30325e-05	4.75671	10	117	1065	59271	0.00295734
GO:0004712	protein serine/threonine/tyrosine kinase activity	Molecular function	7	0.00686062	2.52971	10	220	1065	59271	0.0580703
GO:0005102	receptor binding	Molecular function	4	0.0109186	2.3582	10	236	1065	59271	0.0755534
GO:0090484	drug transporter activity	Molecular function	3	0.03829	1.91909	10	290	1065	59271	0.184259
GO:0046174	polyol catabolic process	Biological process	7	0.000178931	4.10951	10	130	1192	63681	0.00406814
GO:0006995	cellular response to nitrogen starvation	Biological process	8	0.00223094	2.96798	10	180	1192	63681	0.0295416
GO:0043648	dicarboxylic acid metabolic process	Biological process	8	0.014178	2.26371	10	236	1192	63681	0.102303
GO:0009610	response to symbiotic fungus	Biological process	7	0.0261684	2.14649	9	224	1192	63681	0.150157
GO:0009312	oligosaccharide biosynthetic process	Biological process	7	0.0295632	2.09962	9	229	1192	63681	0.161558
GO:0009608	response to symbiont	Biological process	6	0.0295632	2.09962	9	229	1192	63681	0.161558
GO:0043424	protein histidine kinase binding	Molecular function	7	9.79218e-05	5.56535	8	80	1065	59271	0.00421954
GO:0004565	beta-galactosidase activity	Molecular function	7	0.000241494	4.89262	8	91	1065	59271	0.00715427
GO:0016645	oxidoreductase activity, acting on the CH-NH group of donors	Molecular function	4	0.00097243	3.97525	8	112	1065	59271	0.0148688
GO:0006552	leucine catabolic process	Biological process	11	6.81921e-12	35.6158	8	12	1192	63681	1.09562e-09
GO:0009083	branched-chain amino acid catabolic process	Biological process	10	5.62535e-09	18.5821	8	23	1192	63681	5.64879e-07
GO:0015718	monocarboxylic acid transport	Biological process	9	0.00278771	3.36527	8	127	1192	63681	0.0353599
GO:0055081	anion homeostasis	Biological process	7	0.00524984	3.03113	8	141	1192	63681	0.0529377
GO:1905039	carboxylic acid transmembrane transport	Biological process	9	0.0112816	2.65459	8	161	1192	63681	0.0868648
GO:1903825	organic acid transmembrane transport	Biological process	7	0.0112816	2.65459	8	161	1192	63681	0.0868648
GO:0046351	disaccharide biosynthetic process	Biological process	8	0.0219572	2.34829	8	182	1192	63681	0.130017
GO:0003995	acyl-CoA dehydrogenase activity	Molecular function	5	3.84695e-07	14.4287	7	27	1065	59271	0.000121564
GO:0004029	aldehyde dehydrogenase (NAD) activity	Molecular function	6	2.6388e-05	7.9505	7	49	1065	59271	0.00192429
GO:0009975	cyclase activity	Molecular function	3	0.00236452	3.85717	7	101	1065	59271	0.0263713
GO:0016857	racemase and epimerase activity, acting on carbohydrates and derivatives	Molecular function	5	0.00509543	3.3584	7	116	1065	59271	0.0468977
GO:0016790	thiolester hydrolase activity	Molecular function	5	0.00896049	3.01996	7	129	1065	59271	0.0648438
GO:0016854	racemase and epimerase activity	Molecular function	4	0.01569	2.70538	7	144	1065	59271	0.101184
GO:0004806	triglyceride lipase activity	Molecular function	6	0.0162386	2.68672	7	145	1065	59271	0.103317
GO:0042360	vitamin E metabolic process	Biological process	7	2.83237e-07	14.9586	7	25	1192	63681	1.45234e-05
GO:0010189	vitamin E biosynthetic process	Biological process	8	2.83237e-07	14.9586	7	25	1192	63681	1.45234e-05
GO:0042362	fat-soluble vitamin biosynthetic process	Biological process	7	5.06419e-07	13.8506	7	27	1192	63681	2.26013e-05
GO:0006775	fat-soluble vitamin metabolic process	Biological process	6	5.06419e-07	13.8506	7	27	1192	63681	2.26013e-05
GO:0009065	glutamine family amino acid catabolic process	Biological process	11	0.000128782	6.23276	7	60	1192	63681	0.00313499
GO:0033500	carbohydrate homeostasis	Biological process	6	0.0008263	4.61686	7	81	1192	63681	0.0141233
GO:0009970	cellular response to sulfate starvation	Biological process	8	0.000955417	4.50561	7	83	1192	63681	0.0158797
GO:0006012	galactose metabolic process	Biological process	8	0.00388061	3.52798	7	106	1192	63681	0.04518
GO:0010229	inflorescence development	Biological process	7	0.00900409	3.01585	7	124	1192	63681	0.0766779
GO:0006749	glutathione metabolic process	Biological process	7	0.00938833	2.99172	7	125	1192	63681	0.0772214
GO:2000280	regulation of root development	Biological process	6	0.0486748	2.1248	7	176	1192	63681	0.228222
GO:0004028	3-chloroallyl aldehyde dehydrogenase activity	Molecular function	6	0.000333956	6.42156	6	52	1065	59271	0.00753786
GO:0008453	alanine-glyoxylate transaminase activity	Molecular function	6	0.000370909	6.3004	6	53	1065	59271	0.00764394
GO:1901618	organic hydroxy compound transmembrane transporter activity	Molecular function	4	0.000727334	5.56535	6	60	1065	59271	0.0127687
GO:0015174	basic amino acid transmembrane transporter activity	Molecular function	10	0.000943269	5.30034	6	63	1065	59271	0.0159682
GO:0016405	CoA-ligase activity	Molecular function	5	0.0172417	2.92913	6	114	1065	59271	0.106831
GO:0016878	acid-thiol ligase activity	Molecular function	5	0.0224017	2.75968	6	121	1065	59271	0.125662
GO:0019203	carbohydrate phosphatase activity	Molecular function	7	0.028511	2.60876	6	128	1065	59271	0.152703
GO:0043617	cellular response to sucrose starvation	Biological process	8	1.83996e-07	21.3695	6	15	1192	63681	9.85402e-06
GO:0042593	glucose homeostasis	Biological process	7	0.00116374	5.08797	6	63	1192	63681	0.0183309
GO:0015770	sucrose transport	Biological process	9	0.00116374	5.08797	6	63	1192	63681	0.0183309
GO:0055062	phosphate ion homeostasis	Biological process	9	0.00173268	4.71385	6	68	1192	63681	0.0250046
GO:0055083	monovalent inorganic anion homeostasis	Biological process	8	0.00173268	4.71385	6	68	1192	63681	0.0250046
GO:0072506	trivalent inorganic anion homeostasis	Biological process	8	0.00173268	4.71385	6	68	1192	63681	0.0250046
GO:0009082	branched-chain amino acid biosynthetic process	Biological process	10	0.00216271	4.51468	6	71	1192	63681	0.0287964
GO:0006536	glutamate metabolic process	Biological process	11	0.00370225	4.05749	6	79	1192	63681	0.0437373
GO:0072505	divalent inorganic anion homeostasis	Biological process	8	0.00418934	3.95731	6	81	1192	63681	0.0480777
GO:0015766	disaccharide transport	Biological process	8	0.00472219	3.86195	6	83	1192	63681	0.0519657
GO:0015772	oligosaccharide transport	Biological process	7	0.00472219	3.86195	6	83	1192	63681	0.0519657
GO:0015850	organic hydroxy compound transport	Biological process	6	0.00661979	3.60159	6	89	1192	63681	0.0615973
GO:0046838	phosphorylated carbohydrate dephosphorylation	Biological process	7	0.0104234	3.27084	6	98	1192	63681	0.0829056
GO:0046855	inositol phosphate dephosphorylation	Biological process	9	0.0104234	3.27084	6	98	1192	63681	0.0829056
GO:0071545	inositol phosphate catabolic process	Biological process	8	0.0104234	3.27084	6	98	1192	63681	0.0829056
GO:0006071	glycerol metabolic process	Biological process	8	0.0104234	3.27084	6	98	1192	63681	0.0829056
GO:0005991	trehalose metabolic process	Biological process	8	0.0119785	3.17368	6	101	1192	63681	0.090496
GO:0019400	alditol metabolic process	Biological process	7	0.0162277	2.96798	6	108	1192	63681	0.113359
GO:0007186	G-protein coupled receptor signaling pathway	Biological process	6	0.0285991	2.60603	6	123	1192	63681	0.159177
GO:0010540	basipetal auxin transport	Biological process	9	0.0395923	2.41009	6	133	1192	63681	0.19473
GO:0003997	acyl-CoA oxidase activity	Molecular function	6	5.93639e-05	11.5945	5	24	1065	59271	0.00267985
GO:0005343	organic acid:sodium symporter activity	Molecular function	11	0.000129331	9.93813	5	28	1065	59271	0.00490424
GO:0008506	sucrose:proton symporter activity	Molecular function	10	0.000213845	8.97637	5	31	1065	59271	0.00653952
GO:0015370	solute:sodium symporter activity	Molecular function	10	0.000334957	8.18434	5	34	1065	59271	0.00738464
GO:0022821	potassium ion antiporter activity	Molecular function	10	0.00112754	6.32426	5	44	1065	59271	0.0159538
GO:0047617	acyl-CoA hydrolase activity	Molecular function	7	0.0012499	6.18372	5	45	1065	59271	0.0171725
GO:0010294	abscisic acid glucosyltransferase activity	Molecular function	8	0.0030719	5.05941	5	55	1065	59271	0.0327209
GO:0016634	oxidoreductase activity, acting on the CH-CH group of donors, oxygen as acceptor	Molecular function	5	0.00387203	4.79772	5	58	1065	59271	0.0378421
GO:0008515	sucrose transmembrane transporter activity	Molecular function	8	0.00387203	4.79772	5	58	1065	59271	0.0378421
GO:0015296	anion:cation symporter activity	Molecular function	8	0.00630042	4.28104	5	65	1065	59271	0.0563472
GO:0004805	trehalose-phosphatase activity	Molecular function	8	0.00671805	4.21618	5	66	1065	59271	0.0573758
GO:0015154	disaccharide transmembrane transporter activity	Molecular function	7	0.00761067	4.09217	5	68	1065	59271	0.0638488
GO:0016289	CoA hydrolase activity	Molecular function	6	0.00761067	4.09217	5	68	1065	59271	0.0638488
GO:0016646	oxidoreductase activity, acting on the CH-NH group of donors, NAD or NADP as acceptor	Molecular function	5	0.00808652	4.03286	5	69	1065	59271	0.0660864
GO:0015145	monosaccharide transmembrane transporter activity	Molecular function	7	0.00808652	4.03286	5	69	1065	59271	0.0660864
GO:0005310	dicarboxylic acid transmembrane transporter activity	Molecular function	9	0.0085826	3.97525	5	70	1065	59271	0.0635649
GO:0015157	oligosaccharide transmembrane transporter activity	Molecular function	6	0.0107773	3.76037	5	74	1065	59271	0.0756809
GO:0005778	peroxisomal membrane	Cellular component	8	0.0286553	2.92717	5	91	1359	72400	0.280285
GO:0031903	microbody membrane	Cellular component	7	0.0286553	2.92717	5	91	1359	72400	0.280285
GO:0044438	microbody part	Cellular component	5	0.0420183	2.63735	5	101	1359	72400	0.365326
GO:0044439	peroxisomal part	Cellular component	6	0.0420183	2.63735	5	101	1359	72400	0.365326
GO:0030863	cortical cytoskeleton	Cellular component	7	0.0498977	2.51295	5	106	1359	72400	0.400461
GO:1900618	regulation of shoot system morphogenesis	Biological process	7	0.000301479	8.34745	5	32	1192	63681	0.00626348
GO:1905428	regulation of plant organ formation	Biological process	6	0.000301479	8.34745	5	32	1192	63681	0.00626348
GO:0006020	inositol metabolic process	Biological process	7	0.00165387	5.80692	5	46	1192	63681	0.0243038
GO:0015749	monosaccharide transport	Biological process	7	0.0101244	3.81598	5	70	1192	63681	0.0810621
GO:0005992	trehalose biosynthetic process	Biological process	9	0.0319911	2.84168	5	94	1192	63681	0.172095
GO:0009900	dehiscence	Biological process	4	0.0332674	2.81177	5	95	1192	63681	0.177377
GO:0010304	PSII associated light-harvesting complex II catabolic process	Biological process	8	0.0359139	2.7538	5	97	1192	63681	0.186939
GO:0032957	inositol trisphosphate metabolic process	Biological process	8	0.0372844	2.7257	5	98	1192	63681	0.188772
GO:0005983	starch catabolic process	Biological process	9	0.0372844	2.7257	5	98	1192	63681	0.188772
GO:0009251	glucan catabolic process	Biological process	7	0.0493953	2.51998	5	106	1192	63681	0.229812
GO:0044247	cellular polysaccharide catabolic process	Biological process	7	0.0493953	2.51998	5	106	1192	63681	0.229812

## Sheet: GO terms for down-regulated
GO_ID	GO_Name	Class	GO_Level	P_value	EnrichmentScore	HitsGenesCountsInSelectedSet	HitsGenesCountsInBackground	AllGenesCountsInSelectedSet	AllGenesCountsInBackground	corrected p-value(BH method)
GO:0044699	single-organism process	Biological process	2	0.000109164	1.12499	304	43455	396	63681	0.000850833
GO:0005737	cytoplasm	Cellular component	4	0.000550166	1.13922	269	41494	412	72400	0.00235936
GO:0050896	response to stimulus	Biological process	2	1.1767e-06	1.25155	235	30195	396	63681	1.61289e-05
GO:0044444	cytoplasmic part	Cellular component	4	0.000479057	1.17022	233	34989	412	72400	0.0020947
GO:0044763	single-organism cellular process	Biological process	3	0.00111658	1.16806	214	29462	396	63681	0.00675045
GO:0016020	membrane	Cellular component	2	1.62444e-09	1.42258	197	24335	412	72400	1.449e-08
GO:0044710	single-organism metabolic process	Biological process	3	0.00102214	1.20027	183	24518	396	63681	0.00620308
GO:0071944	cell periphery	Cellular component	3	0	1.86539	181	17051	412	72400	0
GO:0006950	response to stress	Biological process	3	1.69142e-08	1.43775	172	19238	396	63681	3.78783e-07
GO:0042221	response to chemical	Biological process	3	4.64775e-09	1.46725	170	18632	396	63681	1.21146e-07
GO:0009628	response to abiotic stimulus	Biological process	3	4.44089e-16	1.9434	166	13736	396	63681	6.41911e-14
GO:0044767	single-organism developmental process	Biological process	3	4.53951e-06	1.36732	154	18112	396	63681	5.30723e-05
GO:0032502	developmental process	Biological process	2	1.73307e-05	1.33654	154	18529	396	63681	0.000181288
GO:0048856	anatomical structure development	Biological process	3	9.40533e-06	1.35284	153	18187	396	63681	0.000107586
GO:0032501	multicellular organismal process	Biological process	2	3.12335e-06	1.38518	150	17414	396	63681	3.73392e-05
GO:0044707	single-multicellular organism process	Biological process	3	1.19958e-07	1.46479	148	16248	396	63681	2.0509e-06
GO:0051179	localization	Biological process	2	3.37848e-07	1.44423	147	16368	396	63681	5.21532e-06
GO:0007275	multicellular organism development	Biological process	4	9.47457e-08	1.47935	145	15762	396	63681	1.67384e-06
GO:0006810	transport	Biological process	4	3.77363e-08	1.50704	143	15259	396	63681	7.69239e-07
GO:0051234	establishment of localization	Biological process	3	1.20612e-07	1.48007	143	15537	396	63681	2.04015e-06
GO:0005886	plasma membrane	Cellular component	3	1.02366e-10	1.66117	140	14810	412	72400	9.92505e-10
GO:0043167	ion binding	Molecular function	3	0.0347464	1.13929	137	20077	355	59271	0.138985
GO:0071840	cellular component organization or biogenesis	Biological process	2	0.000103218	1.33296	134	16166	396	63681	0.000812459
GO:0044446	intracellular organelle part	Cellular component	4	1.20607e-06	1.48175	126	14943	412	72400	8.40479e-06
GO:0044422	organelle part	Cellular component	2	1.31902e-06	1.47927	126	14968	412	72400	8.91336e-06
GO:0005576	extracellular region	Cellular component	2	5.55112e-16	2.43402	122	8808	412	72400	1.03158e-14
GO:0044711	single-organism biosynthetic process	Biological process	4	4.16213e-05	1.39401	120	13843	396	63681	0.000373886
GO:0016043	cellular component organization	Biological process	3	0.000712041	1.30812	118	14506	396	63681	0.00454677
GO:0009507	chloroplast	Cellular component	7	0.000165028	1.3616	117	15100	412	72400	0.000783005
GO:0009536	plastid	Cellular component	6	0.000415606	1.33102	117	15447	412	72400	0.0018536
GO:0010035	response to inorganic substance	Biological process	4	0	2.50064	117	7524	396	63681	0
GO:0051716	cellular response to stimulus	Biological process	3	0.000849435	1.3064	116	14279	396	63681	0.00527579
GO:1901700	response to oxygen-containing compound	Biological process	4	1.78381e-06	1.50596	115	12280	396	63681	2.34401e-05
GO:0044281	small molecule metabolic process	Biological process	4	0.000644428	1.32981	110	13302	396	63681	0.00413161
GO:0005515	protein binding	Molecular function	3	0.0379832	1.16748	106	15159	355	59271	0.144811
GO:0036094	small molecule binding	Molecular function	3	0.000425458	1.35081	105	12978	355	59271	0.00532368
GO:0005829	cytosol	Cellular component	5	2.84495e-10	1.83615	105	10049	412	72400	2.64343e-09
GO:0000166	nucleotide binding	Molecular function	5	0.000276219	1.37837	101	12234	355	59271	0.00396455
GO:1901265	nucleoside phosphate binding	Molecular function	4	0.000276219	1.37837	101	12234	355	59271	0.00396455
GO:0005618	cell wall	Cellular component	4	0	5.16848	97	3298	412	72400	0
GO:0030312	external encapsulating structure	Cellular component	3	3.33067e-16	5.14352	97	3314	412	72400	8.25266e-15
GO:0006793	phosphorus metabolic process	Biological process	4	0.0280106	1.19952	96	12870	396	63681	0.10504
GO:0009605	response to external stimulus	Biological process	3	0.000155954	1.42749	95	10702	396	63681	0.00115872
GO:0012505	endomembrane system	Cellular component	3	5.61827e-11	1.99618	93	8187	412	72400	5.69489e-10
GO:0005975	carbohydrate metabolic process	Biological process	4	5.17204e-11	1.99325	93	7503	396	63681	2.41869e-09
GO:0009266	response to temperature stimulus	Biological process	4	3.33067e-16	2.97555	91	4918	396	63681	5.29576e-14
GO:0048731	system development	Biological process	4	0.0260014	1.2114	91	12080	396	63681	0.0986688
GO:0043168	anion binding	Molecular function	4	0.00155986	1.3456	89	11043	355	59271	0.013593
GO:0009791	post-embryonic development	Biological process	4	0.000427875	1.40771	89	10167	396	63681	0.00285849
GO:0017076	purine nucleotide binding	Molecular function	6	1.8255e-05	1.54527	86	9292	355	59271	0.000636317
GO:0097367	carbohydrate derivative binding	Molecular function	3	3.76942e-05	1.51542	86	9475	355	59271	0.000836127
GO:0035639	purine ribonucleoside triphosphate binding	Molecular function	5	6.55988e-06	1.5988	84	8772	355	59271	0.000400153
GO:0032555	purine ribonucleotide binding	Molecular function	7	3.36326e-05	1.53041	84	9164	355	59271	0.000820635
GO:0032553	ribonucleotide binding	Molecular function	6	6.33664e-05	1.5035	84	9328	355	59271	0.00128845
GO:0007154	cell communication	Biological process	3	0.036817	1.20414	84	11218	396	63681	0.131254
GO:0055044	symplast	Cellular component	2	0	2.70451	83	5393	412	72400	0
GO:0009506	plasmodesma	Cellular component	4	0	2.70451	83	5393	412	72400	0
GO:0005911	cell-cell junction	Cellular component	3	2.22045e-16	2.69951	83	5403	412	72400	9.90319e-15
GO:0030054	cell junction	Cellular component	2	2.22045e-16	2.69951	83	5403	412	72400	9.90319e-15
GO:0016787	hydrolase activity	Molecular function	3	0.0493486	1.1874	82	11530	355	59271	0.166083
GO:0005794	Golgi apparatus	Cellular component	6	3.44169e-15	2.58377	81	5509	412	72400	5.90382e-14
GO:0044765	single-organism transport	Biological process	5	1.56459e-08	1.88614	81	6906	396	63681	3.55387e-07
GO:1902578	single-organism localization	Biological process	3	2.40285e-08	1.86775	81	6974	396	63681	5.09403e-07
GO:0030554	adenyl nucleotide binding	Molecular function	7	1.92488e-05	1.58304	79	8332	355	59271	0.000626229
GO:0010038	response to metal ion	Biological process	5	0	3.472	79	3659	396	63681	0
GO:0043436	oxoacid metabolic process	Biological process	6	0.00579935	1.3173	79	9644	396	63681	0.0280273
GO:0006082	organic acid metabolic process	Biological process	5	0.00582943	1.31703	79	9646	396	63681	0.0280873
GO:0071702	organic substance transport	Biological process	5	0.000257579	1.47619	78	8497	396	63681	0.00182835
GO:0005524	ATP binding	Molecular function	9	6.56093e-06	1.64462	77	7817	355	59271	0.000355748
GO:0032559	adenyl ribonucleotide binding	Molecular function	8	3.7391e-05	1.56513	77	8214	355	59271	0.000868896
GO:1901135	carbohydrate derivative metabolic process	Biological process	4	6.85083e-08	1.88068	75	6413	396	63681	1.23782e-06
GO:0009056	catabolic process	Biological process	3	0.00189576	1.38965	75	8679	396	63681	0.0106136
GO:0019752	carboxylic acid metabolic process	Biological process	7	0.00715887	1.31798	75	9151	396	63681	0.0328977
GO:1901566	organonitrogen compound biosynthetic process	Biological process	5	0.0219243	1.2532	75	9624	396	63681	0.0865005
GO:0006970	response to osmotic stress	Biological process	4	1.80522e-13	2.51852	74	4725	396	63681	1.79394e-11
GO:0009416	response to light stimulus	Biological process	5	2.47406e-10	2.15971	74	5510	396	63681	9.59454e-09
GO:0009314	response to radiation	Biological process	4	2.01482e-09	2.05882	74	5780	396	63681	5.72065e-08
GO:0005773	vacuole	Cellular component	6	8.92619e-14	2.58424	73	4964	412	72400	1.24409e-12
GO:1901575	organic substance catabolic process	Biological process	4	5.83853e-05	1.57573	73	7450	396	63681	0.000504525
GO:0005739	mitochondrion	Cellular component	6	0.00363706	1.36753	72	9252	412	72400	0.0142292
GO:0033554	cellular response to stress	Biological process	4	1.88636e-05	1.63837	72	7067	396	63681	0.000193504
GO:0009651	response to salt stress	Biological process	5	3.74256e-13	2.54515	71	4486	396	63681	3.5004e-11
GO:0031090	organelle membrane	Cellular component	3	1.14164e-12	2.51399	70	4893	412	72400	1.27293e-11
GO:0071705	nitrogen compound transport	Biological process	5	0.00819204	1.32635	70	8487	396	63681	0.036899
GO:0032787	monocarboxylic acid metabolic process	Biological process	8	2.21667e-05	1.66036	68	6586	396	63681	0.000220282
GO:0001101	response to acid chemical	Biological process	4	0.0286529	1.25633	67	8576	396	63681	0.107196
GO:0048046	apoplast	Cellular component	3	3.33067e-16	5.60022	66	2071	412	72400	8.25266e-15
GO:0046686	response to cadmium ion	Biological process	6	0	3.53548	66	3002	396	63681	0
GO:0098588	bounding membrane of organelle	Cellular component	4	4.88498e-15	2.97379	65	3841	412	72400	7.78108e-14
GO:0009408	response to heat	Biological process	5	0	6.90859	65	1513	396	63681	0
GO:0044723	single-organism carbohydrate metabolic process	Biological process	5	1.60062e-06	1.82835	65	5717	396	63681	2.15676e-05
GO:0065008	regulation of biological quality	Biological process	3	1.85306e-06	1.82039	65	5742	396	63681	2.41506e-05
GO:0099402	plant organ development	Biological process	4	0.0010113	1.47055	65	7108	396	63681	0.00616078
GO:0044425	membrane part	Cellular component	2	0.0411851	1.2397	64	9072	412	72400	0.127559
GO:0019637	organophosphate metabolic process	Biological process	5	1.33473e-06	1.84939	64	5565	396	63681	1.81387e-05
GO:0006811	ion transport	Biological process	5	7.87017e-05	1.62281	64	6342	396	63681	0.000648371
GO:0033036	macromolecule localization	Biological process	3	0.000956911	1.47936	64	6957	396	63681	0.00587447
GO:0006457	protein folding	Biological process	3	0	7.8841	63	1285	396	63681	0
GO:0048869	cellular developmental process	Biological process	4	0.00132982	1.47097	62	6778	396	63681	0.00786027
GO:0044085	cellular component biogenesis	Biological process	3	0.00282686	1.42432	62	7000	396	63681	0.0152363
GO:0098805	whole membrane	Cellular component	3	7.22755e-14	2.9272	61	3662	412	72400	1.0745e-12
GO:0044437	vacuolar part	Cellular component	5	2.22045e-16	3.44115	60	3064	412	72400	9.90319e-15
GO:0005774	vacuolar membrane	Cellular component	6	4.44089e-16	3.46718	60	3041	412	72400	9.0029e-15
GO:0009117	nucleotide metabolic process	Biological process	8	3.3992e-11	2.54447	60	3792	396	63681	1.74346e-09
GO:0006753	nucleoside phosphate metabolic process	Biological process	7	4.01669e-11	2.53378	60	3808	396	63681	1.99579e-09
GO:0055086	nucleobase-containing small molecule metabolic process	Biological process	6	1.29172e-10	2.4595	60	3923	396	63681	5.40484e-09
GO:0071554	cell wall organization or biogenesis	Biological process	3	8.97781e-08	2.05816	60	4688	396	63681	1.6039e-06
GO:0044283	small molecule biosynthetic process	Biological process	5	0.00207144	1.46034	59	6497	396	63681	0.011516
GO:0043228	non-membrane-bounded organelle	Cellular component	3	2.88383e-07	2.02227	58	5040	412	72400	2.21756e-06
GO:0043232	intracellular non-membrane-bounded organelle	Cellular component	5	2.88383e-07	2.02227	58	5040	412	72400	2.21756e-06
GO:0031224	intrinsic component of membrane	Cellular component	3	0.00419751	1.42072	58	7174	412	72400	0.0156007
GO:0044712	single-organism catabolic process	Biological process	4	1.8633e-05	1.76247	58	5292	396	63681	0.00019238
GO:0030154	cell differentiation	Biological process	5	7.99382e-05	1.69179	56	5323	396	63681	0.000655164
GO:0043233	organelle lumen	Cellular component	3	8.03579e-13	2.97021	55	3254	412	72400	1.05411e-11
GO:0031974	membrane-enclosed lumen	Cellular component	2	8.03579e-13	2.97021	55	3254	412	72400	1.05411e-11
GO:0070013	intracellular organelle lumen	Cellular component	4	8.03579e-13	2.97021	55	3254	412	72400	1.05411e-11
GO:0019693	ribose phosphate metabolic process	Biological process	6	2.80503e-11	2.7663	53	3081	396	63681	1.48667e-09
GO:0005976	polysaccharide metabolic process	Biological process	5	2.02567e-09	2.45054	53	3478	396	63681	5.65055e-08
GO:0051186	cofactor metabolic process	Biological process	4	2.42488e-07	2.1154	53	4029	396	63681	3.8945e-06
GO:0016051	carbohydrate biosynthetic process	Biological process	6	4.98368e-07	2.06617	53	4125	396	63681	7.40565e-06
GO:0048367	shoot system development	Biological process	5	0.0421273	1.27687	51	6423	396	63681	0.145614
GO:0016491	oxidoreductase activity	Molecular function	3	0.0107698	1.39087	50	6002	355	59271	0.0541823
GO:0009259	ribonucleotide metabolic process	Biological process	9	6.42819e-14	3.40124	50	2364	396	63681	6.81388e-12
GO:0044434	chloroplast part	Cellular component	6	0.000378242	1.65781	49	5194	412	72400	0.00172139
GO:0044435	plastid part	Cellular component	5	0.000583344	1.62558	49	5297	412	72400	0.00245445
GO:0042886	amide transport	Biological process	6	0.0370622	1.29579	49	6081	396	63681	0.131832
GO:0050793	regulation of developmental process	Biological process	4	5.61844e-05	1.8094	48	4266	396	63681	0.000490841
GO:0006812	cation transport	Biological process	6	0.000405731	1.6835	46	4394	396	63681	0.00273353
GO:0005215	transporter activity	Molecular function	2	0.00532846	1.48131	45	5072	355	59271	0.03377
GO:0098542	defense response to other organism	Biological process	6	0.0371001	1.31334	45	5510	396	63681	0.131672
GO:0031981	nuclear lumen	Cellular component	6	4.62395e-09	2.6736	44	2892	412	72400	3.96593e-08
GO:0044428	nuclear part	Cellular component	5	1.12162e-06	2.19535	44	3522	412	72400	8.06846e-06
GO:0071555	cell wall organization	Biological process	5	2.84603e-07	2.30778	44	3066	396	63681	4.48038e-06
GO:0045229	external encapsulating structure organization	Biological process	4	2.18318e-06	2.13637	44	3312	396	63681	2.73328e-05
GO:0040007	growth	Biological process	2	0.0107186	1.4388	43	4806	396	63681	0.0464373
GO:0016052	carbohydrate catabolic process	Biological process	5	4.87896e-10	2.96881	42	2275	396	63681	1.55151e-08
GO:0006732	coenzyme metabolic process	Biological process	5	1.87274e-06	2.19787	42	3073	396	63681	2.40134e-05
GO:0009505	plant-type cell wall	Cellular component	5	2.22045e-16	5.17962	41	1391	412	72400	9.90319e-15
GO:0005730	nucleolus	Cellular component	6	4.56835e-12	3.53352	41	2039	412	72400	4.85115e-11
GO:0006979	response to oxidative stress	Biological process	4	1.22892e-07	2.47494	41	2664	396	63681	2.05682e-06
GO:0030001	metal ion transport	Biological process	7	6.528e-06	2.13631	40	3011	396	63681	7.57629e-05
GO:0009908	flower development	Biological process	7	0.0062202	1.51351	40	4250	396	63681	0.0297001
GO:0090567	reproductive shoot system development	Biological process	6	0.00747243	1.49626	40	4299	396	63681	0.0339462
GO:0022892	substrate-specific transporter activity	Molecular function	3	0.00179479	1.63687	39	3978	355	59271	0.015366
GO:0022857	transmembrane transporter activity	Molecular function	3	0.00293969	1.59088	39	4093	355	59271	0.0217359
GO:0006163	purine nucleotide metabolic process	Biological process	9	9.64837e-11	3.31306	39	1893	396	63681	4.14619e-09
GO:0072521	purine-containing compound metabolic process	Biological process	5	3.43086e-10	3.16908	39	1979	396	63681	1.26862e-08
GO:0006733	oxidoreduction coenzyme metabolic process	Biological process	6	2.49532e-08	2.70912	39	2315	396	63681	5.22046e-07
GO:0010817	regulation of hormone levels	Biological process	4	4.27065e-08	2.65409	39	2363	396	63681	8.38313e-07
GO:0006091	generation of precursor metabolites and energy	Biological process	4	8.72122e-06	2.13465	39	2938	396	63681	0.000100484
GO:0009617	response to bacterium	Biological process	6	0.000129933	1.88337	39	3330	396	63681	0.000983781
GO:1901698	response to nitrogen compound	Biological process	4	0.0123179	1.45682	39	4305	396	63681	0.0529335
GO:0006090	pyruvate metabolic process	Biological process	9	1.09781e-08	2.84223	38	2150	396	63681	2.56694e-07
GO:0044262	cellular carbohydrate metabolic process	Biological process	5	0.000603395	1.75699	38	3478	396	63681	0.00389999
GO:0009126	purine nucleoside monophosphate metabolic process	Biological process	9	1.3085e-11	3.70716	37	1605	396	63681	7.4304e-10
GO:0009167	purine ribonucleoside monophosphate metabolic process	Biological process	10	1.3085e-11	3.70716	37	1605	396	63681	7.4304e-10
GO:0009161	ribonucleoside monophosphate metabolic process	Biological process	9	4.74666e-11	3.54166	37	1680	396	63681	2.28703e-09
GO:0009123	nucleoside monophosphate metabolic process	Biological process	8	7.16943e-11	3.48973	37	1705	396	63681	3.1665e-09
GO:0009150	purine ribonucleotide metabolic process	Biological process	10	1.54703e-10	3.39418	37	1753	396	63681	6.30714e-09
GO:0046496	nicotinamide nucleotide metabolic process	Biological process	10	1.02387e-08	2.90102	37	2051	396	63681	2.46659e-07
GO:0019362	pyridine nucleotide metabolic process	Biological process	9	1.06321e-08	2.89678	37	2054	396	63681	2.52314e-07
GO:0072524	pyridine-containing compound metabolic process	Biological process	5	1.3984e-08	2.86608	37	2076	396	63681	3.22241e-07
GO:0044264	cellular polysaccharide metabolic process	Biological process	6	2.79058e-05	2.07317	37	2870	396	63681	0.00026729
GO:0048364	root development	Biological process	5	0.000532846	1.78518	37	3333	396	63681	0.00350093
GO:0022622	root system development	Biological process	5	0.000556782	1.7809	37	3341	396	63681	0.00362821
GO:0022891	substrate-specific transmembrane transporter activity	Molecular function	4	0.00107834	1.72817	36	3478	355	59271	0.0107394
GO:0044724	single-organism carbohydrate catabolic process	Biological process	6	2.6853e-09	3.11414	36	1859	396	63681	7.11604e-08
GO:0048589	developmental growth	Biological process	4	0.0178471	1.44441	36	4008	396	63681	0.0723902
GO:0046939	nucleotide phosphorylation	Biological process	9	1.60116e-12	4.19714	35	1341	396	63681	1.41436e-10
GO:0000302	response to reactive oxygen species	Biological process	5	2.14932e-10	3.50459	35	1606	396	63681	8.54353e-09
GO:0019748	secondary metabolic process	Biological process	4	0.00100905	1.75503	35	3207	396	63681	0.00617072
GO:1901137	carbohydrate derivative biosynthetic process	Biological process	5	0.00558795	1.57746	35	3568	396	63681	0.027338
GO:0009644	response to high light intensity	Biological process	7	5.77316e-15	5.2674	34	1038	396	63681	7.06102e-13
GO:0006096	glycolytic process	Biological process	13	1.65712e-12	4.30856	34	1269	396	63681	1.38675e-10
GO:0006757	ATP generation from ADP	Biological process	12	1.65712e-12	4.30856	34	1269	396	63681	1.38675e-10
GO:0009135	purine nucleoside diphosphate metabolic process	Biological process	9	1.69309e-12	4.30517	34	1270	396	63681	1.28191e-10
GO:0046031	ADP metabolic process	Biological process	11	1.69309e-12	4.30517	34	1270	396	63681	1.28191e-10
GO:0009179	purine ribonucleoside diphosphate metabolic process	Biological process	10	1.69309e-12	4.30517	34	1270	396	63681	1.28191e-10
GO:0009185	ribonucleoside diphosphate metabolic process	Biological process	9	1.69309e-12	4.30517	34	1270	396	63681	1.28191e-10
GO:0006165	nucleoside diphosphate phosphorylation	Biological process	10	2.43283e-12	4.2483	34	1287	396	63681	1.54728e-10
GO:0009642	response to light intensity	Biological process	6	2.59248e-12	4.23842	34	1290	396	63681	1.5854e-10
GO:0009132	nucleoside diphosphate metabolic process	Biological process	8	3.54938e-12	4.1897	34	1305	396	63681	2.09019e-10
GO:0046034	ATP metabolic process	Biological process	11	2.82547e-10	3.55036	34	1540	396	63681	1.06964e-08
GO:0009144	purine nucleoside triphosphate metabolic process	Biological process	9	3.8072e-10	3.50935	34	1558	396	63681	1.37578e-08
GO:0009205	purine ribonucleoside triphosphate metabolic process	Biological process	10	3.8072e-10	3.50935	34	1558	396	63681	1.37578e-08
GO:0009199	ribonucleoside triphosphate metabolic process	Biological process	9	8.5097e-10	3.40022	34	1608	396	63681	2.65302e-08
GO:0009141	nucleoside triphosphate metabolic process	Biological process	8	9.95386e-10	3.37921	34	1618	396	63681	3.04358e-08
GO:0034976	response to endoplasmic reticulum stress	Biological process	5	3.88642e-08	2.90982	34	1879	396	63681	7.82203e-07
GO:0006073	cellular glucan metabolic process	Biological process	7	2.22159e-07	2.70003	34	2025	396	63681	3.6795e-06
GO:0044042	glucan metabolic process	Biological process	6	2.22159e-07	2.70003	34	2025	396	63681	3.6795e-06
GO:0006790	sulfur compound metabolic process	Biological process	4	0.00746681	1.5586	34	3508	396	63681	0.0340179
GO:1901615	organic hydroxy compound metabolic process	Biological process	4	0.012612	1.50125	34	3642	396	63681	0.0537614
GO:0048827	phyllome development	Biological process	5	0.042593	1.36314	34	4011	396	63681	0.146586
GO:0016462	pyrophosphatase activity	Molecular function	6	0.00649907	1.5837	33	3479	355	59271	0.0368784
GO:0016818	hydrolase activity, acting on acid anhydrides, in phosphorus-containing anhydrides	Molecular function	5	0.00789416	1.56215	33	3527	355	59271	0.0428039
GO:0016817	hydrolase activity, acting on acid anhydrides	Molecular function	4	0.0088866	1.54897	33	3557	355	59271	0.0451736
GO:0031967	organelle envelope	Cellular component	5	0.0294931	1.41509	33	4098	412	72400	0.09672
GO:0031975	envelope	Cellular component	3	0.0305449	1.41096	33	4110	412	72400	0.0987175
GO:0042742	defense response to bacterium	Biological process	7	6.14325e-05	2.09753	33	2530	396	63681	0.000527987
GO:0009409	response to cold	Biological process	5	0.00476092	1.62088	33	3274	396	63681	0.0238797
GO:0006820	anion transport	Biological process	6	0.00575666	1.59986	33	3317	396	63681	0.0279057
GO:0090407	organophosphate biosynthetic process	Biological process	6	0.0071294	1.57611	33	3367	396	63681	0.0328572
GO:1901565	organonitrogen compound catabolic process	Biological process	5	0.0399223	1.37838	33	3850	396	63681	0.139509
GO:0017111	nucleoside-triphosphatase activity	Molecular function	7	0.00587082	1.60877	32	3321	355	59271	0.0345176
GO:1990904	ribonucleoprotein complex	Cellular component	3	3.61712e-05	2.19061	32	2567	412	72400	0.000187585
GO:0030529	intracellular ribonucleoprotein complex	Cellular component	4	3.61712e-05	2.19061	32	2567	412	72400	0.000187585
GO:0042542	response to hydrogen peroxide	Biological process	6	2.33147e-15	5.85431	32	879	396	63681	3.0892e-13
GO:0048580	regulation of post-embryonic development	Biological process	6	4.45694e-05	2.16398	32	2378	396	63681	0.00039812
GO:0048229	gametophyte development	Biological process	5	9.40496e-05	2.07833	32	2476	396	63681	0.000762954
GO:2000026	regulation of multicellular organismal development	Biological process	5	0.000325638	1.93748	32	2656	396	63681	0.00226098
GO:0051239	regulation of multicellular organismal process	Biological process	4	0.000775584	1.83981	32	2797	396	63681	0.00491306
GO:0019318	hexose metabolic process	Biological process	7	1.1331e-07	2.95503	31	1687	396	63681	1.9583e-06
GO:0005996	monosaccharide metabolic process	Biological process	6	2.40375e-06	2.55517	31	1951	396	63681	2.93997e-05
GO:0071669	plant-type cell wall organization or biogenesis	Biological process	4	0.000265673	1.98611	31	2510	396	63681	0.00187742
GO:0035556	intracellular signal transduction	Biological process	6	0.0183346	1.49077	31	3344	396	63681	0.074178
GO:0010015	root morphogenesis	Biological process	5	0.000313393	1.99352	30	2420	396	63681	0.00218551
GO:0000271	polysaccharide biosynthetic process	Biological process	7	0.0014092	1.81297	30	2661	396	63681	0.00820742
GO:0005840	ribosome	Cellular component	6	5.95644e-06	2.53791	29	2008	412	72400	3.58996e-05
GO:0072330	monocarboxylic acid biosynthetic process	Biological process	9	0.0260811	1.46928	29	3174	396	63681	0.0985011
GO:0090351	seedling development	Biological process	5	5.92415e-09	3.65776	28	1231	396	63681	1.51926e-07
GO:0010256	endomembrane system organization	Biological process	4	7.43452e-09	3.73014	27	1164	396	63681	1.84701e-07
GO:0009845	seed germination	Biological process	4	1.0035e-08	3.67645	27	1181	396	63681	2.45471e-07
GO:0006006	glucose metabolic process	Biological process	8	1.68762e-06	2.83228	27	1533	396	63681	2.23609e-05
GO:1901617	organic hydroxy compound biosynthetic process	Biological process	5	0.0168229	1.55345	27	2795	396	63681	0.068762
GO:0016887	ATPase activity	Molecular function	8	0.000218155	2.16832	26	2002	355	59271	0.00332687
GO:0015075	ion transmembrane transporter activity	Molecular function	5	0.0243087	1.51517	26	2865	355	59271	0.104979
GO:0009570	chloroplast stroma	Cellular component	7	0.0221169	1.53114	26	2984	412	72400	0.0758781
GO:0009532	plastid stroma	Cellular component	6	0.0274478	1.50047	26	3045	412	72400	0.0927402
GO:1900140	regulation of seedling development	Biological process	7	0	10.3749	26	403	396	63681	0
GO:0051093	negative regulation of developmental process	Biological process	5	1.56541e-14	7.01523	26	596	396	63681	1.77786e-12
GO:0007030	Golgi organization	Biological process	5	2.41332e-09	4.07115	26	1027	396	63681	6.61583e-08
GO:0009414	response to water deprivation	Biological process	6	0.00335095	1.79215	26	2333	396	63681	0.0178194
GO:0009415	response to water	Biological process	5	0.00382587	1.7739	26	2357	396	63681	0.0199447
GO:0008289	lipid binding	Molecular function	3	4.95506e-09	4.06032	25	1028	355	59271	8.06023e-07
GO:0009526	plastid envelope	Cellular component	6	0.0149442	1.60336	25	2740	412	72400	0.0528978
GO:0010029	regulation of seed germination	Biological process	8	0	10.4152	25	386	396	63681	0
GO:0042044	fluid transport	Biological process	6	3.86412e-10	4.62099	25	870	396	63681	1.33564e-08
GO:0006833	water transport	Biological process	7	3.86412e-10	4.62099	25	870	396	63681	1.33564e-08
GO:0019319	hexose biosynthetic process	Biological process	8	7.23949e-09	3.99232	25	1007	396	63681	1.82711e-07
GO:0046364	monosaccharide biosynthetic process	Biological process	7	2.2303e-08	3.76782	25	1067	396	63681	4.79213e-07
GO:0009664	plant-type cell wall organization	Biological process	6	0.000505706	2.08953	25	1924	396	63681	0.0033364
GO:0010053	root epidermal cell differentiation	Biological process	7	0.000607813	2.06273	25	1949	396	63681	0.00391264
GO:0090627	plant epidermal cell differentiation	Biological process	6	0.000935852	2.00013	25	2010	396	63681	0.00576746
GO:1901605	alpha-amino acid metabolic process	Biological process	9	0.037728	1.46671	25	2741	396	63681	0.133603
GO:0009941	chloroplast envelope	Cellular component	7	0.0148456	1.62273	24	2599	412	72400	0.0533964
GO:0006094	gluconeogenesis	Biological process	9	2.10701e-08	3.91425	24	986	396	63681	4.58923e-07
GO:0009165	nucleotide biosynthetic process	Biological process	9	1.74003e-05	2.66353	24	1449	396	63681	0.000180826
GO:1901293	nucleoside phosphate biosynthetic process	Biological process	8	1.92114e-05	2.64709	24	1458	396	63681	0.000195808
GO:0015698	inorganic anion transport	Biological process	7	2.18911e-05	2.62548	24	1470	396	63681	0.000218911
GO:0010054	trichoblast differentiation	Biological process	8	0.000806038	2.05728	24	1876	396	63681	0.00506562
GO:0009743	response to carbohydrate	Biological process	5	0.00344318	1.83959	24	2098	396	63681	0.018128
GO:0048437	floral organ development	Biological process	5	0.0352544	1.49071	24	2589	396	63681	0.127108
GO:0022626	cytosolic ribosome	Cellular component	7	1.17278e-05	2.80677	23	1440	412	72400	6.53823e-05
GO:0044445	cytosolic part	Cellular component	5	2.52972e-05	2.67135	23	1513	412	72400	0.000137592
GO:0042546	cell wall biogenesis	Biological process	4	0.000554869	2.15539	23	1716	396	63681	0.00363062
GO:0009826	unidimensional cell growth	Biological process	7	0.0403349	1.48421	23	2492	396	63681	0.140334
GO:0010118	stomatal movement	Biological process	4	1.19e-09	4.96887	22	712	396	63681	3.57e-08
GO:0070838	divalent metal ion transport	Biological process	8	1.42626e-05	2.8485	22	1242	396	63681	0.000156397
GO:0072511	divalent inorganic cation transport	Biological process	7	1.64998e-05	2.82124	22	1254	396	63681	0.00017374
GO:0048438	floral whorl development	Biological process	4	0.0191312	1.62212	22	2181	396	63681	0.0768147
GO:0051082	unfolded protein binding	Molecular function	4	0	11.6484	21	301	355	59271	0
GO:0044459	plasma membrane part	Cellular component	3	1.4827e-06	3.41378	21	1081	412	72400	9.72474e-06
GO:0010167	response to nitrate	Biological process	5	1.10338e-05	2.98852	21	1130	396	63681	0.000124424
GO:0009411	response to UV	Biological process	6	4.86877e-05	2.6973	21	1252	396	63681	0.000430075
GO:0042446	hormone biosynthetic process	Biological process	6	0.000242969	2.39845	21	1408	396	63681	0.00173238
GO:0042445	hormone metabolic process	Biological process	5	0.00159027	2.06672	21	1634	396	63681	0.00919466
GO:0048764	trichoblast maturation	Biological process	6	0.00420321	1.90041	21	1777	396	63681	0.0216984
GO:0048765	root hair cell differentiation	Biological process	8	0.00420321	1.90041	21	1777	396	63681	0.0216984
GO:0048469	cell maturation	Biological process	5	0.00436449	1.89401	21	1783	396	63681	0.0223856
GO:0048366	leaf development	Biological process	6	0.0317289	1.55767	21	2168	396	63681	0.116242
GO:0044429	mitochondrial part	Cellular component	5	0.00016059	2.54494	20	1381	412	72400	0.000778514
GO:0008202	steroid metabolic process	Biological process	5	3.27528e-05	2.8614	20	1124	396	63681	0.000308147
GO:0044550	secondary metabolite biosynthetic process	Biological process	5	0.00383873	1.95277	20	1647	396	63681	0.0199464
GO:0031668	cellular response to extracellular stimulus	Biological process	5	0.0219375	1.64344	20	1957	396	63681	0.086338
GO:0071496	cellular response to external stimulus	Biological process	4	0.0226729	1.63758	20	1964	396	63681	0.0883575
GO:0009991	response to extracellular stimulus	Biological process	4	0.0312452	1.58045	20	2035	396	63681	0.115
GO:0005507	copper ion binding	Molecular function	7	7.85575e-05	2.76569	19	1147	355	59271	0.00141985
GO:0010187	negative regulation of seed germination	Biological process	9	0	29.0991	19	105	396	63681	0
GO:0048581	negative regulation of post-embryonic development	Biological process	7	5.55244e-11	7.02391	19	435	396	63681	2.52239e-09
GO:0051241	negative regulation of multicellular organismal process	Biological process	5	4.37781e-10	6.21017	19	492	396	63681	1.42055e-08
GO:0009825	multidimensional cell growth	Biological process	5	2.05094e-08	4.89648	19	624	396	63681	4.52916e-07
GO:0009561	megagametogenesis	Biological process	4	6.01633e-07	3.92725	19	778	396	63681	8.77612e-06
GO:0009698	phenylpropanoid metabolic process	Biological process	5	2.16674e-05	3.05235	19	1001	396	63681	0.000219435
GO:0006694	steroid biosynthetic process	Biological process	6	2.51169e-05	3.01917	19	1012	396	63681	0.000246518
GO:0009553	embryo sac development	Biological process	6	3.52954e-05	2.94355	19	1038	396	63681	0.000328185
GO:0015706	nitrate transport	Biological process	8	0.000103577	2.71109	19	1127	396	63681	0.000811265
GO:0019725	cellular homeostasis	Biological process	5	0.00566787	1.92043	19	1591	396	63681	0.0276439
GO:0009639	response to red or far red light	Biological process	6	0.0394498	1.55888	19	1960	396	63681	0.138161
GO:0043473	pigmentation	Biological process	3	6.66586e-08	4.79237	18	604	396	63681	1.29253e-06
GO:0043476	pigment accumulation	Biological process	4	6.66586e-08	4.79237	18	604	396	63681	1.29253e-06
GO:0043478	pigment accumulation in response to UV light	Biological process	7	6.66586e-08	4.79237	18	604	396	63681	1.29253e-06
GO:0043479	pigment accumulation in tissues in response to UV light	Biological process	8	6.66586e-08	4.79237	18	604	396	63681	1.29253e-06
GO:0043480	pigment accumulation in tissues	Biological process	5	6.66586e-08	4.79237	18	604	396	63681	1.29253e-06
GO:0043481	anthocyanin accumulation in tissues in response to UV light	Biological process	9	6.66586e-08	4.79237	18	604	396	63681	1.29253e-06
GO:0006869	lipid transport	Biological process	6	1.07951e-07	4.63877	18	624	396	63681	1.88617e-06
GO:0010876	lipid localization	Biological process	4	0.000127722	2.75675	18	1050	396	63681	0.000971662
GO:0006972	hyperosmotic response	Biological process	5	0.00587841	1.95448	18	1481	396	63681	0.0282377
GO:0044036	cell wall macromolecule metabolic process	Biological process	6	0.008176	1.88942	18	1532	396	63681	0.0369313
GO:0009267	cellular response to starvation	Biological process	7	0.014434	1.778	18	1628	396	63681	0.0607146
GO:0042594	response to starvation	Biological process	6	0.0164732	1.75217	18	1652	396	63681	0.067506
GO:0031669	cellular response to nutrient levels	Biological process	6	0.0217685	1.69771	18	1705	396	63681	0.0860992
GO:0031667	response to nutrient levels	Biological process	5	0.0310831	1.628	18	1778	396	63681	0.114669
GO:0016853	isomerase activity	Molecular function	3	6.53743e-05	3.0195	17	940	355	59271	0.00127611
GO:0031226	intrinsic component of plasma membrane	Cellular component	4	3.03256e-08	5.38266	17	555	412	72400	2.41522e-07
GO:0090332	stomatal closure	Biological process	5	2.22045e-16	17.7518	17	154	396	63681	3.92279e-14
GO:0006816	calcium ion transport	Biological process	9	1.62167e-06	4.03808	17	677	396	63681	2.16677e-05
GO:0009750	response to fructose	Biological process	8	1.57619e-05	3.39179	17	806	396	63681	0.000167076
GO:0009746	response to hexose	Biological process	7	9.41152e-05	2.93324	17	932	396	63681	0.00075961
GO:0009260	ribonucleotide biosynthetic process	Biological process	10	0.000127262	2.8596	17	956	396	63681	0.000982267
GO:0046390	ribose phosphate biosynthetic process	Biological process	7	0.000127262	2.8596	17	956	396	63681	0.000982267
GO:0034284	response to monosaccharide	Biological process	6	0.000133683	2.84769	17	960	396	63681	0.00100737
GO:0010383	cell wall polysaccharide metabolic process	Biological process	7	0.00113063	2.35468	17	1161	396	63681	0.00680949
GO:0000041	transition metal ion transport	Biological process	8	0.00314733	2.13243	17	1282	396	63681	0.0168493
GO:0009932	cell tip growth	Biological process	8	0.0454568	1.57657	17	1734	396	63681	0.154767
GO:0034220	ion transmembrane transport	Biological process	6	0.0485154	1.56305	17	1749	396	63681	0.164476
GO:0019899	enzyme binding	Molecular function	4	3.16377e-05	3.35178	16	797	355	59271	0.00081259
GO:0004553	hydrolase activity, hydrolyzing O-glycosyl compounds	Molecular function	5	0.0112172	1.90676	16	1401	355	59271	0.055293
GO:0016798	hydrolase activity, acting on glycosyl bonds	Molecular function	4	0.0191917	1.78926	16	1493	355	59271	0.0859223
GO:0042623	ATPase activity, coupled	Molecular function	9	0.0228018	1.75172	16	1525	355	59271	0.100246
GO:0031225	anchored component of membrane	Cellular component	4	2.55607e-05	3.4205	16	822	412	72400	0.000135715
GO:0098791	Golgi subcompartment	Cellular component	6	0.00578249	2.0568	16	1367	412	72400	0.0211393
GO:0044431	Golgi apparatus part	Cellular component	5	0.0192601	1.79086	16	1570	412	72400	0.0671094
GO:0009310	amine catabolic process	Biological process	6	4.05005e-06	3.97063	16	648	396	63681	4.80565e-05
GO:0042402	cellular biogenic amine catabolic process	Biological process	8	4.05005e-06	3.97063	16	648	396	63681	4.80565e-05
GO:0006576	cellular biogenic amine metabolic process	Biological process	7	9.83204e-05	3.04493	16	845	396	63681	0.000781647
GO:0042430	indole-containing compound metabolic process	Biological process	5	0.000138703	2.95404	16	871	396	63681	0.00104027
GO:0044106	cellular amine metabolic process	Biological process	6	0.000200167	2.85886	16	900	396	63681	0.00145327
GO:0009832	plant-type cell wall biogenesis	Biological process	5	0.000304776	2.75184	16	935	396	63681	0.00214422
GO:0048767	root hair elongation	Biological process	6	0.00126514	2.40464	16	1070	396	63681	0.00753397
GO:0034285	response to disaccharide	Biological process	6	0.00159763	2.34974	16	1095	396	63681	0.00920372
GO:0009744	response to sucrose	Biological process	7	0.00159763	2.34974	16	1095	396	63681	0.00920372
GO:0080147	root hair cell development	Biological process	6	0.00298947	2.20477	16	1167	396	63681	0.0160583
GO:0009308	amine metabolic process	Biological process	5	0.00335217	2.17864	16	1181	396	63681	0.0177665
GO:0048467	gynoecium development	Biological process	5	0.00484489	2.09525	16	1228	396	63681	0.0242244
GO:0009812	flavonoid metabolic process	Biological process	4	0.00570982	2.05838	16	1250	396	63681	0.0277633
GO:1901657	glycosyl compound metabolic process	Biological process	5	0.0150166	1.84442	16	1395	396	63681	0.0628327
GO:0048878	chemical homeostasis	Biological process	5	0.0491999	1.58532	16	1623	396	63681	0.162975
GO:0008509	anion transmembrane transporter activity	Molecular function	6	0.00211524	2.3582	15	1062	355	59271	0.0169219
GO:0016758	transferase activity, transferring hexosyl groups	Molecular function	5	0.0445001	1.6358	15	1531	355	59271	0.157363
GO:0010286	heat acclimation	Biological process	6	2.99688e-07	5.19862	15	464	396	63681	4.6716e-06
GO:0009218	pyrimidine ribonucleotide metabolic process	Biological process	10	2.69338e-05	3.57887	15	674	396	63681	0.000262729
GO:0009220	pyrimidine ribonucleotide biosynthetic process	Biological process	11	2.69338e-05	3.57887	15	674	396	63681	0.000262729
GO:0016126	sterol biosynthetic process	Biological process	7	3.57344e-05	3.49082	15	691	396	63681	0.000330336
GO:0006220	pyrimidine nucleotide metabolic process	Biological process	9	3.81407e-05	3.47073	15	695	396	63681	0.000350541
GO:0006221	pyrimidine nucleotide biosynthetic process	Biological process	10	3.81407e-05	3.47073	15	695	396	63681	0.000350541
GO:0009735	response to cytokinin	Biological process	6	4.84824e-05	3.39741	15	710	396	63681	0.000430654
GO:0016125	sterol metabolic process	Biological process	6	5.08235e-05	3.38311	15	713	396	63681	0.00044646
GO:0042435	indole-containing compound biosynthetic process	Biological process	6	6.9128e-05	3.2908	15	733	396	63681	0.000581553
GO:0072528	pyrimidine-containing compound biosynthetic process	Biological process	6	7.12422e-05	3.28185	15	735	396	63681	0.000596185
GO:0072527	pyrimidine-containing compound metabolic process	Biological process	5	9.70978e-05	3.19069	15	756	396	63681	0.000775806
GO:0030243	cellulose metabolic process	Biological process	9	0.000165108	3.03798	15	794	396	63681	0.00122103
GO:0009615	response to virus	Biological process	6	0.000326877	2.84789	15	847	396	63681	0.00225972
GO:0051273	beta-glucan metabolic process	Biological process	8	0.000360441	2.82124	15	855	396	63681	0.00247026
GO:0006200	obsolete ATP catabolic process	Biological process	0	0.00418053	2.19287	15	1100	396	63681	0.0216516
GO:0019757	glycosinolate metabolic process	Biological process	7	0.00464653	2.16726	15	1113	396	63681	0.0236038
GO:0019760	glucosinolate metabolic process	Biological process	8	0.00464653	2.16726	15	1113	396	63681	0.0236038
GO:0016143	S-glycoside metabolic process	Biological process	6	0.00464653	2.16726	15	1113	396	63681	0.0236038
GO:0048440	carpel development	Biological process	6	0.00659616	2.08304	15	1158	396	63681	0.0311213
GO:0032879	regulation of localization	Biological process	4	0.00732145	2.05816	15	1172	396	63681	0.0334515
GO:0050801	ion homeostasis	Biological process	6	0.0250628	1.76974	15	1363	396	63681	0.0955633
GO:0009250	glucan biosynthetic process	Biological process	9	0.0328496	1.70712	15	1413	396	63681	0.119521
GO:0046658	anchored component of plasma membrane	Cellular component	5	6.05996e-09	7.71221	14	319	412	72400	5.00508e-08
GO:0009684	indoleacetic acid biosynthetic process	Biological process	10	2.1865e-05	3.86166	14	583	396	63681	0.000220034
GO:0009683	indoleacetic acid metabolic process	Biological process	9	2.31238e-05	3.84189	14	586	396	63681	0.000228366
GO:0009851	auxin biosynthetic process	Biological process	7	7.73498e-05	3.43193	14	656	396	63681	0.000640553
GO:0009850	auxin metabolic process	Biological process	6	0.000308765	2.9978	14	751	396	63681	0.00216271
GO:0034754	cellular hormone metabolic process	Biological process	6	0.000866546	2.69623	14	835	396	63681	0.00536112
GO:1901659	glycosyl compound biosynthetic process	Biological process	6	0.00692304	2.136	14	1054	396	63681	0.0321861
GO:0009813	flavonoid biosynthetic process	Biological process	5	0.0100395	2.04111	14	1103	396	63681	0.043854
GO:0055080	cation homeostasis	Biological process	7	0.0228719	1.83484	14	1227	396	63681	0.0889151
GO:0009069	serine family amino acid metabolic process	Biological process	10	0.0377961	1.71075	14	1316	396	63681	0.133546
GO:0022838	substrate-specific channel activity	Molecular function	6	7.86092e-06	4.54077	13	478	355	59271	0.000383613
GO:0022803	passive transmembrane transporter activity	Molecular function	4	8.77798e-06	4.49376	13	483	355	59271	0.000356971
GO:0015267	channel activity	Molecular function	5	8.77798e-06	4.49376	13	483	355	59271	0.000356971
GO:0042335	cuticle development	Biological process	4	1.35705e-09	9.67842	13	216	396	63681	3.99575e-08
GO:0045488	pectin metabolic process	Biological process	7	1.3755e-05	4.31039	13	485	396	63681	0.00015294
GO:0010393	galacturonan metabolic process	Biological process	6	1.3755e-05	4.31039	13	485	396	63681	0.00015294
GO:0010106	cellular response to iron ion starvation	Biological process	8	0.00012734	3.46116	13	604	396	63681	0.000973413
GO:0006826	iron ion transport	Biological process	9	0.000169505	3.36099	13	622	396	63681	0.00124775
GO:0048481	plant ovule development	Biological process	5	0.00156116	2.64291	13	791	396	63681	0.0090593
GO:0035670	plant-type ovary development	Biological process	5	0.00174204	2.60991	13	801	396	63681	0.00989227
GO:0000160	phosphorelay signal transduction system	Biological process	7	0.00183877	2.59372	13	806	396	63681	0.0103676
GO:0019758	glycosinolate biosynthetic process	Biological process	8	0.00495899	2.30489	13	907	396	63681	0.0245632
GO:0019761	glucosinolate biosynthetic process	Biological process	9	0.00495899	2.30489	13	907	396	63681	0.0245632
GO:0016144	S-glycoside biosynthetic process	Biological process	7	0.00495899	2.30489	13	907	396	63681	0.0245632
GO:0006873	cellular ion homeostasis	Biological process	7	0.00998876	2.10952	13	991	396	63681	0.0437524
GO:0055082	cellular chemical homeostasis	Biological process	6	0.0160974	1.97968	13	1056	396	63681	0.0661366
GO:0004871	signal transducer activity	Molecular function	2	0.0469811	1.73766	12	1153	355	59271	0.159214
GO:0009736	cytokinin-activated signaling pathway	Biological process	7	1.12512e-05	4.75302	12	406	396	63681	0.000125982
GO:0071368	cellular response to cytokinin stimulus	Biological process	7	1.50058e-05	4.61657	12	418	396	63681	0.000163419
GO:0031163	metallo-sulfur cluster assembly	Biological process	5	1.53631e-05	4.60555	12	419	396	63681	0.000165049
GO:0016226	iron-sulfur cluster assembly	Biological process	6	1.53631e-05	4.60555	12	419	396	63681	0.000165049
GO:0060918	auxin transport	Biological process	7	0.000189755	3.5343	12	546	396	63681	0.001384
GO:0009914	hormone transport	Biological process	6	0.000234963	3.45211	12	559	396	63681	0.00168285
GO:1901606	alpha-amino acid catabolic process	Biological process	10	0.00642891	2.32217	12	831	396	63681	0.0305133
GO:0043543	protein acylation	Biological process	8	0.00678764	2.30553	12	837	396	63681	0.03193
GO:0009063	cellular amino acid catabolic process	Biological process	9	0.00709849	2.29184	12	842	396	63681	0.0328099
GO:0035266	meristem growth	Biological process	5	0.00984313	2.19287	12	880	396	63681	0.0433534
GO:0030003	cellular cation homeostasis	Biological process	8	0.0155403	2.05728	12	938	396	63681	0.0643467
GO:0051049	regulation of transport	Biological process	5	0.0231304	1.94138	12	994	396	63681	0.0897007
GO:0005982	starch metabolic process	Biological process	8	0.0354458	1.81878	12	1061	396	63681	0.127509
GO:0001510	RNA methylation	Biological process	9	0.0447061	1.7527	12	1101	396	63681	0.152538
GO:0000038	very long-chain fatty acid metabolic process	Biological process	10	5.94645e-07	7.07567	11	250	396	63681	8.7545e-06
GO:0000741	karyogamy	Biological process	6	1.85879e-06	6.29508	11	281	396	63681	2.40283e-05
GO:0048284	organelle fusion	Biological process	5	2.20312e-06	6.18502	11	286	396	63681	2.73668e-05
GO:0019722	calcium-mediated signaling	Biological process	8	2.20312e-06	6.18502	11	286	396	63681	2.73668e-05
GO:0019932	second-messenger-mediated signaling	Biological process	7	2.71826e-05	4.72972	11	374	396	63681	0.000261942
GO:0009808	lignin metabolic process	Biological process	6	5.69222e-05	4.35694	11	406	396	63681	0.00049457
GO:0070585	protein localization to mitochondrion	Biological process	7	6.21107e-05	4.31443	11	410	396	63681	0.000530947
GO:0006626	protein targeting to mitochondrion	Biological process	11	6.21107e-05	4.31443	11	410	396	63681	0.000530947
GO:0072655	establishment of protein localization to mitochondrion	Biological process	8	6.21107e-05	4.31443	11	410	396	63681	0.000530947
GO:0006997	nucleus organization	Biological process	5	0.000115638	4.02027	11	440	396	63681	0.000896896
GO:0007005	mitochondrion organization	Biological process	5	0.000333544	3.55204	11	498	396	63681	0.00229582
GO:0009926	auxin polar transport	Biological process	8	0.000470536	3.40832	11	519	396	63681	0.00313035
GO:0006839	mitochondrial transport	Biological process	6	0.00119043	3.03938	11	582	396	63681	0.00711574
GO:0009963	positive regulation of flavonoid biosynthetic process	Biological process	7	0.00127379	3.01349	11	587	396	63681	0.0075572
GO:0009962	regulation of flavonoid biosynthetic process	Biological process	6	0.0036759	2.62451	11	674	396	63681	0.0192259
GO:0010075	regulation of meristem growth	Biological process	6	0.0155123	2.13896	11	827	396	63681	0.0643981
GO:0032535	regulation of cellular component size	Biological process	5	0.0222244	2.02393	11	874	396	63681	0.0872512
GO:0090066	regulation of anatomical structure size	Biological process	4	0.0222244	2.02393	11	874	396	63681	0.0872512
GO:0044802	single-organism membrane organization	Biological process	5	0.0296383	1.93324	11	915	396	63681	0.110105
GO:0061024	membrane organization	Biological process	4	0.0349466	1.88183	11	940	396	63681	0.126284
GO:0002020	protease binding	Molecular function	5	2.53464e-12	28.2984	10	59	355	59271	6.18452e-10
GO:0016627	oxidoreductase activity, acting on the CH-CH group of donors	Molecular function	4	0.00336658	2.81552	10	593	355	59271	0.0234699
GO:0043492	ATPase activity, coupled to movement of substances	Molecular function	10	0.0374812	1.92795	10	866	355	59271	0.145165
GO:0042626	ATPase activity, coupled to transmembrane movement of substances	Molecular function	11	0.0374812	1.92795	10	866	355	59271	0.145165
GO:0016820	hydrolase activity, acting on acid anhydrides, catalyzing transmembrane movement of substances	Molecular function	5	0.0389688	1.91469	10	872	355	59271	0.146283
GO:0005759	mitochondrial matrix	Cellular component	6	4.85009e-06	6.39011	10	275	412	72400	3.00436e-05
GO:0008361	regulation of cell size	Biological process	6	3.88104e-05	5.00968	10	321	396	63681	0.00035262
GO:0046218	indolalkylamine catabolic process	Biological process	9	0.00039159	3.76606	10	427	396	63681	0.0026608
GO:0006569	tryptophan catabolic process	Biological process	11	0.00039159	3.76606	10	427	396	63681	0.0026608
GO:0048825	cotyledon development	Biological process	7	0.000406092	3.7485	10	429	396	63681	0.00272441
GO:0009074	aromatic amino acid family catabolic process	Biological process	10	0.000741717	3.46575	10	464	396	63681	0.00471732
GO:0042436	indole-containing compound catabolic process	Biological process	6	0.000844057	3.407	10	472	396	63681	0.00526294
GO:0006568	tryptophan metabolic process	Biological process	10	0.00161235	3.12254	10	515	396	63681	0.0092217
GO:0006586	indolalkylamine metabolic process	Biological process	8	0.00161235	3.12254	10	515	396	63681	0.0092217
GO:0010114	response to red light	Biological process	7	0.00249148	2.93986	10	547	396	63681	0.0136132
GO:0009699	phenylpropanoid biosynthetic process	Biological process	6	0.0154161	2.2397	10	718	396	63681	0.0641664
GO:0022412	cellular process involved in reproduction in multicellular organism	Biological process	4	0.0206532	2.1356	10	753	396	63681	0.0827169
GO:0009668	plastid membrane organization	Biological process	6	0.0209873	2.12994	10	755	396	63681	0.0838437
GO:0010027	thylakoid membrane organization	Biological process	7	0.0209873	2.12994	10	755	396	63681	0.0838437
GO:0080167	response to karrikin	Biological process	4	0.0266821	2.04594	10	786	396	63681	0.100532
GO:0048511	rhythmic process	Biological process	2	0.0298019	2.00762	10	801	396	63681	0.110455
GO:0007623	circadian rhythm	Biological process	3	0.0298019	2.00762	10	801	396	63681	0.110455
GO:0043269	regulation of ion transport	Biological process	6	0.0315675	1.98777	10	809	396	63681	0.115918
GO:0005372	water transmembrane transporter activity	Molecular function	5	2.65805e-07	10.3631	9	145	355	59271	3.24282e-05
GO:0015250	water channel activity	Molecular function	7	2.65805e-07	10.3631	9	145	355	59271	3.24282e-05
GO:0032440	2-alkenal reductase [NAD(P)] activity	Molecular function	6	6.88169e-05	5.21752	9	288	355	59271	0.00129164
GO:0016628	oxidoreductase activity, acting on the CH-CH group of donors, NAD or NADP as acceptor	Molecular function	5	0.000866345	3.692	9	407	355	59271	0.00960855
GO:0030599	pectinesterase activity	Molecular function	6	0.00107803	3.57773	9	420	355	59271	0.01096
GO:0046527	glucosyltransferase activity	Molecular function	6	0.028824	2.11342	9	711	355	59271	0.120223
GO:0052689	carboxylic ester hydrolase activity	Molecular function	5	0.0437519	1.95402	9	769	355	59271	0.155846
GO:0008544	epidermis development	Biological process	5	2.25804e-07	10.5642	9	137	396	63681	3.66356e-06
GO:0060429	epithelium development	Biological process	5	3.65742e-07	9.98135	9	145	396	63681	5.59163e-06
GO:0071248	cellular response to metal ion	Biological process	6	3.39963e-05	5.72054	9	253	396	63681	0.000317965
GO:0071241	cellular response to inorganic substance	Biological process	5	9.18814e-05	5.02533	9	288	396	63681	0.000749186
GO:0009612	response to mechanical stimulus	Biological process	4	0.000179821	4.59459	9	315	396	63681	0.00131758
GO:0009560	embryo sac egg cell differentiation	Biological process	6	0.00845379	2.61245	9	554	396	63681	0.0379704
GO:0007292	female gamete generation	Biological process	5	0.0146088	2.38434	9	607	396	63681	0.0612874
GO:0000156	phosphorelay response regulator activity	Molecular function	3	6.19349e-06	8.34803	8	160	355	59271	0.000431775
GO:0051592	response to calcium ion	Biological process	6	4.08775e-08	16.0811	8	80	396	63681	8.12441e-07
GO:0010197	polar nucleus fusion	Biological process	7	2.74569e-07	12.6126	8	102	396	63681	4.36565e-06
GO:0009559	embryo sac central cell differentiation	Biological process	6	4.58019e-07	11.8026	8	109	396	63681	6.93571e-06
GO:0009913	epidermal cell differentiation	Biological process	7	1.08219e-06	10.545	8	122	396	63681	1.50938e-05
GO:0030855	epithelial cell differentiation	Biological process	6	1.08219e-06	10.545	8	122	396	63681	1.50938e-05
GO:0006473	protein acetylation	Biological process	9	7.45021e-05	5.90131	8	218	396	63681	0.000620201
GO:0052546	cell wall pectin metabolic process	Biological process	8	0.000230115	5.00578	8	257	396	63681	0.00165558
GO:0009816	defense response to bacterium, incompatible interaction	Biological process	8	0.000479723	4.48253	8	287	396	63681	0.00317817
GO:0009060	aerobic respiration	Biological process	7	0.00180163	3.64443	8	353	396	63681	0.0101943
GO:0045595	regulation of cell differentiation	Biological process	5	0.00944191	2.75479	8	467	396	63681	0.0419347
GO:0009749	response to glucose	Biological process	8	0.0113892	2.66353	8	483	396	63681	0.0490754
GO:0045333	cellular respiration	Biological process	6	0.0239389	2.31799	8	555	396	63681	0.092162
GO:0015980	energy derivation by oxidation of organic compounds	Biological process	5	0.0340485	2.16216	8	595	396	63681	0.123601
GO:1902593	single-organism nuclear import	Biological process	9	0.0387997	2.10554	8	611	396	63681	0.136788
GO:0006606	protein import into nucleus	Biological process	10	0.0387997	2.10554	8	611	396	63681	0.136788
GO:0051170	nuclear import	Biological process	8	0.041984	2.07163	8	621	396	63681	0.145435
GO:0034504	protein localization to nucleus	Biological process	7	0.0423117	2.0683	8	622	396	63681	0.145934
GO:0015103	inorganic anion transmembrane transporter activity	Molecular function	7	0.0086556	3.05949	7	382	355	59271	0.0454186
GO:0050821	protein stabilization	Biological process	5	1.58761e-09	33.1081	7	34	396	63681	4.58962e-08
GO:0031647	regulation of protein stability	Biological process	4	2.43731e-09	31.2687	7	36	396	63681	6.56835e-08
GO:0019755	one-carbon compound transport	Biological process	6	2.70607e-08	22.5135	7	50	396	63681	5.58785e-07
GO:0090700	maintenance of plant organ identity	Biological process	7	6.72715e-07	14.249	7	79	396	63681	9.72379e-06
GO:0048497	maintenance of floral organ identity	Biological process	8	6.72715e-07	14.249	7	79	396	63681	9.72379e-06
GO:0010411	xyloglucan metabolic process	Biological process	9	7.33302e-07	14.0709	7	80	396	63681	1.04103e-05
GO:0045596	negative regulation of cell differentiation	Biological process	6	2.70862e-06	11.6049	7	97	396	63681	3.28757e-05
GO:0052541	plant-type cell wall cellulose metabolic process	Biological process	10	9.55054e-05	6.70044	7	168	396	63681	0.000766938
GO:0009225	nucleotide-sugar metabolic process	Biological process	6	0.000141575	6.28868	7	179	396	63681	0.00105683
GO:0009809	lignin biosynthetic process	Biological process	7	0.00276369	3.79015	7	297	396	63681	0.0149465
GO:0042398	cellular modified amino acid biosynthetic process	Biological process	6	0.0053928	3.35022	7	336	396	63681	0.0264647
GO:0010043	response to zinc ion	Biological process	6	0.0222698	2.52961	7	445	396	63681	0.087
GO:0000272	polysaccharide catabolic process	Biological process	6	0.0244856	2.47946	7	454	396	63681	0.094039
GO:0016620	oxidoreductase activity, acting on the aldehyde or oxo group of donors, NAD or NADP as acceptor	Molecular function	5	0.00212918	4.59524	6	218	355	59271	0.0167587
GO:0042887	amide transmembrane transporter activity	Molecular function	5	0.00679889	3.61647	6	277	355	59271	0.0381363
GO:0004190	aspartic-type endopeptidase activity	Molecular function	7	0.0086916	3.4307	6	292	355	59271	0.0451224
GO:0070001	aspartic-type peptidase activity	Molecular function	6	0.0086916	3.4307	6	292	355	59271	0.0451224
GO:0016903	oxidoreductase activity, acting on the aldehyde or oxo group of donors	Molecular function	4	0.0119376	3.20052	6	313	355	59271	0.0571131
GO:0016592	mediator complex	Cellular component	7	0.000243565	6.98258	6	151	412	72400	0.00113156
GO:0000139	Golgi membrane	Cellular component	6	0.00101499	5.3251	6	198	412	72400	0.00404182
GO:0071277	cellular response to calcium ion	Biological process	7	4.2302e-10	60.304	6	16	396	63681	1.40125e-08
GO:0010017	red or far-red light signaling pathway	Biological process	8	0.00274803	4.3659	6	221	396	63681	0.0149636
GO:0006598	polyamine catabolic process	Biological process	9	0.00274803	4.3659	6	221	396	63681	0.0149636
GO:0071489	cellular response to red or far red light	Biological process	7	0.00356107	4.14105	6	233	396	63681	0.0186868
GO:0006595	polyamine metabolic process	Biological process	8	0.010666	3.28185	6	294	396	63681	0.0463361
GO:0009805	coumarin biosynthetic process	Biological process	7	0.0129714	3.14288	6	307	396	63681	0.0551458
GO:0009804	coumarin metabolic process	Biological process	6	0.0143474	3.07281	6	314	396	63681	0.0605104
GO:0015748	organophosphate ester transport	Biological process	6	0.0389465	2.43039	6	397	396	63681	0.1367
GO:0071478	cellular response to radiation	Biological process	5	0.0487692	2.29729	6	420	396	63681	0.162905
GO:0071482	cellular response to light stimulus	Biological process	6	0.0487692	2.29729	6	420	396	63681	0.162905
GO:0008519	ammonium transmembrane transporter activity	Molecular function	7	8.39574e-06	18.1479	5	46	355	59271	0.000372465
GO:0016762	xyloglucan:xyloglucosyl transferase activity	Molecular function	7	0.000322557	8.5184	5	98	355	59271	0.00437243
GO:0016682	oxidoreductase activity, acting on diphenols and related substances as donors, oxygen as acceptor	Molecular function	5	0.00188343	5.75726	5	145	355	59271	0.0155782
GO:0016679	oxidoreductase activity, acting on diphenols and related substances as donors	Molecular function	4	0.00765996	4.13269	5	202	355	59271	0.0420007
GO:0016866	intramolecular transferase activity	Molecular function	4	0.0116177	3.7268	5	224	355	59271	0.056133
GO:0015035	protein disulfide oxidoreductase activity	Molecular function	6	0.0430057	2.63345	5	317	355	59271	0.156618
GO:0005788	endoplasmic reticulum lumen	Cellular component	6	4.16624e-06	20.92	5	42	412	72400	2.65449e-05
GO:0000322	storage vacuole	Cellular component	7	9.03866e-06	17.9314	5	49	412	72400	5.30426e-05
GO:0000326	protein storage vacuole	Cellular component	8	9.03866e-06	17.9314	5	49	412	72400	5.30426e-05
GO:0030433	ubiquitin-dependent ERAD pathway	Biological process	11	2.17491e-06	23.6486	5	34	396	63681	2.76648e-05
GO:0036503	ERAD pathway	Biological process	7	2.17491e-06	23.6486	5	34	396	63681	2.76648e-05
GO:0072488	ammonium transmembrane transport	Biological process	8	2.91669e-06	22.3348	5	36	396	63681	3.51328e-05
GO:0042026	protein refolding	Biological process	4	1.00773e-05	17.4794	5	46	396	63681	0.00011445
GO:0015695	organic cation transport	Biological process	7	1.52619e-05	16.0811	5	50	396	63681	0.000165077
GO:0042547	cell wall modification involved in multidimensional cell growth	Biological process	7	0.000826523	6.93149	5	116	396	63681	0.0051739
GO:0048598	embryonic morphogenesis	Biological process	4	0.00190393	5.74324	5	140	396	63681	0.0106219
GO:0009292	genetic transfer	Biological process	4	0.00221832	5.54519	5	145	396	63681	0.012247
GO:0009294	DNA mediated transformation	Biological process	5	0.00221832	5.54519	5	145	396	63681	0.012247
GO:0044764	multi-organism cellular process	Biological process	3	0.00242419	5.43279	5	148	396	63681	0.0132912
GO:0006101	citrate metabolic process	Biological process	9	0.00651454	4.29975	5	187	396	63681	0.0308277
GO:0015696	ammonium transport	Biological process	7	0.00910709	3.96085	5	203	396	63681	0.0407895
GO:0072350	tricarboxylic acid metabolic process	Biological process	8	0.00928956	3.94144	5	204	396	63681	0.0414899
GO:0042752	regulation of circadian rhythm	Biological process	4	0.0170823	3.37837	5	238	396	63681	0.0694651
GO:0044070	regulation of anion transport	Biological process	7	0.0260625	3.02276	5	266	396	63681	0.098665
GO:0072507	divalent inorganic cation homeostasis	Biological process	8	0.0469687	2.56886	5	313	396	63681	0.159573
