# Supplementary material for: Overdominance at the Gene Expression Level Plays a Critical Role in the Hybrid Root Growth of Brassica napus
Source: Int J Mol Sci. 2021 Aug 26;22(17):9246. doi: 10.3390/ijms22179246 (PMC8431428; doi:10.3390/ijms22179246)
Supplement: Supplementary file 1 [file ijms-22-09246-s001.zip › ijms-1346590-supplementary/Supplementary Materials/Supplementary file 12.xlsx]

## Sheet: Go terms for Up regulated
GO_ID	GO_Name	Class	GO_Level	P_value	EnrichmentScore	HitsGenesCountsInSelectedSet	HitsGenesCountsInBackground	AllGenesCountsInSelectedSet	AllGenesCountsInBackground	GenesOfSelectedSetInGOterm	corrected p-value(BH method)
GO:0050896	response to stimulus	Biological process	2	0.00576808	1.09837	388	30195	745	63681	BnaA01g34390D,BnaA07g32350D,BnaA07g34770D,BnaC04g48860D,BnaA05g22550D,BnaA02g12280D,BnaA10g17200D,BnaA03g56000D,BnaA03g34430D,BnaAnng01240D,BnaA06g38220D,BnaC04g49710D,BnaC05g34400D,BnaCnng76200D,BnaC07g04450D,BnaC09g18650D,BnaA05g33840D,BnaA02g20830D,BnaA02g09420D,BnaC05g01450D,BnaA02g18950D,BnaA04g14500D,BnaA05g29650D,BnaA08g12420D,BnaA08g24140D,BnaA04g20340D,BnaA04g16900D,BnaA07g33310D,BnaA05g…	0.316235
GO:0044710	single-organism metabolic process	Biological process	3	0.0313277	1.08774	312	24518	745	63681	BnaA09g03380D,BnaA05g22550D,BnaA02g12280D,BnaA10g17200D,BnaAnng01240D,BnaC04g37460D,BnaA06g38220D,BnaC05g34400D,BnaC05g42860D,BnaC07g04450D,BnaA10g16330D,BnaCnng47190D,BnaC09g18650D,BnaA05g33840D,BnaC09g48880D,BnaA02g20830D,BnaA02g09420D,BnaC05g01450D,BnaA02g18950D,BnaA04g14500D,BnaA05g29650D,BnaA08g12420D,BnaA04g20340D,BnaA04g16900D,BnaA07g33310D,BnaA03g00460D,BnaC06g26890D,BnaCnng13420D,BnaA03g…	0.577324
GO:0006950	response to stress	Biological process	3	0.00150262	1.16856	263	19238	745	63681	BnaA07g32350D,BnaA07g34770D,BnaC04g48860D,BnaA05g22550D,BnaA02g12280D,BnaA03g56000D,BnaAnng01240D,BnaA06g38220D,BnaC05g34400D,BnaCnng76200D,BnaC09g18650D,BnaA05g33840D,BnaA02g20830D,BnaC05g01450D,BnaA02g18950D,BnaA04g14500D,BnaA08g12420D,BnaA08g24140D,BnaA07g33310D,BnaA03g00460D,BnaC06g26890D,BnaC04g51150D,BnaC03g47940D,BnaC02g34550D,BnaC02g46050D,BnaC04g36000D,BnaA05g07880D,BnaA02g36710D,BnaC04g…	0.366138
GO:0042221	response to chemical	Biological process	3	0.0201307	1.1194	244	18632	745	63681	BnaA07g32350D,BnaC04g48860D,BnaA05g22550D,BnaA03g56000D,BnaA03g34430D,BnaAnng01240D,BnaA06g38220D,BnaC05g34400D,BnaC07g04450D,BnaA05g33840D,BnaA02g20830D,BnaA02g09420D,BnaC05g01450D,BnaA02g18950D,BnaA04g14500D,BnaA05g29650D,BnaA08g12420D,BnaA08g24140D,BnaA07g33310D,BnaA05g09840D,BnaC06g26890D,BnaC04g51150D,BnaC03g47940D,BnaA05g36360D,BnaC04g47620D,BnaC03g06750D,BnaAnng02130D,BnaC02g36990D,BnaA07g…	0.538373
GO:1901700	response to oxygen-containing compound	Biological process	4	0.00413759	1.20421	173	12280	745	63681	BnaA07g32350D,BnaC04g48860D,BnaA05g22550D,BnaA03g34430D,BnaAnng01240D,BnaA06g38220D,BnaC05g34400D,BnaC07g04450D,BnaA05g33840D,BnaA02g20830D,BnaA02g09420D,BnaC05g01450D,BnaA02g18950D,BnaA04g14500D,BnaA05g29650D,BnaA08g12420D,BnaA05g09840D,BnaC06g26890D,BnaC03g47940D,BnaC04g47620D,BnaC03g06750D,BnaC02g36990D,BnaA07g37160D,BnaA05g33290D,BnaA05g34120D,BnaAnng12710D,BnaA09g00710D,BnaCnng05590D,BnaC04g…	0.252048
GO:0009605	response to external stimulus	Biological process	3	0.0458919	1.14215	143	10702	745	63681	BnaA05g22550D,BnaA10g17200D,BnaAnng01240D,BnaA06g38220D,BnaC05g34400D,BnaC07g04450D,BnaA05g33840D,BnaA02g20830D,BnaA02g09420D,BnaC05g01450D,BnaA02g18950D,BnaA04g14500D,BnaA08g12420D,BnaA08g24140D,BnaA03g00460D,BnaC06g26890D,BnaC04g51150D,BnaC02g34550D,BnaC04g36000D,BnaA03g00350D,BnaA05g07880D,BnaC04g47620D,BnaC03g06750D,BnaAnng02130D,BnaC02g36990D,BnaA07g37160D,BnaA05g33290D,BnaA04g23260D,BnaC02g…	0.703782
GO:0006952	defense response	Biological process	4	0.0196145	1.20753	113	7999	745	63681	BnaA07g34770D,BnaA05g22550D,BnaAnng01240D,BnaA06g38220D,BnaC05g34400D,BnaC05g01450D,BnaA02g18950D,BnaA04g14500D,BnaA08g12420D,BnaA08g24140D,BnaC06g26890D,BnaC04g36000D,BnaA05g07880D,BnaC04g47620D,BnaC03g06750D,BnaAnng02130D,BnaC02g36990D,BnaA07g37160D,BnaA05g33290D,BnaC02g38400D,BnaC01g16980D,BnaA02g35030D,BnaC05g00270D,BnaA02g09460D,BnaA08g10570D,BnaA01g17540D,BnaA03g26100D,BnaAnng19540D,BnaCnng…	0.537682
GO:0043207	response to external biotic stimulus	Biological process	4	0.0400143	1.18277	104	7516	745	63681	BnaA05g22550D,BnaA10g17200D,BnaA06g38220D,BnaC05g34400D,BnaA02g20830D,BnaA02g09420D,BnaC05g01450D,BnaA02g18950D,BnaA04g14500D,BnaA08g12420D,BnaA08g24140D,BnaC06g26890D,BnaC04g51150D,BnaC04g36000D,BnaA03g00350D,BnaA05g07880D,BnaC04g47620D,BnaC03g06750D,BnaAnng02130D,BnaC02g36990D,BnaA07g37160D,BnaA05g33290D,BnaA04g23260D,BnaC02g38400D,BnaA07g32990D,BnaC01g16980D,BnaA02g35030D,BnaA02g09460D,BnaA08g…	0.654861
GO:0051707	response to other organism	Biological process	5	0.0400143	1.18277	104	7516	745	63681	BnaA05g22550D,BnaA10g17200D,BnaA06g38220D,BnaC05g34400D,BnaA02g20830D,BnaA02g09420D,BnaC05g01450D,BnaA02g18950D,BnaA04g14500D,BnaA08g12420D,BnaA08g24140D,BnaC06g26890D,BnaC04g51150D,BnaC04g36000D,BnaA03g00350D,BnaA05g07880D,BnaC04g47620D,BnaC03g06750D,BnaAnng02130D,BnaC02g36990D,BnaA07g37160D,BnaA05g33290D,BnaA04g23260D,BnaC02g38400D,BnaA07g32990D,BnaC01g16980D,BnaA02g35030D,BnaA02g09460D,BnaA08g…	0.654861
GO:0055114	oxidation-reduction process	Biological process	4	0.00756517	1.27716	97	6492	745	63681	BnaA02g12280D,BnaC04g37460D,BnaC05g42860D,BnaC07g04450D,BnaC09g18650D,BnaA04g20340D,BnaA04g16900D,BnaA07g33310D,BnaC03g06750D,BnaA01g32650D,BnaAnng34630D,BnaA03g17670D,BnaA03g56660D,BnaC02g38400D,BnaC04g48440D,BnaC03g57110D,BnaC05g00270D,BnaC09g06820D,BnaC04g45440D,BnaC04g46770D,BnaC01g17610D,BnaC04g56600D,BnaC09g48860D,BnaC05g42730D,BnaC04g50450D,BnaA09g46260D,BnaC01g19130D,BnaCnng72120D,BnaC09g…	0.385824
GO:0016491	oxidoreductase activity	Molecular function	3	0.00579214	1.30318	90	6002	682	59271	BnaA02g12280D,BnaA08g19560D,BnaC04g37460D,BnaC05g42860D,BnaC07g04450D,BnaC09g18650D,BnaA04g20340D,BnaA04g16900D,BnaA07g33310D,BnaC03g06750D,BnaA01g32650D,BnaAnng34630D,BnaA03g17670D,BnaA03g56660D,BnaC04g48440D,BnaC05g00270D,BnaC04g45440D,BnaC01g17610D,BnaC04g56600D,BnaC09g48860D,BnaC05g42730D,BnaA07g11910D,BnaC04g47910D,BnaA09g46260D,BnaC01g19130D,BnaA09g34520D,BnaCnng72120D,BnaC09g39740D,BnaA03g…	0.673543
GO:0002376	immune system process	Biological process	2	0.0158828	1.28001	77	5142	745	63681	BnaA05g22550D,BnaC05g34400D,BnaA02g18950D,BnaA04g14500D,BnaA08g12420D,BnaA08g24140D,BnaC06g26890D,BnaC04g36000D,BnaA05g07880D,BnaC04g47620D,BnaC03g06750D,BnaAnng02130D,BnaA05g33290D,BnaC02g38400D,BnaC01g16980D,BnaA08g10570D,BnaA01g17540D,BnaAnng19540D,BnaCnng03960D,BnaA03g35850D,BnaA06g31080D,BnaC04g46710D,BnaC04g50450D,BnaC09g52570D,BnaC06g38430D,BnaA02g09270D,BnaA03g34270D,BnaA09g49330D,BnaA02g…	0.458303
GO:0006970	response to osmotic stress	Biological process	4	0.00470643	1.35679	75	4725	745	63681	BnaC04g48860D,BnaA03g56000D,BnaAnng01240D,BnaA06g38220D,BnaA05g33840D,BnaA07g33310D,BnaCnng05590D,BnaA03g48400D,BnaA10g21300D,BnaA03g08050D,BnaA01g17540D,BnaA02g28600D,BnaC04g56600D,BnaA06g31080D,BnaC07g29570D,BnaC07g47930D,BnaA02g09590D,BnaA09g46260D,BnaC09g52570D,BnaA02g09270D,BnaA02g21660D,BnaA04g05810D,BnaA01g33120D,BnaC06g14590D,BnaC09g39740D,BnaA01g02450D,BnaC02g36940D,BnaAnng01920D,BnaA01g…	0.278952
GO:0009651	response to salt stress	Biological process	5	0.00905725	1.33381	70	4486	745	63681	BnaC04g48860D,BnaA03g56000D,BnaAnng01240D,BnaA06g38220D,BnaA05g33840D,BnaA07g33310D,BnaCnng05590D,BnaA03g48400D,BnaA10g21300D,BnaA03g08050D,BnaA01g17540D,BnaC04g56600D,BnaA06g31080D,BnaC07g29570D,BnaC07g47930D,BnaA02g09590D,BnaA09g46260D,BnaC09g52570D,BnaA02g09270D,BnaA02g21660D,BnaA04g05810D,BnaA01g33120D,BnaC06g14590D,BnaC09g39740D,BnaA01g02450D,BnaC02g36940D,BnaAnng01920D,BnaA01g19210D,BnaA08g…	0.397251
GO:0008610	lipid biosynthetic process	Biological process	5	0.0311127	1.26062	67	4543	745	63681	BnaA10g17200D,BnaAnng01240D,BnaC05g42860D,BnaC09g18650D,BnaA05g29650D,BnaA04g20340D,BnaA03g00460D,BnaA05g36360D,BnaC07g39050D,BnaA05g34120D,BnaC04g48440D,BnaA09g00710D,BnaC03g57110D,BnaA07g24530D,BnaAnng31100D,BnaC01g16980D,BnaC05g14830D,BnaC04g45440D,BnaC04g46200D,BnaA01g27810D,BnaC01g17610D,BnaA07g35160D,BnaC04g47910D,BnaC04g50450D,BnaA09g46260D,BnaCnng51500D,BnaCnng72120D,BnaA08g03400D,BnaAnng…	0.578222
GO:1901698	response to nitrogen compound	Biological process	4	0.0157512	1.31046	66	4305	745	63681	BnaC04g48860D,BnaA05g22550D,BnaA06g38220D,BnaC05g34400D,BnaC07g04450D,BnaA05g33840D,BnaA04g14500D,BnaA08g12420D,BnaA08g24140D,BnaA05g33290D,BnaCnng05590D,BnaC04g51480D,BnaC06g22860D,BnaA04g02380D,BnaC04g51000D,BnaA09g25130D,BnaC01g15980D,BnaA09g02800D,BnaA07g31530D,BnaA05g13830D,BnaA02g09590D,BnaC04g50450D,BnaC06g38430D,BnaA03g34270D,BnaA09g49330D,BnaC03g24360D,BnaC04g45160D,BnaA06g00510D,BnaA07g…	0.473182
GO:0006790	sulfur compound metabolic process	Biological process	4	0.0255496	1.31579	54	3508	745	63681	BnaA10g17200D,BnaA06g38220D,BnaA02g20830D,BnaAnng28080D,BnaA05g29650D,BnaA03g00460D,BnaC02g38400D,BnaA05g34120D,BnaA02g09460D,BnaC02g26810D,BnaA06g21560D,BnaC05g42730D,BnaC04g47910D,BnaA01g32120D,BnaA09g46260D,BnaCnng51500D,BnaA01g33120D,BnaC06g14590D,BnaA10g26820D,BnaA08g06670D,BnaAnng14580D,BnaAnng38530D,BnaA08g05070D,BnaC05g09680D,BnaA07g05460D,BnaA05g32420D,BnaCnng66020D,BnaC04g50950D,BnaA05g…	0.560303
GO:0072330	monocarboxylic acid biosynthetic process	Biological process	9	0.0147691	1.37346	51	3174	745	63681	BnaA05g22550D,BnaC09g18650D,BnaA02g20830D,BnaA04g20340D,BnaA03g00460D,BnaC06g26890D,BnaC02g38400D,BnaC05g38600D,BnaA03g48400D,BnaC01g16980D,BnaA08g10570D,BnaC04g45440D,BnaAnng19540D,BnaC02g26810D,BnaA04g02380D,BnaC01g17610D,BnaA06g31080D,BnaC04g47910D,BnaC09g52570D,BnaC06g38430D,BnaA02g09270D,BnaA03g34270D,BnaA01g02450D,BnaAnng14580D,BnaC09g23960D,BnaCnng66020D,BnaC04g50950D,BnaA02g06120D,BnaCnng…	0.483412
GO:0006979	response to oxidative stress	Biological process	4	0.00384637	1.50806	47	2664	745	63681	BnaC05g01450D,BnaC03g47940D,BnaA05g33290D,BnaA05g34120D,BnaAnng12710D,BnaA03g48400D,BnaA01g27810D,BnaC05g18020D,BnaA06g31080D,BnaC01g15740D,BnaA09g30390D,BnaA09g46260D,BnaA03g36010D,BnaA10g08500D,BnaA02g09270D,BnaA03g46550D,BnaC09g39740D,BnaA01g02450D,BnaA03g02050D,BnaAnng01920D,BnaC07g46560D,BnaC02g36700D,BnaA03g31090D,BnaA01g33430D,BnaC09g23960D,BnaA05g32420D,BnaA01g12660D,BnaA03g19860D,BnaAnng…	0.248091
GO:0042592	homeostatic process	Biological process	4	0.0108378	1.45465	42	2468	745	63681	BnaA10g17200D,BnaC02g34550D,BnaA01g32650D,BnaA03g17670D,BnaAnng30640D,BnaA06g17430D,BnaA01g27810D,BnaA06g21560D,BnaC01g15980D,BnaC03g71240D,BnaC01g03260D,BnaC03g12410D,BnaA01g19210D,BnaC01g23100D,BnaA03g59850D,BnaC04g19270D,BnaA05g16720D,BnaC03g75450D,BnaCnng54090D,BnaC02g38080D,BnaA09g35560D,BnaA03g23220D,BnaA06g25070D,BnaC05g46790D,BnaA07g04200D,BnaAnng41260D,BnaC08g10640D,BnaA09g48890D,BnaC09g…	0.440136
GO:0042742	defense response to bacterium	Biological process	7	0.02388	1.38521	41	2530	745	63681	BnaA05g22550D,BnaA06g38220D,BnaA04g14500D,BnaA08g12420D,BnaC06g26890D,BnaC04g47620D,BnaC02g36990D,BnaA02g35030D,BnaA02g09460D,BnaA03g35850D,BnaC04g46710D,BnaA09g46260D,BnaC06g38430D,BnaA02g09270D,BnaA03g34270D,BnaA02g21660D,BnaA10g23990D,BnaC03g41690D,BnaA07g22860D,BnaC09g23960D,BnaCnng66020D,BnaA01g12660D,BnaA05g06890D,BnaA09g17180D,BnaA03g25330D,BnaC04g50950D,BnaA05g18150D,BnaA05g29310D,BnaA01g…	0.557115
GO:0010243	response to organonitrogen compound	Biological process	5	0.0331711	1.35787	40	2518	745	63681	BnaC04g48860D,BnaA05g22550D,BnaC05g34400D,BnaA04g14500D,BnaA08g12420D,BnaA05g33290D,BnaC06g22860D,BnaA04g02380D,BnaC01g15980D,BnaA09g02800D,BnaA07g31530D,BnaA02g09590D,BnaC06g38430D,BnaA03g34270D,BnaA09g49330D,BnaC03g24360D,BnaC04g45160D,BnaA06g00510D,BnaA07g22860D,BnaC04g50850D,BnaA09g00120D,BnaC09g23960D,BnaCnng66020D,BnaC01g24670D,BnaA01g12660D,BnaA05g29310D,BnaC03g51130D,BnaA07g02590D,BnaC09g…	0.606201
GO:0010200	response to chitin	Biological process	6	0.02091	1.41196	39	2361	745	63681	BnaC04g48860D,BnaA05g22550D,BnaC05g34400D,BnaA04g14500D,BnaA08g12420D,BnaA05g33290D,BnaC06g22860D,BnaA04g02380D,BnaC01g15980D,BnaA09g02800D,BnaA07g31530D,BnaA02g09590D,BnaC06g38430D,BnaA03g34270D,BnaA09g49330D,BnaC03g24360D,BnaC04g45160D,BnaA06g00510D,BnaA07g22860D,BnaC04g50850D,BnaA09g00120D,BnaC09g23960D,BnaCnng66020D,BnaC01g24670D,BnaA01g12660D,BnaA05g29310D,BnaC03g51130D,BnaA07g02590D,BnaC09g…	0.545899
GO:0044272	sulfur compound biosynthetic process	Biological process	5	0.0310845	1.37074	39	2432	745	63681	BnaA10g17200D,BnaA06g38220D,BnaA02g20830D,BnaA03g00460D,BnaA02g09460D,BnaC02g26810D,BnaC05g42730D,BnaC04g47910D,BnaA01g32120D,BnaA09g46260D,BnaA01g33120D,BnaC06g14590D,BnaA10g26820D,BnaA08g06670D,BnaAnng38530D,BnaA08g05070D,BnaC05g09680D,BnaA07g05460D,BnaA05g32420D,BnaCnng66020D,BnaC04g50950D,BnaA05g18150D,BnaC03g42170D,BnaC06g37820D,BnaA03g57300D,BnaA05g37220D,BnaA07g10330D,BnaCnng63770D,BnaA09g…	0.582634
GO:0006073	cellular glucan metabolic process	Biological process	7	0.00335463	1.60403	38	2025	745	63681	BnaA09g03380D,BnaA10g17200D,BnaAnng01240D,BnaA06g38220D,BnaC09g48880D,BnaA05g29650D,BnaC07g39050D,BnaA05g34120D,BnaAnng12710D,BnaA09g00710D,BnaC05g04430D,BnaA02g09460D,BnaC08g26090D,BnaC05g18020D,BnaA03g46000D,BnaC06g17090D,BnaC04g47910D,BnaA09g30390D,BnaCnng51500D,BnaA08g05070D,BnaC09g21500D,BnaC05g09680D,BnaA02g21750D,BnaA05g32420D,BnaA09g46300D,BnaC03g58050D,BnaA03g36910D,BnaA03g40550D,BnaC04g…	0.272471
GO:0044042	glucan metabolic process	Biological process	6	0.00335463	1.60403	38	2025	745	63681	BnaA09g03380D,BnaA10g17200D,BnaAnng01240D,BnaA06g38220D,BnaC09g48880D,BnaA05g29650D,BnaC07g39050D,BnaA05g34120D,BnaAnng12710D,BnaA09g00710D,BnaC05g04430D,BnaA02g09460D,BnaC08g26090D,BnaC05g18020D,BnaA03g46000D,BnaC06g17090D,BnaC04g47910D,BnaA09g30390D,BnaCnng51500D,BnaA08g05070D,BnaC09g21500D,BnaC05g09680D,BnaA02g21750D,BnaA05g32420D,BnaA09g46300D,BnaC03g58050D,BnaA03g36910D,BnaA03g40550D,BnaC04g…	0.272471
GO:0009414	response to water deprivation	Biological process	6	0.026988	1.39227	38	2333	745	63681	BnaA07g32350D,BnaC04g48860D,BnaA06g38220D,BnaA02g20830D,BnaC05g01450D,BnaA09g00710D,BnaC02g26810D,BnaA06g31080D,BnaA02g09590D,BnaC09g52570D,BnaA02g09270D,BnaC06g14590D,BnaA01g02450D,BnaC03g55650D,BnaC04g50300D,BnaC02g36700D,BnaC04g50850D,BnaC05g09680D,BnaCnng66020D,BnaA08g04430D,BnaA09g17180D,BnaC09g35160D,BnaA02g08010D,BnaA03g40550D,BnaC04g50270D,BnaA09g20510D,BnaA09g18200D,BnaA03g11140D,BnaA05g…	0.580243
GO:0009415	response to water	Biological process	5	0.0308162	1.37809	38	2357	745	63681	BnaA07g32350D,BnaC04g48860D,BnaA06g38220D,BnaA02g20830D,BnaC05g01450D,BnaA09g00710D,BnaC02g26810D,BnaA06g31080D,BnaA02g09590D,BnaC09g52570D,BnaA02g09270D,BnaC06g14590D,BnaA01g02450D,BnaC03g55650D,BnaC04g50300D,BnaC02g36700D,BnaC04g50850D,BnaC05g09680D,BnaCnng66020D,BnaA08g04430D,BnaA09g17180D,BnaC09g35160D,BnaA02g08010D,BnaA03g40550D,BnaC04g50270D,BnaA09g20510D,BnaA09g18200D,BnaA03g11140D,BnaA05g…	0.582586
GO:0009743	response to carbohydrate	Biological process	5	0.0243629	1.42599	35	2098	745	63681	BnaAnng01240D,BnaA06g38220D,BnaA02g09420D,BnaA05g29650D,BnaA09g00710D,BnaC01g16980D,BnaC05g00270D,BnaA03g08050D,BnaA05g06680D,BnaAnng19540D,BnaA06g31080D,BnaA09g46260D,BnaCnng51500D,BnaCnng00490D,BnaC06g14590D,BnaC03g55140D,BnaAnng38530D,BnaAnng01920D,BnaA01g19210D,BnaC01g23100D,BnaC01g24540D,BnaC09g29660D,BnaA05g32420D,BnaA09g17180D,BnaA05g18150D,BnaA05g16720D,BnaA03g33640D,BnaA05g11140D,BnaC04g…	0.562398
GO:0044550	secondary metabolite biosynthetic process	Biological process	5	0.0041293	1.66077	32	1647	745	63681	BnaA02g12280D,BnaA10g17200D,BnaAnng01240D,BnaA06g38220D,BnaA02g20830D,BnaA04g20340D,BnaA03g00460D,BnaC02g26810D,BnaC05g42730D,BnaC04g47910D,BnaA01g32120D,BnaA09g46260D,BnaA01g33120D,BnaA10g26820D,BnaAnng38530D,BnaA08g05070D,BnaC05g09680D,BnaA07g05460D,BnaA05g32420D,BnaCnng66020D,BnaC04g50950D,BnaC05g42780D,BnaC06g37820D,BnaAnng16790D,BnaA01g06150D,BnaC02g37210D,BnaCnng33260D,BnaA02g18320D,BnaC04g…	0.25873
GO:0048878	chemical homeostasis	Biological process	5	0.00597048	1.63266	31	1623	745	63681	BnaA10g17200D,BnaC02g34550D,BnaAnng30640D,BnaA06g17430D,BnaA01g27810D,BnaC01g15980D,BnaC03g71240D,BnaC01g03260D,BnaA01g19210D,BnaC01g23100D,BnaA03g59850D,BnaA05g16720D,BnaC03g75450D,BnaCnng54090D,BnaC02g38080D,BnaA09g35560D,BnaA03g23220D,BnaA06g25070D,BnaC05g46790D,BnaAnng41260D,BnaC08g10640D,BnaA09g48890D,BnaC09g10980D,BnaA07g23780D,BnaA05g11140D,BnaA03g54880D,BnaCnng33000D,BnaA01g02110D,BnaC03g…	0.319348
GO:0009250	glucan biosynthetic process	Biological process	9	0.00291162	1.75432	29	1413	745	63681	BnaA09g03380D,BnaA10g17200D,BnaAnng01240D,BnaA06g38220D,BnaC09g48880D,BnaA05g29650D,BnaC07g39050D,BnaAnng12710D,BnaC05g04430D,BnaA02g09460D,BnaC08g26090D,BnaA03g46000D,BnaC06g17090D,BnaC04g47910D,BnaCnng51500D,BnaA08g05070D,BnaC09g21500D,BnaA05g32420D,BnaA09g46300D,BnaC03g58050D,BnaA03g40550D,BnaC04g50160D,BnaC03g12600D,BnaC06g32300D,BnaC01g04690D,BnaA01g33130D,BnaA03g49940D,BnaA03g55140D,BnaA05g…	0.290235
GO:0000302	response to reactive oxygen species	Biological process	5	0.0154149	1.5435	29	1606	745	63681	BnaC05g01450D,BnaC03g47940D,BnaA05g33290D,BnaA05g34120D,BnaAnng12710D,BnaA01g27810D,BnaC05g18020D,BnaA06g31080D,BnaA09g30390D,BnaA09g46260D,BnaA03g36010D,BnaA10g08500D,BnaA02g09270D,BnaA03g46550D,BnaC09g39740D,BnaAnng01920D,BnaC02g36700D,BnaA01g33430D,BnaA03g19860D,BnaAnng27860D,BnaA09g35560D,BnaC06g26900D,BnaC09g10980D,BnaA07g23780D,BnaC07g39340D,BnaC06g38200D,BnaCnng33000D,BnaC04g19630D,BnaC03g…	0.476124
GO:0050801	ion homeostasis	Biological process	6	0.00336252	1.75596	28	1363	745	63681	BnaA10g17200D,BnaC02g34550D,BnaAnng30640D,BnaA06g17430D,BnaA01g27810D,BnaC01g15980D,BnaC01g03260D,BnaA01g19210D,BnaC01g23100D,BnaA03g59850D,BnaA05g16720D,BnaC03g75450D,BnaCnng54090D,BnaA09g35560D,BnaA03g23220D,BnaA06g25070D,BnaC05g46790D,BnaAnng41260D,BnaC08g10640D,BnaA09g48890D,BnaC09g10980D,BnaA07g23780D,BnaA03g54880D,BnaCnng33000D,BnaA01g02110D,BnaC03g78210D,BnaCnng08290D,BnaC05g29370D,	0.254276
GO:1901657	glycosyl compound metabolic process	Biological process	5	0.00837642	1.65441	27	1395	745	63681	BnaA10g17200D,BnaA06g38220D,BnaA02g20830D,BnaA03g00460D,BnaC02g38400D,BnaC02g26810D,BnaC05g42730D,BnaC01g15740D,BnaC04g47910D,BnaA01g32120D,BnaA09g46260D,BnaA01g33120D,BnaA10g26820D,BnaAnng14580D,BnaAnng38530D,BnaA08g05070D,BnaC05g09680D,BnaA07g05460D,BnaA05g32420D,BnaC04g50950D,BnaC06g37820D,BnaAnng16790D,BnaA01g06150D,BnaC02g37210D,BnaCnng33260D,BnaC04g48480D,BnaA03g55140D,	0.399336
GO:0019725	cellular homeostasis	Biological process	5	0.0368607	1.4506	27	1591	745	63681	BnaA10g17200D,BnaA01g32650D,BnaA03g17670D,BnaA01g27810D,BnaC01g03260D,BnaC03g12410D,BnaA01g19210D,BnaC01g23100D,BnaA03g59850D,BnaC04g19270D,BnaA05g16720D,BnaA09g35560D,BnaA03g23220D,BnaA07g04200D,BnaAnng41260D,BnaC08g10640D,BnaC09g10980D,BnaA03g54880D,BnaC06g38200D,BnaA10g16700D,BnaA01g02110D,BnaC04g50440D,BnaC03g78210D,BnaC04g56890D,BnaCnng08290D,BnaC05g29370D,BnaA09g03750D,	0.631528
GO:0042440	pigment metabolic process	Biological process	4	0.0404409	1.44878	26	1534	745	63681	BnaC05g42860D,BnaA05g33840D,BnaA02g18950D,BnaA03g00460D,BnaCnng13420D,BnaC05g38600D,BnaCnng05590D,BnaC01g17610D,BnaCnng72120D,BnaA06g36850D,BnaC06g27630D,BnaA05g32420D,BnaAnng23280D,BnaC03g42170D,BnaCnng51770D,BnaA09g48890D,BnaA07g23780D,BnaC06g22740D,BnaCnng33260D,BnaC04g48480D,BnaA09g20510D,BnaA09g18200D,BnaC08g32450D,BnaA09g36380D,BnaA05g27180D,BnaA05g29710D,	0.65211
GO:0019757	glycosinolate metabolic process	Biological process	7	0.00173068	1.91999	25	1113	745	63681	BnaA10g17200D,BnaA06g38220D,BnaA02g20830D,BnaA03g00460D,BnaC02g38400D,BnaC02g26810D,BnaC05g42730D,BnaC04g47910D,BnaA01g32120D,BnaA09g46260D,BnaA01g33120D,BnaA10g26820D,BnaAnng14580D,BnaA08g05070D,BnaC05g09680D,BnaA07g05460D,BnaA05g32420D,BnaC04g50950D,BnaC06g37820D,BnaAnng16790D,BnaA01g06150D,BnaC02g37210D,BnaCnng33260D,BnaC04g48480D,BnaA03g55140D,	0.345035
GO:0019760	glucosinolate metabolic process	Biological process	8	0.00173068	1.91999	25	1113	745	63681	BnaA10g17200D,BnaA06g38220D,BnaA02g20830D,BnaA03g00460D,BnaC02g38400D,BnaC02g26810D,BnaC05g42730D,BnaC04g47910D,BnaA01g32120D,BnaA09g46260D,BnaA01g33120D,BnaA10g26820D,BnaAnng14580D,BnaA08g05070D,BnaC05g09680D,BnaA07g05460D,BnaA05g32420D,BnaC04g50950D,BnaC06g37820D,BnaAnng16790D,BnaA01g06150D,BnaC02g37210D,BnaCnng33260D,BnaC04g48480D,BnaA03g55140D,	0.345035
GO:0016143	S-glycoside metabolic process	Biological process	6	0.00173068	1.91999	25	1113	745	63681	BnaA10g17200D,BnaA06g38220D,BnaA02g20830D,BnaA03g00460D,BnaC02g38400D,BnaC02g26810D,BnaC05g42730D,BnaC04g47910D,BnaA01g32120D,BnaA09g46260D,BnaA01g33120D,BnaA10g26820D,BnaAnng14580D,BnaA08g05070D,BnaC05g09680D,BnaA07g05460D,BnaA05g32420D,BnaC04g50950D,BnaC06g37820D,BnaAnng16790D,BnaA01g06150D,BnaC02g37210D,BnaCnng33260D,BnaC04g48480D,BnaA03g55140D,	0.345035
GO:0002252	immune effector process	Biological process	3	0.0253432	1.53076	25	1396	745	63681	BnaC05g34400D,BnaA04g14500D,BnaA08g12420D,BnaA08g24140D,BnaA05g07880D,BnaC04g47620D,BnaC04g50450D,BnaA03g34270D,BnaA09g49330D,BnaC03g24360D,BnaC04g45160D,BnaA06g00510D,BnaC04g50850D,BnaA09g00120D,BnaA07g05460D,BnaCnng66020D,BnaC04g18710D,BnaC01g24670D,BnaA05g29310D,BnaA06g34510D,BnaA03g57300D,BnaA02g25590D,BnaA01g34790D,BnaC04g36310D,BnaA03g08110D,	0.567118
GO:1901659	glycosyl compound biosynthetic process	Biological process	6	0.00177689	1.94636	24	1054	745	63681	BnaA10g17200D,BnaA06g38220D,BnaA02g20830D,BnaA03g00460D,BnaC02g26810D,BnaC05g42730D,BnaC01g15740D,BnaC04g47910D,BnaA01g32120D,BnaA09g46260D,BnaA01g33120D,BnaA10g26820D,BnaAnng38530D,BnaA08g05070D,BnaC05g09680D,BnaA07g05460D,BnaA05g32420D,BnaC04g50950D,BnaC06g37820D,BnaAnng16790D,BnaA01g06150D,BnaC02g37210D,BnaCnng33260D,BnaC04g48480D,	0.278337
GO:0009812	flavonoid metabolic process	Biological process	4	0.0135627	1.64117	24	1250	745	63681	BnaA02g18950D,BnaC05g00270D,BnaA05g06680D,BnaAnng38530D,BnaA01g19210D,BnaC01g23100D,BnaA10g30450D,BnaC06g27630D,BnaC05g09680D,BnaC09g29660D,BnaA05g32420D,BnaA05g16720D,BnaC03g56620D,BnaC04g56940D,BnaA09g13660D,BnaA09g48890D,BnaC06g22740D,BnaC09g43250D,BnaA09g20510D,BnaA09g18200D,BnaA01g26300D,BnaC08g32450D,BnaA09g36380D,BnaC05g29370D,	0.472112
GO:0019758	glycosinolate biosynthetic process	Biological process	8	0.00124855	2.07333	22	907	745	63681	BnaA10g17200D,BnaA06g38220D,BnaA02g20830D,BnaA03g00460D,BnaC02g26810D,BnaC05g42730D,BnaC04g47910D,BnaA01g32120D,BnaA09g46260D,BnaA01g33120D,BnaA10g26820D,BnaA08g05070D,BnaC05g09680D,BnaA07g05460D,BnaA05g32420D,BnaC04g50950D,BnaC06g37820D,BnaAnng16790D,BnaA01g06150D,BnaC02g37210D,BnaCnng33260D,BnaC04g48480D,	0.547614
GO:0019761	glucosinolate biosynthetic process	Biological process	9	0.00124855	2.07333	22	907	745	63681	BnaA10g17200D,BnaA06g38220D,BnaA02g20830D,BnaA03g00460D,BnaC02g26810D,BnaC05g42730D,BnaC04g47910D,BnaA01g32120D,BnaA09g46260D,BnaA01g33120D,BnaA10g26820D,BnaA08g05070D,BnaC05g09680D,BnaA07g05460D,BnaA05g32420D,BnaC04g50950D,BnaC06g37820D,BnaAnng16790D,BnaA01g06150D,BnaC02g37210D,BnaCnng33260D,BnaC04g48480D,	0.547614
GO:0016144	S-glycoside biosynthetic process	Biological process	7	0.00124855	2.07333	22	907	745	63681	BnaA10g17200D,BnaA06g38220D,BnaA02g20830D,BnaA03g00460D,BnaC02g26810D,BnaC05g42730D,BnaC04g47910D,BnaA01g32120D,BnaA09g46260D,BnaA01g33120D,BnaA10g26820D,BnaA08g05070D,BnaC05g09680D,BnaA07g05460D,BnaA05g32420D,BnaC04g50950D,BnaC06g37820D,BnaAnng16790D,BnaA01g06150D,BnaC02g37210D,BnaCnng33260D,BnaC04g48480D,	0.547614
GO:0055080	cation homeostasis	Biological process	7	0.0339144	1.53261	22	1227	745	63681	BnaA10g17200D,BnaC02g34550D,BnaAnng30640D,BnaC01g03260D,BnaA01g19210D,BnaC01g23100D,BnaA05g16720D,BnaCnng54090D,BnaA09g35560D,BnaA03g23220D,BnaA06g25070D,BnaC05g46790D,BnaC08g10640D,BnaA09g48890D,BnaC09g10980D,BnaA07g23780D,BnaA03g54880D,BnaCnng33000D,BnaA01g02110D,BnaC03g78210D,BnaCnng08290D,BnaC05g29370D,	0.614664
GO:0051273	beta-glucan metabolic process	Biological process	8	0.00136998	2.09946	21	855	745	63681	BnaA09g03380D,BnaAnng01240D,BnaA06g38220D,BnaC09g48880D,BnaA05g29650D,BnaA05g34120D,BnaAnng12710D,BnaA03g46000D,BnaC06g17090D,BnaCnng51500D,BnaC05g09680D,BnaA02g21750D,BnaA09g46300D,BnaA03g36910D,BnaC04g50160D,BnaAnng41260D,BnaC03g12600D,BnaC06g32300D,BnaA01g33130D,BnaA03g49940D,BnaA05g32300D,	0.375546
GO:0009746	response to hexose	Biological process	7	0.00375052	1.926	21	932	745	63681	BnaAnng01240D,BnaA06g38220D,BnaA02g09420D,BnaA05g29650D,BnaAnng19540D,BnaCnng51500D,BnaCnng00490D,BnaC06g14590D,BnaA01g19210D,BnaC01g23100D,BnaC01g24540D,BnaC09g29660D,BnaA05g18150D,BnaA05g16720D,BnaA03g33640D,BnaC04g48480D,BnaC04g03760D,BnaC08g41460D,BnaC07g41410D,BnaC05g29370D,BnaA03g08110D,	0.249239
GO:0034284	response to monosaccharide	Biological process	6	0.00521281	1.86983	21	960	745	63681	BnaAnng01240D,BnaA06g38220D,BnaA02g09420D,BnaA05g29650D,BnaAnng19540D,BnaCnng51500D,BnaCnng00490D,BnaC06g14590D,BnaA01g19210D,BnaC01g23100D,BnaC01g24540D,BnaC09g29660D,BnaA05g18150D,BnaA05g16720D,BnaA03g33640D,BnaC04g48480D,BnaC04g03760D,BnaC08g41460D,BnaC07g41410D,BnaC05g29370D,BnaA03g08110D,	0.300834
GO:0030243	cellulose metabolic process	Biological process	9	0.00300489	2.04544	19	794	745	63681	BnaA09g03380D,BnaAnng01240D,BnaA06g38220D,BnaC09g48880D,BnaA05g29650D,BnaA05g34120D,BnaAnng12710D,BnaA03g46000D,BnaCnng51500D,BnaC05g09680D,BnaA02g21750D,BnaA09g46300D,BnaA03g36910D,BnaC04g50160D,BnaAnng41260D,BnaC03g12600D,BnaA01g33130D,BnaA03g49940D,BnaA05g32300D,	0.274572
GO:0048511	rhythmic process	Biological process	2	0.00330149	2.02756	19	801	745	63681	BnaA07g32350D,BnaC09g35410D,BnaC04g45200D,BnaC05g18020D,BnaC04g46710D,BnaA09g30390D,BnaA10g19230D,BnaC09g09830D,BnaA03g31420D,BnaA03g11350D,BnaC07g27880D,BnaAnng00500D,BnaC03g51530D,BnaC06g22740D,BnaC04g47430D,BnaC06g41200D,BnaC07g39340D,BnaA03g19150D,BnaA09g36380D,	0.289607
GO:0007623	circadian rhythm	Biological process	3	0.00330149	2.02756	19	801	745	63681	BnaA07g32350D,BnaC09g35410D,BnaC04g45200D,BnaC05g18020D,BnaC04g46710D,BnaA09g30390D,BnaA10g19230D,BnaC09g09830D,BnaA03g31420D,BnaA03g11350D,BnaC07g27880D,BnaAnng00500D,BnaC03g51530D,BnaC06g22740D,BnaC04g47430D,BnaC06g41200D,BnaC07g39340D,BnaA03g19150D,BnaA09g36380D,	0.289607
GO:0009750	response to fructose	Biological process	8	0.00757627	1.90893	18	806	745	63681	BnaAnng01240D,BnaA06g38220D,BnaA05g29650D,BnaAnng19540D,BnaCnng51500D,BnaCnng00490D,BnaC06g14590D,BnaA01g19210D,BnaC01g23100D,BnaC01g24540D,BnaC09g29660D,BnaA05g16720D,BnaA03g33640D,BnaC04g48480D,BnaC04g03760D,BnaC08g41460D,BnaC07g41410D,BnaC05g29370D,	0.377608
GO:0098771	inorganic ion homeostasis	Biological process	7	0.0109679	1.83604	18	838	745	63681	BnaC02g34550D,BnaAnng30640D,BnaA06g17430D,BnaA01g27810D,BnaC01g03260D,BnaC03g75450D,BnaCnng54090D,BnaA09g35560D,BnaA06g25070D,BnaC05g46790D,BnaAnng41260D,BnaC08g10640D,BnaA09g48890D,BnaC09g10980D,BnaA07g23780D,BnaA03g54880D,BnaCnng33000D,BnaA01g02110D,	0.437321
GO:0051274	beta-glucan biosynthetic process	Biological process	10	0.00124554	2.41207	16	567	745	63681	BnaA09g03380D,BnaAnng01240D,BnaA06g38220D,BnaC09g48880D,BnaA05g29650D,BnaAnng12710D,BnaA03g46000D,BnaC06g17090D,BnaCnng51500D,BnaA09g46300D,BnaC04g50160D,BnaC03g12600D,BnaC06g32300D,BnaA01g33130D,BnaA03g49940D,BnaA05g32300D,	0.682867
GO:0045730	respiratory burst	Biological process	4	0.0157916	1.88001	15	682	745	63681	BnaC05g34400D,BnaA04g14500D,BnaA08g12420D,BnaA03g34270D,BnaA09g49330D,BnaC03g24360D,BnaC04g45160D,BnaA06g00510D,BnaC04g50850D,BnaA09g00120D,BnaCnng66020D,BnaC01g24670D,BnaA05g29310D,BnaA01g34790D,BnaC04g36310D,	0.467985
GO:0002679	respiratory burst involved in defense response	Biological process	5	0.0157916	1.88001	15	682	745	63681	BnaC05g34400D,BnaA04g14500D,BnaA08g12420D,BnaA03g34270D,BnaA09g49330D,BnaC03g24360D,BnaC04g45160D,BnaA06g00510D,BnaC04g50850D,BnaA09g00120D,BnaCnng66020D,BnaC01g24670D,BnaA05g29310D,BnaA01g34790D,BnaC04g36310D,	0.467985
GO:0030244	cellulose biosynthetic process	Biological process	11	0.00291166	2.365	14	506	745	63681	BnaA09g03380D,BnaAnng01240D,BnaA06g38220D,BnaC09g48880D,BnaA05g29650D,BnaAnng12710D,BnaA03g46000D,BnaCnng51500D,BnaA09g46300D,BnaC04g50160D,BnaC03g12600D,BnaA01g33130D,BnaA03g49940D,BnaA05g32300D,	0.27762
GO:0015980	energy derivation by oxidation of organic compounds	Biological process	5	0.0114088	2.01124	14	595	745	63681	BnaC03g06750D,BnaC04g48440D,BnaC09g06820D,BnaC05g42730D,BnaA09g46260D,BnaA09g07110D,BnaAnng41760D,BnaAnng04700D,BnaC03g58050D,BnaA03g33640D,BnaA03g03560D,BnaC09g46650D,BnaC04g19630D,BnaCnng12720D,	0.43894
GO:0055065	metal ion homeostasis	Biological process	8	0.0460151	1.66438	14	719	745	63681	BnaC02g34550D,BnaAnng30640D,BnaC01g03260D,BnaCnng54090D,BnaA09g35560D,BnaA06g25070D,BnaC05g46790D,BnaC08g10640D,BnaA09g48890D,BnaC09g10980D,BnaA07g23780D,BnaA03g54880D,BnaCnng33000D,BnaA01g02110D,	0.642746
GO:0009247	glycolipid biosynthetic process	Biological process	8	0.0116501	2.0693	13	537	745	63681	BnaA03g00460D,BnaC04g48440D,BnaA09g00710D,BnaC05g14830D,BnaA01g27810D,BnaC04g50300D,BnaA02g08010D,BnaC04g50270D,BnaA07g04530D,BnaC04g48480D,BnaA08g23000D,BnaC03g10000D,BnaA03g08110D,	0.440495
GO:0045333	cellular respiration	Biological process	6	0.0149165	2.00218	13	555	745	63681	BnaC03g06750D,BnaC04g48440D,BnaC09g06820D,BnaC05g42730D,BnaA09g46260D,BnaA09g07110D,BnaAnng41760D,BnaAnng04700D,BnaA03g33640D,BnaA03g03560D,BnaC09g46650D,BnaC04g19630D,BnaCnng12720D,	0.481057
GO:0052545	callose localization	Biological process	5	0.0213314	1.90602	13	583	745	63681	BnaC07g04450D,BnaA05g33290D,BnaA08g10570D,BnaC01g15980D,BnaC06g17090D,BnaC09g52570D,BnaA02g09270D,BnaA07g22860D,BnaC05g09680D,BnaA07g02590D,BnaC06g32300D,BnaA02g28400D,BnaC08g41460D,	0.550351
GO:0006664	glycolipid metabolic process	Biological process	7	0.0215935	1.90276	13	584	745	63681	BnaA03g00460D,BnaC04g48440D,BnaA09g00710D,BnaC05g14830D,BnaA01g27810D,BnaC04g50300D,BnaA02g08010D,BnaC04g50270D,BnaA07g04530D,BnaC04g48480D,BnaA08g23000D,BnaC03g10000D,BnaA03g08110D,	0.550633
GO:1903509	liposaccharide metabolic process	Biological process	5	0.0252217	1.86133	13	597	745	63681	BnaA03g00460D,BnaC04g48440D,BnaA09g00710D,BnaC05g14830D,BnaA01g27810D,BnaC04g50300D,BnaA02g08010D,BnaC04g50270D,BnaA07g04530D,BnaC04g48480D,BnaA08g23000D,BnaC03g10000D,BnaA03g08110D,	0.57022
GO:0033037	polysaccharide localization	Biological process	4	0.0258175	1.85511	13	599	745	63681	BnaC07g04450D,BnaA05g33290D,BnaA08g10570D,BnaC01g15980D,BnaC06g17090D,BnaC09g52570D,BnaA02g09270D,BnaA07g22860D,BnaC05g09680D,BnaA07g02590D,BnaC06g32300D,BnaA02g28400D,BnaC08g41460D,	0.560573
GO:0031226	intrinsic component of plasma membrane	Cellular component	4	0.0337163	1.83518	12	555	853	72400	BnaA03g11640D,BnaA05g34120D,BnaAnng19540D,BnaC01g24930D,BnaA03g35850D,BnaC03g41690D,BnaA03g28040D,BnaA09g17180D,BnaA06g22110D,BnaAnng17240D,BnaAnng41260D,BnaA08g23000D,	1
GO:0019375	galactolipid biosynthetic process	Biological process	9	0.0124636	2.12367	12	483	745	63681	BnaA03g00460D,BnaC04g48440D,BnaA09g00710D,BnaC05g14830D,BnaA01g27810D,BnaC04g50300D,BnaA02g08010D,BnaC04g50270D,BnaC04g48480D,BnaA08g23000D,BnaC03g10000D,BnaA03g08110D,	0.463264
GO:0019374	galactolipid metabolic process	Biological process	8	0.0144205	2.0806	12	493	745	63681	BnaA03g00460D,BnaC04g48440D,BnaA09g00710D,BnaC05g14830D,BnaA01g27810D,BnaC04g50300D,BnaA02g08010D,BnaC04g50270D,BnaC04g48480D,BnaA08g23000D,BnaC03g10000D,BnaA03g08110D,	0.486525
GO:0036293	response to decreased oxygen levels	Biological process	5	0.0175419	2.02314	12	507	745	63681	BnaA07g33310D,BnaC03g06750D,BnaA09g00710D,BnaCnng03960D,BnaC04g51210D,BnaAnng04700D,BnaA07g03790D,BnaC08g39510D,BnaC09g46650D,BnaC06g37860D,BnaA03g16740D,BnaA03g08110D,	0.493197
GO:0070482	response to oxygen levels	Biological process	4	0.0180262	2.01519	12	509	745	63681	BnaA07g33310D,BnaC03g06750D,BnaA09g00710D,BnaCnng03960D,BnaC04g51210D,BnaAnng04700D,BnaA07g03790D,BnaC08g39510D,BnaC09g46650D,BnaC06g37860D,BnaA03g16740D,BnaA03g08110D,	0.500398
GO:0009624	response to nematode	Biological process	6	0.0198006	1.98786	12	516	745	63681	BnaA05g22550D,BnaA10g17200D,BnaA02g09420D,BnaA03g00350D,BnaA04g23260D,BnaA07g32990D,BnaC04g46200D,BnaCnng18870D,BnaA10g23990D,BnaC03g00250D,BnaC03g33300D,BnaA01g04350D,	0.536082
GO:0046365	monosaccharide catabolic process	Biological process	7	0.0462582	1.74445	12	588	745	63681	BnaA02g09420D,BnaA03g27500D,BnaAnng12710D,BnaC05g42730D,BnaA10g26820D,BnaC04g18710D,BnaA09g46300D,BnaAnng17240D,BnaA03g54880D,BnaCnng33000D,BnaAnng32910D,BnaA03g55140D,	0.642053
GO:0019320	hexose catabolic process	Biological process	8	0.0462582	1.74445	12	588	745	63681	BnaA02g09420D,BnaA03g27500D,BnaAnng12710D,BnaC05g42730D,BnaA10g26820D,BnaC04g18710D,BnaA09g46300D,BnaAnng17240D,BnaA03g54880D,BnaCnng33000D,BnaAnng32910D,BnaA03g55140D,	0.642053
GO:0051240	positive regulation of multicellular organismal process	Biological process	5	0.00269914	2.7333	11	344	745	63681	BnaA05g09840D,BnaC07g39050D,BnaC05g18020D,BnaA06g14090D,BnaA09g30390D,BnaA05g14370D,BnaA06g06870D,BnaC03g33300D,BnaA08g04900D,BnaC04g19630D,BnaA02g09060D,	0.295961
GO:0051094	positive regulation of developmental process	Biological process	5	0.00523435	2.50068	11	376	745	63681	BnaA05g09840D,BnaC07g39050D,BnaC05g18020D,BnaA06g14090D,BnaA09g30390D,BnaA05g14370D,BnaA06g06870D,BnaC03g33300D,BnaA08g04900D,BnaC04g19630D,BnaA02g09060D,	0.294331
GO:0001666	response to hypoxia	Biological process	6	0.0292162	1.93867	11	485	745	63681	BnaA07g33310D,BnaC03g06750D,BnaA09g00710D,BnaCnng03960D,BnaAnng04700D,BnaA07g03790D,BnaC08g39510D,BnaC09g46650D,BnaC06g37860D,BnaA03g16740D,BnaA03g08110D,	0.562028
GO:0048582	positive regulation of post-embryonic development	Biological process	7	0.00371484	2.77525	10	308	745	63681	BnaA05g09840D,BnaC07g39050D,BnaC05g18020D,BnaA06g14090D,BnaA09g30390D,BnaA05g14370D,BnaC03g33300D,BnaA08g04900D,BnaC04g19630D,BnaA02g09060D,	0.254583
GO:0009955	adaxial/abaxial pattern specification	Biological process	6	0.0475864	1.92325	9	400	745	63681	BnaC04g47620D,BnaC07g47930D,BnaCnng58510D,BnaA09g40050D,BnaA05g06890D,BnaCnng72090D,BnaC04g50200D,BnaA05g27180D,BnaC03g25350D,	0.652231
GO:0016903	oxidoreductase activity, acting on the aldehyde or oxo group of donors	Molecular function	4	0.0296449	2.22128	8	313	682	59271	BnaA08g19560D,BnaA09g46260D,BnaAnng14580D,BnaA08g04430D,BnaA10g14600D,BnaA03g28400D,BnaC04g46630D,BnaCnng66820D,	0.635024
GO:0046658	anchored component of plasma membrane	Cellular component	5	0.0367464	2.12857	8	319	853	72400	BnaA05g34120D,BnaC01g24930D,BnaA03g35850D,BnaC03g41690D,BnaA09g17180D,BnaA06g22110D,BnaAnng17240D,BnaAnng41260D,	1
GO:2000243	positive regulation of reproductive process	Biological process	5	0.00620209	2.96027	8	231	745	63681	BnaA05g09840D,BnaC07g39050D,BnaC05g18020D,BnaA06g14090D,BnaA09g30390D,BnaA05g14370D,BnaC03g33300D,BnaA02g09060D,	0.323838
GO:0016831	carboxy-lyase activity	Molecular function	5	0.035407	2.28704	7	266	682	59271	BnaC04g48440D,BnaC05g38600D,BnaCnng03960D,BnaA01g02450D,BnaAnng38530D,BnaC01g24540D,BnaA03g33640D,	0.62655
GO:0009269	response to desiccation	Biological process	7	0.0135569	2.796	7	214	745	63681	BnaA06g38220D,BnaC09g52570D,BnaC06g14590D,BnaA08g04430D,BnaA09g18200D,BnaC09g16700D,BnaC04g46630D,	0.479522
GO:0033015	tetrapyrrole catabolic process	Biological process	6	0.0223379	2.52466	7	237	745	63681	BnaA05g33840D,BnaCnng13420D,BnaCnng05590D,BnaA06g36850D,BnaC06g27630D,BnaA07g23780D,BnaCnng33260D,	0.56307
GO:0051187	cofactor catabolic process	Biological process	5	0.0223379	2.52466	7	237	745	63681	BnaA05g33840D,BnaCnng13420D,BnaCnng05590D,BnaA06g36850D,BnaC06g27630D,BnaA07g23780D,BnaCnng33260D,	0.56307
GO:0006787	porphyrin-containing compound catabolic process	Biological process	7	0.0223379	2.52466	7	237	745	63681	BnaA05g33840D,BnaCnng13420D,BnaCnng05590D,BnaA06g36850D,BnaC06g27630D,BnaA07g23780D,BnaCnng33260D,	0.56307
GO:0016866	intramolecular transferase activity	Molecular function	4	0.0460605	2.32788	6	224	682	59271	BnaAnng31100D,BnaA08g05070D,BnaA03g06870D,BnaA01g33130D,BnaA03g55140D,BnaA02g00750D,	0.657776
GO:0031978	plastid thylakoid lumen	Cellular component	6	0.0446352	2.34683	6	217	853	72400	BnaA05g29650D,BnaCnng51500D,BnaA03g36010D,BnaAnng23280D,BnaC04g45140D,BnaCnng33260D,	1
GO:0009543	chloroplast thylakoid lumen	Cellular component	7	0.0446352	2.34683	6	217	853	72400	BnaA05g29650D,BnaCnng51500D,BnaA03g36010D,BnaAnng23280D,BnaC04g45140D,BnaCnng33260D,	1
GO:0009831	plant-type cell wall modification involved in multidimensional cell growth	Biological process	8	0.00159404	4.83837	6	106	745	63681	BnaA05g29650D,BnaA03g18690D,BnaC08g26400D,BnaCnng51500D,BnaA04g03540D,BnaC04g47280D,	0.349574
GO:0042547	cell wall modification involved in multidimensional cell growth	Biological process	7	0.00251459	4.42127	6	116	745	63681	BnaA05g29650D,BnaA03g18690D,BnaC08g26400D,BnaCnng51500D,BnaA04g03540D,BnaC04g47280D,	0.290237
GO:0009911	positive regulation of flower development	Biological process	8	0.0154005	3.01687	6	170	745	63681	BnaA05g09840D,BnaC07g39050D,BnaA06g14090D,BnaA05g14370D,BnaC03g33300D,BnaA02g09060D,	0.482477
GO:0010193	response to ozone	Biological process	6	0.0285353	2.61667	6	196	745	63681	BnaA05g33290D,BnaAnng12710D,BnaA03g36010D,BnaA02g09270D,BnaC09g39740D,BnaC07g39340D,	0.553787
GO:0016759	cellulose synthase activity	Molecular function	7	0.0239993	3.08183	5	141	682	59271	BnaAnng01240D,BnaC02g37260D,BnaC02g37250D,BnaA01g33130D,BnaA05g32300D,	0.558155
GO:0000156	phosphorelay response regulator activity	Molecular function	3	0.0382816	2.71586	5	160	682	59271	BnaC09g35410D,BnaAnng00500D,BnaC06g22740D,BnaA03g19150D,BnaA09g36380D,	0.649192
GO:0016638	oxidoreductase activity, acting on the CH-NH2 group of donors	Molecular function	4	0.0494977	2.52638	5	172	682	59271	BnaA02g12280D,BnaA05g18150D,BnaA10g14600D,BnaCnng33000D,BnaC04g19630D,	0.694674
GO:0009061	anaerobic respiration	Biological process	7	0.000144084	9.93929	5	43	745	63681	BnaC03g06750D,BnaC09g06820D,BnaA09g07110D,BnaAnng04700D,BnaC09g46650D,	0.105325
GO:0055081	anion homeostasis	Biological process	7	0.0255479	3.03113	5	141	745	63681	BnaA06g17430D,BnaA01g27810D,BnaC01g15980D,BnaC03g75450D,BnaAnng41260D,	0.565924

## Sheet: GO terms for down regulated
GO_ID	GO_Name	Class	GO_Level	P_value	EnrichmentScore	HitsGenesCountsInSelectedSet	HitsGenesCountsInBackground	AllGenesCountsInSelectedSet	AllGenesCountsInBackground	corrected p-value(BH method)
GO:0044699	single-organism process	Biological process	2	0.0122114	1.07114	345	43455	472	63681	0.199853
GO:0050896	response to stimulus	Biological process	2	0.0342803	1.09024	244	30195	472	63681	0.325574
GO:0044763	single-organism cellular process	Biological process	3	0.0252571	1.09905	240	29462	472	63681	0.278893
GO:0016740	transferase activity	Molecular function	3	0.0209306	1.18663	118	13365	441	59271	0.161963
GO:1901700	response to oxygen-containing compound	Biological process	4	0.00508029	1.25249	114	12280	472	63681	0.150196
GO:0009605	response to external stimulus	Biological process	3	0.0187666	1.22285	97	10702	472	63681	0.238883
GO:0001101	response to acid chemical	Biological process	4	0.0128461	1.27429	81	8576	472	63681	0.208379
GO:0009719	response to endogenous stimulus	Biological process	3	0.0262328	1.23763	79	8612	472	63681	0.281197
GO:0009725	response to hormone	Biological process	5	0.0308554	1.22982	78	8557	472	63681	0.302449
GO:0016310	phosphorylation	Biological process	6	0.0223073	1.25868	74	7932	472	63681	0.260441
GO:0043207	response to external biotic stimulus	Biological process	4	0.0099196	1.3104	73	7516	472	63681	0.180026
GO:0051707	response to other organism	Biological process	5	0.0099196	1.3104	73	7516	472	63681	0.180026
GO:0009607	response to biotic stimulus	Biological process	3	0.0133479	1.29269	73	7619	472	63681	0.21092
GO:0006811	ion transport	Biological process	5	0.000510033	1.48915	70	6342	472	63681	0.233723
GO:0033554	cellular response to stress	Biological process	4	0.0297555	1.26002	66	7067	472	63681	0.296423
GO:0031224	intrinsic component of membrane	Cellular component	3	0.0434348	1.23971	64	7174	521	72400	0.965218
GO:0006468	protein phosphorylation	Biological process	8	0.0012064	1.47745	63	5753	472	63681	0.130079
GO:0016021	integral component of membrane	Cellular component	4	0.0142598	1.32906	61	6378	521	72400	0.950653
GO:0055114	oxidation-reduction process	Biological process	4	0.0443647	1.24693	60	6492	472	63681	0.35052
GO:0016301	kinase activity	Molecular function	5	0.0284222	1.30019	54	5582	441	59271	0.19865
GO:0002376	immune system process	Biological process	2	0.00960605	1.39063	53	5142	472	63681	0.176079
GO:0016773	phosphotransferase activity, alcohol group as acceptor	Molecular function	5	0.015423	1.36218	51	5032	441	59271	0.15423
GO:0006812	cation transport	Biological process	6	0.00108255	1.56595	51	4394	472	63681	0.15264
GO:0005215	transporter activity	Molecular function	2	0.0256702	1.32493	50	5072	441	59271	0.187479
GO:0045087	innate immune response	Biological process	5	0.00849263	1.42263	49	4647	472	63681	0.178931
GO:0006955	immune response	Biological process	3	0.00943605	1.41411	49	4675	472	63681	0.18017
GO:0048518	positive regulation of biological process	Biological process	4	0.0208052	1.34862	49	4902	472	63681	0.255946
GO:1901701	cellular response to oxygen-containing compound	Biological process	5	0.0361995	1.30486	48	4963	472	63681	0.330118
GO:0022857	transmembrane transporter activity	Molecular function	3	0.00595031	1.47766	45	4093	441	59271	0.0840805
GO:0004672	protein kinase activity	Molecular function	6	0.021287	1.36618	45	4427	441	59271	0.162783
GO:0033993	response to lipid	Biological process	5	0.0299374	1.33611	45	4544	472	63681	0.296623
GO:0048583	regulation of response to stimulus	Biological process	4	0.0139912	1.4114	44	4206	472	63681	0.215511
GO:0071229	cellular response to acid chemical	Biological process	5	0.0172798	1.40504	42	4033	472	63681	0.226242
GO:0009617	response to bacterium	Biological process	6	0.00115105	1.66114	41	3330	472	63681	0.131867
GO:0004674	protein serine/threonine kinase activity	Molecular function	7	0.0106252	1.46486	40	3670	441	59271	0.123329
GO:0022892	substrate-specific transporter activity	Molecular function	3	0.0488189	1.31766	39	3978	441	59271	0.268918
GO:0009893	positive regulation of metabolic process	Biological process	5	0.00115082	1.70045	38	3015	472	63681	0.140631
GO:0031347	regulation of defense response	Biological process	6	0.00215625	1.64007	38	3126	472	63681	0.116247
GO:0080134	regulation of response to stress	Biological process	5	0.00476049	1.56307	38	3280	472	63681	0.145433
GO:0006520	cellular amino acid metabolic process	Biological process	8	0.0142757	1.4536	38	3527	472	63681	0.214487
GO:0055085	transmembrane transport	Biological process	5	0.0467389	1.32889	38	3858	472	63681	0.364563
GO:1901615	organic hydroxy compound metabolic process	Biological process	4	0.0337684	1.37066	37	3642	472	63681	0.324071
GO:0022891	substrate-specific transmembrane transporter activity	Molecular function	4	0.0296061	1.39116	36	3478	441	59271	0.194384
GO:0009891	positive regulation of biosynthetic process	Biological process	6	0.000754098	1.77264	36	2740	472	63681	0.153585
GO:0008219	cell death	Biological process	4	0.00159539	1.69707	36	2862	472	63681	0.121848
GO:0009620	response to fungus	Biological process	6	0.00883854	1.54347	34	2972	472	63681	0.180012
GO:0006820	anion transport	Biological process	6	0.0366636	1.38293	34	3317	472	63681	0.326235
GO:0012501	programmed cell death	Biological process	5	0.00254866	1.69352	33	2629	472	63681	0.12294
GO:0009814	defense response, incompatible interaction	Biological process	7	0.0145065	1.49908	33	2970	472	63681	0.216182
GO:0015075	ion transmembrane transporter activity	Molecular function	5	0.0154945	1.50117	32	2865	441	59271	0.152597
GO:0009626	plant-type hypersensitive response	Biological process	7	0.000568014	1.87956	32	2297	472	63681	0.173528
GO:0034050	host programmed cell death induced by symbiont	Biological process	6	0.000593163	1.87467	32	2303	472	63681	0.155324
GO:0030001	metal ion transport	Biological process	7	0.0275363	1.43386	32	3011	472	63681	0.290081
GO:0010941	regulation of cell death	Biological process	5	0.00150232	1.7889	31	2338	472	63681	0.119729
GO:0045088	regulation of innate immune response	Biological process	7	0.00220546	1.74414	31	2398	472	63681	0.115503
GO:0050776	regulation of immune response	Biological process	5	0.00242018	1.73329	31	2413	472	63681	0.119897
GO:0002682	regulation of immune system process	Biological process	4	0.00263654	1.7233	31	2427	472	63681	0.120819
GO:0031325	positive regulation of cellular metabolic process	Biological process	6	0.00399842	1.6914	30	2393	472	63681	0.128581
GO:0043067	regulation of programmed cell death	Biological process	6	0.0039278	1.71155	29	2286	472	63681	0.128565
GO:0051173	positive regulation of nitrogen compound metabolic process	Biological process	6	0.00447653	1.69524	29	2308	472	63681	0.141474
GO:0010604	positive regulation of macromolecule metabolic process	Biological process	6	0.00474655	1.68792	29	2318	472	63681	0.147465
GO:0042592	homeostatic process	Biological process	4	0.0107405	1.58533	29	2468	472	63681	0.18229
GO:0010363	regulation of plant-type hypersensitive response	Biological process	8	0.00205009	1.81445	28	2082	472	63681	0.117432
GO:0031328	positive regulation of cellular biosynthetic process	Biological process	7	0.00343275	1.74812	28	2161	472	63681	0.131088
GO:0080135	regulation of cellular response to stress	Biological process	6	0.00347612	1.7465	28	2163	472	63681	0.117995
GO:0045935	positive regulation of nucleobase-containing compound metabolic process	Biological process	7	0.00343561	1.76919	27	2059	472	63681	0.12852
GO:0010557	positive regulation of macromolecule biosynthetic process	Biological process	7	0.0050627	1.71748	27	2121	472	63681	0.15213
GO:0006612	protein targeting to membrane	Biological process	11	0.0064974	1.68413	27	2163	472	63681	0.167743
GO:0090150	establishment of protein localization to membrane	Biological process	7	0.00816302	1.65355	27	2203	472	63681	0.194322
GO:0072657	protein localization to membrane	Biological process	6	0.00816302	1.65355	27	2203	472	63681	0.194322
GO:0042742	defense response to bacterium	Biological process	7	0.0389311	1.43983	27	2530	472	63681	0.338202
GO:0046395	carboxylic acid catabolic process	Biological process	8	0.00191385	1.87285	26	1873	472	63681	0.120968
GO:0016054	organic acid catabolic process	Biological process	6	0.00191385	1.87285	26	1873	472	63681	0.120968
GO:0010016	shoot system morphogenesis	Biological process	4	0.0113516	1.62626	26	2157	472	63681	0.190895
GO:0009627	systemic acquired resistance	Biological process	8	0.0467206	1.4248	26	2462	472	63681	0.365978
GO:0022804	active transmembrane transporter activity	Molecular function	4	0.0294147	1.50472	25	2233	441	59271	0.201259
GO:0045893	positive regulation of transcription, DNA-templated	Biological process	11	0.00849262	1.68647	25	2000	472	63681	0.187554
GO:0051254	positive regulation of RNA metabolic process	Biological process	8	0.00849262	1.68647	25	2000	472	63681	0.187554
GO:1902680	positive regulation of RNA biosynthetic process	Biological process	9	0.00849262	1.68647	25	2000	472	63681	0.187554
GO:1903508	positive regulation of nucleic acid-templated transcription	Biological process	10	0.00849262	1.68647	25	2000	472	63681	0.187554
GO:0010628	positive regulation of gene expression	Biological process	7	0.0148045	1.60616	25	2100	472	63681	0.20715
GO:0048878	chemical homeostasis	Biological process	5	0.00124636	1.99508	24	1623	472	63681	0.126921
GO:0072593	reactive oxygen species metabolic process	Biological process	4	0.0159432	1.61336	24	2007	472	63681	0.214882
GO:0048585	negative regulation of response to stimulus	Biological process	5	0.0208765	1.57262	24	2059	472	63681	0.255111
GO:0009743	response to carbohydrate	Biological process	5	0.0253032	1.54338	24	2098	472	63681	0.277729
GO:0006720	isoprenoid metabolic process	Biological process	6	0.0359702	1.48943	24	2174	472	63681	0.329667
GO:0008324	cation transmembrane transporter activity	Molecular function	6	0.0171743	1.62014	23	1908	441	59271	0.159476
GO:0042743	hydrogen peroxide metabolic process	Biological process	5	0.0160618	1.65266	22	1796	472	63681	0.2149
GO:0071496	cellular response to external stimulus	Biological process	4	0.0379762	1.51129	22	1964	472	63681	0.333064
GO:0015291	secondary active transmembrane transporter activity	Molecular function	5	0.000406022	2.30779	21	1223	441	59271	0.0175943
GO:0023014	signal transduction by protein phosphorylation	Biological process	9	0.00730297	1.84062	20	1466	472	63681	0.178485
GO:0004871	signal transducer activity	Molecular function	2	0.00121494	2.21477	19	1153	441	59271	0.0343354
GO:0009311	oligosaccharide metabolic process	Biological process	6	5.39403e-05	2.8546	19	898	472	63681	0.0988727
GO:0000165	MAPK cascade	Biological process	10	0.00881013	1.84022	19	1393	472	63681	0.181449
GO:0009862	systemic acquired resistance, salicylic acid mediated signaling pathway	Biological process	7	0.0102002	1.81289	19	1414	472	63681	0.178067
GO:0019725	cellular homeostasis	Biological process	5	0.0300898	1.61121	19	1591	472	63681	0.29653
GO:0005982	starch metabolic process	Biological process	8	0.001137	2.28889	18	1061	472	63681	0.148866
GO:0006721	terpenoid metabolic process	Biological process	7	0.0142005	1.78305	18	1362	472	63681	0.216912
GO:0006865	amino acid transport	Biological process	9	0.0175005	1.74212	18	1394	472	63681	0.227507
GO:0019682	glyceraldehyde-3-phosphate metabolic process	Biological process	6	0.027555	1.65317	18	1469	472	63681	0.288619
GO:0005506	iron ion binding	Molecular function	7	0.0158507	1.79483	17	1273	441	59271	0.151514
GO:0044436	thylakoid part	Cellular component	4	0.0403086	1.60379	17	1473	521	72400	1
GO:0005984	disaccharide metabolic process	Biological process	7	0.000155552	2.81423	17	815	472	63681	0.0950423
GO:0042537	benzene-containing compound metabolic process	Biological process	5	0.0418567	1.59499	17	1438	472	63681	0.360203
GO:0010310	regulation of hydrogen peroxide metabolic process	Biological process	7	0.00390891	2.1458	16	1006	472	63681	0.130273
GO:0055082	cellular chemical homeostasis	Biological process	6	0.00613617	2.0442	16	1056	472	63681	0.165406
GO:2000377	regulation of reactive oxygen species metabolic process	Biological process	6	0.00885821	1.96243	16	1100	472	63681	0.17843
GO:0044242	cellular lipid catabolic process	Biological process	6	0.019008	1.79441	16	1203	472	63681	0.240288
GO:0016042	lipid catabolic process	Biological process	5	0.0282518	1.70781	16	1264	472	63681	0.294236
GO:0006098	pentose-phosphate shunt	Biological process	12	0.00192285	2.38651	15	848	472	63681	0.113696
GO:0051156	glucose 6-phosphate metabolic process	Biological process	6	0.00205592	2.36974	15	854	472	63681	0.114197
GO:0006739	NADP metabolic process	Biological process	11	0.00255607	2.31552	15	874	472	63681	0.120135
GO:0010167	response to nitrate	Biological process	5	0.0230095	1.79094	15	1130	472	63681	0.261965
GO:0009072	aromatic amino acid family metabolic process	Biological process	9	0.0257971	1.76439	15	1147	472	63681	0.281465
GO:0051119	sugar transmembrane transporter activity	Molecular function	6	1.21103e-05	4.07277	14	462	441	59271	0.00787171
GO:0015144	carbohydrate transmembrane transporter activity	Molecular function	5	2.88477e-05	3.76324	14	500	441	59271	0.00468775
GO:1901476	carbohydrate transporter activity	Molecular function	3	2.88477e-05	3.76324	14	500	441	59271	0.00468775
GO:0009746	response to hexose	Biological process	7	0.0106921	2.02666	14	932	472	63681	0.183164
GO:0051606	detection of stimulus	Biological process	3	0.0132949	1.97165	14	958	472	63681	0.211909
GO:0034284	response to monosaccharide	Biological process	6	0.0135138	1.96755	14	960	472	63681	0.211716
GO:0072329	monocarboxylic acid catabolic process	Biological process	9	0.026946	1.79548	14	1052	472	63681	0.285503
GO:0034285	response to disaccharide	Biological process	6	0.0358415	1.72497	14	1095	472	63681	0.331805
GO:0009744	response to sucrose	Biological process	7	0.0358415	1.72497	14	1095	472	63681	0.331805
GO:0009813	flavonoid biosynthetic process	Biological process	5	0.0377053	1.71246	14	1103	472	63681	0.332278
GO:0042579	microbody	Cellular component	6	0.0253316	1.86048	13	971	521	72400	1
GO:0005777	peroxisome	Cellular component	7	0.0253316	1.86048	13	971	521	72400	1
GO:0000023	maltose metabolic process	Biological process	8	0.000844332	2.83348	13	619	472	63681	0.140696
GO:0019252	starch biosynthetic process	Biological process	10	0.00852132	2.1547	13	814	472	63681	0.177495
GO:0043900	regulation of multi-organism process	Biological process	4	0.0147541	2.00449	13	875	472	63681	0.212947
GO:0006778	porphyrin-containing compound metabolic process	Biological process	6	0.0219038	1.89819	13	924	472	63681	0.25903
GO:0033013	tetrapyrrole metabolic process	Biological process	5	0.022931	1.88594	13	930	472	63681	0.262703
GO:0009062	fatty acid catabolic process	Biological process	10	0.0364618	1.76274	13	995	472	63681	0.329234
GO:0015804	neutral amino acid transport	Biological process	10	0.00010155	3.78273	12	428	472	63681	0.0930704
GO:0007166	cell surface receptor signaling pathway	Biological process	6	0.0023852	2.63682	12	614	472	63681	0.121446
GO:0009595	detection of biotic stimulus	Biological process	4	0.00521718	2.38792	12	678	472	63681	0.151795
GO:0043085	positive regulation of catalytic activity	Biological process	5	0.013751	2.09445	12	773	472	63681	0.213606
GO:0044093	positive regulation of molecular function	Biological process	4	0.0146551	2.07565	12	780	472	63681	0.216636
GO:0015994	chlorophyll metabolic process	Biological process	7	0.0182565	2.01119	12	805	472	63681	0.235664
GO:1901606	alpha-amino acid catabolic process	Biological process	10	0.0226671	1.94827	12	831	472	63681	0.261313
GO:0009063	cellular amino acid catabolic process	Biological process	9	0.0247527	1.92281	12	842	472	63681	0.278354
GO:0010374	stomatal complex development	Biological process	6	0.0362893	1.813	12	893	472	63681	0.329298
GO:0005351	sugar:proton symporter activity	Molecular function	9	0.000146021	3.91115	11	378	441	59271	0.0135591
GO:0005402	cation:sugar symporter activity	Molecular function	8	0.000146021	3.91115	11	378	441	59271	0.0135591
GO:0038023	signaling receptor activity	Molecular function	4	0.000227447	3.71461	11	398	441	59271	0.0164268
GO:0015295	solute:proton symporter activity	Molecular function	8	0.000227447	3.71461	11	398	441	59271	0.0164268
GO:0015294	solute:cation symporter activity	Molecular function	7	0.00172349	2.89885	11	510	441	59271	0.0400095
GO:0015293	symporter activity	Molecular function	6	0.00200336	2.84311	11	520	441	59271	0.0434061
GO:0060089	molecular transducer activity	Molecular function	2	0.0037559	2.61666	11	565	441	59271	0.0642457
GO:0004872	receptor activity	Molecular function	3	0.0037559	2.61666	11	565	441	59271	0.0642457
GO:0051640	organelle localization	Biological process	4	0.0261409	1.97353	11	752	472	63681	0.28186
GO:0009750	response to fructose	Biological process	8	0.0399217	1.8413	11	806	472	63681	0.345172
GO:0051213	dioxygenase activity	Molecular function	4	0.0192312	2.16079	10	622	441	59271	0.171237
GO:0015824	proline transport	Biological process	11	0.000629423	3.54114	10	381	472	63681	0.144216
GO:0010103	stomatal complex morphogenesis	Biological process	5	0.0153851	2.24115	10	602	472	63681	0.210454
GO:0030170	pyridoxal phosphate binding	Molecular function	6	0.00362442	2.9867	9	405	441	59271	0.0654409
GO:0070279	vitamin B6 binding	Molecular function	5	0.00362442	2.9867	9	405	441	59271	0.0654409
GO:0019842	vitamin binding	Molecular function	4	0.0170391	2.32171	9	521	441	59271	0.160514
GO:0035251	UDP-glucosyltransferase activity	Molecular function	7	0.0192087	2.27371	9	532	441	59271	0.173412
GO:0015297	antiporter activity	Molecular function	6	0.0217966	2.22355	9	544	441	59271	0.164742
GO:0010114	response to red light	Biological process	7	0.0220408	2.21985	9	547	472	63681	0.258979
GO:0008483	transaminase activity	Molecular function	5	0.000955085	4.02701	8	267	441	59271	0.0310403
GO:0016769	transferase activity, transferring nitrogenous groups	Molecular function	4	0.000955085	4.02701	8	267	441	59271	0.0310403
GO:0004888	transmembrane signaling receptor activity	Molecular function	5	0.000978211	4.01198	8	268	441	59271	0.0289017
GO:0090484	drug transporter activity	Molecular function	3	0.00161118	3.70762	8	290	441	59271	0.0402796
GO:0099600	transmembrane receptor activity	Molecular function	4	0.00253186	3.44619	8	312	441	59271	0.0514283
GO:0016830	carbon-carbon lyase activity	Molecular function	4	0.0156469	2.51217	8	428	441	59271	0.151799
GO:0016706	oxidoreductase activity, acting on paired donors, with incorporation or reduction of molecular oxygen, 2-oxoglutarate as one donor, and incorporation of one atom each of oxygen into both donors	Molecular function	5	0.0276012	2.25411	8	477	441	59271	0.197151
GO:0031226	intrinsic component of plasma membrane	Cellular component	4	0.0494446	2.00308	8	555	521	72400	0.898993
GO:0006855	drug transmembrane transport	Biological process	7	0.00545458	3.03185	8	356	472	63681	0.156223
GO:0015893	drug transport	Biological process	6	0.00681993	2.91713	8	370	472	63681	0.173624
GO:0042493	response to drug	Biological process	4	0.00725373	2.88593	8	374	472	63681	0.179677
GO:0000272	polysaccharide catabolic process	Biological process	6	0.0210004	2.3774	8	454	472	63681	0.254925
GO:0015238	drug transmembrane transporter activity	Molecular function	4	0.00489976	3.40873	7	276	441	59271	0.0723828
GO:0016556	mRNA modification	Biological process	9	0.0100877	2.96988	7	318	472	63681	0.179523
GO:0008643	carbohydrate transport	Biological process	6	0.0149662	2.74541	7	344	472	63681	0.207826
GO:0010029	regulation of seed germination	Biological process	8	0.0260636	2.44669	7	386	472	63681	0.28269
GO:1900140	regulation of seedling development	Biological process	7	0.0318312	2.34348	7	403	472	63681	0.310354
GO:0006766	vitamin metabolic process	Biological process	5	0.0355943	2.28674	7	413	472	63681	0.33288
GO:0051336	regulation of hydrolase activity	Biological process	5	0.0495687	2.1223	7	445	472	63681	0.381763
GO:0050897	cobalt ion binding	Molecular function	7	0.0119265	3.20003	6	252	441	59271	0.136004
GO:0005887	integral component of plasma membrane	Cellular component	5	0.00744558	3.54801	6	235	521	72400	0.744558
GO:0009110	vitamin biosynthetic process	Biological process	6	0.00548906	3.78273	6	214	472	63681	0.152446
GO:0015996	chlorophyll catabolic process	Biological process	8	0.00710353	3.58188	6	226	472	63681	0.178367
GO:0046149	pigment catabolic process	Biological process	5	0.00755564	3.53495	6	229	472	63681	0.18223
GO:0033015	tetrapyrrole catabolic process	Biological process	6	0.00886228	3.41563	6	237	472	63681	0.176571
GO:0051187	cofactor catabolic process	Biological process	5	0.00886228	3.41563	6	237	472	63681	0.176571
GO:0006787	porphyrin-containing compound catabolic process	Biological process	7	0.00886228	3.41563	6	237	472	63681	0.176571
GO:0043087	regulation of GTPase activity	Biological process	6	0.0105171	3.29067	6	246	472	63681	0.181866
GO:0009686	gibberellin biosynthetic process	Biological process	10	0.0117351	3.21232	6	252	472	63681	0.195549
GO:0009064	glutamine family amino acid metabolic process	Biological process	10	0.0132779	3.1255	6	259	472	63681	0.213495
GO:0016102	diterpenoid biosynthetic process	Biological process	9	0.0142205	3.07796	6	263	472	63681	0.215422
GO:0009685	gibberellin metabolic process	Biological process	9	0.0218251	2.79139	6	290	472	63681	0.259776
GO:0016101	diterpenoid metabolic process	Biological process	8	0.0326256	2.53763	6	319	472	63681	0.316417
GO:0010155	regulation of proton transport	Biological process	7	0.0453586	2.33961	6	346	472	63681	0.356834
GO:0030048	actin filament-based movement	Biological process	5	0.0469396	2.3195	6	349	472	63681	0.364577
GO:0016877	ligase activity, forming carbon-sulfur bonds	Molecular function	4	0.0241648	3.0826	5	218	441	59271	0.180542
GO:0008081	phosphoric diester hydrolase activity	Molecular function	6	0.0405173	2.67732	5	251	441	59271	0.248455
GO:0030695	GTPase regulator activity	Molecular function	5	0.0410961	2.66669	5	252	441	59271	0.249649
GO:0009081	branched-chain amino acid metabolic process	Biological process	9	0.00303591	5.14952	5	131	472	63681	0.126473
GO:0005985	sucrose metabolic process	Biological process	8	0.00345301	4.99694	5	135	472	63681	0.119422
GO:0051645	Golgi localization	Biological process	5	0.00838375	4.03944	5	167	472	63681	0.189721
GO:0060151	peroxisome localization	Biological process	5	0.00838375	4.03944	5	167	472	63681	0.189721
GO:0051646	mitochondrion localization	Biological process	5	0.00922835	3.94495	5	171	472	63681	0.178059
GO:0046482	para-aminobenzoic acid metabolic process	Biological process	10	0.0185168	3.3068	5	204	472	63681	0.237352
GO:0009773	photosynthetic electron transport in photosystem I	Biological process	7	0.0226228	3.13761	5	215	472	63681	0.262453
GO:0009610	response to symbiotic fungus	Biological process	7	0.0263891	3.01155	5	224	472	63681	0.281228
GO:0009608	response to symbiont	Biological process	6	0.0286442	2.94579	5	229	472	63681	0.296638
