# Supplementary material for: Overdominance at the Gene Expression Level Plays a Critical Role in the Hybrid Root Growth of Brassica napus
Source: Int J Mol Sci. 2021 Aug 26;22(17):9246. doi: 10.3390/ijms22179246 (PMC8431428; doi:10.3390/ijms22179246)
Supplement: Supplementary file 1 [file ijms-22-09246-s001.zip › ijms-1346590-supplementary/Supplementary Materials/Supplementary file 13.xlsx]

## Sheet: GO terms for up-regulated
GO_ID	GO_Name	Class	GO_Level	P_value	EnrichmentScore	HitsGenesCountsInSelectedSet	HitsGenesCountsInBackground	AllGenesCountsInSelectedSet	AllGenesCountsInBackground	corrected p-value(BH method)
GO:0005634	nucleus	Cellular component	6	0.0200165	1.08489	378	30466	828	72400	1
GO:0009058	biosynthetic process	Biological process	3	0.00680113	1.10831	336	27423	704	63681	0.120814
GO:1901576	organic substance biosynthetic process	Biological process	4	0.00594045	1.11258	330	26830	704	63681	0.113573
GO:0065007	biological regulation	Biological process	2	0.00358674	1.12141	329	26538	704	63681	0.0842884
GO:0044249	cellular biosynthetic process	Biological process	4	0.00817427	1.11325	311	25270	704	63681	0.136601
GO:0050789	regulation of biological process	Biological process	3	0.0324847	1.0927	284	23510	704	63681	0.291974
GO:0050794	regulation of cellular process	Biological process	4	0.0092182	1.13125	257	20550	704	63681	0.137724
GO:0006950	response to stress	Biological process	3	0.0306692	1.10966	236	19238	704	63681	0.283564
GO:0042221	response to chemical	Biological process	3	0.021375	1.12148	231	18632	704	63681	0.228541
GO:1901362	organic cyclic compound biosynthetic process	Biological process	5	0.000648507	1.22142	207	15330	704	63681	0.031805
GO:0044271	cellular nitrogen compound biosynthetic process	Biological process	5	0.00215925	1.19758	201	15182	704	63681	0.0632631
GO:0019438	aromatic compound biosynthetic process	Biological process	5	0.000392249	1.24197	197	14348	704	63681	0.0201117
GO:0018130	heterocycle biosynthetic process	Biological process	5	0.000792129	1.2395	182	13282	704	63681	0.0350401
GO:0019222	regulation of metabolic process	Biological process	4	0.00584745	1.18828	178	13550	704	63681	0.114712
GO:0009628	response to abiotic stimulus	Biological process	3	0.0196858	1.15243	175	13736	704	63681	0.215588
GO:0044711	single-organism biosynthetic process	Biological process	4	0.0256154	1.14352	175	13843	704	63681	0.252351
GO:0080090	regulation of primary metabolic process	Biological process	5	0.000599052	1.26316	167	11959	704	63681	0.0300325
GO:1901700	response to oxygen-containing compound	Biological process	4	0.00194785	1.23014	167	12280	704	63681	0.0618924
GO:0031323	regulation of cellular metabolic process	Biological process	5	0.00956511	1.18824	159	12104	704	63681	0.139219
GO:0009889	regulation of biosynthetic process	Biological process	5	0.000323448	1.29436	156	10902	704	63681	0.0187102
GO:0048731	system development	Biological process	4	0.0429617	1.13819	152	12080	704	63681	0.333064
GO:0034654	nucleobase-containing compound biosynthetic process	Biological process	6	0.0467554	1.1385	146	11600	704	63681	0.335924
GO:0051171	regulation of nitrogen compound metabolic process	Biological process	5	0.0240825	1.16629	145	11246	704	63681	0.240399
GO:0009605	response to external stimulus	Biological process	3	0.0105804	1.20022	142	10702	704	63681	0.147342
GO:0031326	regulation of cellular biosynthetic process	Biological process	6	0.00771058	1.21494	139	10349	704	63681	0.132787
GO:0043169	cation binding	Molecular function	4	0.0118526	1.19877	137	10551	642	59271	0.229565
GO:2000112	regulation of cellular macromolecule biosynthetic process	Biological process	7	0.00824798	1.21573	136	10119	704	63681	0.136819
GO:0010556	regulation of macromolecule biosynthetic process	Biological process	6	0.00865426	1.21393	136	10134	704	63681	0.137493
GO:0010468	regulation of gene expression	Biological process	6	0.0469945	1.14512	136	10743	704	63681	0.33657
GO:0046872	metal ion binding	Molecular function	5	0.0163484	1.18836	135	10488	642	59271	0.279824
GO:0006351	transcription, DNA-templated	Biological process	10	0.0103154	1.20945	134	10022	704	63681	0.146361
GO:0097659	nucleic acid-templated transcription	Biological process	9	0.0107771	1.20776	134	10036	704	63681	0.14916
GO:0032774	RNA biosynthetic process	Biological process	8	0.0118991	1.20392	134	10068	704	63681	0.158842
GO:0019219	regulation of nucleobase-containing compound metabolic process	Biological process	6	0.0134806	1.20324	130	9773	704	63681	0.170855
GO:0006355	regulation of transcription, DNA-templated	Biological process	10	0.00382404	1.25429	128	9231	704	63681	0.0871417
GO:1903506	regulation of nucleic acid-templated transcription	Biological process	9	0.00382404	1.25429	128	9231	704	63681	0.0871417
GO:2001141	regulation of RNA biosynthetic process	Biological process	8	0.00403912	1.25226	128	9246	704	63681	0.0902204
GO:0051252	regulation of RNA metabolic process	Biological process	7	0.0051167	1.24338	128	9312	704	63681	0.104939
GO:0001101	response to acid chemical	Biological process	4	0.00936087	1.23407	117	8576	704	63681	0.138027
GO:0003677	DNA binding	Molecular function	5	0.000932668	1.34107	108	7435	642	59271	0.0980634
GO:0010035	response to inorganic substance	Biological process	4	0.00285992	1.29841	108	7524	704	63681	0.0768093
GO:0033554	cellular response to stress	Biological process	4	0.00110336	1.34398	105	7067	704	63681	0.0436699
GO:0043207	response to external biotic stimulus	Biological process	4	0.0292756	1.20351	100	7516	704	63681	0.275191
GO:0051707	response to other organism	Biological process	5	0.0292756	1.20351	100	7516	704	63681	0.275191
GO:0009607	response to biotic stimulus	Biological process	3	0.0396683	1.18724	100	7619	704	63681	0.318476
GO:0006811	ion transport	Biological process	5	0.00103336	1.36925	96	6342	704	63681	0.0431715
GO:0006629	lipid metabolic process	Biological process	4	0.026724	1.22005	92	6821	704	63681	0.260993
GO:0044283	small molecule biosynthetic process	Biological process	5	0.027367	1.2252	88	6497	704	63681	0.263846
GO:0003700	transcription factor activity, sequence-specific DNA binding	Molecular function	3	0.00505998	1.31845	86	6022	642	59271	0.148966
GO:0001071	nucleic acid binding transcription factor activity	Molecular function	2	0.00534917	1.31561	86	6035	642	59271	0.151423
GO:0009416	response to light stimulus	Biological process	5	0.0108143	1.29692	79	5510	704	63681	0.147862
GO:0009314	response to radiation	Biological process	4	0.0298097	1.23634	79	5780	704	63681	0.276751
GO:0002376	immune system process	Biological process	2	0.0124214	1.30178	74	5142	704	63681	0.16105
GO:0045087	innate immune response	Biological process	5	0.00167952	1.42098	73	4647	704	63681	0.0565522
GO:0006955	immune response	Biological process	3	0.00195641	1.41247	73	4675	704	63681	0.0613008
GO:0048518	positive regulation of biological process	Biological process	4	0.00878677	1.32861	72	4902	704	63681	0.13485
GO:0009266	response to temperature stimulus	Biological process	4	0.0133023	1.30589	71	4918	704	63681	0.169548
GO:0006812	cation transport	Biological process	6	0.00147305	1.44104	70	4394	704	63681	0.0527494
GO:0006970	response to osmotic stress	Biological process	4	0.00807875	1.34009	70	4725	704	63681	0.137035
GO:0048583	regulation of response to stimulus	Biological process	4	0.00075396	1.48394	69	4206	704	63681	0.0354361
GO:0009651	response to salt stress	Biological process	5	0.0162786	1.31066	65	4486	704	63681	0.19431
GO:0080134	regulation of response to stress	Biological process	5	6.24469e-05	1.68226	61	3280	704	63681	0.00782667
GO:0031347	regulation of defense response	Biological process	6	0.000100876	1.67833	58	3126	704	63681	0.00875295
GO:0071229	cellular response to acid chemical	Biological process	5	0.0354132	1.27845	57	4033	704	63681	0.30148
GO:0044262	cellular carbohydrate metabolic process	Biological process	5	0.00816947	1.40443	54	3478	704	63681	0.13754
GO:0006520	cellular amino acid metabolic process	Biological process	8	0.0105547	1.38492	54	3527	704	63681	0.147897
GO:0008219	cell death	Biological process	4	0.0002102	1.67511	53	2862	704	63681	0.01437
GO:0005976	polysaccharide metabolic process	Biological process	5	0.0179191	1.35242	52	3478	704	63681	0.206252
GO:0006790	sulfur compound metabolic process	Biological process	4	0.0206384	1.34085	52	3508	704	63681	0.223847
GO:1901615	organic hydroxy compound metabolic process	Biological process	4	0.0370944	1.29152	52	3642	704	63681	0.308801
GO:0012501	programmed cell death	Biological process	5	9.18325e-05	1.75476	51	2629	704	63681	0.00828697
GO:0044282	small molecule catabolic process	Biological process	5	0.001675	1.54997	50	2918	704	63681	0.0572546
GO:0045088	regulation of innate immune response	Biological process	7	3.60206e-05	1.84835	49	2398	704	63681	0.00625096
GO:0050776	regulation of immune response	Biological process	5	4.20089e-05	1.83686	49	2413	704	63681	0.00676943
GO:0002682	regulation of immune system process	Biological process	4	4.84083e-05	1.82626	49	2427	704	63681	0.00728061
GO:0072330	monocarboxylic acid biosynthetic process	Biological process	9	0.0187087	1.36795	48	3174	704	63681	0.207915
GO:0009626	plant-type hypersensitive response	Biological process	7	5.0261e-05	1.85086	47	2297	704	63681	0.0070868
GO:0034050	host programmed cell death induced by symbiont	Biological process	6	5.34713e-05	1.84604	47	2303	704	63681	0.00709596
GO:0030001	metal ion transport	Biological process	7	0.0119818	1.41197	47	3011	704	63681	0.157156
GO:0009891	positive regulation of biosynthetic process	Biological process	6	0.00368823	1.5186	46	2740	704	63681	0.0857799
GO:0044264	cellular polysaccharide metabolic process	Biological process	6	0.00830472	1.44982	46	2870	704	63681	0.136755
GO:0009893	positive regulation of metabolic process	Biological process	5	0.0183884	1.38009	46	3015	704	63681	0.21058
GO:0043067	regulation of programmed cell death	Biological process	6	0.000171805	1.78063	45	2286	704	63681	0.0138426
GO:0010941	regulation of cell death	Biological process	5	0.000279157	1.74103	45	2338	704	63681	0.0174938
GO:0009814	defense response, incompatible interaction	Biological process	7	0.0317214	1.34009	44	2970	704	63681	0.287404
GO:0010363	regulation of plant-type hypersensitive response	Biological process	8	8.52068e-05	1.86821	43	2082	704	63681	0.00835768
GO:0080135	regulation of cellular response to stress	Biological process	6	0.000193867	1.79825	43	2163	704	63681	0.0150815
GO:0090150	establishment of protein localization to membrane	Biological process	7	0.000284365	1.7656	43	2203	704	63681	0.0173386
GO:0072657	protein localization to membrane	Biological process	6	0.000284365	1.7656	43	2203	704	63681	0.0173386
GO:0006979	response to oxidative stress	Biological process	4	0.0093837	1.46006	43	2664	704	63681	0.137465
GO:1901605	alpha-amino acid metabolic process	Biological process	9	0.0146374	1.41905	43	2741	704	63681	0.18144
GO:0006612	protein targeting to membrane	Biological process	11	0.000370501	1.75643	42	2163	704	63681	0.0199012
GO:0000271	polysaccharide biosynthetic process	Biological process	7	0.0143418	1.42772	42	2661	704	63681	0.17975
GO:1901617	organic hydroxy compound biosynthetic process	Biological process	5	0.0422289	1.3269	41	2795	704	63681	0.330793
GO:0046395	carboxylic acid catabolic process	Biological process	8	7.45374e-05	1.93179	40	1873	704	63681	0.00840782
GO:0016054	organic acid catabolic process	Biological process	6	7.45374e-05	1.93179	40	1873	704	63681	0.00840782
GO:0010016	shoot system morphogenesis	Biological process	4	0.0021341	1.6355	39	2157	704	63681	0.063349
GO:0009414	response to water deprivation	Biological process	6	0.00766206	1.51212	39	2333	704	63681	0.132966
GO:0009415	response to water	Biological process	5	0.00895907	1.49673	39	2357	704	63681	0.136565
GO:0034637	cellular carbohydrate biosynthetic process	Biological process	7	0.0162903	1.43698	39	2455	704	63681	0.193425
GO:0033692	cellular polysaccharide biosynthetic process	Biological process	8	0.00851471	1.51091	38	2275	704	63681	0.136235
GO:0009627	systemic acquired resistance	Biological process	8	0.0259224	1.39615	38	2462	704	63681	0.254265
GO:0006073	cellular glucan metabolic process	Biological process	7	0.00230579	1.65278	37	2025	704	63681	0.0658462
GO:0044042	glucan metabolic process	Biological process	6	0.00230579	1.65278	37	2025	704	63681	0.0658462
GO:0010817	regulation of hormone levels	Biological process	4	0.0229621	1.41637	37	2363	704	63681	0.232298
GO:0048507	meristem development	Biological process	5	0.0356921	1.3683	37	2446	704	63681	0.302712
GO:0009308	amine metabolic process	Biological process	5	4.4804e-06	2.45097	32	1181	704	63681	0.00144397
GO:0042445	hormone metabolic process	Biological process	5	0.00535696	1.66076	30	1634	704	63681	0.107904
GO:0009863	salicylic acid mediated signaling pathway	Biological process	6	0.048847	1.38241	30	1963	704	63681	0.344372
GO:0009250	glucan biosynthetic process	Biological process	9	0.00128198	1.85649	29	1413	704	63681	0.0474124
GO:0042446	hormone biosynthetic process	Biological process	6	0.00850165	1.67035	26	1408	704	63681	0.136998
GO:0009738	abscisic acid-activated signaling pathway	Biological process	7	0.0159993	1.58161	26	1487	704	63681	0.191991
GO:0071215	cellular response to abscisic acid stimulus	Biological process	7	0.0351523	1.46899	26	1601	704	63681	0.303845
GO:0097306	cellular response to alcohol	Biological process	6	0.0351523	1.46899	26	1601	704	63681	0.303845
GO:0000302	response to reactive oxygen species	Biological process	5	0.0362753	1.46442	26	1606	704	63681	0.304227
GO:0044106	cellular amine metabolic process	Biological process	6	3.26283e-05	2.51267	25	900	704	63681	0.00920119
GO:0006576	cellular biogenic amine metabolic process	Biological process	7	3.29473e-05	2.56916	24	845	704	63681	0.00825878
GO:0050801	ion homeostasis	Biological process	6	0.0186432	1.59277	24	1363	704	63681	0.208213
GO:0009862	systemic acquired resistance, salicylic acid mediated signaling pathway	Biological process	7	0.0271622	1.53532	24	1414	704	63681	0.262996
GO:0015698	inorganic anion transport	Biological process	7	0.0396498	1.47683	24	1470	704	63681	0.319464
GO:0006972	hyperosmotic response	Biological process	5	0.0425354	1.46586	24	1481	704	63681	0.332041
GO:1901606	alpha-amino acid catabolic process	Biological process	10	7.02314e-05	2.50359	23	831	704	63681	0.00833905
GO:0009063	cellular amino acid catabolic process	Biological process	9	8.52857e-05	2.47089	23	842	704	63681	0.00801685
GO:0009072	aromatic amino acid family metabolic process	Biological process	9	0.00510167	1.81385	23	1147	704	63681	0.10559
GO:0055080	cation homeostasis	Biological process	7	0.010884	1.69559	23	1227	704	63681	0.147918
GO:0000041	transition metal ion transport	Biological process	8	0.0173093	1.62284	23	1282	704	63681	0.20233
GO:0005509	calcium ion binding	Molecular function	6	0.00344178	1.90534	22	1066	642	59271	0.120626
GO:0005506	iron ion binding	Molecular function	7	0.0230563	1.59552	22	1273	642	59271	0.308535
GO:0034754	cellular hormone metabolic process	Biological process	6	0.000199412	2.38327	22	835	704	63681	0.0149958
GO:0009965	leaf morphogenesis	Biological process	5	0.00356475	1.9007	22	1047	704	63681	0.0846533
GO:0005982	starch metabolic process	Biological process	8	0.00415703	1.87562	22	1061	704	63681	0.0919438
GO:0010167	response to nitrate	Biological process	5	0.00840132	1.76109	22	1130	704	63681	0.136355
GO:0009812	flavonoid metabolic process	Biological process	4	0.0236538	1.59203	22	1250	704	63681	0.238227
GO:0048509	regulation of meristem development	Biological process	5	0.0107901	1.74593	21	1088	704	63681	0.148429
GO:0032879	regulation of localization	Biological process	4	0.022488	1.6208	21	1172	704	63681	0.229561
GO:0044242	cellular lipid catabolic process	Biological process	6	0.028685	1.57903	21	1203	704	63681	0.271904
GO:0016042	lipid catabolic process	Biological process	5	0.0445352	1.50283	21	1264	704	63681	0.329415
GO:0004497	monooxygenase activity	Molecular function	4	0.00433879	1.93548	20	954	642	59271	0.133056
GO:0051049	regulation of transport	Biological process	5	0.00832897	1.82004	20	994	704	63681	0.13616
GO:0009813	flavonoid biosynthetic process	Biological process	5	0.0228686	1.64018	20	1103	704	63681	0.232394
GO:0015706	nitrate transport	Biological process	8	0.0277963	1.60525	20	1127	704	63681	0.265714
GO:0004871	signal transducer activity	Molecular function	2	0.0488139	1.52136	19	1153	642	59271	0.427703
GO:0019252	starch biosynthetic process	Biological process	10	0.00212613	2.11138	19	814	704	63681	0.063954
GO:0008509	anion transmembrane transporter activity	Molecular function	6	0.0434304	1.56479	18	1062	642	59271	0.39956
GO:0006873	cellular ion homeostasis	Biological process	7	0.0293021	1.64299	18	991	704	63681	0.273164
GO:0019344	cysteine biosynthetic process	Biological process	12	0.0414261	1.57467	18	1034	704	63681	0.325635
GO:0006534	cysteine metabolic process	Biological process	11	0.0478044	1.54626	18	1053	704	63681	0.341287
GO:0006470	protein dephosphorylation	Biological process	8	0.0485143	1.54332	18	1055	704	63681	0.344177
GO:0055082	cellular chemical homeostasis	Biological process	6	0.048872	1.54186	18	1056	704	63681	0.343475
GO:0009962	regulation of flavonoid biosynthetic process	Biological process	6	0.0016111	2.28153	17	674	704	63681	0.0559174
GO:0048513	animal organ development	Biological process	4	0.00320778	2.1328	17	721	704	63681	0.083181
GO:0042435	indole-containing compound biosynthetic process	Biological process	6	0.00377863	2.09789	17	733	704	63681	0.0869856
GO:0043269	regulation of ion transport	Biological process	6	0.00964492	1.90081	17	809	704	63681	0.13948
GO:0005984	disaccharide metabolic process	Biological process	7	0.0103154	1.88681	17	815	704	63681	0.145448
GO:0042430	indole-containing compound metabolic process	Biological process	5	0.0185153	1.7655	17	871	704	63681	0.207813
GO:0006066	alcohol metabolic process	Biological process	5	0.0215972	1.73365	17	887	704	63681	0.229827
GO:0009311	oligosaccharide metabolic process	Biological process	6	0.0239327	1.71242	17	898	704	63681	0.239965
GO:0030003	cellular cation homeostasis	Biological process	8	0.0340558	1.63939	17	938	704	63681	0.295499
GO:0009963	positive regulation of flavonoid biosynthetic process	Biological process	7	0.000995203	2.46558	16	587	704	63681	0.0423618
GO:0044093	positive regulation of molecular function	Biological process	4	0.0144951	1.85551	16	780	704	63681	0.180668
GO:0042542	response to hydrogen peroxide	Biological process	6	0.0376522	1.64652	16	879	704	63681	0.312291
GO:0019825	oxygen binding	Molecular function	3	0.0165195	1.86888	15	741	642	59271	0.276327
GO:0009684	indoleacetic acid biosynthetic process	Biological process	10	0.00244902	2.32734	15	583	704	63681	0.0682097
GO:0009683	indoleacetic acid metabolic process	Biological process	9	0.00256965	2.31543	15	586	704	63681	0.0706968
GO:0000023	maltose metabolic process	Biological process	8	0.00425209	2.19199	15	619	704	63681	0.0896515
GO:0009310	amine catabolic process	Biological process	6	0.00638805	2.09389	15	648	704	63681	0.115292
GO:0042402	cellular biogenic amine catabolic process	Biological process	8	0.00638805	2.09389	15	648	704	63681	0.115292
GO:0009851	auxin biosynthetic process	Biological process	7	0.00710852	2.06835	15	656	704	63681	0.125288
GO:0009850	auxin metabolic process	Biological process	6	0.0216277	1.80671	15	751	704	63681	0.229071
GO:0043085	positive regulation of catalytic activity	Biological process	5	0.026986	1.75529	15	773	704	63681	0.262416
GO:0009074	aromatic amino acid family catabolic process	Biological process	10	0.000776492	2.72927	14	464	704	63681	0.0357503
GO:0006568	tryptophan metabolic process	Biological process	10	0.0020545	2.459	14	515	704	63681	0.0634926
GO:0006586	indolalkylamine metabolic process	Biological process	8	0.0020545	2.459	14	515	704	63681	0.0634926
GO:0022853	active ion transmembrane transporter activity	Molecular function	6	0.00913235	2.13557	13	562	642	59271	0.224047
GO:0046218	indolalkylamine catabolic process	Biological process	9	0.00108798	2.75393	13	427	704	63681	0.0446271
GO:0006569	tryptophan catabolic process	Biological process	11	0.00108798	2.75393	13	427	704	63681	0.0446271
GO:0042436	indole-containing compound catabolic process	Biological process	6	0.00261144	2.49137	13	472	704	63681	0.070981
GO:0035304	regulation of protein dephosphorylation	Biological process	9	0.0395485	1.74211	13	675	704	63681	0.31979
GO:0035303	regulation of dephosphorylation	Biological process	8	0.0403264	1.73697	13	677	704	63681	0.321471
GO:0016830	carbon-carbon lyase activity	Molecular function	4	0.00275611	2.58848	12	428	642	59271	0.112694
GO:0016627	oxidoreductase activity, acting on the CH-CH group of donors	Molecular function	4	0.0299334	1.86824	12	593	642	59271	0.361164
GO:0043647	inositol phosphate metabolic process	Biological process	7	0.00119921	2.86404	12	379	704	63681	0.0450902
GO:0015748	organophosphate ester transport	Biological process	6	0.00176722	2.73419	12	397	704	63681	0.0586301
GO:0019751	polyol metabolic process	Biological process	6	0.0159077	2.05193	12	529	704	63681	0.191914
GO:0042625	ATPase coupled ion transmembrane transporter activity	Molecular function	12	0.0209417	2.04335	11	497	642	59271	0.308263
GO:0009309	amine biosynthetic process	Biological process	6	3.48517e-05	4.58533	11	217	704	63681	0.00714776
GO:0042401	cellular biogenic amine biosynthetic process	Biological process	8	3.48517e-05	4.58533	11	217	704	63681	0.00714776
GO:0046165	alcohol biosynthetic process	Biological process	6	0.0328174	1.90252	11	523	704	63681	0.288078
GO:0015144	carbohydrate transmembrane transporter activity	Molecular function	5	0.0478326	1.84645	10	500	642	59271	0.429327
GO:1901476	carbohydrate transporter activity	Molecular function	3	0.0478326	1.84645	10	500	642	59271	0.429327
GO:0010155	regulation of proton transport	Biological process	7	0.00561847	2.61433	10	346	704	63681	0.111187
GO:0006766	vitamin metabolic process	Biological process	5	0.0177147	2.19022	10	413	704	63681	0.204946
GO:0031163	metallo-sulfur cluster assembly	Biological process	5	0.0193541	2.15885	10	419	704	63681	0.214034
GO:0016226	iron-sulfur cluster assembly	Biological process	6	0.0193541	2.15885	10	419	704	63681	0.214034
GO:0019375	galactolipid biosynthetic process	Biological process	9	0.0442901	1.87279	10	483	704	63681	0.328679
GO:0019374	galactolipid metabolic process	Biological process	8	0.0495585	1.83481	10	493	704	63681	0.347217
GO:0033517	myo-inositol hexakisphosphate metabolic process	Biological process	8	0.00322512	3.0377	9	268	704	63681	0.0826803
GO:0010264	myo-inositol hexakisphosphate biosynthetic process	Biological process	9	0.00322512	3.0377	9	268	704	63681	0.0826803
GO:0032958	inositol phosphate biosynthetic process	Biological process	8	0.00338624	3.0152	9	270	704	63681	0.0839489
GO:0052543	callose deposition in cell wall	Biological process	8	0.0053694	2.80725	9	290	704	63681	0.107198
GO:0006595	polyamine metabolic process	Biological process	8	0.00585614	2.76906	9	294	704	63681	0.113892
GO:0097164	ammonium ion metabolic process	Biological process	4	0.00585614	2.76906	9	294	704	63681	0.113892
GO:0046173	polyol biosynthetic process	Biological process	7	0.00637622	2.73189	9	298	704	63681	0.116006
GO:0052386	cell wall thickening	Biological process	7	0.00783181	2.64319	9	308	704	63681	0.133853
GO:0009955	adaxial/abaxial pattern specification	Biological process	6	0.0354073	2.03526	9	400	704	63681	0.302572
GO:0009798	axis specification	Biological process	5	0.0378227	2.01013	9	405	704	63681	0.312557
GO:0009887	animal organ morphogenesis	Biological process	4	0.0451763	1.94297	9	419	704	63681	0.33198
GO:0016831	carboxy-lyase activity	Molecular function	5	0.00896484	2.77661	8	266	642	59271	0.227522
GO:0051082	unfolded protein binding	Molecular function	4	0.0176868	2.45375	8	301	642	59271	0.289278
GO:0009556	microsporogenesis	Biological process	7	0.00229412	3.49588	8	207	704	63681	0.0663529
GO:0040034	regulation of development, heterochronic	Biological process	5	0.00314886	3.31948	8	218	704	63681	0.0826028
GO:0034293	sexual sporulation	Biological process	5	0.0034202	3.27442	8	221	704	63681	0.0838692
GO:0043934	sporulation	Biological process	4	0.0034202	3.27442	8	221	704	63681	0.0838692
GO:0048236	plant-type sporogenesis	Biological process	6	0.0034202	3.27442	8	221	704	63681	0.0838692
GO:0000303	response to superoxide	Biological process	7	0.00865939	2.79401	8	259	704	63681	0.136613
GO:0000305	response to oxygen radical	Biological process	6	0.00865939	2.79401	8	259	704	63681	0.136613
GO:0009410	response to xenobiotic stimulus	Biological process	4	0.0351729	2.14732	8	337	704	63681	0.301711
GO:0009944	polarity specification of adaxial/abaxial axis	Biological process	6	0.0411768	2.07945	8	348	704	63681	0.324807
GO:0009943	adaxial/abaxial axis specification	Biological process	6	0.0435187	2.05582	8	352	704	63681	0.32402
GO:0065001	specification of axis polarity	Biological process	5	0.0447219	2.0442	8	354	704	63681	0.329715
GO:0032440	2-alkenal reductase [NAD(P)] activity	Molecular function	6	0.0386203	2.24395	7	288	642	59271	0.424246
GO:0006596	polyamine biosynthetic process	Biological process	9	3.35487e-05	7.81718	7	81	704	63681	0.00756858
GO:0009110	vitamin biosynthetic process	Biological process	6	0.0101991	2.95884	7	214	704	63681	0.145628
GO:0009690	cytokinin metabolic process	Biological process	7	0.020786	2.56353	7	247	704	63681	0.223301
GO:2000242	negative regulation of reproductive process	Biological process	5	0.0367126	2.2695	7	279	704	63681	0.306755
GO:0048439	flower morphogenesis	Biological process	5	0.0391451	2.23743	7	283	704	63681	0.317667
GO:0048506	regulation of timing of meristematic phase transition	Biological process	6	0.0113323	3.23057	6	168	704	63681	0.153088
GO:0048510	regulation of timing of transition from vegetative to reproductive phase	Biological process	7	0.0113323	3.23057	6	168	704	63681	0.153088
GO:2000280	regulation of root development	Biological process	6	0.0139869	3.08373	6	176	704	63681	0.176282
GO:0016597	amino acid binding	Molecular function	6	0.0367445	2.74769	5	168	642	59271	0.409757
GO:0009446	putrescine biosynthetic process	Biological process	10	1.66503e-06	23.8042	5	19	704	63681	0.00075126
GO:0009445	putrescine metabolic process	Biological process	9	2.86092e-06	21.5371	5	21	704	63681	0.00107571
GO:0016119	carotene metabolic process	Biological process	8	0.000390406	8.07643	5	56	704	63681	0.0204827
GO:0008295	spermidine biosynthetic process	Biological process	10	0.00077813	6.95815	5	65	704	63681	0.0351092
GO:0008216	spermidine metabolic process	Biological process	9	0.000893503	6.75045	5	67	704	63681	0.0387643
GO:0042214	terpene metabolic process	Biological process	7	0.00475365	4.6151	5	98	704	63681	0.0992985
GO:0010449	root meristem growth	Biological process	6	0.00610077	4.34884	5	104	704	63681	0.115658
GO:0010109	regulation of photosynthesis	Biological process	6	0.00922966	3.93287	5	115	704	63681	0.136988
GO:0048574	long-day photoperiodism, flowering	Biological process	8	0.0150658	3.47908	5	130	704	63681	0.182734
GO:0016045	detection of bacterium	Biological process	7	0.0164726	3.4006	5	133	704	63681	0.194567
GO:0098543	detection of other organism	Biological process	6	0.0174574	3.35022	5	135	704	63681	0.20301
GO:0098581	detection of external biotic stimulus	Biological process	5	0.0184803	3.30131	5	137	704	63681	0.208458
GO:0048571	long-day photoperiodism	Biological process	7	0.0206428	3.20766	5	141	704	63681	0.222824

## Sheet: GO terms for down-regulated
GO_ID	GO_Name	Class	GO_Level	P_value	EnrichmentScore	HitsGenesCountsInSelectedSet	HitsGenesCountsInBackground	AllGenesCountsInSelectedSet	AllGenesCountsInBackground	corrected p-value(BH method)
GO:0008152	metabolic process	Biological process	2	0.00153015	1.06175	535	49366	650	63681	0.00939946
GO:0009987	cellular process	Biological process	2	0.0237909	1.0417	527	49564	650	63681	0.0926345
GO:0044699	single-organism process	Biological process	2	1.11445e-08	1.1453	508	43455	650	63681	2.3204e-07
GO:0071704	organic substance metabolic process	Biological process	3	0.0190458	1.05719	462	42814	650	63681	0.078813
GO:0044237	cellular metabolic process	Biological process	3	0.000939682	1.09306	448	40154	650	63681	0.00623722
GO:0005737	cytoplasm	Cellular component	4	0.000185676	1.1173	438	41494	684	72400	0.000875331
GO:0044238	primary metabolic process	Biological process	3	0.0262592	1.05942	431	39857	650	63681	0.0995033
GO:0044444	cytoplasmic part	Cellular component	4	3.69493e-10	1.24335	411	34989	684	72400	4.22075e-09
GO:0044763	single-organism cellular process	Biological process	3	1.47408e-10	1.26695	381	29462	650	63681	4.77987e-09
GO:0003824	catalytic activity	Molecular function	2	9.03685e-05	1.14093	366	32336	588	59271	0.00415695
GO:0044710	single-organism metabolic process	Biological process	3	0	1.42253	356	24518	650	63681	0
GO:0050896	response to stimulus	Biological process	2	0.00267919	1.11614	344	30195	650	63681	0.0152721
GO:0009058	biosynthetic process	Biological process	3	3.6958e-06	1.20396	337	27423	650	63681	5.04158e-05
GO:0016020	membrane	Cellular component	2	0	1.46147	336	24335	684	72400	0
GO:1901576	organic substance biosynthetic process	Biological process	4	7.24773e-06	1.20136	329	26830	650	63681	9.24904e-05
GO:1901564	organonitrogen compound metabolic process	Biological process	4	0.000113522	1.19147	287	23599	650	63681	0.00105918
GO:0044249	cellular biosynthetic process	Biological process	4	0.0109616	1.11269	287	25270	650	63681	0.0499587
GO:0044711	single-organism biosynthetic process	Biological process	4	0	1.7764	251	13843	650	63681	0
GO:0071944	cell periphery	Cellular component	3	3.12983e-12	1.49606	241	17051	684	72400	4.42647e-11
GO:0071840	cellular component organization or biogenesis	Biological process	2	8.33809e-09	1.39387	230	16166	650	63681	1.83253e-07
GO:0006950	response to stress	Biological process	3	0.0130925	1.13564	223	19238	650	63681	0.0574211
GO:0044281	small molecule metabolic process	Biological process	4	3.10862e-15	1.63506	222	13302	650	63681	2.45954e-13
GO:0051179	localization	Biological process	2	7.01849e-06	1.29885	217	16368	650	63681	9.01466e-05
GO:0009536	plastid	Cellular component	6	7.00137e-10	1.4664	214	15447	684	72400	6.93136e-09
GO:0009628	response to abiotic stimulus	Biological process	3	1.16839e-11	1.52634	214	13736	650	63681	4.44437e-10
GO:0042221	response to chemical	Biological process	3	0.0274701	1.12	213	18632	650	63681	0.101562
GO:0009507	chloroplast	Cellular component	7	4.64692e-10	1.47907	211	15100	684	72400	5.11161e-09
GO:0044422	organelle part	Cellular component	2	3.66493e-10	1.48504	210	14968	684	72400	4.35394e-09
GO:0016043	cellular component organization	Biological process	3	1.41362e-08	1.4183	210	14506	650	63681	2.88262e-07
GO:0051234	establishment of localization	Biological process	3	2.85378e-06	1.32418	210	15537	650	63681	3.91998e-05
GO:0044446	intracellular organelle part	Cellular component	4	5.44798e-10	1.48044	209	14943	684	72400	5.57949e-09
GO:0006810	transport	Biological process	4	8.47116e-05	1.27126	198	15259	650	63681	0.000829503
GO:0044707	single-multicellular organism process	Biological process	3	0.0389559	1.12153	186	16248	650	63681	0.135184
GO:0007275	multicellular organism development	Biological process	4	0.0253284	1.13746	183	15762	650	63681	0.0961602
GO:0005576	extracellular region	Cellular component	2	0	2.18714	182	8808	684	72400	0
GO:0005886	plasma membrane	Cellular component	3	0.000176243	1.27932	179	14810	684	72400	0.000858102
GO:0043436	oxoacid metabolic process	Biological process	6	3.33067e-16	1.80825	178	9644	650	63681	9.41152e-14
GO:0006082	organic acid metabolic process	Biological process	5	7.77156e-16	1.80788	178	9646	650	63681	9.04244e-14
GO:1901362	organic cyclic compound biosynthetic process	Biological process	5	0.0409928	1.12478	176	15330	650	63681	0.137664
GO:0006793	phosphorus metabolic process	Biological process	4	3.11965e-05	1.32455	174	12870	650	63681	0.000337195
GO:0019752	carboxylic acid metabolic process	Biological process	7	1.22125e-15	1.83073	171	9151	650	63681	1.05027e-13
GO:0006796	phosphate-containing compound metabolic process	Biological process	5	0.000152442	1.29862	165	12448	650	63681	0.00134612
GO:0009605	response to external stimulus	Biological process	3	9.63705e-06	1.39147	152	10702	650	63681	0.000120646
GO:1901700	response to oxygen-containing compound	Biological process	4	0.0114776	1.18873	149	12280	650	63681	0.05148
GO:0005829	cytosol	Cellular component	5	2.00836e-08	1.55891	148	10049	684	72400	1.86401e-07
GO:1901566	organonitrogen compound biosynthetic process	Biological process	5	1.09712e-06	1.4659	144	9624	650	63681	1.60748e-05
GO:0006996	organelle organization	Biological process	4	6.91106e-07	1.48876	140	9213	650	63681	1.02782e-05
GO:0044283	small molecule biosynthetic process	Biological process	5	4.44089e-16	2.09603	139	6497	650	63681	1.09801e-13
GO:0005975	carbohydrate metabolic process	Biological process	4	4.42391e-12	1.80194	138	7503	650	63681	1.98875e-10
GO:0016787	hydrolase activity	Molecular function	3	0.030614	1.16275	133	11530	588	59271	0.146692
GO:0044435	plastid part	Cellular component	5	0	2.65769	133	5297	684	72400	0
GO:0044434	chloroplast part	Cellular component	6	0	2.69001	132	5194	684	72400	0
GO:0044425	membrane part	Cellular component	2	1.37264e-06	1.50511	129	9072	684	72400	9.70655e-06
GO:0051704	multi-organism process	Biological process	2	0.0229228	1.18273	127	10520	650	63681	0.0896073
GO:0044085	cellular component biogenesis	Biological process	3	2.83532e-09	1.70749	122	7000	650	63681	6.83935e-08
GO:0009056	catabolic process	Biological process	3	0.000318744	1.35459	120	8679	650	63681	0.0024437
GO:1901135	carbohydrate derivative metabolic process	Biological process	4	1.13255e-10	1.81795	119	6413	650	63681	3.73363e-09
GO:0032787	monocarboxylic acid metabolic process	Biological process	8	1.54437e-08	1.69582	114	6586	650	63681	3.08561e-07
GO:0046394	carboxylic acid biosynthetic process	Biological process	8	4.70735e-14	2.10892	112	5203	650	63681	3.10371e-12
GO:0016053	organic acid biosynthetic process	Biological process	6	4.70735e-14	2.10892	112	5203	650	63681	3.10371e-12
GO:0032991	macromolecular complex	Cellular component	2	2.79782e-05	1.46498	111	8020	684	72400	0.00016619
GO:0044723	single-organism carbohydrate metabolic process	Biological process	5	8.3753e-11	1.88504	110	5717	650	63681	2.80785e-09
GO:1901575	organic substance catabolic process	Biological process	4	4.81e-05	1.44655	110	7450	650	63681	0.000503396
GO:0055114	oxidation-reduction process	Biological process	4	5.1705e-07	1.61474	107	6492	650	63681	7.86711e-06
GO:0043207	response to external biotic stimulus	Biological process	4	0.000250638	1.39474	107	7516	650	63681	0.00201529
GO:0051707	response to other organism	Biological process	5	0.000250638	1.39474	107	7516	650	63681	0.00201529
GO:0009607	response to biotic stimulus	Biological process	3	0.000410821	1.37589	107	7619	650	63681	0.00306643
GO:0006952	defense response	Biological process	4	0.00213315	1.31052	107	7999	650	63681	0.0124099
GO:0044765	single-organism transport	Biological process	5	1.40149e-05	1.50375	106	6906	650	63681	0.00017112
GO:1902578	single-organism localization	Biological process	3	2.10788e-05	1.48909	106	6974	650	63681	0.000236897
GO:0019637	organophosphate metabolic process	Biological process	5	1.48106e-09	1.8309	104	5565	650	63681	3.70828e-08
GO:0071702	organic substance transport	Biological process	5	0.0281131	1.19912	104	8497	650	63681	0.103552
GO:0009314	response to radiation	Biological process	4	4.03299e-08	1.7289	102	5780	650	63681	7.7449e-07
GO:0016491	oxidoreductase activity	Molecular function	3	9.96518e-08	1.69625	101	6002	588	59271	2.29199e-05
GO:0012505	endomembrane system	Cellular component	3	0.00330648	1.30581	101	8187	684	72400	0.0129214
GO:0009416	response to light stimulus	Biological process	5	1.42626e-08	1.77805	100	5510	650	63681	2.87871e-07
GO:0006520	cellular amino acid metabolic process	Biological process	8	2.22045e-16	2.72218	98	3527	650	63681	1.46401e-13
GO:0006811	ion transport	Biological process	5	2.40589e-05	1.5139	98	6342	650	63681	0.000268861
GO:0016051	carbohydrate biosynthetic process	Biological process	6	1.88738e-14	2.3038	97	4125	650	63681	1.3333e-12
GO:0030312	external encapsulating structure	Cellular component	3	0	3.03427	95	3314	684	72400	0
GO:0005618	cell wall	Cellular component	4	0	3.01689	94	3298	684	72400	0
GO:0022607	cellular component assembly	Biological process	4	2.34405e-10	1.9941	92	4520	650	63681	7.35958e-09
GO:0099402	plant organ development	Biological process	4	0.0105302	1.26805	92	7108	650	63681	0.0482148
GO:0055044	symplast	Cellular component	2	6.33766e-08	1.78605	91	5393	684	72400	5.37796e-07
GO:0009506	plasmodesma	Cellular component	4	6.33766e-08	1.78605	91	5393	684	72400	5.37796e-07
GO:0005911	cell-cell junction	Cellular component	3	6.88724e-08	1.78274	91	5403	684	72400	5.52841e-07
GO:0030054	cell junction	Cellular component	2	6.88724e-08	1.78274	91	5403	684	72400	5.52841e-07
GO:0009117	nucleotide metabolic process	Biological process	8	1.10023e-13	2.32526	90	3792	650	63681	6.04516e-12
GO:0006753	nucleoside phosphate metabolic process	Biological process	7	1.38778e-13	2.31549	90	3808	650	63681	7.03853e-12
GO:0055086	nucleobase-containing small molecule metabolic process	Biological process	6	7.20535e-13	2.24761	90	3923	650	63681	3.39338e-11
GO:0031984	organelle subcompartment	Cellular component	5	0	2.7401	89	3438	684	72400	0
GO:0006091	generation of precursor metabolites and energy	Biological process	4	4.44089e-16	2.9678	89	2938	650	63681	1.09801e-13
GO:0006790	sulfur compound metabolic process	Biological process	4	3.88578e-15	2.48558	89	3508	650	63681	2.95618e-13
GO:0065008	regulation of biological quality	Biological process	3	5.37047e-05	1.51853	89	5742	650	63681	0.000556167
GO:0044248	cellular catabolic process	Biological process	4	0.00776569	1.28985	89	6760	650	63681	0.0384013
GO:0015979	photosynthesis	Biological process	4	7.77156e-16	5.38777	87	1582	650	63681	9.04244e-14
GO:0006629	lipid metabolic process	Biological process	4	0.0179302	1.24959	87	6821	650	63681	0.0749808
GO:0031224	intrinsic component of membrane	Cellular component	3	0.0133425	1.26888	86	7174	684	72400	0.0404358
GO:0048869	cellular developmental process	Biological process	4	0.0208479	1.24306	86	6778	650	63681	0.0838155
GO:0009579	thylakoid	Cellular component	4	0	4.443	85	2025	684	72400	0
GO:0051186	cofactor metabolic process	Biological process	4	2.2638e-10	2.06689	85	4029	650	63681	7.22225e-09
GO:0098542	defense response to other organism	Biological process	6	9.44249e-05	1.51135	85	5510	650	63681	0.000911086
GO:0051641	cellular localization	Biological process	3	0.0390682	1.21132	83	6713	650	63681	0.135336
GO:0016021	integral component of membrane	Cellular component	4	0.00413952	1.34426	81	6378	684	72400	0.015368
GO:1901605	alpha-amino acid metabolic process	Biological process	9	6.66134e-16	2.89516	81	2741	650	63681	9.41152e-14
GO:0006812	cation transport	Biological process	6	4.28106e-07	1.78372	80	4394	650	63681	6.66766e-06
GO:0044712	single-organism catabolic process	Biological process	4	0.000720085	1.44401	78	5292	650	63681	0.00501524
GO:0031975	envelope	Cellular component	3	1.13008e-08	1.98304	77	4110	684	72400	1.08269e-07
GO:0009888	tissue development	Biological process	4	0.0134921	1.28777	77	5858	650	63681	0.0586536
GO:0031976	plastid thylakoid	Cellular component	6	0	4.84313	76	1661	684	72400	0
GO:0009534	chloroplast thylakoid	Cellular component	7	0	4.84313	76	1661	684	72400	0
GO:0031967	organelle envelope	Cellular component	5	2.1569e-08	1.96302	76	4098	684	72400	1.94121e-07
GO:0031090	organelle membrane	Cellular component	3	2.89673e-05	1.62244	75	4893	684	72400	0.000168692
GO:0009266	response to temperature stimulus	Biological process	4	0.000351619	1.49406	75	4918	650	63681	0.00266476
GO:0005976	polysaccharide metabolic process	Biological process	5	2.6506e-09	2.08448	74	3478	650	63681	6.55361e-08
GO:0009532	plastid stroma	Cellular component	6	5.80647e-13	2.53757	73	3045	684	72400	9.07642e-12
GO:0034622	cellular macromolecular complex assembly	Biological process	6	8.0043e-11	2.27477	73	3144	650	63681	2.77763e-09
GO:0065003	macromolecular complex assembly	Biological process	5	5.67073e-10	2.17514	73	3288	650	63681	1.53653e-08
GO:0043933	macromolecular complex subunit organization	Biological process	4	2.65709e-09	2.09732	73	3410	650	63681	6.48854e-08
GO:0030154	cell differentiation	Biological process	5	0.00634782	1.34358	73	5323	650	63681	0.0321125
GO:0009570	chloroplast stroma	Cellular component	7	6.28053e-13	2.55397	72	2984	684	72400	9.32659e-12
GO:0070271	protein complex biogenesis	Biological process	4	6.98019e-12	2.41903	72	2916	650	63681	2.76136e-10
GO:0019693	ribose phosphate metabolic process	Biological process	6	8.23197e-11	2.28948	72	3081	650	63681	2.80739e-09
GO:0048046	apoplast	Cellular component	3	0	3.62878	71	2071	684	72400	0
GO:0005773	vacuole	Cellular component	6	0.00036457	1.51394	71	4964	684	72400	0.00164057
GO:0043234	protein complex	Cellular component	3	7.32798e-07	1.84864	70	4008	684	72400	5.44102e-06
GO:0006732	coenzyme metabolic process	Biological process	5	4.56023e-10	2.23168	70	3073	650	63681	1.28859e-08
GO:0006396	RNA processing	Biological process	8	3.22669e-07	1.8882	70	3632	650	63681	5.45504e-06
GO:0005215	transporter activity	Molecular function	2	0.00485281	1.37131	69	5072	588	59271	0.0540071
GO:0008652	cellular amino acid biosynthetic process	Biological process	9	5.55112e-16	3.04093	69	2223	650	63681	9.98191e-14
GO:0014070	response to organic cyclic compound	Biological process	5	0.000393052	1.51876	69	4451	650	63681	0.00294491
GO:0005794	Golgi apparatus	Cellular component	6	0.0150599	1.30653	68	5509	684	72400	0.0447279
GO:0044272	sulfur compound biosynthetic process	Biological process	5	1.09579e-13	2.73931	68	2432	650	63681	6.19278e-12
GO:0044436	thylakoid part	Cellular component	4	0	4.81454	67	1473	684	72400	0
GO:0043623	cellular protein complex assembly	Biological process	7	7.02356e-11	2.38692	67	2750	650	63681	2.48082e-09
GO:0006461	protein complex assembly	Biological process	6	5.783e-10	2.26816	67	2894	650	63681	1.54578e-08
GO:0071822	protein complex subunit organization	Biological process	5	3.0139e-09	2.17641	67	3016	650	63681	7.18253e-08
GO:0008610	lipid biosynthetic process	Biological process	5	0.00169527	1.44487	67	4543	650	63681	0.0102233
GO:0006970	response to osmotic stress	Biological process	4	0.00425316	1.38922	67	4725	650	63681	0.0231119
GO:0019684	photosynthesis, light reaction	Biological process	5	2.22045e-16	5.31312	66	1217	650	63681	1.46401e-13
GO:0006733	oxidoreduction coenzyme metabolic process	Biological process	6	1.07914e-13	2.79312	66	2315	650	63681	6.27804e-12
GO:0009617	response to bacterium	Biological process	6	2.72324e-07	1.94176	66	3330	650	63681	4.64359e-06
GO:1901565	organonitrogen compound catabolic process	Biological process	5	3.12573e-05	1.6795	66	3850	650	63681	0.000336016
GO:0034357	photosynthetic membrane	Cellular component	5	0	5.01466	65	1372	684	72400	0
GO:0071554	cell wall organization or biogenesis	Biological process	3	0.00782254	1.35838	65	4688	650	63681	0.0382049
GO:0042651	thylakoid membrane	Cellular component	6	0	5.01798	64	1350	684	72400	0
GO:0009526	plastid envelope	Cellular component	6	5.06867e-11	2.47236	64	2740	684	72400	6.8427e-10
GO:0098588	bounding membrane of organelle	Cellular component	4	9.97011e-06	1.76367	64	3841	684	72400	6.16901e-05
GO:0009651	response to salt stress	Biological process	5	0.00452773	1.39771	64	4486	650	63681	0.0242706
GO:0098805	whole membrane	Cellular component	3	4.37908e-06	1.82098	63	3662	684	72400	2.76721e-05
GO:0072330	monocarboxylic acid biosynthetic process	Biological process	9	4.93366e-07	1.9446	63	3174	650	63681	7.62405e-06
GO:0055035	plastid thylakoid membrane	Cellular component	7	3.33067e-16	5.10309	62	1286	684	72400	6.18255e-15
GO:0009535	chloroplast thylakoid membrane	Cellular component	8	0	5.07205	61	1273	684	72400	0
GO:0009941	chloroplast envelope	Cellular component	7	1.2259e-10	2.48431	61	2599	684	72400	1.58301e-09
GO:0000096	sulfur amino acid metabolic process	Biological process	9	7.77156e-16	3.59796	61	1661	650	63681	9.04244e-14
GO:0034660	ncRNA metabolic process	Biological process	8	9.99201e-16	3.34371	60	1758	650	63681	9.41152e-14
GO:1901607	alpha-amino acid biosynthetic process	Biological process	10	8.81517e-14	3.02632	59	1910	650	63681	5.44888e-12
GO:0090558	plant epidermis development	Biological process	5	1.85918e-05	1.77309	59	3260	650	63681	0.000217601
GO:0046496	nicotinamide nucleotide metabolic process	Biological process	10	5.10247e-12	2.7705	58	2051	650	63681	2.24282e-10
GO:0019362	pyridine nucleotide metabolic process	Biological process	9	5.40556e-12	2.76646	58	2054	650	63681	2.32439e-10
GO:0072524	pyridine-containing compound metabolic process	Biological process	5	8.22353e-12	2.73714	58	2076	650	63681	3.18944e-10
GO:0000271	polysaccharide biosynthetic process	Biological process	7	7.06274e-08	2.1354	58	2661	650	63681	1.31793e-06
GO:0009409	response to cold	Biological process	5	3.97198e-05	1.73558	58	3274	650	63681	0.000422396
GO:0044262	cellular carbohydrate metabolic process	Biological process	5	0.00019637	1.63379	58	3478	650	63681	0.0016117
GO:0009069	serine family amino acid metabolic process	Biological process	10	2.22045e-16	4.24341	57	1316	650	63681	1.46401e-13
GO:0042742	defense response to bacterium	Biological process	7	3.0611e-08	2.20725	57	2530	650	63681	6.05486e-07
GO:0090407	organophosphate biosynthetic process	Biological process	6	0.000152528	1.65855	57	3367	650	63681	0.00134089
GO:0010038	response to metal ion	Biological process	5	0.00113117	1.52619	57	3659	650	63681	0.00731197
GO:1905392	plant organ morphogenesis	Biological process	4	0.00906276	1.38124	57	4043	650	63681	0.042479
GO:0022613	ribonucleoprotein complex biogenesis	Biological process	4	2.12053e-14	3.25407	56	1686	650	63681	1.44634e-12
GO:0034470	ncRNA processing	Biological process	9	8.88178e-16	3.95333	55	1363	650	63681	8.78408e-14
GO:0006081	cellular aldehyde metabolic process	Biological process	4	5.73819e-12	2.85856	55	1885	650	63681	2.36461e-10
GO:1901615	organic hydroxy compound metabolic process	Biological process	4	0.00421308	1.45261	54	3642	650	63681	0.0229572
GO:0022857	transmembrane transporter activity	Molecular function	3	0.0294688	1.30527	53	4093	588	59271	0.143193
GO:0000097	sulfur amino acid biosynthetic process	Biological process	10	2.33147e-15	3.58842	53	1447	650	63681	1.92152e-13
GO:0009657	plastid organization	Biological process	5	1.05027e-13	3.25546	53	1595	650	63681	6.29526e-12
GO:0030001	metal ion transport	Biological process	7	0.000100903	1.72449	53	3011	650	63681	0.000959551
GO:0016817	hydrolase activity, acting on acid anhydrides	Molecular function	4	0.00364789	1.47362	52	3557	588	59271	0.0493537
GO:0022892	substrate-specific transporter activity	Molecular function	3	0.0266114	1.31766	52	3978	588	59271	0.138059
GO:0005774	vacuolar membrane	Cellular component	6	3.59955e-05	1.80996	52	3041	684	72400	0.000205589
GO:0044437	vacuolar part	Cellular component	5	4.36402e-05	1.79638	52	3064	684	72400	0.00024455
GO:0006364	rRNA processing	Biological process	10	6.66134e-16	4.61039	52	1105	650	63681	9.41152e-14
GO:0016072	rRNA metabolic process	Biological process	9	9.99201e-16	4.53246	52	1124	650	63681	9.41152e-14
GO:0042254	ribosome biogenesis	Biological process	5	1.38445e-13	3.2783	52	1554	650	63681	7.20642e-12
GO:0044264	cellular polysaccharide metabolic process	Biological process	6	5.72883e-05	1.77508	52	2870	650	63681	0.000590189
GO:0048827	phyllome development	Biological process	5	0.0470359	1.27013	52	4011	650	63681	0.156628
GO:0016462	pyrophosphatase activity	Molecular function	6	0.00376824	1.47768	51	3479	588	59271	0.0500017
GO:0016818	hydrolase activity, acting on acid anhydrides, in phosphorus-containing anhydrides	Molecular function	5	0.00489895	1.45757	51	3527	588	59271	0.0536552
GO:0019748	secondary metabolic process	Biological process	4	0.00133248	1.558	51	3207	650	63681	0.00842058
GO:1901137	carbohydrate derivative biosynthetic process	Biological process	5	0.0103873	1.40037	51	3568	650	63681	0.0476708
GO:0055085	transmembrane transport	Biological process	5	0.0368328	1.2951	51	3858	650	63681	0.128947
GO:0009070	serine family amino acid biosynthetic process	Biological process	11	5.55112e-16	4.57807	50	1070	650	63681	9.98191e-14
GO:0019344	cysteine biosynthetic process	Biological process	12	2.22045e-16	4.64272	49	1034	650	63681	1.46401e-13
GO:0006534	cysteine metabolic process	Biological process	11	6.66134e-16	4.55894	49	1053	650	63681	9.41152e-14
GO:0042592	homeostatic process	Biological process	4	9.60239e-06	1.94512	49	2468	650	63681	0.000120978
GO:0071555	cell wall organization	Biological process	5	0.00149038	1.56574	49	3066	650	63681	0.00918371
GO:0045229	external encapsulating structure organization	Biological process	4	0.0065181	1.44945	49	3312	650	63681	0.0328061
GO:0009057	macromolecule catabolic process	Biological process	5	0.0139269	1.38705	49	3461	650	63681	0.0602789
GO:0017111	nucleoside-triphosphatase activity	Molecular function	7	0.00630614	1.45693	48	3321	588	59271	0.061285
GO:0006073	cellular glucan metabolic process	Biological process	7	9.07552e-08	2.32227	48	2025	650	63681	1.6777e-06
GO:0044042	glucan metabolic process	Biological process	6	9.07552e-08	2.32227	48	2025	650	63681	1.6777e-06
GO:0006090	pyruvate metabolic process	Biological process	9	5.08051e-07	2.18725	48	2150	650	63681	7.79011e-06
GO:0046686	response to cadmium ion	Biological process	6	0.00164464	1.56649	48	3002	650	63681	0.00997882
GO:0048364	root development	Biological process	5	0.0111998	1.41092	48	3333	650	63681	0.0506936
GO:0022622	root system development	Biological process	5	0.011658	1.40754	48	3341	650	63681	0.0520531
GO:0022891	substrate-specific transmembrane transporter activity	Molecular function	4	0.0206824	1.36218	47	3478	588	59271	0.120939
GO:0009505	plant-type cell wall	Cellular component	5	4.27547e-13	3.50036	46	1391	684	72400	7.05452e-12
GO:0019682	glyceraldehyde-3-phosphate metabolic process	Biological process	6	3.40254e-11	3.06784	46	1469	650	63681	1.24634e-09
GO:0009751	response to salicylic acid	Biological process	6	0.000475015	1.68473	46	2675	650	63681	0.00347992
GO:0010207	photosystem II assembly	Biological process	8	5.55112e-16	7.38473	45	597	650	63681	9.98191e-14
GO:0009639	response to red or far red light	Biological process	6	5.51862e-07	2.24933	45	1960	650	63681	8.3327e-06
GO:1901617	organic hydroxy compound biosynthetic process	Biological process	5	0.00199768	1.57735	45	2795	650	63681	0.0117253
GO:0009259	ribonucleotide metabolic process	Biological process	9	0.000118752	1.82348	44	2364	650	63681	0.00110278
GO:0098796	membrane protein complex	Cellular component	4	2.96799e-08	2.5671	43	1773	684	72400	2.59263e-07
GO:0009743	response to carbohydrate	Biological process	5	1.61973e-05	2.00798	43	2098	650	63681	0.000193002
GO:0034637	cellular carbohydrate biosynthetic process	Biological process	7	0.000500426	1.71598	43	2455	650	63681	0.00363913
GO:0021700	developmental maturation	Biological process	4	0.00363186	1.54426	43	2728	650	63681	0.0201793
GO:0010817	regulation of hormone levels	Biological process	4	0.000433821	1.74133	42	2363	650	63681	0.00321385
GO:0010015	root morphogenesis	Biological process	5	0.000693363	1.70032	42	2420	650	63681	0.00486338
GO:0071407	cellular response to organic cyclic compound	Biological process	6	0.0100108	1.46069	42	2817	650	63681	0.0462648
GO:0009814	defense response, incompatible interaction	Biological process	7	0.0221094	1.38545	42	2970	650	63681	0.0874647
GO:0051188	cofactor biosynthetic process	Biological process	5	1.01443e-07	2.51679	41	1596	650	63681	1.84086e-06
GO:0032268	regulation of cellular protein metabolic process	Biological process	7	0.00057988	1.72914	41	2323	650	63681	0.00415581
GO:0051246	regulation of protein metabolic process	Biological process	6	0.000891607	1.69057	41	2376	650	63681	0.0059581
GO:0048878	chemical homeostasis	Biological process	5	4.1733e-07	2.41456	40	1623	650	63681	6.55142e-06
GO:0008219	cell death	Biological process	4	0.029411	1.36926	40	2862	650	63681	0.107732
GO:0033692	cellular polysaccharide biosynthetic process	Biological process	8	0.00132718	1.6795	39	2275	650	63681	0.00841401
GO:0006739	NADP metabolic process	Biological process	11	1.38223e-13	4.2596	38	874	650	63681	7.38931e-12
GO:0042743	hydrogen peroxide metabolic process	Biological process	5	2.56553e-05	2.07288	38	1796	650	63681	0.000283498
GO:0072593	reactive oxygen species metabolic process	Biological process	4	0.00024605	1.85495	38	2007	650	63681	0.00198648
GO:0090627	plant epidermal cell differentiation	Biological process	6	0.000253249	1.85218	38	2010	650	63681	0.00201987
GO:0048366	leaf development	Biological process	6	0.00103086	1.7172	38	2168	650	63681	0.00677424
GO:0070838	divalent metal ion transport	Biological process	8	1.08841e-08	2.91861	37	1242	650	63681	2.2903e-07
GO:0072511	divalent inorganic cation transport	Biological process	7	1.39351e-08	2.89068	37	1254	650	63681	2.87122e-07
GO:0019725	cellular homeostasis	Biological process	5	4.25846e-06	2.27839	37	1591	650	63681	5.69137e-05
GO:0010054	trichoblast differentiation	Biological process	8	0.000135082	1.93226	37	1876	650	63681	0.00122565
GO:0010053	root epidermal cell differentiation	Biological process	7	0.000281368	1.85989	37	1949	650	63681	0.00219979
GO:0008299	isoprenoid biosynthetic process	Biological process	7	0.000592038	1.78655	37	2029	650	63681	0.00422762
GO:0006720	isoprenoid metabolic process	Biological process	6	0.00197222	1.6674	37	2174	650	63681	0.0116103
GO:0044257	cellular protein catabolic process	Biological process	7	0.00398843	1.59688	37	2270	650	63681	0.0219142
GO:0030163	protein catabolic process	Biological process	6	0.00618621	1.55243	37	2335	650	63681	0.0313752
GO:0048764	trichoblast maturation	Biological process	6	9.88758e-05	1.98478	36	1777	650	63681	0.000949399
GO:0048765	root hair cell differentiation	Biological process	8	9.88758e-05	1.98478	36	1777	650	63681	0.000949399
GO:0048469	cell maturation	Biological process	5	0.000105586	1.9781	36	1783	650	63681	0.000994523
GO:0006163	purine nucleotide metabolic process	Biological process	9	0.000327949	1.86315	36	1893	650	63681	0.00249493
GO:0072521	purine-containing compound metabolic process	Biological process	5	0.000729528	1.78219	36	1979	650	63681	0.00506318
GO:0010016	shoot system morphogenesis	Biological process	4	0.00308986	1.63512	36	2157	650	63681	0.0173629
GO:0006098	pentose-phosphate shunt	Biological process	12	5.49261e-12	4.0436	35	848	650	63681	2.31157e-10
GO:0051156	glucose 6-phosphate metabolic process	Biological process	6	6.67488e-12	4.0152	35	854	650	63681	2.69447e-10
GO:0009411	response to UV	Biological process	6	1.252e-07	2.7388	35	1252	650	63681	2.23103e-06
GO:0009250	glucan biosynthetic process	Biological process	9	1.98008e-06	2.42674	35	1413	650	63681	2.79758e-05
GO:0042440	pigment metabolic process	Biological process	4	1.15238e-05	2.23532	35	1534	650	63681	0.000143359
GO:0019318	hexose metabolic process	Biological process	7	7.79908e-05	2.03259	35	1687	650	63681	0.000771329
GO:0009150	purine ribonucleotide metabolic process	Biological process	10	0.000162012	1.95606	35	1753	650	63681	0.00138129
GO:0005996	monosaccharide metabolic process	Biological process	6	0.00108935	1.75755	35	1951	650	63681	0.00708794
GO:0006631	fatty acid metabolic process	Biological process	9	0.00234027	1.67758	35	2044	650	63681	0.0135749
GO:0016052	carbohydrate catabolic process	Biological process	5	0.0115773	1.50724	35	2275	650	63681	0.0518096
GO:0007010	cytoskeleton organization	Biological process	5	0.0192923	1.45111	35	2363	650	63681	0.0795003
GO:0008289	lipid binding	Molecular function	3	1.61269e-09	3.33389	34	1028	588	59271	1.11275e-06
GO:0055080	cation homeostasis	Biological process	7	2.31869e-07	2.71476	34	1227	650	63681	4.02313e-06
GO:0050801	ion homeostasis	Biological process	6	2.38246e-06	2.44388	34	1363	650	63681	3.34221e-05
GO:0009126	purine nucleoside monophosphate metabolic process	Biological process	9	6.62107e-05	2.07539	34	1605	650	63681	0.000671614
GO:0009167	purine ribonucleoside monophosphate metabolic process	Biological process	10	6.62107e-05	2.07539	34	1605	650	63681	0.000671614
GO:0009161	ribonucleoside monophosphate metabolic process	Biological process	9	0.000156146	1.98274	34	1680	650	63681	0.00135464
GO:0009123	nucleoside monophosphate metabolic process	Biological process	8	0.000204626	1.95367	34	1705	650	63681	0.00167252
GO:0065009	regulation of molecular function	Biological process	3	0.0322947	1.40076	34	2378	650	63681	0.115513
GO:0009627	systemic acquired resistance	Biological process	8	0.0483154	1.35297	34	2462	650	63681	0.160349
GO:0016887	ATPase activity	Molecular function	8	0.00350393	1.66156	33	2002	588	59271	0.0483543
GO:0006006	glucose metabolic process	Biological process	8	6.25477e-05	2.10896	33	1533	650	63681	0.000641033
GO:0016311	dephosphorylation	Biological process	6	0.000136482	2.02191	33	1599	650	63681	0.0012271
GO:0009863	salicylic acid mediated signaling pathway	Biological process	6	0.00405004	1.64699	33	1963	650	63681	0.0221911
GO:0071446	cellular response to salicylic acid stimulus	Biological process	7	0.00456319	1.63367	33	1979	650	63681	0.0243288
GO:0051603	proteolysis involved in cellular protein catabolic process	Biological process	7	0.016504	1.48782	33	2173	650	63681	0.0696055
GO:0046906	tetrapyrrole binding	Molecular function	4	2.8252e-06	2.50243	32	1289	588	59271	0.000243674
GO:0010218	response to far red light	Biological process	7	4.44089e-16	6.41118	32	489	650	63681	1.09801e-13
GO:0006778	porphyrin-containing compound metabolic process	Biological process	6	3.34594e-09	3.39293	32	924	650	63681	7.87889e-08
GO:0033013	tetrapyrrole metabolic process	Biological process	5	3.90192e-09	3.37104	32	930	650	63681	9.07999e-08
GO:0046148	pigment biosynthetic process	Biological process	5	1.70572e-06	2.56762	32	1221	650	63681	2.44486e-05
GO:0046034	ATP metabolic process	Biological process	11	0.000152052	2.03576	32	1540	650	63681	0.00134869
GO:0009144	purine nucleoside triphosphate metabolic process	Biological process	9	0.000186701	2.01224	32	1558	650	63681	0.00155166
GO:0009205	purine ribonucleoside triphosphate metabolic process	Biological process	10	0.000186701	2.01224	32	1558	650	63681	0.00155166
GO:0009199	ribonucleoside triphosphate metabolic process	Biological process	9	0.000322905	1.94967	32	1608	650	63681	0.00246605
GO:0009141	nucleoside triphosphate metabolic process	Biological process	8	0.000358923	1.93762	32	1618	650	63681	0.00270973
GO:0009637	response to blue light	Biological process	6	9.22373e-13	4.85159	31	626	650	63681	4.24292e-11
GO:0015994	chlorophyll metabolic process	Biological process	7	4.86323e-10	3.77279	31	805	650	63681	1.33604e-08
GO:0055082	cellular chemical homeostasis	Biological process	6	2.33078e-07	2.87604	31	1056	650	63681	4.00895e-06
GO:0006644	phospholipid metabolic process	Biological process	6	0.00816673	1.59427	31	1905	650	63681	0.0395926
GO:0010114	response to red light	Biological process	7	1.62648e-13	5.37317	30	547	650	63681	8.04293e-12
GO:0030003	cellular cation homeostasis	Biological process	8	5.93967e-08	3.13339	30	938	650	63681	1.11892e-06
GO:0006873	cellular ion homeostasis	Biological process	7	1.91677e-07	2.96582	30	991	650	63681	3.38516e-06
GO:0034220	ion transmembrane transport	Biological process	6	0.00453168	1.68046	30	1749	650	63681	0.0242261
GO:0044724	single-organism carbohydrate catabolic process	Biological process	6	0.0102066	1.58102	30	1859	650	63681	0.0469502
GO:0090698	post-embryonic plant morphogenesis	Biological process	4	0.0393775	1.41033	30	2084	650	63681	0.136169
GO:0050790	regulation of catalytic activity	Biological process	4	0.0418849	1.40225	30	2096	650	63681	0.140421
GO:0005507	copper ion binding	Molecular function	7	5.84349e-06	2.54859	29	1147	588	59271	0.000366546
GO:0016829	lyase activity	Molecular function	3	0.000379566	2.00633	29	1457	588	59271	0.011387
GO:0044802	single-organism membrane organization	Biological process	5	1.191e-07	3.10508	29	915	650	63681	2.14163e-06
GO:0061024	membrane organization	Biological process	4	2.07826e-07	3.0225	29	940	650	63681	3.63788e-06
GO:0034285	response to disaccharide	Biological process	6	4.25764e-06	2.59466	29	1095	650	63681	5.76822e-05
GO:0009744	response to sucrose	Biological process	7	4.25764e-06	2.59466	29	1095	650	63681	5.76822e-05
GO:0019220	regulation of phosphate metabolic process	Biological process	7	1.41924e-05	2.43249	29	1168	650	63681	0.000172224
GO:0051174	regulation of phosphorus metabolic process	Biological process	6	1.48738e-05	2.42626	29	1171	650	63681	0.000178306
GO:0009165	nucleotide biosynthetic process	Biological process	9	0.000554095	1.96077	29	1449	650	63681	0.00398545
GO:1901293	nucleoside phosphate biosynthetic process	Biological process	8	0.000610187	1.94866	29	1458	650	63681	0.00432599
GO:0044550	secondary metabolite biosynthetic process	Biological process	5	0.00364608	1.72505	29	1647	650	63681	0.0202015
GO:0048037	cofactor binding	Molecular function	3	0.0170981	1.54147	28	1831	588	59271	0.115663
GO:0006779	porphyrin-containing compound biosynthetic process	Biological process	7	4.58619e-10	4.1313	28	664	650	63681	1.27767e-08
GO:0035304	regulation of protein dephosphorylation	Biological process	9	6.60816e-10	4.06397	28	675	650	63681	1.74279e-08
GO:0035303	regulation of dephosphorylation	Biological process	8	7.05598e-10	4.05197	28	677	650	63681	1.81256e-08
GO:0033014	tetrapyrrole biosynthetic process	Biological process	6	8.03859e-10	4.02817	28	681	650	63681	2.0385e-08
GO:0009668	plastid membrane organization	Biological process	6	7.56883e-09	3.63335	28	755	650	63681	1.70127e-07
GO:0010027	thylakoid membrane organization	Biological process	7	7.56883e-09	3.63335	28	755	650	63681	1.70127e-07
GO:0010310	regulation of hydrogen peroxide metabolic process	Biological process	7	2.46407e-06	2.72682	28	1006	650	63681	3.43235e-05
GO:0006470	protein dephosphorylation	Biological process	8	5.97359e-06	2.60017	28	1055	650	63681	7.82501e-05
GO:2000377	regulation of reactive oxygen species metabolic process	Biological process	6	1.27557e-05	2.4938	28	1100	650	63681	0.000157692
GO:0031399	regulation of protein modification process	Biological process	8	6.80528e-05	2.26522	28	1211	650	63681	0.00067984
GO:0090626	plant epidermis morphogenesis	Biological process	4	0.000503574	2.00086	28	1371	650	63681	0.00364861
GO:0009862	systemic acquired resistance, salicylic acid mediated signaling pathway	Biological process	7	0.000804106	1.94002	28	1414	650	63681	0.0053916
GO:0008654	phospholipid biosynthetic process	Biological process	7	0.00486741	1.70702	28	1607	650	63681	0.0254702
GO:0046395	carboxylic acid catabolic process	Biological process	8	0.0305502	1.46459	28	1873	650	63681	0.111082
GO:0016054	organic acid catabolic process	Biological process	6	0.0305502	1.46459	28	1873	650	63681	0.111082
GO:0015995	chlorophyll biosynthetic process	Biological process	8	4.97382e-11	4.72359	27	560	650	63681	1.78877e-09
GO:0043473	pigmentation	Biological process	3	2.64746e-10	4.37949	27	604	650	63681	8.18232e-09
GO:0043476	pigment accumulation	Biological process	4	2.64746e-10	4.37949	27	604	650	63681	8.18232e-09
GO:0043478	pigment accumulation in response to UV light	Biological process	7	2.64746e-10	4.37949	27	604	650	63681	8.18232e-09
GO:0043479	pigment accumulation in tissues in response to UV light	Biological process	8	2.64746e-10	4.37949	27	604	650	63681	8.18232e-09
GO:0043480	pigment accumulation in tissues	Biological process	5	2.64746e-10	4.37949	27	604	650	63681	8.18232e-09
GO:0043481	anthocyanin accumulation in tissues in response to UV light	Biological process	9	2.64746e-10	4.37949	27	604	650	63681	8.18232e-09
GO:0009658	chloroplast organization	Biological process	6	2.53369e-06	2.78443	27	950	650	63681	3.50464e-05
GO:0019319	hexose biosynthetic process	Biological process	8	7.27876e-06	2.62682	27	1007	650	63681	9.2291e-05
GO:0046364	monosaccharide biosynthetic process	Biological process	7	2.00901e-05	2.47911	27	1067	650	63681	0.000231037
GO:0004553	hydrolase activity, hydrolyzing O-glycosyl compounds	Molecular function	5	0.00198118	1.87068	26	1401	588	59271	0.0341754
GO:0016798	hydrolase activity, acting on glycosyl bonds	Molecular function	4	0.00455204	1.75541	26	1493	588	59271	0.0523484
GO:0042623	ATPase activity, coupled	Molecular function	9	0.00593677	1.71857	26	1525	588	59271	0.0585196
GO:0006094	gluconeogenesis	Biological process	9	1.42316e-05	2.58341	26	986	650	63681	0.000171647
GO:0005982	starch metabolic process	Biological process	8	4.82808e-05	2.40079	26	1061	650	63681	0.000502628
GO:0009072	aromatic amino acid family metabolic process	Biological process	9	0.000166606	2.22078	26	1147	650	63681	0.00140233
GO:0080147	root hair cell development	Biological process	6	0.000217358	2.18272	26	1167	650	63681	0.00176928
GO:0006096	glycolytic process	Biological process	13	0.000752028	2.00728	26	1269	650	63681	0.00520109
GO:0006757	ATP generation from ADP	Biological process	12	0.000752028	2.00728	26	1269	650	63681	0.00520109
GO:0009135	purine nucleoside diphosphate metabolic process	Biological process	9	0.000760561	2.0057	26	1270	650	63681	0.0052055
GO:0046031	ADP metabolic process	Biological process	11	0.000760561	2.0057	26	1270	650	63681	0.0052055
GO:0009179	purine ribonucleoside diphosphate metabolic process	Biological process	10	0.000760561	2.0057	26	1270	650	63681	0.0052055
GO:0009185	ribonucleoside diphosphate metabolic process	Biological process	9	0.000760561	2.0057	26	1270	650	63681	0.0052055
GO:0006165	nucleoside diphosphate phosphorylation	Biological process	10	0.000919091	1.97921	26	1287	650	63681	0.00612108
GO:0009132	nucleoside diphosphate metabolic process	Biological process	8	0.00111753	1.95191	26	1305	650	63681	0.00724744
GO:0046939	nucleotide phosphorylation	Biological process	9	0.00162793	1.89951	26	1341	650	63681	0.00990785
GO:1901657	glycosyl compound metabolic process	Biological process	5	0.00276391	1.82598	26	1395	650	63681	0.0157098
GO:0042537	benzene-containing compound metabolic process	Biological process	5	0.00409641	1.77138	26	1438	650	63681	0.0223832
GO:0007389	pattern specification process	Biological process	4	0.0241683	1.52256	26	1673	650	63681	0.0937351
GO:0009932	cell tip growth	Biological process	8	0.0350558	1.469	26	1734	650	63681	0.124266
GO:0009825	multidimensional cell growth	Biological process	5	1.07742e-08	3.92511	25	624	650	63681	2.29155e-07
GO:0006633	fatty acid biosynthetic process	Biological process	10	4.80782e-06	2.81849	25	869	650	63681	6.38247e-05
GO:0010876	lipid localization	Biological process	4	0.000104909	2.33264	25	1050	650	63681	0.000992867
GO:0048767	root hair elongation	Biological process	6	0.000140026	2.28904	25	1070	650	63681	0.00124762
GO:0015672	monovalent inorganic cation transport	Biological process	7	0.00203448	1.89572	25	1292	650	63681	0.0119059
GO:0009767	photosynthetic electron transport chain	Biological process	6	1.65423e-13	6.99791	24	336	650	63681	7.98066e-12
GO:0022900	electron transport chain	Biological process	5	6.95689e-10	4.68386	24	502	650	63681	1.81062e-08
GO:0009746	response to hexose	Biological process	7	4.3626e-05	2.52285	24	932	650	63681	0.000459001
GO:0019288	isopentenyl diphosphate biosynthetic process, methylerythritol 4-phosphate pathway	Biological process	10	6.45438e-05	2.45952	24	956	650	63681	0.000658081
GO:0034284	response to monosaccharide	Biological process	6	6.87934e-05	2.44927	24	960	650	63681	0.000683785
GO:0009240	isopentenyl diphosphate biosynthetic process	Biological process	8	8.84073e-05	2.40912	24	976	650	63681	0.000861426
GO:0046490	isopentenyl diphosphate metabolic process	Biological process	7	8.84073e-05	2.40912	24	976	650	63681	0.000861426
GO:0016705	oxidoreductase activity, acting on paired donors, with incorporation or reduction of molecular oxygen	Molecular function	4	0.0276341	1.54768	23	1498	588	59271	0.141241
GO:0009521	photosystem	Cellular component	5	1.53211e-14	8.30888	23	293	684	72400	2.67668e-13
GO:1901606	alpha-amino acid catabolic process	Biological process	10	2.09005e-05	2.71159	23	831	650	63681	0.000236235
GO:0009063	cellular amino acid catabolic process	Biological process	9	2.56022e-05	2.67616	23	842	650	63681	0.000284501
GO:0019757	glycosinolate metabolic process	Biological process	7	0.00132646	2.02455	23	1113	650	63681	0.00849103
GO:0019760	glucosinolate metabolic process	Biological process	8	0.00132646	2.02455	23	1113	650	63681	0.00849103
GO:0016143	S-glycoside metabolic process	Biological process	6	0.00132646	2.02455	23	1113	650	63681	0.00849103
GO:0018958	phenol-containing compound metabolic process	Biological process	5	0.00782129	1.74677	23	1290	650	63681	0.0382933
GO:0044445	cytosolic part	Cellular component	5	0.0326537	1.5391	22	1513	684	72400	0.0897975
GO:0006869	lipid transport	Biological process	6	7.04773e-07	3.4541	22	624	650	63681	1.04033e-05
GO:0080167	response to karrikin	Biological process	4	2.65691e-05	2.74218	22	786	650	63681	0.000291965
GO:0006818	hydrogen transport	Biological process	6	0.000154487	2.4272	22	888	650	63681	0.0013521
GO:0015992	proton transport	Biological process	8	0.000154487	2.4272	22	888	650	63681	0.0013521
GO:0051049	regulation of transport	Biological process	5	0.000703275	2.16837	22	994	650	63681	0.00491547
GO:0032879	regulation of localization	Biological process	4	0.00519026	1.83904	22	1172	650	63681	0.0268051
GO:0016114	terpenoid biosynthetic process	Biological process	8	0.00788365	1.77104	22	1217	650	63681	0.0384085
GO:0009696	salicylic acid metabolic process	Biological process	9	0.0088453	1.75232	22	1230	650	63681	0.0417566
GO:0006721	terpenoid metabolic process	Biological process	7	0.0250122	1.58249	22	1362	650	63681	0.0956947
GO:0009773	photosynthetic electron transport in photosystem I	Biological process	7	1.26565e-14	9.56924	21	215	650	63681	9.27209e-13
GO:0051640	organelle localization	Biological process	4	4.15518e-05	2.73589	21	752	650	63681	0.000439515
GO:0019252	starch biosynthetic process	Biological process	10	0.000125293	2.5275	21	814	650	63681	0.00114736
GO:0005984	disaccharide metabolic process	Biological process	7	0.000127407	2.5244	21	815	650	63681	0.00116134
GO:0010374	stomatal complex development	Biological process	6	0.000428055	2.3039	21	893	650	63681	0.00318305
GO:0009311	oligosaccharide metabolic process	Biological process	6	0.000459928	2.29108	21	898	650	63681	0.00339455
GO:0051606	detection of stimulus	Biological process	3	0.00103646	2.14758	21	958	650	63681	0.00678846
GO:0010256	endomembrane system organization	Biological process	4	0.00948385	1.76751	21	1164	650	63681	0.0443476
GO:0009902	chloroplast relocation	Biological process	7	7.30079e-09	4.94802	20	396	650	63681	1.67918e-07
GO:0051667	establishment of plastid localization	Biological process	6	7.30079e-09	4.94802	20	396	650	63681	1.67918e-07
GO:0051644	plastid localization	Biological process	5	8.63846e-09	4.89854	20	400	650	63681	1.87768e-07
GO:0019750	chloroplast localization	Biological process	6	8.63846e-09	4.89854	20	400	650	63681	1.87768e-07
GO:0051656	establishment of organelle localization	Biological process	5	3.72729e-08	4.48379	20	437	650	63681	7.22802e-07
GO:0010103	stomatal complex morphogenesis	Biological process	5	5.40047e-06	3.25484	20	602	650	63681	7.12142e-05
GO:0043269	regulation of ion transport	Biological process	6	0.000311012	2.42202	20	809	650	63681	0.0023937
GO:0051273	beta-glucan metabolic process	Biological process	8	0.00061969	2.29171	20	855	650	63681	0.00437767
GO:0007030	Golgi organization	Biological process	5	0.00508072	1.9079	20	1027	650	63681	0.026308
GO:0046189	phenol-containing compound biosynthetic process	Biological process	6	0.0248947	1.62472	20	1206	650	63681	0.0954299
GO:0042802	identical protein binding	Molecular function	4	0.0153527	1.73795	19	1102	588	59271	0.107004
GO:0020037	heme binding	Molecular function	5	0.0237248	1.65676	19	1156	588	59271	0.128898
GO:0043085	positive regulation of catalytic activity	Biological process	5	0.00046639	2.40808	19	773	650	63681	0.00342944
GO:0044093	positive regulation of molecular function	Biological process	4	0.000519623	2.38647	19	780	650	63681	0.00375115
GO:0042044	fluid transport	Biological process	6	0.00183337	2.13959	19	870	650	63681	0.0109891
GO:0006833	water transport	Biological process	7	0.00183337	2.13959	19	870	650	63681	0.0109891
GO:0006694	steroid biosynthetic process	Biological process	6	0.00895878	1.83937	19	1012	650	63681	0.0421916
GO:0006200	obsolete ATP catabolic process	Biological process	0	0.0197052	1.69222	19	1100	650	63681	0.0810332
GO:0008202	steroid metabolic process	Biological process	5	0.0239079	1.65609	19	1124	650	63681	0.0929074
GO:0009697	salicylic acid biosynthetic process	Biological process	10	0.0314503	1.60469	19	1160	650	63681	0.11352
GO:0015405	P-P-bond-hydrolysis-driven transmembrane transporter activity	Molecular function	6	0.0205492	1.71172	18	1060	588	59271	0.121188
GO:0015399	primary active transmembrane transporter activity	Molecular function	5	0.0219382	1.69889	18	1068	588	59271	0.122076
GO:0042335	cuticle development	Biological process	4	1.39384e-11	8.16423	18	216	650	63681	5.20192e-10
GO:0036293	response to decreased oxygen levels	Biological process	5	6.46432e-06	3.47825	18	507	650	63681	8.41212e-05
GO:0070482	response to oxygen levels	Biological process	4	6.81859e-06	3.46459	18	509	650	63681	8.81515e-05
GO:0030243	cellulose metabolic process	Biological process	9	0.00159967	2.221	18	794	650	63681	0.00976588
GO:0009750	response to fructose	Biological process	8	0.00188051	2.18793	18	806	650	63681	0.0111367
GO:0043900	regulation of multi-organism process	Biological process	4	0.00442486	2.0154	18	875	650	63681	0.0239791
GO:0009698	phenylpropanoid metabolic process	Biological process	5	0.0159891	1.76171	18	1001	650	63681	0.0677224
GO:0009644	response to high light intensity	Biological process	7	0.0220204	1.69892	18	1038	650	63681	0.0872874
GO:1901659	glycosyl compound biosynthetic process	Biological process	6	0.0251114	1.67313	18	1054	650	63681	0.0958887
GO:0016614	oxidoreductase activity, acting on CH-OH group of donors	Molecular function	4	0.00800983	1.93848	17	884	588	59271	0.0690848
GO:0004497	monooxygenase activity	Molecular function	4	0.0158852	1.79624	17	954	588	59271	0.108523
GO:0001666	response to hypoxia	Biological process	6	1.36517e-05	3.43403	17	485	650	63681	0.000167721
GO:0000023	maltose metabolic process	Biological process	8	0.000263802	2.69064	17	619	650	63681	0.0020872
GO:0019758	glycosinolate biosynthetic process	Biological process	8	0.0131454	1.83628	17	907	650	63681	0.0575257
GO:0019761	glucosinolate biosynthetic process	Biological process	9	0.0131454	1.83628	17	907	650	63681	0.0575257
GO:0016144	S-glycoside biosynthetic process	Biological process	7	0.0131454	1.83628	17	907	650	63681	0.0575257
GO:0009260	ribonucleotide biosynthetic process	Biological process	10	0.0207096	1.74216	17	956	650	63681	0.0837702
GO:0046390	ribose phosphate biosynthetic process	Biological process	7	0.0207096	1.74216	17	956	650	63681	0.0837702
GO:0000911	cytokinesis by cell plate formation	Biological process	6	0.0214494	1.7349	17	960	650	63681	0.0855381
GO:1902410	mitotic cytokinetic process	Biological process	5	0.0246115	1.70646	17	976	650	63681	0.0952672
GO:0032506	cytokinetic process	Biological process	4	0.0246115	1.70646	17	976	650	63681	0.0952672
GO:0043094	cellular metabolic compound salvage	Biological process	4	0.0276565	1.68233	17	990	650	63681	0.102061
GO:0000281	mitotic cytokinesis	Biological process	6	0.0317229	1.65393	17	1007	650	63681	0.11388
GO:0061640	cytoskeleton-dependent cytokinesis	Biological process	5	0.0337827	1.64089	17	1015	650	63681	0.1204
GO:0010498	proteasomal protein catabolic process	Biological process	8	0.0379072	1.61699	17	1030	650	63681	0.132008
GO:0016616	oxidoreductase activity, acting on the CH-OH group of donors, NAD or NADP as acceptor	Molecular function	5	0.00435336	2.12213	16	760	588	59271	0.0509121
GO:0009595	detection of biotic stimulus	Biological process	4	0.00191045	2.31199	16	678	650	63681	0.0112802
GO:0009630	gravitropism	Biological process	5	0.0199487	1.78534	16	878	650	63681	0.0818641
GO:0009853	photorespiration	Biological process	5	0.0222679	1.76127	16	890	650	63681	0.087916
GO:0009629	response to gravity	Biological process	4	0.0282269	1.70941	16	917	650	63681	0.103779
GO:0009606	tropism	Biological process	4	0.0314862	1.68552	16	930	650	63681	0.113442
GO:0043492	ATPase activity, coupled to movement of substances	Molecular function	10	0.0280047	1.74598	15	866	588	59271	0.142083
GO:0042626	ATPase activity, coupled to transmembrane movement of substances	Molecular function	11	0.0280047	1.74598	15	866	588	59271	0.142083
GO:0016820	hydrolase activity, acting on acid anhydrides, catalyzing transmembrane movement of substances	Molecular function	5	0.0294941	1.73396	15	872	588	59271	0.142314
GO:0000325	plant-type vacuole	Cellular component	7	0.000863804	2.59431	15	612	684	72400	0.00377279
GO:0009749	response to glucose	Biological process	8	0.000163922	3.04257	15	483	650	63681	0.00139158
GO:0009108	coenzyme biosynthetic process	Biological process	6	0.0048307	2.16112	15	680	650	63681	0.0253452
GO:0016126	sterol biosynthetic process	Biological process	7	0.00557144	2.12672	15	691	650	63681	0.0284763
GO:0016125	sterol metabolic process	Biological process	6	0.00732787	2.0611	15	713	650	63681	0.0365101
GO:0009699	phenylpropanoid biosynthetic process	Biological process	6	0.007783	2.04674	15	718	650	63681	0.038391
GO:0032535	regulation of cellular component size	Biological process	5	0.0370909	1.68142	15	874	650	63681	0.129622
GO:0090066	regulation of anatomical structure size	Biological process	4	0.0370909	1.68142	15	874	650	63681	0.129622
GO:0016830	carbon-carbon lyase activity	Molecular function	4	0.000117161	3.29723	14	428	588	59271	0.00449117
GO:0046527	glucosyltransferase activity	Molecular function	6	0.0126366	1.98483	14	711	588	59271	0.0937556
GO:0009522	photosystem I	Cellular component	6	3.37354e-10	9.56046	14	155	684	72400	4.17476e-09
GO:0010287	plastoglobule	Cellular component	7	2.80594e-07	5.63449	14	263	684	72400	2.13683e-06
GO:0000038	very long-chain fatty acid metabolic process	Biological process	10	3.77784e-07	5.48636	14	250	650	63681	5.97805e-06
GO:0033559	unsaturated fatty acid metabolic process	Biological process	10	1.90796e-05	3.90767	14	351	650	63681	0.000221996
GO:0006636	unsaturated fatty acid biosynthetic process	Biological process	11	1.90796e-05	3.90767	14	351	650	63681	0.000221996
GO:0009926	auxin polar transport	Biological process	8	0.00105634	2.64276	14	519	650	63681	0.00689584
GO:0060918	auxin transport	Biological process	7	0.00169275	2.51207	14	546	650	63681	0.0102393
GO:0009914	hormone transport	Biological process	6	0.00209764	2.45365	14	559	650	63681	0.0122393
GO:0051274	beta-glucan biosynthetic process	Biological process	10	0.00238443	2.41903	14	567	650	63681	0.0137105
GO:0006816	calcium ion transport	Biological process	9	0.010768	2.02598	14	677	650	63681	0.0491896
GO:0042180	cellular ketone metabolic process	Biological process	5	0.0270848	1.79528	14	764	650	63681	0.100325
GO:0019842	vitamin binding	Molecular function	4	0.00240354	2.51519	13	521	588	59271	0.0394867
GO:0009684	indoleacetic acid biosynthetic process	Biological process	10	0.00767139	2.1846	13	583	650	63681	0.0380301
GO:0009683	indoleacetic acid metabolic process	Biological process	9	0.00798683	2.17341	13	586	650	63681	0.0388156
GO:0009741	response to brassinosteroid	Biological process	6	0.0114492	2.0743	13	614	650	63681	0.0514693
GO:0009851	auxin biosynthetic process	Biological process	7	0.0186959	1.94149	13	656	650	63681	0.0775273
GO:0042435	indole-containing compound biosynthetic process	Biological process	6	0.0402357	1.73754	13	733	650	63681	0.136278
GO:0009850	auxin metabolic process	Biological process	6	0.0471085	1.6959	13	751	650	63681	0.156606
GO:0016168	chlorophyll binding	Molecular function	5	4.72614e-09	9.75494	12	124	588	59271	1.63052e-06
GO:0035251	UDP-glucosyltransferase activity	Molecular function	7	0.00755424	2.27371	12	532	588	59271	0.069499
GO:0008135	translation factor activity, RNA binding	Molecular function	6	0.0190126	1.99936	12	605	588	59271	0.119261
GO:0098807	chloroplast thylakoid membrane protein complex	Cellular component	7	5.03395e-10	11.8708	12	107	684	72400	5.33958e-09
GO:0008361	regulation of cell size	Biological process	6	0.000135712	3.66246	12	321	650	63681	0.00122575
GO:0010155	regulation of proton transport	Biological process	7	0.00026973	3.39783	12	346	650	63681	0.0021256
GO:0016109	tetraterpenoid biosynthetic process	Biological process	9	0.00596667	2.34661	12	501	650	63681	0.0304177
GO:0016117	carotenoid biosynthetic process	Biological process	10	0.00596667	2.34661	12	501	650	63681	0.0304177
GO:0030244	cellulose biosynthetic process	Biological process	11	0.00643431	2.32342	12	506	650	63681	0.032467
GO:0016108	tetraterpenoid metabolic process	Biological process	8	0.0077864	2.26522	12	519	650	63681	0.0383122
GO:0016116	carotenoid metabolic process	Biological process	9	0.0077864	2.26522	12	519	650	63681	0.0383122
GO:0010224	response to UV-B	Biological process	7	0.00860144	2.23507	12	526	650	63681	0.0413957
GO:0098656	anion transmembrane transport	Biological process	7	0.0179602	2.01655	12	583	650	63681	0.0749478
GO:0051093	negative regulation of developmental process	Biological process	5	0.0208888	1.97257	12	596	650	63681	0.0838094
GO:0006888	ER to Golgi vesicle-mediated transport	Biological process	7	0.0226055	1.94967	12	603	650	63681	0.089071
GO:0016903	oxidoreductase activity, acting on the aldehyde or oxo group of donors	Molecular function	4	0.000337436	3.54253	11	313	588	59271	0.0105832
GO:0004601	peroxidase activity	Molecular function	5	0.00425665	2.57265	11	431	588	59271	0.0506395
GO:0016684	oxidoreductase activity, acting on peroxide as acceptor	Molecular function	4	0.00479145	2.53153	11	438	588	59271	0.0541984
GO:0003924	GTPase activity	Molecular function	8	0.0132193	2.19133	11	506	588	59271	0.0950138
GO:0016209	antioxidant activity	Molecular function	2	0.0184278	2.08423	11	532	588	59271	0.117733
GO:0016835	carbon-oxygen lyase activity	Molecular function	4	0.0460616	1.7971	11	617	588	59271	0.196188
GO:0009523	photosystem II	Cellular component	6	7.41385e-07	6.88951	11	169	684	72400	5.37052e-06
GO:0031977	thylakoid lumen	Cellular component	5	8.55737e-05	4.15831	11	280	684	72400	0.000445884
GO:0009705	plant-type vacuole membrane	Cellular component	7	0.00223417	2.80561	11	415	684	72400	0.00908971
GO:0031461	cullin-RING ubiquitin ligase complex	Cellular component	6	0.0309957	1.92133	11	606	684	72400	0.0860347
GO:0006546	glycine catabolic process	Biological process	12	0.000106404	4.05142	11	266	650	63681	0.000997474
GO:0009071	serine family amino acid catabolic process	Biological process	11	0.000137918	3.93313	11	274	650	63681	0.00123439
GO:0006544	glycine metabolic process	Biological process	11	0.000260582	3.65315	11	295	650	63681	0.00207001
GO:1900140	regulation of seedling development	Biological process	7	0.00319752	2.67414	11	403	650	63681	0.0178664
GO:0006766	vitamin metabolic process	Biological process	5	0.00384026	2.60939	11	413	650	63681	0.021218
GO:0006184	obsolete GTP catabolic process	Biological process	0	0.00543369	2.48886	11	433	650	63681	0.0278442
GO:0006164	purine nucleotide biosynthetic process	Biological process	10	0.00750836	2.37898	11	453	650	63681	0.0373154
GO:0072522	purine-containing compound biosynthetic process	Biological process	6	0.015807	2.13402	11	505	650	63681	0.0679699
GO:0030170	pyridoxal phosphate binding	Molecular function	6	0.00781597	2.48891	10	405	588	59271	0.0709608
GO:0070279	vitamin B6 binding	Molecular function	5	0.00781597	2.48891	10	405	588	59271	0.0709608
GO:0070035	purine NTP-dependent helicase activity	Molecular function	9	0.00794462	2.48278	10	406	588	59271	0.0702794
GO:0008026	ATP-dependent helicase activity	Molecular function	10	0.00794462	2.48278	10	406	588	59271	0.0702794
GO:0022838	substrate-specific channel activity	Molecular function	6	0.0223003	2.10881	10	478	588	59271	0.123098
GO:0022803	passive transmembrane transporter activity	Molecular function	4	0.0237357	2.08698	10	483	588	59271	0.12795
GO:0015267	channel activity	Molecular function	5	0.0237357	2.08698	10	483	588	59271	0.12795
GO:0042803	protein homodimerization activity	Molecular function	5	0.0432499	1.88062	10	536	588	59271	0.186515
GO:0010319	stromule	Cellular component	6	0.00014387	4.26806	10	248	684	72400	0.000712156
GO:0080008	Cul4-RING E3 ubiquitin ligase complex	Cellular component	7	0.00982776	2.40564	10	440	684	72400	0.0313854
GO:0031163	metallo-sulfur cluster assembly	Biological process	5	0.0117585	2.3382	10	419	650	63681	0.0523834
GO:0016226	iron-sulfur cluster assembly	Biological process	6	0.0117585	2.3382	10	419	650	63681	0.0523834
GO:0043090	amino acid import	Biological process	10	0.0186494	2.1723	10	451	650	63681	0.0774969
GO:0005372	water transmembrane transporter activity	Molecular function	5	1.60729e-05	6.25662	9	145	588	59271	0.000853098
GO:0015250	water channel activity	Molecular function	7	1.60729e-05	6.25662	9	145	588	59271	0.000853098
GO:0051082	unfolded protein binding	Molecular function	4	0.00340103	3.01398	9	301	588	59271	0.047892
GO:0005342	organic acid transmembrane transporter activity	Molecular function	5	0.0173408	2.31431	9	392	588	59271	0.116167
GO:0046943	carboxylic acid transmembrane transporter activity	Molecular function	8	0.0173408	2.31431	9	392	588	59271	0.116167
GO:0044433	cytoplasmic vesicle part	Cellular component	5	0.00341843	3.01466	9	316	684	72400	0.0131854
GO:0019253	reductive pentose-phosphate cycle	Biological process	8	3.28261e-08	12.9667	9	68	650	63681	6.42871e-07
GO:0019685	photosynthesis, dark reaction	Biological process	7	4.2542e-08	12.5962	9	70	650	63681	8.09116e-07
GO:0015977	carbon fixation	Biological process	4	5.6001e-07	9.38018	9	94	650	63681	8.39166e-06
GO:0009106	lipoate metabolic process	Biological process	10	0.000365959	4.15914	9	212	650	63681	0.00275235
GO:0015748	organophosphate ester transport	Biological process	6	0.0219491	2.221	9	397	650	63681	0.0871793
GO:0048581	negative regulation of post-embryonic development	Biological process	7	0.0362101	2.02698	9	435	650	63681	0.127444
GO:0016620	oxidoreductase activity, acting on the aldehyde or oxo group of donors, NAD or NADP as acceptor	Molecular function	5	0.00161981	3.69912	8	218	588	59271	0.0310464
GO:0016831	carboxy-lyase activity	Molecular function	5	0.00541946	3.03161	8	266	588	59271	0.0558123
GO:0016836	hydro-lyase activity	Molecular function	5	0.0284616	2.24002	8	360	588	59271	0.142308
GO:0030076	light-harvesting complex	Cellular component	4	1.69173e-06	9.84632	8	86	684	72400	1.16847e-05
GO:0012506	vesicle membrane	Cellular component	4	0.00106502	3.95693	8	214	684	72400	0.00451872
GO:0048475	coated membrane	Cellular component	3	0.00529992	3.04598	8	278	684	72400	0.0189648
GO:0030117	membrane coat	Cellular component	5	0.00529992	3.04598	8	278	684	72400	0.0189648
GO:0031969	chloroplast membrane	Cellular component	7	0.0263112	2.2763	8	372	684	72400	0.0737211
GO:0042170	plastid membrane	Cellular component	6	0.0495497	2.00185	8	423	684	72400	0.124714
GO:0015696	ammonium transport	Biological process	7	0.00123662	3.86092	8	203	650	63681	0.00796753
GO:1901136	carbohydrate derivative catabolic process	Biological process	5	0.007127	2.89213	8	271	650	63681	0.035599
GO:0009152	purine ribonucleotide biosynthetic process	Biological process	11	0.0158989	2.50405	8	313	650	63681	0.067485
GO:0009804	coumarin metabolic process	Biological process	6	0.0161741	2.49607	8	314	650	63681	0.0683599
GO:0009073	aromatic amino acid family biosynthetic process	Biological process	10	0.040204	2.09004	8	375	650	63681	0.138062
GO:0003746	translation elongation factor activity	Molecular function	7	0.000996613	4.52312	7	156	588	59271	0.0229221
GO:0015926	glucosidase activity	Molecular function	6	0.00174742	4.10237	7	172	588	59271	0.0325871
GO:0008483	transaminase activity	Molecular function	5	0.0179603	2.64272	7	267	588	59271	0.118025
GO:0016769	transferase activity, transferring nitrogenous groups	Molecular function	4	0.0179603	2.64272	7	267	588	59271	0.118025
GO:0030126	COPI vesicle coat	Cellular component	7	2.82138e-06	11.399	7	65	684	72400	1.90443e-05
GO:0030137	COPI-coated vesicle	Cellular component	8	2.82138e-06	11.399	7	65	684	72400	1.90443e-05
GO:0030663	COPI-coated vesicle membrane	Cellular component	8	2.82138e-06	11.399	7	65	684	72400	1.90443e-05
GO:0030660	Golgi-associated vesicle membrane	Cellular component	6	0.000303774	5.52937	7	134	684	72400	0.00138802
GO:0030120	vesicle coat	Cellular component	6	0.00201408	4.00506	7	185	684	72400	0.00830807
GO:0030662	coated vesicle membrane	Cellular component	7	0.0024801	3.85904	7	192	684	72400	0.00995392
GO:0005798	Golgi-associated vesicle	Cellular component	7	0.00356094	3.61432	7	205	684	72400	0.013559
GO:0030659	cytoplasmic vesicle membrane	Cellular component	6	0.00356094	3.61432	7	205	684	72400	0.013559
GO:0031978	plastid thylakoid lumen	Cellular component	6	0.00484648	3.41445	7	217	684	72400	0.0177704
GO:0009543	chloroplast thylakoid lumen	Cellular component	7	0.00484648	3.41445	7	217	684	72400	0.0177704
GO:0030135	coated vesicle	Cellular component	7	0.0117056	2.88302	7	257	684	72400	0.0362141
GO:0010109	regulation of photosynthesis	Biological process	6	0.000189128	5.96344	7	115	650	63681	0.00155873
GO:0009765	photosynthesis, light harvesting	Biological process	5	0.000623335	4.89854	7	140	650	63681	0.00438774
GO:1905039	carboxylic acid transmembrane transport	Biological process	9	0.00140961	4.2596	7	161	650	63681	0.00887963
GO:1903825	organic acid transmembrane transport	Biological process	7	0.00140961	4.2596	7	161	650	63681	0.00887963
GO:0009225	nucleotide-sugar metabolic process	Biological process	6	0.00256699	3.83126	7	179	650	63681	0.0146749
GO:0009127	purine nucleoside monophosphate biosynthetic process	Biological process	10	0.0127195	2.83387	7	242	650	63681	0.0564108
GO:0009168	purine ribonucleoside monophosphate biosynthetic process	Biological process	11	0.0127195	2.83387	7	242	650	63681	0.0564108
GO:0042793	transcription from plastid promoter	Biological process	11	0.0127195	2.83387	7	242	650	63681	0.0564108
GO:0071248	cellular response to metal ion	Biological process	6	0.015867	2.71065	7	253	650	63681	0.0674943
GO:0010101	post-embryonic root morphogenesis	Biological process	6	0.0202552	2.57818	7	266	650	63681	0.0827784
GO:0010102	lateral root morphogenesis	Biological process	7	0.0202552	2.57818	7	266	650	63681	0.0827784
GO:0071241	cellular response to inorganic substance	Biological process	5	0.0294923	2.38123	7	288	650	63681	0.10783
GO:0052543	callose deposition in cell wall	Biological process	8	0.0304522	2.36481	7	290	650	63681	0.110929
GO:0009156	ribonucleoside monophosphate biosynthetic process	Biological process	10	0.0400447	2.22661	7	308	650	63681	0.137994
GO:0052386	cell wall thickening	Biological process	7	0.0400447	2.22661	7	308	650	63681	0.137994
GO:0004568	chitinase activity	Molecular function	6	0.000112829	7.95798	6	76	588	59271	0.00457953
GO:0016832	aldehyde-lyase activity	Molecular function	5	0.000139908	7.65577	6	79	588	59271	0.00508086
GO:0008422	beta-glucosidase activity	Molecular function	7	0.00154636	4.87747	6	124	588	59271	0.0304853
GO:0044769	ATPase activity, coupled to transmembrane movement of ions, rotational mechanism	Molecular function	13	0.00386691	4.0591	6	149	588	59271	0.0503427
GO:0009654	photosystem II oxygen evolving complex	Cellular component	5	8.0581e-05	8.46784	6	75	684	72400	0.000427367
GO:0016469	proton-transporting two-sector ATPase complex	Cellular component	5	0.0203662	2.83521	6	224	684	72400	0.0598888
GO:0044421	extracellular region part	Cellular component	2	0.0236887	2.73745	6	232	684	72400	0.0676496
GO:0050821	protein stabilization	Biological process	5	1.16555e-06	17.289	6	34	650	63681	1.6952e-05
GO:0031647	regulation of protein stability	Biological process	4	1.65905e-06	16.3285	6	36	650	63681	2.39532e-05
GO:0042548	regulation of photosynthesis, light reaction	Biological process	7	0.000122489	7.83766	6	75	650	63681	0.0011269
GO:0043467	regulation of generation of precursor metabolites and energy	Biological process	6	0.000244145	6.91558	6	85	650	63681	0.00197917
GO:0006040	amino sugar metabolic process	Biological process	5	0.000756945	5.59833	6	105	650	63681	0.00519874
GO:0010025	wax biosynthetic process	Biological process	6	0.00157697	4.85805	6	121	650	63681	0.0096571
GO:1901570	fatty acid derivative biosynthetic process	Biological process	5	0.00235511	4.48721	6	131	650	63681	0.0136211
GO:0010166	wax metabolic process	Biological process	5	0.00235511	4.48721	6	131	650	63681	0.0136211
GO:1901568	fatty acid derivative metabolic process	Biological process	4	0.00443961	3.94513	6	149	650	63681	0.0238629
GO:0019742	pentacyclic triterpenoid metabolic process	Biological process	9	0.00853609	3.43757	6	171	650	63681	0.0412821
GO:0019745	pentacyclic triterpenoid biosynthetic process	Biological process	10	0.00853609	3.43757	6	171	650	63681	0.0412821
GO:0016104	triterpenoid biosynthetic process	Biological process	9	0.00950105	3.359	6	175	650	63681	0.0443233
GO:0006722	triterpenoid metabolic process	Biological process	8	0.0144776	3.06159	6	192	650	63681	0.0625254
GO:0002213	defense response to insect	Biological process	5	0.0169731	2.95389	6	199	650	63681	0.0714314
GO:0009556	microsporogenesis	Biological process	7	0.02017	2.83973	6	207	650	63681	0.0826011
GO:0009269	response to desiccation	Biological process	7	0.0232834	2.74684	6	214	650	63681	0.0908376
GO:0010565	regulation of cellular ketone metabolic process	Biological process	6	0.0251997	2.69644	6	218	650	63681	0.0960406
GO:0006473	protein acetylation	Biological process	9	0.0251997	2.69644	6	218	650	63681	0.0960406
GO:0034293	sexual sporulation	Biological process	5	0.026704	2.65984	6	221	650	63681	0.100803
GO:0043934	sporulation	Biological process	4	0.026704	2.65984	6	221	650	63681	0.100803
GO:0048236	plant-type sporogenesis	Biological process	6	0.026704	2.65984	6	221	650	63681	0.100803
GO:0016984	ribulose-bisphosphate carboxylase activity	Molecular function	6	2.74216e-06	21.9133	5	23	588	59271	0.000270298
GO:0004332	fructose-bisphosphate aldolase activity	Molecular function	6	3.4355e-06	21.0002	5	24	588	59271	0.000263388
GO:0008519	ammonium transmembrane transporter activity	Molecular function	7	9.2556e-05	10.9566	5	46	588	59271	0.00399148
GO:0005199	structural constituent of cell wall	Molecular function	3	0.000413286	8.00008	5	63	588	59271	0.011882
GO:0046933	proton-transporting ATP synthase activity, rotational mechanism	Molecular function	14	0.00388281	4.8462	5	104	588	59271	0.0496137
GO:0042807	central vacuole	Cellular component	8	1.4142e-05	16.0376	5	33	684	72400	8.57179e-05
GO:0044462	external encapsulating structure part	Cellular component	3	7.38139e-05	11.5052	5	46	684	72400	0.000398595
GO:0009706	chloroplast inner membrane	Cellular component	8	0.0364486	2.75646	5	192	684	72400	0.099314
GO:0009528	plastid inner membrane	Cellular component	7	0.0407123	2.67293	5	198	684	72400	0.107005
GO:0080158	chloroplast ribulose bisphosphate carboxylase complex biogenesis	Biological process	5	1.93923e-06	23.3264	5	21	650	63681	2.75957e-05
GO:0072488	ammonium transmembrane transport	Biological process	8	3.16589e-05	13.6071	5	36	650	63681	0.000338494
GO:0034329	cell junction assembly	Biological process	5	0.000158185	9.79708	5	50	650	63681	0.00136039
GO:0015695	organic cation transport	Biological process	7	0.000158185	9.79708	5	50	650	63681	0.00136039
GO:0045216	cell-cell junction organization	Biological process	5	0.000294799	8.59393	5	57	650	63681	0.00229572
GO:0034330	cell junction organization	Biological process	4	0.000294799	8.59393	5	57	650	63681	0.00229572
GO:0006949	syncytium formation	Biological process	4	0.00493857	4.57807	5	107	650	63681	0.0257744
GO:0015718	monocarboxylic acid transport	Biological process	9	0.0100169	3.85712	5	127	650	63681	0.0461852
GO:0015985	energy coupled proton transport, down electrochemical gradient	Biological process	10	0.0110039	3.76811	5	130	650	63681	0.0500362
GO:0015986	ATP synthesis coupled proton transport	Biological process	13	0.0110039	3.76811	5	130	650	63681	0.0500362
GO:0005985	sucrose metabolic process	Biological process	8	0.0127928	3.62855	5	135	650	63681	0.0562313
GO:0010928	regulation of auxin mediated signaling pathway	Biological process	7	0.0135602	3.57558	5	137	650	63681	0.0588203
GO:0071732	cellular response to nitric oxide	Biological process	7	0.0203174	3.22272	5	152	650	63681	0.0825212
GO:0090332	stomatal closure	Biological process	5	0.0213578	3.18087	5	154	650	63681	0.085345
GO:0071731	response to nitric oxide	Biological process	6	0.0246849	3.06159	5	160	650	63681	0.0951788
GO:1902170	cellular response to reactive nitrogen species	Biological process	6	0.0309356	2.88149	5	170	650	63681	0.112071
GO:1901658	glycosyl compound catabolic process	Biological process	6	0.0316102	2.86464	5	171	650	63681	0.113682
GO:0006754	ATP biosynthetic process	Biological process	12	0.0322941	2.84799	5	172	650	63681	0.11572
GO:0015802	basic amino acid transport	Biological process	10	0.0420269	2.64786	5	185	650	63681	0.140659
GO:0009145	purine nucleoside triphosphate biosynthetic process	Biological process	10	0.0461926	2.57818	5	190	650	63681	0.154339
GO:0009206	purine ribonucleoside triphosphate biosynthetic process	Biological process	11	0.0461926	2.57818	5	190	650	63681	0.154339
