# Supplementary material for: Overdominance at the Gene Expression Level Plays a Critical Role in the Hybrid Root Growth of Brassica napus
Source: Int J Mol Sci. 2021 Aug 26;22(17):9246. doi: 10.3390/ijms22179246 (PMC8431428; doi:10.3390/ijms22179246)
Supplement: Supplementary file 1 [file ijms-22-09246-s001.zip › ijms-1346590-supplementary/Supplementary Materials/Supplementary file 14.xlsx]

## Sheet: KEGG for up regulated
Pathway-ID	Term Name	MainClass	GeneHitsInSelectedSet	AllGenesInSelectedSet	GeneHitsInBackground	AllGenesInBackground	p-value	enrichFactor	corrected p-value(BH method)
ko04075	Plant hormone signal transduction	A09130 Environmental Information Processing	61	913	994	24778	7.28091e-05	1.66548	0.00120135
ko04626	Plant-pathogen interaction	A09150 Organismal Systems	36	913	1048	24778	0.693083	0.932259	1.0638
ko04016	MAPK signaling pathway - plant	A09130 Environmental Information Processing	33	913	428	24778	5.94065e-05	2.0925	0.00117625
ko04146	Peroxisome	A09140 Cellular Processes	27	913	260	24778	1.39049e-06	2.81829	5.50632e-05
ko00270	Cysteine and methionine metabolism	A09100 Metabolism	27	913	323	24778	7.1654e-05	2.26859	0.00128977
ko00280	Valine, leucine and isoleucine degradation	A09100 Metabolism	25	913	124	24778	3.39351e-12	5.47159	6.71915e-10
ko00630	Glyoxylate and dicarboxylate metabolism	A09100 Metabolism	25	913	244	24778	4.30291e-06	2.78065	0.000121711
ko00500	Starch and sucrose metabolism	A09100 Metabolism	21	913	381	24778	0.0445183	1.49586	0.187545
ko04120	Ubiquitin mediated proteolysis	A09120 Genetic Information Processing	21	913	395	24778	0.0605664	1.44284	0.214145
ko00520	Amino sugar and nucleotide sugar metabolism	A09100 Metabolism	20	913	366	24778	0.0526255	1.48301	0.196601
ko00940	Phenylpropanoid biosynthesis	A09100 Metabolism	19	913	498	24778	0.471377	1.03543	0.864191
ko00620	Pyruvate metabolism	A09100 Metabolism	18	913	234	24778	0.00273383	2.08762	0.0169156
ko00071	Fatty acid degradation	A09100 Metabolism	16	913	119	24778	7.82485e-06	3.64895	0.000193665
ko00561	Glycerolipid metabolism	A09100 Metabolism	16	913	191	24778	0.00196517	2.27343	0.0149655
ko00260	Glycine, serine and threonine metabolism	A09100 Metabolism	16	913	208	24778	0.00457093	2.08762	0.0274256
ko00592	alpha-Linolenic acid metabolism	A09100 Metabolism	15	913	116	24778	2.39627e-05	3.50937	0.00052718
ko00380	Tryptophan metabolism	A09100 Metabolism	15	913	142	24778	0.000245766	2.86681	0.00324411
ko00052	Galactose metabolism	A09100 Metabolism	15	913	145	24778	0.000308755	2.80749	0.00382084
ko00250	Alanine, aspartate and glutamate metabolism	A09100 Metabolism	15	913	158	24778	0.000767809	2.5765	0.00723934
ko00330	Arginine and proline metabolism	A09100 Metabolism	15	913	159	24778	0.000819578	2.56029	0.0070555
ko00130	Ubiquinone and other terpenoid-quinone biosynthesis	A09100 Metabolism	14	913	114	24778	7.87951e-05	3.33287	0.00120011
ko00053	Ascorbate and aldarate metabolism	A09100 Metabolism	13	913	126	24778	0.000779311	2.80007	0.0070138
ko00350	Tyrosine metabolism	A09100 Metabolism	12	913	110	24778	0.00074718	2.96063	0.00739708
ko00360	Phenylalanine metabolism	A09100 Metabolism	12	913	116	24778	0.00119594	2.80749	0.00947186
ko00860	Porphyrin and chlorophyll metabolism	A09100 Metabolism	12	913	126	24778	0.00242675	2.58468	0.0160165
ko00460	Cyanoamino acid metabolism	A09100 Metabolism	11	913	164	24778	0.0407591	1.82031	0.17934
ko00051	Fructose and mannose metabolism	A09100 Metabolism	11	913	184	24778	0.0789891	1.62245	0.248251
ko00710	Carbon fixation in photosynthetic organisms	A09100 Metabolism	11	913	210	24778	0.154116	1.42157	0.418013
ko00195	Photosynthesis	A09100 Metabolism	11	913	211	24778	0.157563	1.41483	0.410492
ko00010	Glycolysis / Gluconeogenesis	A09100 Metabolism	11	913	314	24778	0.610565	0.950733	1.0159
ko00640	Propanoate metabolism	A09100 Metabolism	10	913	93	24778	0.00224148	2.91818	0.0158504
ko04136	Autophagy - other	A09140 Cellular Processes	10	913	118	24778	0.0119572	2.29992	0.0623036
ko00564	Glycerophospholipid metabolism	A09100 Metabolism	10	913	264	24778	0.509804	1.028	0.893285
ko01040	Biosynthesis of unsaturated fatty acids	A09100 Metabolism	9	913	78	24778	0.00225587	3.13143	0.0154022
ko00480	Glutathione metabolism	A09100 Metabolism	9	913	272	24778	0.675215	0.897985	1.06954
ko03040	Spliceosome	A09120 Genetic Information Processing	9	913	498	24778	0.995223	0.490466	1.17996
ko00650	Butanoate metabolism	A09100 Metabolism	8	913	52	24778	0.000588528	4.17525	0.00613308
ko00410	beta-Alanine metabolism	A09100 Metabolism	8	913	110	24778	0.0505602	1.97375	0.204305
ko04712	Circadian rhythm - plant	A09150 Organismal Systems	8	913	110	24778	0.0505602	1.97375	0.204305
ko00040	Pentose and glucuronate interconversions	A09100 Metabolism	8	913	280	24778	0.8136	0.775403	1.1425
ko03013	RNA transport	A09120 Genetic Information Processing	8	913	486	24778	0.997496	0.446734	1.14828
ko04141	Protein processing in endoplasmic reticulum	A09120 Genetic Information Processing	8	913	580	24778	0.999776	0.374332	1.05296
ko03010	Ribosome	A09120 Genetic Information Processing	8	913	1091	24778	1	0.199003	1.03125
ko00730	Thiamine metabolism	A09100 Metabolism	7	913	49	24778	0.00200663	3.87701	0.0147153
ko00290	Valine, leucine and isoleucine biosynthesis	A09100 Metabolism	7	913	66	24778	0.0106349	2.87839	0.0569109
ko00906	Carotenoid biosynthesis	A09100 Metabolism	7	913	83	24778	0.0333656	2.28884	0.150145
ko00100	Steroid biosynthesis	A09100 Metabolism	7	913	93	24778	0.0559234	2.04273	0.205053
ko00310	Lysine degradation	A09100 Metabolism	7	913	94	24778	0.0585961	2.021	0.210946
ko00910	Nitrogen metabolism	A09100 Metabolism	7	913	113	24778	0.124033	1.68118	0.350836
ko00920	Sulfur metabolism	A09100 Metabolism	7	913	115	24778	0.132488	1.65195	0.364341
ko00400	0 Phenylalanine, tyrosine and tryptophan biosynthesis	A09100 Metabolism	7	913	143	24778	0.275651	1.32849	0.613247
ko00562	Inositol phosphate metabolism	A09100 Metabolism	7	913	183	24778	0.513903	1.03811	0.892569
ko00240	Pyrimidine metabolism	A09100 Metabolism	7	913	325	24778	0.957355	0.584535	1.22294
ko04144	Endocytosis	A09140 Cellular Processes	7	913	472	24778	0.998735	0.402487	1.12358
ko00590	Arachidonic acid metabolism	A09100 Metabolism	6	913	54	24778	0.0141299	3.01546	0.0717364
ko00565	Ether lipid metabolism	A09100 Metabolism	6	913	69	24778	0.0414904	2.35992	0.178589
ko00770	Pantothenate and CoA biosynthesis	A09100 Metabolism	6	913	76	24778	0.0612497	2.14256	0.212762
ko04130	SNARE interactions in vesicular transport	A09120 Genetic Information Processing	6	913	123	24778	0.30082	1.32386	0.640456
ko00230	Purine metabolism	A09100 Metabolism	6	913	419	24778	0.998322	0.388627	1.14259
ko00190	Oxidative phosphorylation	A09100 Metabolism	6	913	471	24778	0.999599	0.345721	1.06984
ko00591	Linoleic acid metabolism	A09100 Metabolism	5	913	31	24778	0.00514573	4.37727	0.0299663
ko00950	Isoquinoline alkaloid biosynthesis	A09100 Metabolism	5	913	61	24778	0.0737964	2.22452	0.239536
ko00600	Sphingolipid metabolism	A09100 Metabolism	5	913	71	24778	0.120835	1.9112	0.346744
ko00960	Tropane, piperidine and pyridine alkaloid biosynthesis	A09100 Metabolism	5	913	101	24778	0.315776	1.34352	0.658144
ko00220	Arginine biosynthesis	A09100 Metabolism	5	913	112	24778	0.396423	1.21157	0.784918
ko00900	Terpenoid backbone biosynthesis	A09100 Metabolism	5	913	152	24778	0.663266	0.892734	1.0677
ko00030	Pentose phosphate pathway	A09100 Metabolism	5	913	155	24778	0.679947	0.875455	1.06849
ko00020	Citrate cycle (TCA cycle)	A09100 Metabolism	5	913	175	24778	0.776698	0.775403	1.11439
ko03015	mRNA surveillance pathway	A09120 Genetic Information Processing	5	913	378	24778	0.998437	0.358983	1.13615
ko00966	Glucosinolate biosynthesis	A09100 Metabolism	4	913	57	24778	0.15796	1.9045	0.406184
ko00340	Histidine metabolism	A09100 Metabolism	4	913	59	24778	0.172281	1.83994	0.431792
ko02010	ABC transporters	A09130 Environmental Information Processing	4	913	60	24778	0.179604	1.80927	0.433677
ko03018	RNA degradation	A09120 Genetic Information Processing	4	913	341	24778	0.998784	0.318347	1.11728
ko00471	D-Glutamine and D-glutamate metabolism	A09100 Metabolism	3	913	12	24778	0.00854887	6.78478	0.0470188
ko04122	Sulfur relay system	A09120 Genetic Information Processing	3	913	27	24778	0.0757531	3.01546	0.241921
ko00603	Glycosphingolipid biosynthesis - globo and isoglobo series	A09100 Metabolism	3	913	31	24778	0.10471	2.62636	0.309442
ko00430	Taurine and hypotaurine metabolism	A09100 Metabolism	3	913	37	24778	0.15469	2.20047	0.413901
ko00740	Riboflavin metabolism	A09100 Metabolism	3	913	43	24778	0.210458	1.89343	0.496081
ko00760	Nicotinate and nicotinamide metabolism	A09100 Metabolism	3	913	49	24778	0.269771	1.66158	0.606984
ko00908	Zeatin biosynthesis	A09100 Metabolism	3	913	59	24778	0.371204	1.37995	0.749983
ko00941	Flavonoid biosynthesis	A09100 Metabolism	3	913	81	24778	0.577879	1.00515	0.986379
ko00073	Cutin, suberine and wax biosynthesis	A09100 Metabolism	3	913	97	24778	0.698491	0.839354	1.05573
ko00061	Fatty acid biosynthesis	A09100 Metabolism	3	913	128	24778	0.855066	0.636073	1.19228
ko03022	Basal transcription factors	A09120 Genetic Information Processing	3	913	142	24778	0.898647	0.573361	1.17836
ko03420	Nucleotide excision repair	A09120 Genetic Information Processing	3	913	253	24778	0.995835	0.321808	1.16672
ko03008	Ribosome biogenesis in eukaryotes	A09120 Genetic Information Processing	3	913	254	24778	0.995961	0.320541	1.16
ko04145	Phagosome	A09140 Cellular Processes	3	913	286	24778	0.99851	0.284676	1.12974
ko01053	Biosynthesis of siderophore group nonribosomal peptides	A09100 Metabolism	2	913	8	24778	0.0327605	6.78478	0.150851
ko00902	Monoterpenoid biosynthesis	A09100 Metabolism	2	913	14	24778	0.0921143	3.87701	0.284979
ko00601	Glycosphingolipid biosynthesis - lacto and neolacto series	A09100 Metabolism	2	913	15	24778	0.10378	3.61855	0.316131
ko0072	Synthesis and degradation of ketone bodies	A09100 Metabolism	2	913	15	24778	0.10378	3.61855	0.316131
ko00903	Limonene and pinene degradation	A09100 Metabolism	2	913	17	24778	0.128189	3.19284	0.357485
ko00660	C5-Branched dibasic acid metabolism	A09100 Metabolism	2	913	27	24778	0.262268	2.0103	0.596885
ko00750	Vitamin B6 metabolism	A09100 Metabolism	2	913	36	24778	0.384756	1.50773	0.769511
ko00261	Monobactam biosynthesis	A09100 Metabolism	2	913	38	24778	0.410916	1.42837	0.789917
ko00300	Lysine biosynthesis	A09100 Metabolism	2	913	45	24778	0.497722	1.20618	0.879902
ko00790	Folate biosynthesis	A09100 Metabolism	2	913	63	24778	0.680065	0.861559	1.06026
ko00062	Fatty acid elongation	A09100 Metabolism	2	913	93	24778	0.861691	0.583637	1.19311
ko03410	Base excision repair	A09120 Genetic Information Processing	2	913	101	24778	0.890792	0.537408	1.18374
ko03020	RNA polymerase	A09120 Genetic Information Processing	2	913	118	24778	0.934743	0.459985	1.20967
ko00510	N-Glycan biosynthesis	A09100 Metabolism	2	913	133	24778	0.959069	0.408107	1.21728
ko03060	Protein export	A09120 Genetic Information Processing	2	913	148	24778	0.974564	0.366745	1.21361
ko00970	Aminoacyl-tRNA biosynthesis	A09120 Genetic Information Processing	2	913	163	24778	0.984316	0.332995	1.21809
ko03050	Proteasome	A09120 Genetic Information Processing	2	913	184	24778	0.992117	0.29499	1.1978
ko03340	Homologous recombination	A09120 Genetic Information Processing	2	913	240	24778	0.9988	0.226159	1.11102
ko00604	Glycosphingolipid biosynthesis - ganglio series	A09100 Metabolism	1	913	9	24778	0.286765	3.01546	0.630883
ko00531	Glycosaminoglycan degradation	A09100 Metabolism	1	913	17	24778	0.471887	1.59642	0.857189
ko00333	Prodigiosin biosynthesis	A09100 Metabolism	1	913	23	24778	0.578479	1.17996	0.978964
ko00901	Indole alkaloid biosynthesis	A09100 Metabolism	1	913	27	24778	0.637311	1.00515	1.04287
ko00905	Brassinosteroid biosynthesis	A09100 Metabolism	1	913	28	24778	0.650689	0.969254	1.05604
ko00514	Other types of O-glycan biosynthesis	A09100 Metabolism	1	913	29	24778	0.663575	0.935831	1.05958
ko00511	Other glycan degradation	A09100 Metabolism	1	913	36	24778	0.741415	0.753864	1.07941
ko00945	Stilbenoid, diarylheptanoid and gingerol biosynthesis	A09100 Metabolism	1	913	42	24778	0.793643	0.646169	1.12244
ko00450	Selenocompound metabolism	A09100 Metabolism	1	913	54	24778	0.868605	0.502576	1.19433
ko00670	One carbon pool by folate	A09100 Metabolism	1	913	56	24778	0.87813	0.484627	1.18279
ko00780	Biotin metabolism	A09100 Metabolism	1	913	56	24778	0.87813	0.484627	1.18279
ko00904	Diterpenoid biosynthesis	A09100 Metabolism	1	913	75	24778	0.940396	0.361855	1.20908
ko03430	Mismatch repair	A09120 Genetic Information Processing	1	913	183	24778	0.998988	0.148301	1.09889
ko04070	Phosphatidylinositol signaling system	A09130 Environmental Information Processing	1	913	203	24778	0.999525	0.13369	1.07558
ko03030	DNA replication	A09120 Genetic Information Processing	1	913	220	24778	0.999751	0.12336	1.06425

## Sheet: KEGG for down regulated
Pathway-ID	Term Name	MainClass	GeneHitsInSelectedSet	AllGenesInSelectedSet	GeneHitsInBackground	AllGenesInBackground	p-value	enrichFactor	corrected p-value(BH method)
ko03010	Ribosome	A09120 Genetic Information Processing	205	1171	1091	24778	0	3.97593	0
ko03086	Ribosome biogenesis in eukaryotes	A09120 Genetic Information Processing	66	1171	254	24778	0	5.49819	0
ko00230	Purine metabolism	A09100 Metabolism	51	1171	419	24778	6.59956e-10	2.57552	1.09793e-08
ko04141	Protein processing in endoplasmic reticulum	A09120 Genetic Information Processing	42	1171	580	24778	0.00424001	1.53225	0.0267559
ko03018	RNA degradation	A09120 Genetic Information Processing	38	1171	341	24778	9.32342e-07	2.35797	1.2187e-05
ko03013	RNA transport	A09120 Genetic Information Processing	37	1171	486	24778	0.00313197	1.61092	0.0204697
ko00010	Glycolysis / Gluconeogenesis	A09100 Metabolism	36	1171	314	24778	9.13351e-07	2.42595	1.28572e-05
ko00240	Pyrimidine metabolism	A09100 Metabolism	33	1171	325	24778	3.27781e-05	2.14852	0.000374899
ko04626	Plant-pathogen interaction	A09150 Organismal Systems	26	1171	1048	24778	0.99995	0.524954	1.09575
ko00620	Pyruvate metabolism	A09100 Metabolism	24	1171	234	24778	0.000319353	2.17022	0.00307588
ko00630	Glyoxylate and dicarboxylate metabolism	A09100 Metabolism	23	1171	244	24778	0.00134133	1.99456	0.00981856
ko03030	DNA replication	A09120 Genetic Information Processing	22	1171	220	24778	0.000781952	2.11597	0.00715486
ko00710	Carbon fixation in photosynthetic organisms	A09100 Metabolism	21	1171	210	24778	0.00101743	2.11597	0.00809521
ko03040	Spliceosome	A09120 Genetic Information Processing	21	1171	498	24778	0.735442	0.892276	1.26968
ko00260	Glycine, serine and threonine metabolism	A09100 Metabolism	18	1171	208	24778	0.0100619	1.83113	0.0593979
ko00250	Alanine, aspartate and glutamate metabolism	A09100 Metabolism	17	1171	158	24778	0.00134291	2.27668	0.00945205
ko00270	Cysteine and methionine metabolism	A09100 Metabolism	17	1171	323	24778	0.359228	1.11367	1.01136
ko00520	Amino sugar and nucleotide sugar metabolism	A09100 Metabolism	17	1171	366	24778	0.564469	0.982827	1.20114
ko00500	Starch and sucrose metabolism	A09100 Metabolism	16	1171	381	24778	0.721372	0.888596	1.28166
ko00020	Citrate cycle (TCA cycle)	A09100 Metabolism	15	1171	175	24778	0.0191718	1.81369	0.103189
ko00220	Arginine biosynthesis	A09100 Metabolism	14	1171	112	24778	0.000818454	2.64496	0.00713224
ko04145	Phagosome	A09140 Cellular Processes	14	1171	286	24778	0.485183	1.03579	1.18385
ko04075	Plant hormone signal transduction	A09130 Environmental Information Processing	14	1171	994	24778	1	0.298024	1.02235
ko00040	Pentose and glucuronate interconversions	A09100 Metabolism	13	1171	280	24778	0.56621	0.982414	1.19099
ko03440	Homologous recombination	A09120 Genetic Information Processing	12	1171	240	24778	0.462675	1.05798	1.15986
ko00190	Oxidative phosphorylation	A09100 Metabolism	12	1171	471	24778	0.994623	0.5391	1.22158
ko00061	Fatty acid biosynthesis	A09100 Metabolism	11	1171	128	24778	0.040247	1.81841	0.199059
ko00030	Pentose phosphate pathway	A09100 Metabolism	11	1171	155	24778	0.117263	1.50166	0.447066
ko03430	Mismatch repair	A09120 Genetic Information Processing	11	1171	183	24778	0.248879	1.27189	0.759081
ko00480	Glutathione metabolism	A09100 Metabolism	11	1171	272	24778	0.743161	0.855723	1.25924
ko03015	mRNA surveillance pathway	A09120 Genetic Information Processing	11	1171	378	24778	0.971368	0.615758	1.30706
ko00051	Fructose and mannose metabolism	A09100 Metabolism	10	1171	184	24778	0.371399	1.14998	1.01442
ko03420	Nucleotide excision repair	A09120 Genetic Information Processing	10	1171	253	24778	0.76146	0.836351	1.27841
ko00670	One carbon pool by folate	A09100 Metabolism	9	1171	56	24778	0.00116416	3.40066	0.00887668
ko00910	Nitrogen metabolism	A09100 Metabolism	9	1171	113	24778	0.0870356	1.68529	0.353945
ko03020	RNA polymerase	A09120 Genetic Information Processing	9	1171	118	24778	0.106569	1.61387	0.41494
ko00310	Lysine degradation	A09100 Metabolism	8	1171	94	24778	0.0765935	1.80082	0.333729
ko00920	Sulfur metabolism	A09100 Metabolism	8	1171	115	24778	0.177429	1.47198	0.601288
ko00053	Ascorbate and aldarate metabolism	A09100 Metabolism	8	1171	126	24778	0.245898	1.34347	0.7627
ko00970	Aminoacyl-tRNA biosynthesis	A09120 Genetic Information Processing	8	1171	163	24778	0.507695	1.03851	1.2066
ko00460	Cyanoamino acid metabolism	A09100 Metabolism	8	1171	164	24778	0.514671	1.03218	1.2075
ko00564	Glycerophospholipid metabolism	A09100 Metabolism	8	1171	264	24778	0.93498	0.641203	1.34725
ko00940	Phenylpropanoid biosynthesis	A09100 Metabolism	8	1171	498	24778	0.999956	0.339915	1.08924
ko00062	Fatty acid elongation	A09100 Metabolism	7	1171	93	24778	0.150509	1.59267	0.540062
ko03060	Protein export	A09120 Genetic Information Processing	7	1171	148	24778	0.553492	1.0008	1.23523
ko00330	Arginine and proline metabolism	A09100 Metabolism	7	1171	159	24778	0.629468	0.931559	1.27992
ko03050	Proteasome	A09120 Genetic Information Processing	7	1171	184	24778	0.771637	0.804988	1.28372
ko04120	Ubiquitin mediated proteolysis	A09120 Genetic Information Processing	7	1171	395	24778	0.99951	0.374982	1.12215
ko04144	Endocytosis	A09140 Cellular Processes	7	1171	472	24778	0.999969	0.313809	1.08281
ko00261	Monobactam biosynthesis	A09100 Metabolism	6	1171	38	24778	0.00830026	3.341	0.0506316
ko00300	Lysine biosynthesis	A09100 Metabolism	6	1171	45	24778	0.0185441	2.82129	0.102836
ko00780	Biotin metabolism	A09100 Metabolism	6	1171	56	24778	0.0479821	2.26711	0.214164
ko00640	Propanoate metabolism	A09100 Metabolism	6	1171	93	24778	0.276524	1.36514	0.829572
ko00280	Valine, leucine and isoleucine degradation	A09100 Metabolism	6	1171	124	24778	0.535381	1.02386	1.20956
ko00280	Tryptophan metabolism	A09100 Metabolism	6	1171	142	24778	0.66726	0.894072	1.29903
ko01040	Biosynthesis of unsaturated fatty acids	A09100 Metabolism	5	1171	78	24778	0.308492	1.35639	0.91055
ko00100	Steroid biosynthesis	A09100 Metabolism	5	1171	93	24778	0.449836	1.13762	1.14333
ko03410	Base excision repair	A09120 Genetic Information Processing	5	1171	101	24778	0.522561	1.04751	1.21049
ko00071	Fatty acid degradation	A09100 Metabolism	5	1171	119	24778	0.667967	0.889063	1.28672
ko00760	Nicotinate and nicotinamide metabolism	A09100 Metabolism	4	1171	49	24778	0.200235	1.72732	0.64286
ko02010	ABC transporters	A09130 Environmental Information Processing	4	1171	60	24778	0.314985	1.41065	0.914956
ko00290	Valine, leucine and isoleucine biosynthesis	A09100 Metabolism	4	1171	66	24778	0.380072	1.28241	1.02284
ko00770	Pantothenate and CoA biosynthesis	A09100 Metabolism	4	1171	76	24778	0.486254	1.11367	1.17085
ko00400	Phenylalanine, tyrosine and tryptophan biosynthesis	A09100 Metabolism	4	1171	143	24778	0.910699	0.59188	1.34402
ko00561	Glycerolipid metabolism	A09100 Metabolism	4	1171	191	24778	0.981553	0.443135	1.27393
ko00195	Photosynthesis	A09100 Metabolism	4	1171	211	24778	0.990896	0.401132	1.25926
ko04016	MAPK signaling pathway - plant	A09130 Environmental Information Processing	4	1171	428	24778	0.999998	0.197754	1.0578
ko00333	Prodigiosin biosynthesis	A09100 Metabolism	3	1171	23	24778	0.0923848	2.75996	0.367531
ko00750	Vitamin B6 metabolism	A09100 Metabolism	3	1171	36	24778	0.241072	1.76331	0.760623
ko00450	Selenocompound metabolism	A09100 Metabolism	3	1171	54	24778	0.472989	1.17554	1.16969
ko00908	Zeatin biosynthesis	A09100 Metabolism	3	1171	59	24778	0.532543	1.07592	1.21819
ko00950	Isoquinoline alkaloid biosynthesis	A09100 Metabolism	3	1171	61	24778	0.555279	1.04064	1.20971
ko00350	Tyrosine metabolism	A09100 Metabolism	3	1171	110	24778	0.897316	0.577083	1.33503
ko00360	Phenylalanine metabolism	A09100 Metabolism	3	1171	116	24778	0.916182	0.547233	1.34129
ko00052	Galactose metabolism	A09100 Metabolism	3	1171	145	24778	0.970046	0.437787	1.32476
ko00562	Inositol phosphate metabolism	A09100 Metabolism	3	1171	183	24778	0.992896	0.34688	1.2277
ko00072	Synthesis and degradation of ketone bodies	A09100 Metabolism	2	1171	15	24778	0.156281	2.82129	0.549987
ko00903	Limonene and pinene degradation	A09100 Metabolism	2	1171	17	24778	0.190584	2.48938	0.634124
ko00531	Glycosaminoglycan degradation	A09100 Metabolism	2	1171	17	24778	0.190584	2.48938	0.634124
ko00905	Brassinosteroid biosynthesis	A09100 Metabolism	2	1171	28	24778	0.384189	1.51141	1.01894
ko00730	Thiamine metabolism	A09100 Metabolism	2	1171	49	24778	0.680313	0.863661	1.28348
ko00650	Butanoate metabolism	A09100 Metabolism	2	1171	52	24778	0.71159	0.813834	1.28932
ko00563	Glycosylphosphatidylinositol (GPI)-anchor biosynthesis	A09100 Metabolism	2	1171	52	24778	0.71159	0.813834	1.28932
ko00590	Arachidonic acid metabolism	A09100 Metabolism	2	1171	54	24778	0.730986	0.783692	1.28625
ko00340	Histidine metabolism	A09100 Metabolism	2	1171	59	24778	0.774667	0.717278	1.27715
ko00073	Cutin, suberine and wax biosynthesis	A09100 Metabolism	2	1171	97	24778	0.947249	0.436282	1.34377
ko00960	Tropane, piperidine and pyridine alkaloid biosynthesis	A09100 Metabolism	2	1171	101	24778	0.95508	0.419004	1.3342
ko00410	beta-Alanine metabolism	A09100 Metabolism	2	1171	110	24778	0.968835	0.384722	1.33306
ko00592	alpha-Linolenic acid metabolism	A09100 Metabolism	2	1171	116	24778	0.975644	0.364822	1.28448
ko00900	Terpenoid backbone biosynthesis	A09100 Metabolism	2	1171	152	24778	0.994654	0.278417	1.21348
ko04070	Phosphatidylinositol signaling system	A09130 Environmental Information Processing	2	1171	203	24778	0.999423	0.20847	1.13599
ko00440	Phosphonate and phosphinate metabolism	A09100 Metabolism	1	1171	28	24778	0.742392	0.755703	1.2697
ko00511	Other glycan degradation	A09100 Metabolism	1	1171	36	24778	0.825202	0.587769	1.34832
ko00430	Taurine and hypotaurine metabolism	A09100 Metabolism	1	1171	37	24778	0.833475	0.571884	1.33795
ko00945	Stilbenoid, diarylheptanoid and gingerol biosynthesis	A09100 Metabolism	1	1171	42	24778	0.869328	0.503802	1.35972
ko00740	Riboflavin metabolism	A09100 Metabolism	1	1171	43	24778	0.875514	0.492086	1.32412
ko00790	Folate biosynthesis	A09100 Metabolism	1	1171	63	24778	0.952827	0.335868	1.34129
ko00904	Diterpenoid biosynthesis	A09100 Metabolism	1	1171	75	24778	0.973656	0.282129	1.29115
ko00941	Flavonoid biosynthesis	A09100 Metabolism	1	1171	81	24778	0.980316	0.261231	1.28141
ko04712	Circadian rhythm - plant	A09150 Organismal Systems	1	1171	110	24778	0.995192	0.192361	1.20609
ko00130	Ubiquinone and other terpenoid-quinone biosynthesis	A09100 Metabolism	1	1171	114	24778	0.996042	0.185611	1.19918
ko04130	SNARE interactions in vesicular transport	A09120 Genetic Information Processing	1	1171	123	24778	0.997445	0.17203	1.17763
ko00860	Porphyrin and chlorophyll metabolism	A09100 Metabolism	1	1171	126	24778	0.997792	0.167934	1.17049
ko00510	N-Glycan biosynthesis	A09100 Metabolism	1	1171	133	24778	0.99843	0.159095	1.16377
ko04146	Peroxisome	A09140 Cellular Processes	1	1171	260	24778	0.999997	0.0813834	1.06395
