# Supplementary material for: Overdominance at the Gene Expression Level Plays a Critical Role in the Hybrid Root Growth of Brassica napus
Source: Int J Mol Sci. 2021 Aug 26;22(17):9246. doi: 10.3390/ijms22179246 (PMC8431428; doi:10.3390/ijms22179246)
Supplement: Supplementary file 1 [file ijms-22-09246-s001.zip › ijms-1346590-supplementary/Supplementary Materials/Supplementary file 15.xlsx]

## Sheet: KEGG for up-regulated
Pathway ID	Pathway_name	MainClass	GeneHitsInSelectedSet	AllGenesInSelectedSet	GeneHitsInBackground	AllGenesInBackground	p-value	enrichFactor	corrected p-value(BH method)
ko04075	Plant hormone signal transduction	A09130 Environmental Information Processing	23	432	994	24778	0.0103772	1.32716	0.297706
ko00280	Valine, leucine and isoleucine degradation	A09100 Metabolism	22	432	124	24778	4.44089e-16	10.1761	3.88578e-14
ko00052	Galactose metabolism	A09100 Metabolism	18	432	145	24778	8.56074e-11	7.12011	2.99626e-09
ko00250	Alanine, aspartate and glutamate metabolism	A09100 Metabolism	16	432	158	24778	1.89698e-08	5.80825	5.53287e-07
ko04016	MAPK signaling pathway - plant	A09130 Environmental Information Processing	16	432	428	24778	0.00372166	2.14417	0.0210094
ko00630	Glyoxylate and dicarboxylate metabolism	A09100 Metabolism	15	432	244	24778	2.77801e-05	3.52601	0.000347251
ko04146	Peroxisome	A09140 Cellular Processes	15	432	260	24778	5.75395e-05	3.30903	0.000671294
ko00561	Glycerolipid metabolism	A09100 Metabolism	14	432	191	24778	7.16196e-06	4.20414	0.00011394
ko00260	Glycine, serine and threonine metabolism	A09100 Metabolism	14	432	208	24778	1.8836e-05	3.86053	0.000253561
ko00592	alpha-Linolenic acid metabolism	A09100 Metabolism	13	432	116	24778	1.2435e-07	6.42788	3.10875e-06
ko00270	Cysteine and methionine metabolism	A09100 Metabolism	13	432	323	24778	0.00467075	2.30847	0.0233537
ko00500	Starch and sucrose metabolism	A09100 Metabolism	13	432	381	24778	0.0169997	1.95705	0.0691849
ko00071	Fatty acid degradation	A09100 Metabolism	11	432	119	24778	7.77065e-06	5.30186	0.000113322
ko00010	Glycolysis / Gluconeogenesis	A09100 Metabolism	11	432	314	24778	0.0226534	2.0093	0.0880966
ko00520	Amino sugar and nucleotide sugar metabolism	A09100 Metabolism	11	432	366	24778	0.0573733	1.72383	0.18944
ko00290	Valine, leucine and isoleucine biosynthesis	A09100 Metabolism	10	432	66	24778	2.06553e-07	8.69038	4.51834e-06
ko00710	Carbon fixation in photosynthetic organisms	A09100 Metabolism	10	432	210	24778	0.00395746	2.73126	0.0203693
ko00620	Pyruvate metabolism	A09100 Metabolism	10	432	234	24778	0.00830133	2.45113	0.039263
ko04120	Ubiquitin mediated proteolysis	A09120 Genetic Information Processing	10	432	395	24778	0.154695	1.45206	0.398111
ko00770	Pantothenate and CoA biosynthesis	A09100 Metabolism	9	432	76	24778	6.94886e-06	6.79221	0.000121605
ko00330	Arginine and proline metabolism	A09100 Metabolism	9	432	159	24778	0.00195614	3.24659	0.013693
ko00650	Butanoate metabolism	A09100 Metabolism	8	432	52	24778	3.07681e-06	8.82407	5.98269e-05
ko00350	Tyrosine metabolism	A09100 Metabolism	8	432	110	24778	0.000696375	4.17138	0.00609328
ko00053	Ascorbate and aldarate metabolism	A09100 Metabolism	8	432	126	24778	0.00167879	3.64168	0.0122412
ko00380	Tryptophan metabolism	A09100 Metabolism	8	432	142	24778	0.00352934	3.23135	0.0220584
ko00051	Fructose and mannose metabolism	A09100 Metabolism	8	432	184	24778	0.0157492	2.49376	0.067222
ko01040	Biosynthesis of unsaturated fatty acids	A09100 Metabolism	7	432	78	24778	0.000424843	5.14738	0.00391302
ko00640	Propanoate metabolism	A09100 Metabolism	7	432	93	24778	0.00121927	4.31715	0.00969878
ko00410	beta-Alanine metabolism	A09100 Metabolism	7	432	110	24778	0.00318549	3.64996	0.0206467
ko00910	Nitrogen metabolism	A09100 Metabolism	7	432	113	24778	0.00369883	3.55306	0.0215765
ko00130	Ubiquinone and other terpenoid-quinone biosynthesis	A09100 Metabolism	7	432	114	24778	0.00388318	3.52189	0.0212362
ko00480	Glutathione metabolism	A09100 Metabolism	7	432	272	24778	0.198675	1.47609	0.463574
ko04626	Plant-pathogen interaction	A09150 Organismal Systems	7	432	1048	24778	0.999336	0.383106	1.0599
ko00920	Sulfur metabolism	A09100 Metabolism	6	432	115	24778	0.0155546	2.99251	0.0680514
ko00360	Phenylalanine metabolism	A09100 Metabolism	6	432	116	24778	0.01617	2.96671	0.0673749
ko00195	Photosynthesis	A09100 Metabolism	6	432	211	24778	0.164415	1.63099	0.411036
ko00564	Glycerophospholipid metabolism	A09100 Metabolism	6	432	264	24778	0.313723	1.30356	0.610017
ko00660	C5-Branched dibasic acid metabolism	A09100 Metabolism	5	432	27	24778	9.25864e-05	10.6216	0.00101266
ko00591	Linoleic acid metabolism	A09100 Metabolism	5	432	31	24778	0.000184008	9.25105	0.0018942
ko00340	Histidine metabolism	A09100 Metabolism	5	432	59	24778	0.00363969	4.86072	0.0219637
ko00310	Lysine degradation	A09100 Metabolism	5	432	94	24778	0.0244283	3.05088	0.0890616
ko00220	Arginine biosynthesis	A09100 Metabolism	5	432	112	24778	0.0465457	2.56056	0.159716
ko04136	Autophagy - other	A09140 Cellular Processes	5	432	118	24778	0.0559019	2.43036	0.188131
ko00030	Pentose phosphate pathway	A09100 Metabolism	5	432	155	24778	0.135124	1.85021	0.36948
ko00240	Pyrimidine metabolism	A09100 Metabolism	5	432	325	24778	0.671613	0.882407	0.996036
ko00190	Oxidative phosphorylation	A09100 Metabolism	5	432	471	24778	0.915805	0.60888	1.17843
ko03040	Spliceosome	A09120 Genetic Information Processing	5	432	498	24778	0.936841	0.575868	1.16275
ko03010	Ribosome	A09120 Genetic Information Processing	5	432	1091	24778	0.999975	0.262862	1.04164
ko00966	Glucosinolate biosynthesis	A09100 Metabolism	4	432	57	24778	0.0174131	4.02502	0.0692566
ko00565	Ether lipid metabolism	A09100 Metabolism	4	432	69	24778	0.0324406	3.32501	0.115859
ko00600	Sphingolipid metabolism	A09100 Metabolism	4	432	71	24778	0.0354998	3.23135	0.124249
ko00860	Porphyrin and chlorophyll metabolism	A09100 Metabolism	4	432	126	24778	0.178204	1.82084	0.433134
ko00460	Cyanoamino acid metabolism	A09100 Metabolism	4	432	164	24778	0.320881	1.39894	0.617078
ko00020	Citrate cycle (TCA cycle)	A09100 Metabolism	4	432	175	24778	0.364335	1.31101	0.678283
ko00562	Inositol phosphate metabolism	A09100 Metabolism	4	432	183	24778	0.395894	1.25369	0.714242
ko04141	Protein processing in endoplasmic reticulum	A09120 Genetic Information Processing	4	432	580	24778	0.991466	0.395562	1.14149
ko00471	D-Glutamine and D-glutamate metabolism	A09100 Metabolism	3	432	12	24778	0.00102988	14.3391	0.00858235
ko00590	Arachidonic acid metabolism	A09100 Metabolism	3	432	54	24778	0.0680377	3.18647	0.208888
ko00906	Carotenoid biosynthesis	A09100 Metabolism	3	432	83	24778	0.176545	2.07313	0.435147
ko00100	Steroid biosynthesis	A09100 Metabolism	3	432	93	24778	0.221124	1.85021	0.496112
ko04712	Circadian rhythm - plant	A09150 Organismal Systems	3	432	110	24778	0.300831	1.56427	0.591522
ko00900	Terpenoid backbone biosynthesis	A09100 Metabolism	3	432	152	24778	0.495978	1.13204	0.842681
ko00230	Purine metabolism	A09100 Metabolism	3	432	419	24778	0.978095	0.410667	1.17237
ko00902	Monoterpenoid biosynthesis	A09100 Metabolism	2	432	14	24778	0.0240282	8.19378	0.0894668
ko00901	Indole alkaloid biosynthesis	A09100 Metabolism	2	432	27	24778	0.0799878	4.24863	0.241342
ko00603	Glycosphingolipid biosynthesis - globo and isoglobo series	A09100 Metabolism	2	432	31	24778	0.101332	3.70042	0.300562
ko00511	Other glycan degradation	A09100 Metabolism	2	432	36	24778	0.129878	3.18647	0.36659
ko00261	Monobactam biosynthesis	A09100 Metabolism	2	432	38	24778	0.141763	3.01876	0.38167
ko00300	Lysine biosynthesis	A09100 Metabolism	2	432	45	24778	0.184902	2.54918	0.437268
ko00730	Thiamine metabolism	A09100 Metabolism	2	432	49	24778	0.210309	2.34108	0.477975
ko00950	Isoquinoline alkaloid biosynthesis	A09100 Metabolism	2	432	61	24778	0.287813	1.88054	0.572356
ko03410	Base excision repair	A09120 Genetic Information Processing	2	432	101	24778	0.527924	1.13577	0.888333
ko00960	Tropane, piperidine and pyridine alkaloid biosynthesis	A09100 Metabolism	2	432	101	24778	0.527924	1.13577	0.888333
ko00400	Phenylalanine, tyrosine and tryptophan biosynthesis	A09100 Metabolism	2	432	143	24778	0.714888	0.802189	1.05131
ko03060	Protein export	A09120 Genetic Information Processing	2	432	148	24778	0.73243	0.775088	1.0593
ko04070	Phosphatidylinositol signaling system	A09130 Environmental Information Processing	2	432	203	24778	0.87155	0.565088	1.19157
ko00040	Pentose and glucuronate interconversions	A09100 Metabolism	2	432	280	24778	0.957443	0.409689	1.17995
ko04144	Endocytosis	A09140 Cellular Processes	2	432	472	24778	0.997817	0.243036	1.07789
ko00940	Phenylpropanoid biosynthesis	A09100 Metabolism	2	432	498	24778	0.998562	0.230347	1.07208
ko01053	Biosynthesis of siderophore group nonribosomal peptides	A09100 Metabolism	1	432	8	24778	0.131275	7.16956	0.364653
ko00604	Glycosphingolipid biosynthesis - ganglio series	A09100 Metabolism	1	432	9	24778	0.146426	6.37294	0.388251
ko00601	Glycosphingolipid biosynthesis - lacto and neolacto series	A09100 Metabolism	1	432	15	24778	0.231953	3.82377	0.501133
ko00072	Synthesis and degradation of ketone bodies	A09100 Metabolism	1	432	15	24778	0.231953	3.82377	0.501133
ko00524	Neomycin, kanamycin and gentamicin biosynthesis	A09100 Metabolism	1	432	16	24778	0.245352	3.58478	0.511149
ko00903	Limonene and pinene degradation	A09100 Metabolism	1	432	17	24778	0.258517	3.37391	0.532242
ko00531	Glycosaminoglycan degradation	A09100 Metabolism	1	432	17	24778	0.258517	3.37391	0.532242
ko03450	Non-homologous end-joining	A09120 Genetic Information Processing	1	432	18	24778	0.271454	3.18647	0.546028
ko04122	Sulfur relay system	A09120 Genetic Information Processing	1	432	27	24778	0.378204	2.12431	0.689435
ko00750	Vitamin B6 metabolism	A09100 Metabolism	1	432	36	24778	0.469344	1.59324	0.829648
ko00430	Taurine and hypotaurine metabolism	A09100 Metabolism	1	432	37	24778	0.478609	1.55018	0.837566
ko00740	Riboflavin metabolism	A09100 Metabolism	1	432	43	24778	0.530908	1.33387	0.8765
ko00760	Nicotinate and nicotinamide metabolism	A09100 Metabolism	1	432	49	24778	0.577972	1.17054	0.911218
ko00450	Selenocompound metabolism	A09100 Metabolism	1	432	54	24778	0.613572	1.06216	0.950223
ko00908	Zeatin biosynthesis	A09100 Metabolism	1	432	59	24778	0.646176	0.972144	0.991936
ko02010	ABC transporters	A09130 Environmental Information Processing	1	432	60	24778	0.652359	0.955941	0.99272
ko00790	Folate biosynthesis	A09100 Metabolism	1	432	63	24778	0.67027	0.91042	1.00254
ko00904	Diterpenoid biosynthesis	A09100 Metabolism	1	432	75	24778	0.733168	0.764753	1.05168
ko00941	Flavonoid biosynthesis	A09100 Metabolism	1	432	81	24778	0.759972	0.708105	1.08126
ko00062	Fatty acid elongation	A09100 Metabolism	1	432	93	24778	0.805789	0.616736	1.1281
ko03020	RNA polymerase	A09120 Genetic Information Processing	1	432	118	24778	0.875121	0.486072	1.18718
ko04130	SNARE interactions in vesicular transport	A09120 Genetic Information Processing	1	432	123	24778	0.885684	0.466313	1.18317
ko03022	Basal transcription factors	A09120 Genetic Information Processing	1	432	142	24778	0.918306	0.403919	1.17302
ko03030	DNA replication	A09120 Genetic Information Processing	1	432	220	24778	0.97949	0.260711	1.15818
ko03440	Homologous recombination	A09120 Genetic Information Processing	1	432	240	24778	0.98562	0.238985	1.14989
ko03420	Nucleotide excision repair	A09120 Genetic Information Processing	1	432	253	24778	0.988586	0.226705	1.14571
ko04145	Phagosome	A09140 Cellular Processes	1	432	286	24778	0.993653	0.200547	1.13653
ko03018	RNA degradation	A09120 Genetic Information Processing	1	432	341	24778	0.997618	0.168201	1.08437
ko03013	RNA transport	A09120 Genetic Information Processing	1	432	486	24778	0.999822	0.118017	1.04772

## Sheet: KEGG for down-regulated
Term	Name	MainClass	GeneHitsInSelectedSet	AllGenesInSelectedSet	GeneHitsInBackground	AllGenesInBackground	p-value	enrichFactor	corrected p-value(BH method)
ko00520	Amino sugar and nucleotide sugar metabolism	A09100 Metabolism	12	221	366	24778	0.00011926	3.67599	0.0026436
ko00062	Fatty acid elongation	A09100 Metabolism	5	221	93	24778	0.00148363	6.02783	0.0246653
ko00903	Limonene and pinene degradation	A09100 Metabolism	2	221	17	24778	0.00986122	13.1903	0.0936815
ko03060	Protein export	A09120 Genetic Information Processing	5	221	148	24778	0.0106606	3.78776	0.0945242
ko00010	Glycolysis / Gluconeogenesis	A09100 Metabolism	7	221	314	24778	0.0230409	2.49944	0.170247
ko00380	Tryptophan metabolism	A09100 Metabolism	4	221	142	24778	0.0386155	3.15824	0.270308
ko00052	Galactose metabolism	A09100 Metabolism	4	221	145	24778	0.0411796	3.0929	0.273844
ko00537	Glycosylphosphatidylinositol (GPI)-anchored proteins	A09180 Brite Hierarchies	2	221	37	24778	0.0429974	6.06041	0.272317
ko00604	Glycosphingolipid biosynthesis - ganglio series	A09100 Metabolism	1	221	9	24778	0.0774798	12.4575	0.468401
ko03051	Proteasome	A09180 Brite Hierarchies	5	221	255	24778	0.0788729	2.19839	0.456091
ko00940	Phenylpropanoid biosynthesis	A09100 Metabolism	8	221	498	24778	0.0788862	1.80109	0.437161
ko00230	Purine metabolism	A09100 Metabolism	7	221	419	24778	0.0824651	1.87309	0.438714
ko03018	RNA degradation	A09120 Genetic Information Processing	6	221	341	24778	0.0858357	1.97274	0.42282
ko00670	One carbon pool by folate	A09100 Metabolism	2	221	56	24778	0.0891854	4.0042	0.423631
ko00071	Fatty acid degradation	A09100 Metabolism	3	221	119	24778	0.0906653	2.8265	0.41581
ko00340	Histidine metabolism	A09100 Metabolism	2	221	59	24778	0.0974171	3.8006	0.431883
ko00280	Valine, leucine and isoleucine degradation	A09100 Metabolism	3	221	124	24778	0.099519	2.71252	0.426969
ko00040	Pentose and glucuronate interconversions	A09100 Metabolism	5	221	280	24778	0.106426	2.0021	0.442332
ko04075	Plant hormone signal transduction	A09130 Environmental Information Processing	13	221	994	24778	0.109224	1.46633	0.440204
ko03040	Spliceosome	A09120 Genetic Information Processing	7	221	498	24778	0.158672	1.57595	0.514717
ko03008	Ribosome biogenesis in eukaryotes	A09120 Genetic Information Processing	4	221	254	24778	0.192231	1.76563	0.608732
ko00310	Lysine degradation	A09100 Metabolism	2	221	94	24778	0.20469	2.38548	0.618722
ko04626	Plant-pathogen interaction	A09150 Organismal Systems	12	221	1048	24778	0.227365	1.28379	0.657382
ko00603	Glycosphingolipid biosynthesis - globo and isoglobo series	A09100 Metabolism	1	221	31	24778	0.242631	3.6167	0.686594
ko04144	Endocytosis	A09140 Cellular Processes	6	221	472	24778	0.246615	1.42522	0.68333
ko00410	beta-Alanine metabolism	A09100 Metabolism	2	221	110	24778	0.257236	2.0385	0.698212
ko00920	Sulfur metabolism	A09100 Metabolism	2	221	115	24778	0.273751	1.94987	0.728179
ko00260	Glycine, serine and threonine metabolism	A09100 Metabolism	3	221	208	24778	0.283846	1.61708	0.740225
ko00261	Monobactam biosynthesis	A09100 Metabolism	1	221	38	24778	0.288732	2.95046	0.738487
ko00053	Ascorbate and aldarate metabolism	A09100 Metabolism	2	221	126	24778	0.30999	1.77965	0.763494
ko00945	Stilbenoid, diarylheptanoid and gingerol biosynthesis	A09100 Metabolism	1	221	42	24778	0.31381	2.66947	0.745298
ko00620	Pyruvate metabolism	A09100 Metabolism	3	221	234	24778	0.347086	1.43741	0.782413
ko00730	Thiamine metabolism	A09100 Metabolism	1	221	49	24778	0.355596	2.28812	0.788238
ko00630	Glyoxylate and dicarboxylate metabolism	A09100 Metabolism	3	221	244	24778	0.371354	1.3785	0.783969
ko00450	Selenocompound metabolism	A09100 Metabolism	1	221	54	24778	0.383883	2.07625	0.785483
ko00966	Glucosinolate biosynthesis	A09100 Metabolism	1	221	57	24778	0.400258	1.96698	0.794542
ko00330	Arginine and proline metabolism	A09100 Metabolism	2	221	159	24778	0.415515	1.41028	0.800921
ko02010	ABC transporters	A09130 Environmental Information Processing	1	221	60	24778	0.4162	1.86863	0.79078
ko00564	Glycerophospholipid metabolism	A09100 Metabolism	3	221	264	24778	0.419311	1.27406	0.77456
ko00196	Photosynthesis - antenna proteins	A09100 Metabolism	1	221	62	24778	0.426593	1.80835	0.777217
ko00290	Valine, leucine and isoleucine biosynthesis	A09100 Metabolism	1	221	66	24778	0.446829	1.69875	0.792377
ko00020	Citrate cycle (TCA cycle)	A09100 Metabolism	2	221	175	24778	0.463801	1.28134	0.811652
ko04145	Phagosome	A09140 Cellular Processes	3	221	286	24778	0.470602	1.17606	0.812858
ko00770	Pantothenate and CoA biosynthesis	A09100 Metabolism	1	221	76	24778	0.494364	1.47523	0.842954
ko01040	Biosynthesis of unsaturated fatty acids	A09100 Metabolism	1	221	78	24778	0.503371	1.43741	0.847447
ko00561	Glycerolipid metabolism	A09100 Metabolism	2	221	191	24778	0.509677	1.17401	0.847338
ko00941	Flavonoid biosynthesis	A09100 Metabolism	1	221	81	24778	0.516583	1.38417	0.848217
ko00710	Carbon fixation in photosynthetic organisms	A09100 Metabolism	2	221	210	24778	0.560728	1.06779	0.898515
ko00100	Steroid biosynthesis	A09100 Metabolism	1	221	93	24778	0.566023	1.20557	0.896204
ko00350	Tyrosine metabolism	A09100 Metabolism	1	221	110	24778	0.627567	1.01925	0.959384
ko00220	Arginine biosynthesis	A09100 Metabolism	1	221	112	24778	0.63421	1.00105	0.958522
ko00910	Nitrogen metabolism	A09100 Metabolism	1	221	113	24778	0.637488	0.992192	0.95265
ko03020	RNA polymerase	A09120 Genetic Information Processing	1	221	118	24778	0.653441	0.95015	0.955029
ko00500	Starch and sucrose metabolism	A09100 Metabolism	3	221	381	24778	0.663211	0.882816	0.958772
ko00860	Porphyrin and chlorophyll metabolism	A09100 Metabolism	1	221	126	24778	0.677526	0.889823	0.958627
ko00061	Fatty acid biosynthesis	A09100 Metabolism	1	221	128	24778	0.683282	0.875919	0.956594
ko04016	MAPK signaling pathway - plant	A09130 Environmental Information Processing	3	221	428	24778	0.737737	0.785871	0.98119
ko00030	Pentose phosphate pathway	A09100 Metabolism	1	221	155	24778	0.751679	0.72334	0.989834
ko00250	Alanine, aspartate and glutamate metabolism	A09100 Metabolism	1	221	158	24778	0.758305	0.709605	0.988771
ko00270	Cysteine and methionine metabolism	A09100 Metabolism	2	221	323	24778	0.785687	0.694227	0.995204
ko00562	Inositol phosphate metabolism	A09100 Metabolism	1	221	183	24778	0.807106	0.612665	1.00323
ko00051	Fructose and mannose metabolism	A09100 Metabolism	1	221	184	24778	0.808839	0.609335	0.996071
ko03050	Proteasome	A09120 Genetic Information Processing	1	221	184	24778	0.808839	0.609335	0.996071
ko03013	RNA transport	A09120 Genetic Information Processing	3	221	486	24778	0.81108	0.692084	0.980669
ko04070	Phosphatidylinositol signaling system	A09130 Environmental Information Processing	1	221	203	24778	0.838977	0.552304	0.996285
ko00480	Glutathione metabolism	A09100 Metabolism	1	221	272	24778	0.91374	0.412197	1.05676
ko00240	Pyrimidine metabolism	A09100 Metabolism	1	221	325	24778	0.946658	0.344977	1.02362
ko03015	mRNA surveillance pathway	A09120 Genetic Information Processing	1	221	378	24778	0.967049	0.296608	1.02894
ko03010	Ribosome	A09120 Genetic Information Processing	5	221	1091	24778	0.968545	0.51383	1.0143
ko00190	Oxidative phosphorylation	A09100 Metabolism	1	221	471	24778	0.985885	0.238042	1.01645
