# Supplementary material for: Overdominance at the Gene Expression Level Plays a Critical Role in the Hybrid Root Growth of Brassica napus
Source: Int J Mol Sci. 2021 Aug 26;22(17):9246. doi: 10.3390/ijms22179246 (PMC8431428; doi:10.3390/ijms22179246)
Supplement: Supplementary file 1 [file ijms-22-09246-s001.zip › ijms-1346590-supplementary/Supplementary Materials/Supplementary file 16.xlsx]

## Sheet: KEGG for up regulated
Term	Name	MainClass	GeneHitsInSelectedSet	AllGenesInSelectedSet	GeneHitsInBackground	AllGenesInBackground	p-value	enrichFactor	corrected p-value(BH method)
ko00940	Phenylpropanoid biosynthesis	A09150 Organismal Systems	6	286	110	24778	0.00176346	4.72562	0.278627
ko00592	alpha-Linolenic acid metabolism	A09100 Metabolism	103	286	7000	24778	0.00248461	1.27479	0.196284
ko04130	SNARE interactions in vesicular transport	A09100 Metabolism	13	286	498	24778	0.00550387	2.26159	0.28987
ko00010	Glycolysis / Gluconeogenesis	A09100 Metabolism	18	286	840	24778	0.0091527	1.85649	0.361532
ko00500	Starch and sucrose metabolism	A09150 Organismal Systems	21	286	1158	24778	0.0280672	1.57113	0.739104
ko01008	Polyketide biosynthesis proteins	A09100 Metabolism	4	286	116	24778	0.0456612	2.98746	0.801609
ko00073	Cutin, suberine and wax biosynthesis	A09120 Genetic Information Processing	4	286	123	24778	0.0544638	2.81744	0.860528
ko00760	Nicotinate and nicotinamide metabolism	A09100 Metabolism	6	286	234	24778	0.0548629	2.22145	0.78803
ko00330	Arginine and proline metabolism	A09100 Metabolism	3	286	83	24778	0.0713662	3.13143	0.939655
ko00460	Cyanoamino acid metabolism	A09100 Metabolism	7	286	314	24778	0.0728736	1.93138	0.885695
ko00966	Glucosinolate biosynthesis	A09100 Metabolism	3	286	97	24778	0.102158	2.67948	1.00881
ko02010	ABC transporters	A09100 Metabolism	2	286	49	24778	0.109743	3.53618	1.01996
ko00903	Limonene and pinene degradation	A09100 Metabolism	2	286	49	24778	0.109743	3.53618	1.01996
ko00561	Glycerolipid metabolism	A09120 Genetic Information Processing	3	286	101	24778	0.111783	2.57336	0.929565
ko03450	Non-homologous end-joining	A09100 Metabolism	4	286	159	24778	0.112701	2.17953	0.890336
ko00199	Cytochrome P450	A09100 Metabolism	3	286	110	24778	0.134621	2.36281	0.924789
ko04626	Plant-pathogen interaction	A09100 Metabolism	2	286	57	24778	0.140495	3.03987	0.924924
ko99977	Transport	A09100 Metabolism	16	286	1029	24778	0.140876	1.34712	0.890334
ko03060	Protein export	A09100 Metabolism	2	286	59	24778	0.148448	2.93683	0.868698
ko04122	Sulfur relay system	A09100 Metabolism	1	286	14	24778	0.15005	6.18831	0.84671
ko00660	C5-Branched dibasic acid metabolism	A09130 Environmental Information Processing	2	286	60	24778	0.152459	2.88788	0.830639
ko03000	Transcription factors	A09130 Environmental Information Processing	2	286	60	24778	0.152459	2.88788	0.830639
ko00905	Brassinosteroid biosynthesis	A09100 Metabolism	3	286	119	24778	0.158906	2.18411	0.809907
ko00603	Glycosphingolipid biosynthesis - globo and isoglobo series	A09100 Metabolism	1	286	15	24778	0.159866	5.77576	0.789339
ko00270	Cysteine and methionine metabolism	A09100 Metabolism	1	286	17	24778	0.179161	5.09626	0.857799
ko00960	Tropane, piperidine and pyridine alkaloid biosynthesis	A09100 Metabolism	4	286	191	24778	0.180023	1.81437	0.836578
ko04091	Lectins	A09120 Genetic Information Processing	1	286	18	24778	0.188642	4.81313	0.851582
ko00750	Vitamin B6 metabolism	A09100 Metabolism	10	286	632	24778	0.197079	1.37083	0.841581
ko02044	Secretion system	A09100 Metabolism	8	286	498	24778	0.219479	1.39175	0.866943
ko00430	Taurine and hypotaurine metabolism	A09150 Organismal Systems	15	286	1048	24778	0.231899	1.24002	0.872382
ko04146	Peroxisome	A09130 Environmental Information Processing	20	286	1447	24778	0.233281	1.19746	0.857173
ko00740	Riboflavin metabolism	A09180 Brite Hierarchies	3	286	147	24778	0.2412	1.76809	0.866126
ko02000	Transporters	A09120 Genetic Information Processing	3	286	148	24778	0.244272	1.75614	0.83902
ko00040	Pentose and glucuronate interconversions	A09100 Metabolism	18	286	1309	24778	0.254983	1.19133	0.822191
ko00520	Amino sugar and nucleotide sugar metabolism	A09130 Environmental Information Processing	14	286	994	24778	0.260203	1.22023	0.822242
ko00860	Porphyrin and chlorophyll metabolism	A09120 Genetic Information Processing	1	286	27	24778	0.269207	3.20875	0.817976
ko00053	Ascorbate and aldarate metabolism	A09100 Metabolism	1	286	27	24778	0.269207	3.20875	0.817976
ko01002	Peptidases	A09100 Metabolism	5	286	323	24778	0.317562	1.34112	0.850421
ko03029	Mitochondrial biogenesis	A09100 Metabolism	2	286	101	24778	0.325437	1.71557	0.856985
ko00061	Fatty acid biosynthesis	A09130 Environmental Information Processing	18	286	1387	24778	0.338223	1.12434	0.861924
ko00450	Selenocompound metabolism	A09100 Metabolism	1	286	36	24778	0.341798	2.40657	0.857208
ko00380	Tryptophan metabolism	A09140 Cellular Processes	4	286	260	24778	0.352988	1.33287	0.845031
ko00400	Phenylalanine, tyrosine and tryptophan biosynthesis	A09100 Metabolism	2	286	110	24778	0.363159	1.57521	0.856404
ko04090	CD molecules	A09100 Metabolism	2	286	113	24778	0.375562	1.53339	0.87263
ko01004	Lipid biosynthesis proteins	A09100 Metabolism	4	286	280	24778	0.40515	1.23766	0.901602
ko00900	Terpenoid backbone biosynthesis	A09100 Metabolism	5	286	366	24778	0.415503	1.18356	0.911799
ko03400	DNA repair and recombination proteins	A09100 Metabolism	2	286	126	24778	0.428064	1.37518	0.926495
ko00290	Valine, leucine and isoleucine biosynthesis	A09100 Metabolism	2	286	128	24778	0.435939	1.35369	0.894524
ko04016	MAPK signaling pathway - plant	A09100 Metabolism	1	286	54	24778	0.466126	1.60438	0.932252
ko00565	Ether lipid metabolism	A09100 Metabolism	2	286	143	24778	0.493037	1.2117	0.961726
ko03110	Chaperones and folding catalysts	A09100 Metabolism	8	286	664	24778	0.50112	1.04381	0.965573
ko03016	Transfer RNA biogenesis	A09100 Metabolism	2	286	152	24778	0.525504	1.13995	0.97682
ko00190	Oxidative phosphorylation	A09100 Metabolism	1	286	66	24778	0.535711	1.31267	0.972901
ko04145	Phagosome	A09120 Genetic Information Processing	19	286	1650	24778	0.538449	0.997631	0.966762
ko00100	Steroid biosynthesis	A09130 Environmental Information Processing	5	286	428	24778	0.551365	1.01211	0.978828
ko00310	Lysine degradation	A09100 Metabolism	1	286	69	24778	0.551646	1.2556	0.968445
ko00260	Glycine, serine and threonine metabolism	A09100 Metabolism	1	286	81	24778	0.610118	1.06958	1.04781
ko00710	Carbon fixation in photosynthetic organisms	A09100 Metabolism	5	286	471	24778	0.636008	0.919707	1.06903
ko00195	Photosynthesis	A09140 Cellular Processes	3	286	286	24778	0.643832	0.908773	1.07079
ko03041	Spliceosome	A09100 Metabolism	1	286	93	24778	0.660987	0.931574	1.08787
ko00230	Purine metabolism	A09100 Metabolism	1	286	93	24778	0.660987	0.931574	1.08787
ko03030	DNA replication	A09100 Metabolism	1	286	94	24778	0.664915	0.921663	1.07201
ko04121	Ubiquitin system	A09100 Metabolism	2	286	208	24778	0.69479	0.833042	1.10886
ko00240	Pyrimidine metabolism	A09100 Metabolism	2	286	210	24778	0.6998	0.825108	1.09474
ko00360	Phenylalanine metabolism	A09100 Metabolism	2	286	211	24778	0.70228	0.821198	1.08785
ko03020	RNA polymerase	A09100 Metabolism	4	286	419	24778	0.715172	0.827077	1.07616
ko99997	Function unknown	A09100 Metabolism	3	286	325	24778	0.726732	0.79972	1.06318
ko03032	DNA replication proteins	A09100 Metabolism	5	286	532	24778	0.737866	0.814252	1.06957
ko01006	Prenyltransferases	A09100 Metabolism	1	286	116	24778	0.740726	0.746865	1.05437
ko03420	Nucleotide excision repair	A09120 Genetic Information Processing	1	286	118	24778	0.746705	0.734206	1.05339
ko04812	Cytoskeleton proteins	A09100 Metabolism	1	286	124	24778	0.763829	0.69868	1.06801
ko03013	RNA transport	A09120 Genetic Information Processing	2	286	253	24778	0.791915	0.684872	1.05145
ko00052	Galactose metabolism	A09120 Genetic Information Processing	1	286	142	24778	0.808583	0.610115	1.05584
ko03040	Spliceosome	A09100 Metabolism	2	286	264	24778	0.811088	0.656336	1.05043
ko03430	Mismatch repair	A09120 Genetic Information Processing	4	286	486	24778	0.81482	0.713056	1.04668
ko00051	Fructose and mannose metabolism	A09100 Metabolism	1	286	145	24778	0.815173	0.597492	1.03869
ko03050	Proteasome	A09120 Genetic Information Processing	4	286	488	24778	0.817296	0.710134	1.03306
ko04031	GTP-binding proteins	A09140 Cellular Processes	10	286	1108	24778	0.827411	0.781917	1.03755
ko01001	Protein kinases	A09140 Cellular Processes	10	286	1108	24778	0.827411	0.781917	1.03755
ko04070	Phosphatidylinositol signaling system	A09120 Genetic Information Processing	4	286	498	24778	0.829275	0.695874	1.0157
ko03018	RNA degradation	A09120 Genetic Information Processing	1	286	183	24778	0.881453	0.473423	1.05507
ko04147	Exosome	A09100 Metabolism	1	286	183	24778	0.881453	0.473423	1.05507
ko04144	Endocytosis	A09100 Metabolism	1	286	184	24778	0.882832	0.47085	1.04095
ko03008	Ribosome biogenesis in eukaryotes	A09120 Genetic Information Processing	1	286	184	24778	0.882832	0.47085	1.04095
ko03011	Ribosome	A09130 Environmental Information Processing	1	286	203	24778	0.906189	0.42678	1.03752
ko00480	Glutathione metabolism	A09120 Genetic Information Processing	2	286	341	24778	0.906468	0.508131	1.03037
ko04141	Protein processing in endoplasmic reticulum	A09140 Cellular Processes	3	286	472	24778	0.911722	0.550655	1.01445
ko03010	Ribosome	A09120 Genetic Information Processing	3	286	580	24778	0.964997	0.448119	1.02329
ko03019	Messenger RNA biogenesis	A09120 Genetic Information Processing	10	286	2241	24778	0.999933	0.386597	1.01275

## Sheet: KEGG for down regulated
Term N	ame	MainClass	GeneHitsInSelectedSet	AllGenesInSelectedSet	GeneHitsInBackground	AllGenesInBackground	p-value	enrichFactor	GeneListInSelectedSets	corrected p-value(BH method)
ko00380	Tryptophan metabolism	A09100 Metabolism	30	176	1309	24778	1.27109e-08	3.22653	[BnaA08g16370D, BnaC03g70580D, BnaA09g18440D, BnaA06g37960D, BnaA06g05000D, BnaA06g22040D, BnaC03g74750D, BnaA10g04310D, BnaC09g51700D, BnaCnng25440D, BnaC04g12850D, BnaC08g45780D, BnaC05g18610D, BnaC03g49350D, BnaC06g17610D, BnaC09g10380D, BnaC09g20710D, BnaC09g20370D, BnaC08g06430D, BnaC02g01610D, BnaA01g08470D, BnaC03g21300D, BnaC02g05560D, BnaA03g56490D, BnaC01g03420D, BnaA09g44550D, BnaC05g4…	1.81766e-06
ko00270	Cysteine and methionine metabolism	A09100 Metabolism	9	176	124	24778	2.64123e-07	10.2182	[BnaC08g45780D, BnaA08g16370D, BnaC03g70580D, BnaA09g18440D, BnaC09g20370D, BnaA06g37960D, BnaC08g06430D, BnaA03g56490D, BnaC01g00550D]	1.25899e-05
ko00790	Folate biosynthesis	A09100 Metabolism	8	176	158	24778	1.79827e-05	7.12831	[BnaA08g16370D, BnaA06g22040D, BnaC02g01610D, BnaC03g74750D, BnaC03g21300D, BnaC02g05560D, BnaA03g56490D, BnaC01g00550D]	0.000642883
ko00770	Pantothenate and CoA biosynthesis	A09100 Metabolism	4	176	52	24778	0.000510465	10.8295	[BnaA09g18440D, BnaC09g20370D, BnaC03g21300D, BnaC04g12850D]	0.0145993
ko00561	Glycerolipid metabolism	A09100 Metabolism	6	176	142	24778	0.000543559	5.94862	[BnaC01g03420D, BnaA09g18440D, BnaC09g20370D, BnaC08g06430D, BnaC05g18610D, BnaC08g43780D]	0.0129548
ko00640	Propanoate metabolism	A09100 Metabolism	13	176	664	24778	0.000961017	2.75632	[BnaA06g13830D, BnaA06g37960D, BnaC08g06310D, BnaC01g01800D, BnaCnng50900D, BnaA01g08470D, BnaA10g04310D, BnaC05g23530D, BnaC04g12850D, BnaC01g22400D, BnaA09g06790D, BnaCnng14630D, BnaA09g42620D]	0.0196322
ko99997	Function unknown	A09100 Metabolism	5	176	119	24778	0.0016246	5.9153	[BnaA06g28680D, BnaA09g18440D, BnaC09g20370D, BnaC08g06430D, BnaC05g04370D]	0.0290398
ko02000	Transporters	A09100 Metabolism	10	176	498	24778	0.00307222	2.82699	[BnaC01g22400D, BnaC04g40260D, BnaC06g05340D, BnaA09g18440D, BnaC09g20370D, BnaC08g06430D, BnaAnng35070D, BnaA10g23640D, BnaA10g28940D, BnaC01g04060D]	0.0488142
ko00910	Nitrogen metabolism	A09100 Metabolism	3	176	43	24778	0.00352911	9.82215	[BnaA09g06790D, BnaCnng50900D, BnaA09g42620D]	0.0504663
ko00941	Flavonoid biosynthesis	A09100 Metabolism	4	176	94	24778	0.00456606	5.99081	[BnaA09g18440D, BnaC09g20370D, BnaC08g06430D, BnaC06g17610D]	0.0502266
ko00340	Histidine metabolism	A09100 Metabolism	5	176	152	24778	0.00466905	4.63106	[BnaC01g22400D, BnaA09g18440D, BnaC09g20370D, BnaAnng35070D, BnaC01g04060D]	0.047691
ko04131	Membrane trafficking	A09100 Metabolism	2	176	15	24778	0.004957	18.7712	[BnaA09g18440D, BnaC09g20370D]	0.0472567
ko00903	Limonene and pinene degradation	A09100 Metabolism	4	176	110	24778	0.00792207	5.11942	[BnaC09g10380D, BnaA01g08470D, BnaA10g04310D, BnaC09g20710D]	0.0666386
ko99988	Secondary metabolism	A09100 Metabolism	7	176	323	24778	0.00849762	3.05105	[BnaA08g16370D, BnaA06g37960D, BnaC03g49350D, BnaA01g08470D, BnaCnng25440D, BnaA03g56490D, BnaC01g00550D]	0.0675088
ko04146	Peroxisome	A09100 Metabolism	4	176	114	24778	0.00895956	4.93979	[BnaC08g06310D, BnaA01g08470D, BnaA10g04310D, BnaC05g23530D]	0.0674325
ko01001	Protein kinases	A09100 Metabolism	3	176	63	24778	0.0102415	6.704	[BnaA09g06790D, BnaCnng50900D, BnaA09g42620D]	0.0732269
ko00591	Linoleic acid metabolism	A09100 Metabolism	3	176	66	24778	0.0116209	6.39928	[BnaA09g44550D, BnaA06g37960D, BnaC04g12850D]	0.0791325
ko00950	Isoquinoline alkaloid biosynthesis	A09100 Metabolism	5	176	244	24778	0.0304966	2.88492	[BnaC01g03420D, BnaA09g18440D, BnaC09g20370D, BnaA09g55310D, BnaC09g08480D]	0.174441
ko00051	Fructose and mannose metabolism	A09100 Metabolism	2	176	42	24778	0.0358769	6.704	[BnaA01g18180D, BnaC01g22120D]	0.197323
ko00906	Carotenoid biosynthesis	A09100 Metabolism	4	176	183	24778	0.0418514	3.07725	[BnaC09g14450D, BnaAnng17370D, BnaA10g29530D, BnaC06g04220D]	0.221657
ko00500	Starch and sucrose metabolism	A09130 Environmental Information Processing	4	176	203	24778	0.0571528	2.77407	[BnaC09g14450D, BnaC03g32510D, BnaAnng17370D, BnaC06g04220D]	0.272428
ko00360	Phenylalanine metabolism	A09100 Metabolism	3	176	126	24778	0.0609259	3.352	[BnaA06g13830D, BnaCnng14630D, BnaC01g01800D]	0.281045
ko01004	Lipid biosynthesis proteins	A09100 Metabolism	3	176	126	24778	0.0609259	3.352	[BnaC08g06430D, BnaC09g36790D, BnaA03g52000D]	0.281045
ko00010	Glycolysis / Gluconeogenesis	A09100 Metabolism	2	176	59	24778	0.0659734	4.77234	[BnaC08g06430D, BnaC09g51700D]	0.269548
ko04121	Ubiquitin system	A09100 Metabolism	2	176	61	24778	0.0699244	4.61587	[BnaC09g10380D, BnaA01g08470D]	0.277755
ko04120	Ubiquitin mediated proteolysis	A09100 Metabolism	1	176	12	24778	0.0820021	11.732	[BnaC02g01610D]	0.308587
ko00400	Phenylalanine, tyrosine and tryptophan biosynthesis	A09100 Metabolism	3	176	145	24778	0.0846919	2.91277	[BnaA02g04780D, BnaC05g49280D, BnaA03g40360D]	0.310537
ko02048	Prokaryotic defense system	A09100 Metabolism	4	176	234	24778	0.085986	2.40657	[BnaA09g18440D, BnaC09g20370D, BnaA09g44550D, BnaC08g06430D]	0.3074
ko04933	AGE-RAGE signaling pathway in diabetic complications	A09100 Metabolism	2	176	81	24778	0.11313	3.47615	[BnaA01g18180D, BnaC01g22120D]	0.367674
ko01009	Protein phosphatases and associated proteins	A09100 Metabolism	1	176	17	24778	0.114163	8.28142	[BnaC08g06430D]	0.362785
ko00660	C5-Branched dibasic acid metabolism	A09140 Cellular Processes	4	176	260	24778	0.114645	2.16591	[BnaC01g03420D, BnaA06g28680D, BnaC09g08480D, BnaC05g04370D]	0.356398
ko00310	Lysine degradation	A09100 Metabolism	11	176	1029	24778	0.116523	1.50498	[BnaA06g28680D, BnaC06g23230D, BnaA09g18440D, BnaC09g20370D, BnaA06g27470D, BnaC08g32530D, BnaC08g06430D, BnaCnng01230D, BnaA03g35580D, BnaA04g00340D, BnaC05g04370D]	0.354527
ko00565	Ether lipid metabolism	A09100 Metabolism	2	176	83	24778	0.117763	3.39239	[BnaC04g40260D, BnaC06g05340D]	0.350836
ko00740	Riboflavin metabolism	A09130 Environmental Information Processing	14	176	1387	24778	0.11785	1.42104	[BnaC09g14450D, BnaA03g52720D, BnaAnng17370D, BnaCnng34980D, BnaA06g37300D, BnaC02g05370D, BnaC09g12000D, BnaC01g03420D, BnaC03g32510D, BnaA06g21690D, BnaC09g48340D, BnaC09g19610D, BnaC07g47550D, BnaC06g04220D]	0.34393
ko03029	Mitochondrial biogenesis	A09100 Metabolism	1	176	27	24778	0.175162	5.21423	[BnaC04g12850D]	0.481697
ko00904	Diterpenoid biosynthesis	A09100 Metabolism	2	176	110	24778	0.184054	2.55971	[BnaC08g06430D, BnaC03g21300D]	0.487401
ko00471	D-Glutamine and D-glutamate metabolism	A09130 Environmental Information Processing	5	176	428	24778	0.189491	1.64467	[BnaC01g03420D, BnaA03g52720D, BnaA06g21690D, BnaC09g48340D, BnaC09g19610D]	0.47539
ko01040	Biosynthesis of unsaturated fatty acids	A09100 Metabolism	2	176	113	24778	0.191735	2.49175	[BnaA01g21620D, BnaC02g01610D]	0.472726
ko00710	Carbon fixation in photosynthetic organisms	A09100 Metabolism	2	176	116	24778	0.199458	2.42731	[BnaA01g08470D, BnaA10g04310D]	0.467582
ko00290	Valine, leucine and isoleucine biosynthesis	A09100 Metabolism	8	176	840	24778	0.24843	1.3408	[BnaA06g37960D, BnaC09g10380D, BnaA01g18180D, BnaA01g08470D, BnaC01g22120D, BnaC02g09490D, BnaA06g16160D, BnaA04g29560D]	0.563898
ko00052	Galactose metabolism	A09100 Metabolism	5	176	498	24778	0.280388	1.41349	[BnaA01g18180D, BnaC01g22120D, BnaC02g09490D, BnaA06g16160D, BnaA04g29560D]	0.616854
ko00730	Thiamine metabolism	A09100 Metabolism	3	176	264	24778	0.289277	1.59982	[BnaC06g23230D, BnaA06g27470D, BnaCnng01230D]	0.626766
ko04070	Phosphatidylinositol signaling system	A09100 Metabolism	6	176	632	24778	0.293741	1.33656	[BnaC08g06430D, BnaC02g01610D, BnaC06g31040D, BnaC03g21300D, BnaA03g52000D, BnaA04g29560D]	0.626941
ko03410	Base excision repair	A09100 Metabolism	2	176	155	24778	0.301566	1.81657	[BnaC08g46760D, BnaA03g40360D]	0.624985
ko04812	Cytoskeleton proteins	A09100 Metabolism	1	176	54	24778	0.319786	2.60711	[BnaA03g35580D]	0.644077
ko00040	Pentose and glucuronate interconversions	A09100 Metabolism	1	176	57	24778	0.33421	2.4699	[BnaA06g37960D]	0.654686
ko04145	Phagosome	A09100 Metabolism	1	176	59	24778	0.343657	2.38617	[BnaA10g28940D]	0.664094
ko00960	Tropane, piperidine and pyridine alkaloid biosynthesis	A09100 Metabolism	2	176	184	24778	0.376426	1.53026	[BnaC08g46760D, BnaA03g40360D]	0.708274
ko00199	Cytochrome P450	A09100 Metabolism	3	176	314	24778	0.386016	1.34507	[BnaC08g46760D, BnaC08g06430D, BnaA03g40360D]	0.716886
ko03018	RNA degradation	A09100 Metabolism	1	176	75	24778	0.414585	1.87712	[BnaA10g23640D]	0.714285
ko04141	Protein processing in endoplasmic reticulum	A09100 Metabolism	1	176	78	24778	0.427009	1.80492	[BnaC05g04370D]	0.726932
ko00520	Amino sugar and nucleotide sugar metabolism	A09120 Genetic Information Processing	1	176	101	24778	0.513945	1.3939	[BnaAnng32020D]	0.844759
ko01007	Amino acid related enzymes	A09140 Cellular Processes	8	176	1108	24778	0.532034	1.01649	[BnaC01g03420D, BnaA06g28680D, BnaC09g14450D, BnaA08g11340D, BnaC03g34720D, BnaC09g08480D, BnaC09g21800D, BnaC05g04370D]	0.854842
ko00330	Arginine and proline metabolism	A09140 Cellular Processes	8	176	1108	24778	0.532034	1.01649	[BnaC01g03420D, BnaA06g28680D, BnaC09g14450D, BnaA08g11340D, BnaC03g34720D, BnaC09g08480D, BnaC09g21800D, BnaC05g04370D]	0.854842
ko01003	Glycosyltransferases	A09100 Metabolism	1	176	112	24778	0.550753	1.257	[BnaC02g01610D]	0.846857
ko04626	Plant-pathogen interaction	A09100 Metabolism	1	176	115	24778	0.560302	1.22421	[BnaCnng25440D]	0.852374
ko00630	Glyoxylate and dicarboxylate metabolism	A09130 Environmental Information Processing	7	176	994	24778	0.563021	0.991437	[BnaA03g52720D, BnaC09g19610D, BnaC07g47550D, BnaCnng34980D, BnaA06g37300D, BnaC02g05370D, BnaC09g12000D]	0.847495
ko03400	DNA repair and recombination proteins	A09100 Metabolism	1	176	116	24778	0.56344	1.21366	[BnaC05g04370D]	0.83929
ko03012	Translation factors	A09140 Cellular Processes	1	176	118	24778	0.569649	1.19309	[BnaC03g34720D]	0.839791
ko04147	Exosome	A09100 Metabolism	2	176	282	24778	0.597336	0.998469	[BnaA09g04630D, BnaC02g05370D]	0.862819
ko00230	Purine metabolism	A09100 Metabolism	1	176	128	24778	0.5994	1.09988	[BnaA06g28680D]	0.857143
ko003016	Transfer RNA biogenesis	A09100 Metabolism	1	176	133	24778	0.6135	1.05853	[BnaC02g05370D]	0.868619
ko03032	DNA replication proteins	A09100 Metabolism	1	176	164	24778	0.690543	0.85844	[BnaA04g29560D]	0.968115
ko00190	Oxidative phosphorylation	A09100 Metabolism	1	176	175	24778	0.714036	0.804481	[BnaA09g55310D]	0.9818
ko03000	Transcription factors	A09120 Genetic Information Processing	2	176	395	24778	0.773435	0.712831	[BnaCnng21490D, BnaC07g51150D]	1.05334
ko00860	Porphyrin and chlorophyll metabolism	A09100 Metabolism	6	176	1155	24778	0.834143	0.731346	[BnaA01g21620D, BnaA08g11340D, BnaC08g46760D, BnaC02g01610D, BnaA04g03360D, BnaCnng25440D]	1.09433
ko00053	Ascorbate and aldarate metabolism	A09150 Organismal Systems	6	176	1158	24778	0.835944	0.729451	[BnaC07g10840D, BnaA03g52720D, BnaCnng19880D, BnaA06g26980D, BnaA02g15320D, BnaCnng17910D]	1.08673
ko00260	Glycine, serine and threonine metabolism	A09150 Organismal Systems	6	176	1158	24778	0.835944	0.729451	[BnaC07g10840D, BnaA03g52720D, BnaCnng19880D, BnaA06g26980D, BnaA02g15320D, BnaCnng17910D]	1.08673
ko00220	Arginine biosynthesis	A09140 Cellular Processes	2	176	472	24778	0.851311	0.596543	[BnaC09g14450D, BnaC09g21800D]	1.08694
ko04075	Plant hormone signal transduction	A09120 Genetic Information Processing	2	176	498	24778	0.871561	0.565398	[BnaC01g35220D, BnaC01g23550D]	1.07442
ko00592	alpha-Linolenic acid metabolism	A09100 Metabolism	2	176	532	24778	0.894235	0.529263	[BnaC02g05560D, BnaC05g23810D]	1.08369
ko99980	Enzymes with EC numbers	A09100 Metabolism	1	176	325	24778	0.902906	0.433182	[BnaC05g23810D]	1.085
ko03009	Ribosome biogenesis	A09120 Genetic Information Processing	1	176	341	24778	0.913506	0.412857	[BnaA03g40360D]	1.0886
ko04136	Autophagy - other	A09120 Genetic Information Processing	2	176	580	24778	0.919994	0.485462	[BnaCnng21490D, BnaC02g04180D]	1.08727
ko03019	Messenger RNA biogenesis	A09100 Metabolism	1	176	366	24778	0.927812	0.384656	[BnaC05g49280D]	1.08752
ko00514	Other types of O-glycan biosynthesis	A09150 Organismal Systems	4	176	1048	24778	0.943037	0.537344	[BnaC07g10840D, BnaA03g52720D, BnaA02g15320D, BnaCnng17910D]	1.07883
ko03021	Transcription machinery	A09100 Metabolism	1	176	419	24778	0.950826	0.336	[BnaC02g05560D]	1.06225
ko04016	MAPK signaling pathway - plant	A09120 Genetic Information Processing	4	176	1650	24778	0.997807	0.341295	[BnaCnng21490D, BnaC07g51150D, BnaC02g04180D, BnaA03g40360D]	1.01919
ko00562	Inositol phosphate metabolism	A09120 Genetic Information Processing	7	176	4898	24778	1	0.201202	[BnaAnng32020D, BnaCnng21490D, BnaC07g51150D, BnaC01g35220D, BnaC01g23550D, BnaC02g04180D, BnaA03g40360D]	1
