# Supplementary material for: Overdominance at the Gene Expression Level Plays a Critical Role in the Hybrid Root Growth of Brassica napus
Source: Int J Mol Sci. 2021 Aug 26;22(17):9246. doi: 10.3390/ijms22179246 (PMC8431428; doi:10.3390/ijms22179246)
Supplement: Supplementary file 1 [file ijms-22-09246-s001.zip › ijms-1346590-supplementary/Supplementary Materials/Supplementary file 17.xlsx]

## Sheet: KEGG for up-regulated
Term	Name	MainClass	GeneHitsInSelectedSet	AllGenesInSelectedSet	GeneHitsInBackground	AllGenesInBackground	p-value	enrichFactor	corrected p-value(BH method)
ko04075	Plant hormone signal transduction	A09130 Environmental Information Processing	17	255	994	24778	0.0288062	1.66184	0.613161
ko04144	Endocytosis	A09140 Cellular Processes	7	255	472	24778	0.214868	1.44106	0.889314
ko04626	Plant-pathogen interaction	A09150 Organismal Systems	7	255	1048	24778	0.917825	0.649027	1.08536
ko03010	Ribosome	A09120 Genetic Information Processing	7	255	1091	24778	0.935519	0.623447	1.08056
ko03019	Messenger RNA biogenesis	A09180 Brite Hierarchies	7	255	1099	24778	0.938415	0.618908	1.06736
ko04016	MAPK signaling pathway - plant	A09130 Environmental Information Processing	6	255	428	24778	0.279458	1.36218	0.991412
ko00730	Thiamine metabolism	A09100 Metabolism	5	255	49	24778	0.000146253	9.91517	0.0217916
ko04145	Phagosome	A09140 Cellular Processes	5	255	286	24778	0.173376	1.69875	0.807284
ko03040	Spliceosome	A09120 Genetic Information Processing	5	255	498	24778	0.58412	0.975589	1.11582
ko04141	Protein processing in endoplasmic reticulum	A09120 Genetic Information Processing	5	255	580	24778	0.715299	0.837661	1.12189
ko04712	Circadian rhythm - plant	A09150 Organismal Systems	4	255	110	24778	0.0271033	3.5334	0.673065
ko00330	Arginine and proline metabolism	A09100 Metabolism	4	255	159	24778	0.082268	2.44449	0.612897
ko03018	RNA degradation	A09120 Genetic Information Processing	4	255	341	24778	0.466703	1.13981	1.10379
ko04120	Ubiquitin mediated proteolysis	A09120 Genetic Information Processing	4	255	395	24778	0.58184	0.983986	1.1259
ko00230	Purine metabolism	A09100 Metabolism	4	255	419	24778	0.628232	0.927624	1.18489
ko00906	Carotenoid biosynthesis	A09100 Metabolism	3	255	83	24778	0.054305	3.51212	0.53943
ko03410	Base excision repair	A09120 Genetic Information Processing	3	255	101	24778	0.0863639	2.8862	0.584919
ko00400	Phenylalanine, tyrosine and tryptophan biosynthesis	A09100 Metabolism	3	255	143	24778	0.183002	2.0385	0.826281
ko00900	Terpenoid backbone biosynthesis	A09100 Metabolism	3	255	152	24778	0.206521	1.9178	0.879188
ko00562	Inositol phosphate metabolism	A09100 Metabolism	3	255	183	24778	0.291485	1.59293	0.987074
ko004070	Phosphatidylinositol signaling system	A09130 Environmental Information Processing	3	255	203	24778	0.347648	1.43599	0.996146
ko00620	Pyruvate metabolism	A09100 Metabolism	3	255	234	24778	0.433473	1.24575	1.17432
ko00270	Cysteine and methionine metabolism	A09100 Metabolism	3	255	323	24778	0.648479	0.902495	1.16414
ko00190	Oxidative phosphorylation	A09100 Metabolism	3	255	471	24778	0.865731	0.618908	1.10251
ko00440	Phosphonate and phosphinate metabolism	A09100 Metabolism	2	255	28	24778	0.0334524	6.94062	0.553823
ko00910	Nitrogen metabolism	A09100 Metabolism	2	255	113	24778	0.324365	1.7198	0.986335
ko00130	Ubiquinone and other terpenoid-quinone biosynthesis	A09100 Metabolism	2	255	114	24778	0.328132	1.70471	0.977833
ko00360	Phenylalanine metabolism	A09100 Metabolism	2	255	116	24778	0.335648	1.67532	0.980619
ko00860	Porphyrin and chlorophyll metabolism	A09100 Metabolism	2	255	126	24778	0.372816	1.54236	1.0481
ko03060	Protein export	A09120 Genetic Information Processing	2	255	148	24778	0.451296	1.31309	1.15936
ko00030	Pentose phosphate pathway	A09100 Metabolism	2	255	155	24778	0.475099	1.25379	1.05656
ko00970	Aminoacyl-tRNA biosynthesis	A09120 Genetic Information Processing	2	255	163	24778	0.501526	1.19225	1.03788
ko03050	Proteasome	A09120 Genetic Information Processing	2	255	184	24778	0.566695	1.05618	1.12583
ko00260	Glycine, serine and threonine metabolism	A09100 Metabolism	2	255	208	24778	0.633406	0.934314	1.17972
ko00195	Photosynthesis	A09100 Metabolism	2	255	211	24778	0.641159	0.92103	1.16503
ko03030	DNA replication	A09120 Genetic Information Processing	2	255	220	24778	0.663643	0.883351	1.11104
ko00630	Glyoxylate and dicarboxylate metabolism	A09100 Metabolism	2	255	244	24778	0.718083	0.796464	1.11452
ko04146	Peroxisome	A09140 Cellular Processes	2	255	260	24778	0.750124	0.747451	1.09577
ko00040	Pentose and glucuronate interconversions	A09100 Metabolism	2	255	280	24778	0.785741	0.694062	1.09416
ko00240	Pyrimidine metabolism	A09100 Metabolism	2	255	325	24778	0.849999	0.597961	1.11096
ko00500	Starch and sucrose metabolism	A09100 Metabolism	2	255	381	24778	0.905369	0.510072	1.0792
ko00940	Phenylpropanoid biosynthesis	A09100 Metabolism	2	255	498	24778	0.965475	0.390235	1.04243
ko00405	Phenazine biosynthesis	A09100 Metabolism	1	255	10	24778	0.0982933	9.71686	0.610238
ko00601	Glycosphingolipid biosynthesis - lacto and neolacto series	A09100 Metabolism	1	255	15	24778	0.143769	6.47791	0.823905
ko03450	Non-homologous end-joining	A09120 Genetic Information Processing	1	255	18	24778	0.16995	5.39826	0.87319
ko00901	Indole alkaloid biosynthesis	A09100 Metabolism	1	255	27	24778	0.243804	3.59884	0.955968
ko04122	Sulfur relay system	A09120 Genetic Information Processing	1	255	27	24778	0.243804	3.59884	0.955968
ko00905	Brassinosteroid biosynthesis	A09100 Metabolism	1	255	28	24778	0.251595	3.47031	0.93719
ko00603	Glycosphingolipid biosynthesis - globo and isoglobo series	A09100 Metabolism	1	255	31	24778	0.274491	3.13447	0.997539
ko00750	Vitamin B6 metabolism	A09100 Metabolism	1	255	36	24778	0.31111	2.69913	0.986286
ko00909	Sesquiterpenoid and triterpenoid biosynthesis	A09100 Metabolism	1	255	52	24778	0.416367	1.86863	1.14886
ko00966	Glucosinolate biosynthesis	A09100 Metabolism	1	255	57	24778	0.44585	1.70471	1.16547
ko00908	Zeatin biosynthesis	A09100 Metabolism	1	255	59	24778	0.457223	1.64693	1.13544
ko02010	ABC transporters	A09130 Environmental Information Processing	1	255	60	24778	0.462822	1.61948	1.1305
ko00196	Photosynthesis - antenna proteins	A09100 Metabolism	1	255	62	24778	0.473849	1.56724	1.08621
ko00790	Folate biosynthesis	A09100 Metabolism	1	255	63	24778	0.479277	1.54236	1.05018
ko00565	Ether lipid metabolism	A09100 Metabolism	1	255	69	24778	0.510696	1.40824	1.04238
ko00073	Cutin, suberine and wax biosynthesis	A09100 Metabolism	1	255	97	24778	0.6341	1.00174	1.16643
ko00960	Tropane, piperidine and pyridine alkaloid biosynthesis	A09100 Metabolism	1	255	101	24778	0.64899	0.962066	1.13764
ko00350	Tyrosine metabolism	A09100 Metabolism	1	255	110	24778	0.680322	0.883351	1.12631
ko00410	beta-Alanine metabolism	A09100 Metabolism	1	255	110	24778	0.680322	0.883351	1.12631
ko00920	Sulfur metabolism	A09100 Metabolism	1	255	115	24778	0.696508	0.844945	1.12804
ko04136	Autophagy - other	A09140 Cellular Processes	1	255	118	24778	0.705825	0.823463	1.11881
ko04130	SNARE interactions in vesicular transport	A09120 Genetic Information Processing	1	255	123	24778	0.720725	0.789989	1.10709
ko00280	Valine, leucine and isoleucine degradation	A09100 Metabolism	1	255	124	24778	0.723614	0.783618	1.08907
ko00053	Ascorbate and aldarate metabolism	A09100 Metabolism	1	255	126	24778	0.729301	0.77118	1.08666
ko03022	Basal transcription factors	A09120 Genetic Information Processing	1	255	142	24778	0.770801	0.684286	1.11504
ko00250	Alanine, aspartate and glutamate metabolism	A09100 Metabolism	1	255	158	24778	0.80596	0.614991	1.10173
ko00460	Cyanoamino acid metabolism	A09100 Metabolism	1	255	164	24778	0.817712	0.592492	1.09765
ko03430	Mismatch repair	A09120 Genetic Information Processing	1	255	183	24778	0.850447	0.530976	1.10188
ko00710	Carbon fixation in photosynthetic organisms	A09100 Metabolism	1	255	210	24778	0.887145	0.462708	1.08348
ko03420	Nucleotide excision repair	A09120 Genetic Information Processing	1	255	253	24778	0.927971	0.384066	1.08022
ko00564	Glycerophospholipid metabolism	A09100 Metabolism	1	255	264	24778	0.935795	0.368063	1.07257
ko00480	Glutathione metabolism	A09100 Metabolism	1	255	272	24778	0.940948	0.357238	1.06213
ko00010	Glycolysis / Gluconeogenesis	A09100 Metabolism	1	255	314	24778	0.961957	0.309454	1.04622
ko00520	Amino sugar and nucleotide sugar metabolism	A09100 Metabolism	1	255	366	24778	0.977951	0.265488	1.04082
ko03015	mRNA surveillance pathway	A09120 Genetic Information Processing	1	255	378	24778	0.980562	0.25706	1.0362
ko03013	RNA transport	A09120 Genetic Information Processing	1	255	486	24778	0.993765	0.199935	1.01419

## Sheet: KEGG for down-regulated
Term	Name	MainClass	GeneHitsInSelectedSet	AllGenesInSelectedSet	GeneHitsInBackground	AllGenesInBackground	p-value	enrichFactor	corrected p-value(BH method)
ko00195	Photosynthesis	A09100 Metabolism	25	283	211	24778	0	10.3738	0
ko00710	Carbon fixation in photosynthetic organisms	A09100 Metabolism	20	283	210	24778	4.69402e-13	8.33855	1.36127e-11
ko00010	Glycolysis / Gluconeogenesis	A09100 Metabolism	19	283	314	24778	4.36809e-09	5.2979	9.04818e-08
ko04626	Plant-pathogen interaction	A09150 Organismal Systems	16	283	1048	24778	0.147394	1.33671	0.368484
ko00940	Phenylpropanoid biosynthesis	A09100 Metabolism	14	283	498	24778	0.00189074	2.46138	0.0137079
ko00520	Amino sugar and nucleotide sugar metabolism	A09100 Metabolism	12	283	366	24778	0.0011024	2.87065	0.00841304
ko00860	Porphyrin and chlorophyll metabolism	A09100 Metabolism	10	283	126	24778	1.937e-06	6.94879	3.51081e-05
ko00500	Starch and sucrose metabolism	A09100 Metabolism	10	283	381	24778	0.0126895	2.29803	0.0593541
ko00030	Pentose phosphate pathway	A09100 Metabolism	9	283	155	24778	7.65108e-05	5.08383	0.00100855
ko00250	Alanine, aspartate and glutamate metabolism	A09100 Metabolism	9	283	158	24778	8.86652e-05	4.9873	0.00107137
ko00051	Fructose and mannose metabolism	A09100 Metabolism	9	283	184	24778	0.000279351	4.28257	0.0027004
ko00630	Glyoxylate and dicarboxylate metabolism	A09100 Metabolism	9	283	244	24778	0.0020634	3.22948	0.0142473
ko00270	Cysteine and methionine metabolism	A09100 Metabolism	9	283	323	24778	0.0123699	2.43961	0.0597879
ko00190	Oxidative phosphorylation	A09100 Metabolism	9	283	471	24778	0.0924707	1.67302	0.291484
ko03013	RNA transport	A09120 Genetic Information Processing	8	283	486	24778	0.19396	1.44123	0.43944
ko00062	Fatty acid elongation	A09100 Metabolism	7	283	93	24778	9.65045e-05	6.59014	0.0010764
ko00220	Arginine biosynthesis	A09100 Metabolism	7	283	112	24778	0.000307096	5.47217	0.00278306
ko00330	Arginine and proline metabolism	A09100 Metabolism	7	283	159	24778	0.00240473	3.85461	0.0158493
ko04075	Plant hormone signal transduction	A09130 Environmental Information Processing	7	283	994	24778	0.939563	0.616583	1.15455
ko00040	Pentose and glucuronate interconversions	A09100 Metabolism	6	283	280	24778	0.102828	1.87617	0.304286
ko04145	Phagosome	A09140 Cellular Processes	6	283	286	24778	0.110755	1.83681	0.32119
ko00350	Tyrosine metabolism	A09100 Metabolism	5	283	110	24778	0.00867683	3.97976	0.0465978
ko00071	Fatty acid degradation	A09100 Metabolism	5	283	119	24778	0.0119275	3.67877	0.0617673
ko00053	Ascorbate and aldarate metabolism	A09100 Metabolism	5	283	126	24778	0.0149654	3.4744	0.0678118
ko00460	Cyanoamino acid metabolism	A09100 Metabolism	5	283	164	24778	0.0404177	2.66935	0.150271
ko00561	Glycerolipid metabolism	A09100 Metabolism	5	283	191	24778	0.0686472	2.29201	0.231485
ko00620	Pyruvate metabolism	A09100 Metabolism	5	283	234	24778	0.130986	1.87083	0.351721
ko00196	Photosynthesis - antenna proteins	A09100 Metabolism	4	283	62	24778	0.00552889	5.64869	0.0320675
ko01040	Biosynthesis of unsaturated fatty acids	A09100 Metabolism	4	283	78	24778	0.0122751	4.48999	0.0613753
ko00100	Steroid biosynthesis	A09100 Metabolism	4	283	93	24778	0.022028	3.7658	0.0939431
ko00061	Fatty acid biosynthesis	A09100 Metabolism	4	283	128	24778	0.0594089	2.73609	0.205102
ko00380	Tryptophan metabolism	A09100 Metabolism	4	283	142	24778	0.0801794	2.46633	0.258356
ko04146	Peroxisome	A09140 Cellular Processes	4	283	260	24778	0.345857	1.347	0.668657
ko00564	Glycerophospholipid metabolism	A09100 Metabolism	4	283	264	24778	0.356206	1.32659	0.679603
ko00480	Glutathione metabolism	A09100 Metabolism	4	283	272	24778	0.376893	1.28757	0.700635
ko04016	MAPK signaling pathway - plant	A09130 Environmental Information Processing	4	283	428	24778	0.72295	0.818269	1.04828
ko00903	Limonene and pinene degradation	A09100 Metabolism	3	283	17	24778	0.00089029	15.4508	0.00717178
ko00340	Histidine metabolism	A09100 Metabolism	3	283	59	24778	0.0299756	4.45194	0.124185
ko00950	Isoquinoline alkaloid biosynthesis	A09100 Metabolism	3	283	61	24778	0.0326431	4.30597	0.127926
ko00310	Lysine degradation	A09100 Metabolism	3	283	94	24778	0.092924	2.7943	0.286681
ko00410	beta-Alanine metabolism	A09100 Metabolism	3	283	110	24778	0.131614	2.38786	0.346982
ko00592	alpha-Linolenic acid metabolism	A09100 Metabolism	3	283	116	24778	0.147368	2.26435	0.374884
ko00280	Valine, leucine and isoleucine degradation	A09100 Metabolism	3	283	124	24778	0.169258	2.11826	0.409039
ko00400	Phenylalanine, tyrosine and tryptophan biosynthesis	A09100 Metabolism	3	283	143	24778	0.224431	1.83681	0.485709
ko00970	Aminoacyl-tRNA biosynthesis	A09120 Genetic Information Processing	3	283	163	24778	0.285597	1.61144	0.583261
ko00230	Purine metabolism	A09100 Metabolism	3	283	419	24778	0.859865	0.626884	1.14386
ko04141	Protein processing in endoplasmic reticulum	A09120 Genetic Information Processing	3	283	580	24778	0.963072	0.45287	1.12617
ko00261	Monobactam biosynthesis	A09100 Metabolism	2	283	38	24778	0.0698507	4.60815	0.23019
ko00300	Lysine biosynthesis	A09100 Metabolism	2	283	45	24778	0.0934622	3.89132	0.282334
ko00909	Sesquiterpenoid and triterpenoid biosynthesis	A09100 Metabolism	2	283	52	24778	0.118984	3.36749	0.331783
ko00590	Arachidonic acid metabolism	A09100 Metabolism	2	283	54	24778	0.126565	3.24277	0.346263
ko00290	Valine, leucine and isoleucine biosynthesis	A09100 Metabolism	2	283	66	24778	0.17408	2.65317	0.413796
ko00770	Pantothenate and CoA biosynthesis	A09100 Metabolism	2	283	76	24778	0.215479	2.30407	0.480685
ko00640	Propanoate metabolism	A09100 Metabolism	2	283	93	24778	0.287269	1.8829	0.578527
ko00960	Tropane, piperidine and pyridine alkaloid biosynthesis	A09100 Metabolism	2	283	101	24778	0.320953	1.73376	0.628894
ko00910	Nitrogen metabolism	A09100 Metabolism	2	283	113	24778	0.370669	1.54964	0.698013
ko00920	Sulfur metabolism	A09100 Metabolism	2	283	115	24778	0.378823	1.52269	0.695309
ko00360	Phenylalanine metabolism	A09100 Metabolism	2	283	116	24778	0.382884	1.50957	0.693977
ko00900	Terpenoid backbone biosynthesis	A09100 Metabolism	2	283	152	24778	0.519848	1.15204	0.856568
ko04070	Phosphatidylinositol signaling system	A09130 Environmental Information Processing	2	283	203	24778	0.67636	0.862609	1.01105
ko00260	Glycine, serine and threonine metabolism	A09100 Metabolism	2	283	208	24778	0.68924	0.841873	1.01979
ko03008	Ribosome biogenesis in eukaryotes	A09120 Genetic Information Processing	2	283	254	24778	0.788867	0.689408	1.11054
ko03018	RNA degradation	A09120 Genetic Information Processing	2	283	341	24778	0.90328	0.513518	1.15908
ko04144	Endocytosis	A09140 Cellular Processes	2	283	472	24778	0.972496	0.370995	1.1281
ko03040	Spliceosome	A09120 Genetic Information Processing	2	283	498	24778	0.978753	0.351626	1.10874
ko00902	Monoterpenoid biosynthesis	A09100 Metabolism	1	283	14	24778	0.148591	6.25391	0.365181
ko00660	C5-Branched dibasic acid metabolism	A09100 Metabolism	1	283	27	24778	0.266785	3.24277	0.56888
ko00440	Phosphonate and phosphinate metabolism	A09100 Metabolism	1	283	28	24778	0.275169	3.12696	0.569993
ko00591	Linoleic acid metabolism	A09100 Metabolism	1	283	31	24778	0.29975	2.82435	0.595395
ko00650	Butanoate metabolism	A09100 Metabolism	1	283	52	24778	0.450063	1.68375	0.795842
ko00563	Glycosylphosphatidylinositol (GPI)-anchor biosynthesis	A09100 Metabolism	1	283	52	24778	0.450063	1.68375	0.795842
ko02010	ABC transporters	A09130 Environmental Information Processing	1	283	60	24778	0.498452	1.45925	0.860423
ko00790	Folate biosynthesis	A09100 Metabolism	1	283	63	24778	0.515483	1.38976	0.859138
ko00565	Ether lipid metabolism	A09100 Metabolism	1	283	69	24778	0.547835	1.26891	0.892541
ko00600	Sphingolipid metabolism	A09100 Metabolism	1	283	71	24778	0.558134	1.23317	0.899216
ko00904	Diterpenoid biosynthesis	A09100 Metabolism	1	283	75	24778	0.578035	1.1674	0.921045
ko00073	Cutin, suberine and wax biosynthesis	A09100 Metabolism	1	283	97	24778	0.672553	0.902626	1.01584
ko04712	Circadian rhythm - plant	A09150 Organismal Systems	1	283	110	24778	0.718153	0.795952	1.05184
ko03020	RNA polymerase	A09120 Genetic Information Processing	1	283	118	24778	0.743009	0.74199	1.0667
ko04130	SNARE interactions in vesicular transport	A09120 Genetic Information Processing	1	283	123	24778	0.757421	0.711827	1.07673
ko00052	Galactose metabolism	A09100 Metabolism	1	283	145	24778	0.811851	0.603826	1.12113
ko00562	Inositol phosphate metabolism	A09100 Metabolism	1	283	183	24778	0.878756	0.478441	1.15836
ko00240	Pyrimidine metabolism	A09100 Metabolism	1	283	325	24778	0.976672	0.269399	1.1151
ko03015	mRNA surveillance pathway	A09120 Genetic Information Processing	1	283	378	24778	0.987421	0.231626	1.10135
ko04120	Ubiquitin mediated proteolysis	A09120 Genetic Information Processing	1	283	395	24778	0.989684	0.221658	1.09545
ko03010	Ribosome	A09120 Genetic Information Processing	1	283	1091	24778	0.999997	0.0802519	1.02112
