# Supplementary material for: Overdominance at the Gene Expression Level Plays a Critical Role in the Hybrid Root Growth of Brassica napus
Source: Int J Mol Sci. 2021 Aug 26;22(17):9246. doi: 10.3390/ijms22179246 (PMC8431428; doi:10.3390/ijms22179246)
Supplement: Supplementary file 1 [file ijms-22-09246-s001.zip › ijms-1346590-supplementary/Supplementary Materials/Supplementary file 18 .xlsx]

## Sheet: Galactose metabolism
			O_21	FO_21	F_21	FV_21	V_21	21-FO vs F (log2fc)	21-FO vs O (log2fc)	21-FO vs FV (log2fc)	21-FV vs F (log2fc)	21-FV vs V (log2fc)	O_24	FO_24	F_24	FV_24	V_24	24-FO vs F (log2fc)	24-FO vs O (log2fc)	24-FO vs FV (log2fc)	24-FV vs F (log2fc)	24-FV vs V (log2fc)	A.thaliana Locus	description
	5.1.3.3	BnaC03g57220D	143.751	99.3156	63.868	87.6333	154.974	0.636927	-0.533482	0.180542	0.456385	-0.822472	100.446	111.942	46.0557	81.9831	137.921	1.2813	0.156336	0.449357	0.831947	-0.750443	AT3G47800.1	Galactose mutarotase-like superfamily protein; FUNCTIONS IN: aldose 1-epimerase activity; INVOLVED IN: galactose metabolic process, hexose metabolic process, carbohydrate metabolic process; LOCATED IN: endomembrane system; EXPRESSED IN: 23 plant structures; EXPRESSED DURING: 14 growth stages; CONTAINS InterPro DOMAIN/s: Glycoside hydrolase-type carbohydrate-binding (InterPro:IPR011013), Aldose 1-…
	5.1.3.3	BnaA05g22280D	221.432	231.299	145.138	122.992	185.627	0.672331	0.0628962	0.911197	-0.238866	-0.593845	192.912	227.621	107.64	204.683	221.674	1.08042	0.238692	0.153243	0.927182	-0.115047	AT3G17940.1	Galactose mutarotase-like superfamily protein; FUNCTIONS IN: isomerase activity, carbohydrate binding, aldose 1-epimerase activity, catalytic activity; INVOLVED IN: galactose metabolic process, hexose metabolic process, carbohydrate metabolic process; LOCATED IN: cellular_component unknown; EXPRESSED IN: 25 plant structures; EXPRESSED DURING: 16 growth stages; CONTAINS InterPro DOMAIN/s: Glycosid…
GALE	5.1.3.2	BnaC01g15760D	18.3018	60.6764	7.16615	143.368	302.532	3.08187	1.72915	-1.24052	4.32239	-1.07736	27.4537	45.1409	9.318	172.843	316.607	2.27634	0.717436	-1.93695	4.2133	-0.873231	AT4G23920.1	UDP-D-glucose/UDP-D-galactose 4-epimerase 2 (UGE2); CONTAINS InterPro DOMAIN/s: NAD-dependent epimerase/dehydratase (InterPro:IPR001509), NAD(P)-binding domain (InterPro:IPR016040), UDP-glucose 4-epimerase (InterPro:IPR005886); BEST Arabidopsis thaliana protein match is: UDP-D-glucose/UDP-D-galactose 4-epimerase 5 (TAIR:AT4G10960.1); Has 45788 Blast hits to 45762 proteins in 3004 species: Archae …
		BnaA01g13540D	98.6643	193.432	53.7049	52.8372	92.4171	1.8487	0.971223	1.8722	-0.0235006	-0.806607	103.529	112.949	61.7213	57.8406	87.4838	0.87183	0.125634	0.965515	-0.0936855	-0.596932	AT4G23920.1	UDP-D-glucose/UDP-D-galactose 4-epimerase 2 (UGE2); CONTAINS InterPro DOMAIN/s: NAD-dependent epimerase/dehydratase (InterPro:IPR001509), NAD(P)-binding domain (InterPro:IPR016040), UDP-glucose 4-epimerase (InterPro:IPR005886); BEST Arabidopsis thaliana protein match is: UDP-D-glucose/UDP-D-galactose 4-epimerase 5 (TAIR:AT4G10960.1); Has 45788 Blast hits to 45762 proteins in 3004 species: Archae …
		BnaC08g15730D	1483.24	2465.28	522.462	496.626	1084.7	2.23835	0.732998	2.31152	-0.0731661	-1.12707	1296.83	2039.13	461.842	708.846	1296.12	2.14248	0.652962	1.52441	0.618073	-0.870653	AT1G12780.1	UDP-D-glucose/UDP-D-galactose 4-epimerase 1 (UGE1); FUNCTIONS IN: UDP-glucose 4-epimerase activity, protein dimerization activity; INVOLVED IN: response to stress, galactose biosynthetic process; LOCATED IN: cytosol, plasma membrane; EXPRESSED IN: 32 plant structures; EXPRESSED DURING: 16 growth stages; CONTAINS InterPro DOMAIN/s: NAD-dependent epimerase/dehydratase (InterPro:IPR001509), NAD(P)-b…
		BnaA08g24600D	653.284	1338.34	241.387	281.868	479.045	2.47102	1.03466	2.24735	0.22367	-0.765143	637.008	992.676	189.64	395.993	537.486	2.38806	0.640012	1.32585	1.06221	-0.440754	AT1G12780.1	UDP-D-glucose/UDP-D-galactose 4-epimerase 1 (UGE1); FUNCTIONS IN: UDP-glucose 4-epimerase activity, protein dimerization activity; INVOLVED IN: response to stress, galactose biosynthetic process; LOCATED IN: cytosol, plasma membrane; EXPRESSED IN: 32 plant structures; EXPRESSED DURING: 16 growth stages; CONTAINS InterPro DOMAIN/s: NAD-dependent epimerase/dehydratase (InterPro:IPR001509), NAD(P)-b…
		BnaC05g49280D	1555.33	2804.45	463.963	196.026	1217.63	2.59563	0.850494	3.8386	-1.24296	-2.63496	1372.33	2277.75	451.394	549.29	1426.85	2.33515	0.730977	2.05197	0.28318	-1.37719	AT1G12780.1	UDP-D-glucose/UDP-D-galactose 4-epimerase 1 (UGE1); FUNCTIONS IN: UDP-glucose 4-epimerase activity, protein dimerization activity; INVOLVED IN: response to stress, galactose biosynthetic process; LOCATED IN: cytosol, plasma membrane; EXPRESSED IN: 32 plant structures; EXPRESSED DURING: 16 growth stages; CONTAINS InterPro DOMAIN/s: NAD-dependent epimerase/dehydratase (InterPro:IPR001509), NAD(P)-b…
GOLS2	2.4.1.123	BnaC09g14710D	435.76	521.917	182.825	151.482	401.621	1.51336	0.260285	1.78467	-0.271319	-1.40669	354.493	428.906	78.9097	246.176	714.185	2.44239	0.274905	0.800972	1.64142	-1.53661	AT1G60470.1	galactinol synthase 4 (GolS4); CONTAINS InterPro DOMAIN/s: Glycosyl transferase, family 8 (InterPro:IPR002495); BEST Arabidopsis thaliana protein match is: galactinol synthase 7 (TAIR:AT1G60450.1); Has 1247 Blast hits to 1246 proteins in 290 species: Archae - 0; Bacteria - 113; Metazoa - 260; Fungi - 270; Plants - 469; Viruses - 69; Other Eukaryotes - 66 (source: NCBI BLink).
lacZ	3.2.1.23	BnaC04g27780D	1858.23	3565.02	230.301	327.667	1699.54	3.95232	0.93998	3.44361	0.508708	-2.37484	1095.89	3126.32	227.051	481.355	1750.36	3.78338	1.51236	2.69929	1.08408	-1.86248	AT3G52840.1	beta-galactosidase 2 (BGAL2); FUNCTIONS IN: cation binding, beta-galactosidase activity, hydrolase activity, hydrolyzing O-glycosyl compounds, catalytic activity; INVOLVED IN: lactose catabolic process, using glucoside 3-dehydrogenase, carbohydrate metabolic process, lactose catabolic process via UDP-galactose, lactose catabolic process; LOCATED IN: apoplast; EXPRESSED IN: 26 plant structures; EX…
RS6	2.4.1.82	BnaA10g15160D	340.144	1048.73	37.6644	76.7003	112.229	4.79929	1.62442	3.77326	1.02603	-0.549145	184.388	295.431	63.5081	105.602	107.189	2.21781	0.680079	1.48419	0.733617	-0.0215312	AT5G20250.4	DARK INDUCIBLE 10 (DIN10); CONTAINS InterPro DOMAIN/s: Glycoside hydrolase, catalytic core (InterPro:IPR017853), Raffinose synthase (InterPro:IPR008811); BEST Arabidopsis thaliana protein match is: seed imbibition 2 (TAIR:AT3G57520.1).
		BnaA02g04780D	3502.02	7396.81	734.553	424.751	1591.39	3.33196	1.07872	4.12222	-0.79025	-1.9056	1885.2	6638.08	694.205	815.409	2665.48	3.25733	1.81605	3.02517	0.232164	-1.7088	AT5G20250.4	DARK INDUCIBLE 10 (DIN10); CONTAINS InterPro DOMAIN/s: Glycoside hydrolase, catalytic core (InterPro:IPR017853), Raffinose synthase (InterPro:IPR008811); BEST Arabidopsis thaliana protein match is: seed imbibition 2 (TAIR:AT3G57520.1).
		BnaC09g37510D	74.0914	486.688	24.5271	41.5494	188.777	4.31055	2.71562	3.5501	0.760448	-2.18379	66.7319	200.334	37.1262	59.9291	187.253	2.4319	1.58596	1.74108	0.69082	-1.64366	AT5G20250.4	DARK INDUCIBLE 10 (DIN10); CONTAINS InterPro DOMAIN/s: Glycoside hydrolase, catalytic core (InterPro:IPR017853), Raffinose synthase (InterPro:IPR008811); BEST Arabidopsis thaliana protein match is: seed imbibition 2 (TAIR:AT3G57520.1).
		BnaC09g37530D	3467.06	7018.01	765.786	704.153	4238.76	3.19605	1.01735	3.3171	-0.121053	-2.58968	2036.99	3732.28	896.786	682.375	4229.27	2.05722	0.873619	2.45142	-0.394198	-2.63177	AT5G20250.4	DARK INDUCIBLE 10 (DIN10); CONTAINS InterPro DOMAIN/s: Glycoside hydrolase, catalytic core (InterPro:IPR017853), Raffinose synthase (InterPro:IPR008811); BEST Arabidopsis thaliana protein match is: seed imbibition 2 (TAIR:AT3G57520.1).
	2.4.1.82	BnaC08g28500D	5172.97	7161.75	1438.11	1364.95	3094.73	2.31614	0.46932	2.39146	-0.0753191	-1.18096	3104.26	4536.03	1591.87	2346.45	4836.79	1.51071	0.547182	0.950952	0.559759	-1.04357	AT3G57520.1	seed imbibition 2 (SIP2); CONTAINS InterPro DOMAIN/s: Glycoside hydrolase, catalytic core (InterPro:IPR017853), Raffinose synthase (InterPro:IPR008811); BEST Arabidopsis thaliana protein match is: seed imbibition 1 (TAIR:AT1G55740.1); Has 528 Blast hits to 504 proteins in 147 species: Archae - 29; Bacteria - 95; Metazoa - 0; Fungi - 82; Plants - 312; Viruses - 0; Other Eukaryotes - 10 (source: NC…
		BnaA09g36810D	6970.45	13099.8	2004.23	1520.53	3534.15	2.70842	0.910222	3.1069	-0.398479	-1.21679	4759.92	8392.4	2339.39	2710.44	4963.63	1.84295	0.818145	1.63055	0.2124	-0.872866	AT3G57520.1	seed imbibition 2 (SIP2); CONTAINS InterPro DOMAIN/s: Glycoside hydrolase, catalytic core (InterPro:IPR017853), Raffinose synthase (InterPro:IPR008811); BEST Arabidopsis thaliana protein match is: seed imbibition 1 (TAIR:AT1G55740.1); Has 528 Blast hits to 504 proteins in 147 species: Archae - 29; Bacteria - 95; Metazoa - 0; Fungi - 82; Plants - 312; Viruses - 0; Other Eukaryotes - 10 (source: NC…
AGAL2	3.2.1.22	BnaC03g03520D	108.19	171.612	42.9571	41.9704	87.0079	1.99818	0.665588	2.03171	-0.0335251	-1.05177	93.7287	130.726	49.6712	68.9529	109.444	1.39606	0.479983	0.922862	0.473202	-0.666508	AT5G08370.1	alpha-galactosidase 2 (AGAL2); FUNCTIONS IN: alpha-galactosidase activity, hydrolase activity, hydrolyzing O-glycosyl compounds, catalytic activity; INVOLVED IN: positive regulation of flower development, leaf morphogenesis; LOCATED IN: plant-type cell wall; EXPRESSED IN: 22 plant structures; EXPRESSED DURING: 13 growth stages; CONTAINS InterPro DOMAIN/s: Aldolase-type TIM barrel (InterPro:IPR013…
UTP:galactose-1-phosphate uridylyltransferases	2.7.7.10	BnaA10g16640D	149.302	119.673	51.5941	36.709	70.337	1.21382	-0.319134	1.70489	-0.491074	-0.938151	156.866	101.103	45.4157	48.1494	42.1646	1.15456	-0.633704	1.07024	0.084327	1.14194	AT5G18200.1	UTP:galactose-1-phosphate uridylyltransferases;ribose-5-phosphate adenylyltransferases; CONTAINS InterPro DOMAIN/s: Galactose-1-phosphate uridyl transferase, N-terminal (InterPro:IPR005849), Histidine triad-like motif (InterPro:IPR011146), Galactose-1-phosphate uridyl transferase, class I (InterPro:IPR001937), Histidine triad motif (InterPro:IPR011151); Has 1807 Blast hits to 1807 proteins in 277…
																									FVvs V
																									0.191484

## Sheet: Starch and sucrose metabolism
		O_21	FO_21	F_21	FV_21	V_21	21-FO vs F (log2fc)	21-FO vs O (log2fc)	21-FO vs FV (log2fc)	21-FV vs F (log2fc)	21-FV vs V (log2fc)	O_24	FO_24	F_24	FV_24	V_24	24-FO vs F (log2fc)	24-FO vs O (log2fc)	24-FO vs FV (log2fc)	24-FV vs F (log2fc)	24-FV vs V (log2fc)	A.thaliana Locus	description
VACUOLAR INVERTASE 1	BnaC09g13230D	2299.76	4434.96	766.76	499.83	1777.06	2.53207	0.947438	3.14941	-0.617338	-1.82998	856.13	2098.33	524.88	852.1	1828.22	1.99918	1.29334	1.30015	0.699035	-1.10135	AT1G62660.1	Glycosyl hydrolases family 32 protein; FUNCTIONS IN: hydrolase activity, hydrolyzing O-glycosyl compounds; INVOLVED IN: sucrose catabolic process, using beta-fructofuranosidase, carbohydrate metabolic process; LOCATED IN: vacuole; EXPRESSED IN: 23 plant structures; EXPRESSED DURING: 12 growth stages; CONTAINS InterPro DOMAIN/s: Protein of unknown function DUF3357 (InterPro:IPR021792), Glycoside h…
VACUOLAR INVERTASE 1	BnaA09g12880D	4200	7803.48	2756.99	1349.53	3204.51	1.50102	0.893728	2.53166	-1.03064	-1.24765	2341.39	4286.99	2182.96	1917.15	3271.74	0.973679	0.8726	1.161	-0.187322	-0.771095	AT1G62660.1	Glycosyl hydrolases family 32 protein; FUNCTIONS IN: hydrolase activity, hydrolyzing O-glycosyl compounds; INVOLVED IN: sucrose catabolic process, using beta-fructofuranosidase, carbohydrate metabolic process; LOCATED IN: vacuole; EXPRESSED IN: 23 plant structures; EXPRESSED DURING: 12 growth stages; CONTAINS InterPro DOMAIN/s: Protein of unknown function DUF3357 (InterPro:IPR021792), Glycoside h…
VACUOLAR INVERTASE 1	BnaA09g10560D	98.71	177.17	89.79	111.4	0.39	0.980508	0.843866	0.669385	0.311123	8.15806	216.46	184.32	49.3	58.55	0.67	1.90255	-0.231888	1.65447	0.248082	6.44936	AT1G62660.1	Glycosyl hydrolases family 32 protein; FUNCTIONS IN: hydrolase activity, hydrolyzing O-glycosyl compounds; INVOLVED IN: sucrose catabolic process, using beta-fructofuranosidase, carbohydrate metabolic process; LOCATED IN: vacuole; EXPRESSED IN: 23 plant structures; EXPRESSED DURING: 12 growth stages; CONTAINS InterPro DOMAIN/s: Protein of unknown function DUF3357 (InterPro:IPR021792), Glycoside h…
VACUOLAR INVERTASE 1	BnaA09g10570D	13.22	21.21	9.31	14.74	0	1.18789	0.682022	0.525008	0.662883	N/A	6.86	8.02	13.76	2.43	12.65	-0.778806	0.225394	1.72265	-2.50145	-2.38011	AT1G62660.1	Glycosyl hydrolases family 32 protein; FUNCTIONS IN: hydrolase activity, hydrolyzing O-glycosyl compounds; INVOLVED IN: sucrose catabolic process, using beta-fructofuranosidase, carbohydrate metabolic process; LOCATED IN: vacuole; EXPRESSED IN: 23 plant structures; EXPRESSED DURING: 12 growth stages; CONTAINS InterPro DOMAIN/s: Protein of unknown function DUF3357 (InterPro:IPR021792), Glycoside h…
SUS3	BnaA09g00710D	8.19	67.76	0	106.01	9.81	N/A	3.0485	-0.645695	N/A	3.4338	5.49	12.92	1.52	17.77	10.94	3.08746	1.23473	-0.459838	3.5473	0.699831	AT4G02280.1	sucrose synthase 3 (SUS3); CONTAINS InterPro DOMAIN/s: Sucrose synthase, plant/cyanobacteria (InterPro:IPR012820), Sucrose synthase (InterPro:IPR000368), Glycosyl transferase, group 1 (InterPro:IPR001296); BEST Arabidopsis thaliana protein match is: sucrose synthase 2 (TAIR:AT5G49190.1); Has 6506 Blast hits to 6505 proteins in 1621 species: Archae - 256; Bacteria - 4351; Metazoa - 95; Fungi - 50;…
SUS5	BnaC06g12120D	203.92	270.86	164.17	245.7	267.87	0.722357	0.409544	0.140649	0.581707	-0.124635	204.63	256.56	107.29	211.49	209.74	1.25778	0.326279	0.278707	0.979074	0.0119874	AT5G37180.1	sucrose synthase 5 (SUS5); CONTAINS InterPro DOMAIN/s: Sucrose synthase, plant/cyanobacteria (InterPro:IPR012820), Sucrose synthase (InterPro:IPR000368), Glycosyl transferase, group 1 (InterPro:IPR001296); BEST Arabidopsis thaliana protein match is: sucrose synthase 6 (TAIR:AT1G73370.1); Has 35333 Blast hits to 34131 proteins in 2444 species: Archae - 798; Bacteria - 22429; Metazoa - 974; Fungi -…
SPS4F	BnaA02g23460D	397.39	651.71	294.98	139.17	391.84	1.14361	0.713675	2.22738	-1.08377	-1.49342	310.02	538.6	475.87	218.19	297.87	0.178647	0.796853	1.30363	-1.12498	-0.449098	AT4G10120.2	ATSPS4F; FUNCTIONS IN: transferase activity, transferring glycosyl groups; INVOLVED IN: biosynthetic process, sucrose metabolic process; LOCATED IN: plasma membrane; EXPRESSED IN: 19 plant structures; EXPRESSED DURING: 10 growth stages; CONTAINS InterPro DOMAIN/s: Sucrose-phosphate synthase (InterPro:IPR006380), Sucrose synthase (InterPro:IPR000368), Sucrose phosphate synthase, plant (InterPro:IP…
SPP	BnaC08g25100D	40.75	22.6	42.78	47.17	13.91	-0.920614	-0.850477	-1.06155	0.140933	1.76175	51.38	40.14	51.65	22.74	23.71	-0.363728	-0.356166	0.819808	-1.18354	-0.0602634	AT3G54270.1	sucrose-6F-phosphate phosphohydrolase family protein; FUNCTIONS IN: phosphatase activity, magnesium ion binding, sucrose-phosphatase activity, catalytic activity; INVOLVED IN: sucrose biosynthetic process, metabolic process; EXPRESSED IN: 7 plant structures; EXPRESSED DURING: petal differentiation and expansion stage, E expanded cotyledon stage, D bilateral stage; CONTAINS InterPro DOMAIN/s: Sucr…
BGLU3	BnaC07g22990D	8.31	21.97	1.38	12.39	60.28	3.99279	1.40261	0.826359	3.16644	-2.2825	15.9	27.99	1.59	24.58	87.51	4.13781	0.815885	0.187427	3.95039	-1.83196	AT4G22100.1	beta glucosidase 2 (BGLU3); FUNCTIONS IN: cation binding, hydrolase activity, hydrolyzing O-glycosyl compounds, catalytic activity; INVOLVED IN: carbohydrate metabolic process; LOCATED IN: endomembrane system; CONTAINS InterPro DOMAIN/s: Glycoside hydrolase, family 1 (InterPro:IPR001360), Glycoside hydrolase, family 1, active site (InterPro:IPR018120), Glycoside hydrolase, catalytic core (InterPr…
BGLU3	BnaA04g29560D	7.65	20.98	2.96	1.45	40.42	2.82535	1.45548	3.85489	-1.02954	-4.80094	22.61	39.12	10.21	10.26	28.75	1.93792	0.790945	1.93088	0.00704786	-1.48653	AT4G22100.1	beta glucosidase 2 (BGLU3); FUNCTIONS IN: cation binding, hydrolase activity, hydrolyzing O-glycosyl compounds, catalytic activity; INVOLVED IN: carbohydrate metabolic process; LOCATED IN: endomembrane system; CONTAINS InterPro DOMAIN/s: Glycoside hydrolase, family 1 (InterPro:IPR001360), Glycoside hydrolase, family 1, active site (InterPro:IPR018120), Glycoside hydrolase, catalytic core (InterPr…
BGLU13	BnaA09g14750D	4.4	10.92	0	0.36	0	N/A	1.3114	4.92283	N/A	N/A	11.66	5.05	0	0.54	0	N/A	-1.20721	3.22525	N/A	N/A	AT5G44640.1	beta glucosidase 13 (BGLU13); FUNCTIONS IN: cation binding, hydrolase activity, hydrolyzing O-glycosyl compounds, catalytic activity; INVOLVED IN: carbohydrate metabolic process; LOCATED IN: endomembrane system; CONTAINS InterPro DOMAIN/s: Glycoside hydrolase, family 1 (InterPro:IPR001360), Glycoside hydrolase, family 1, active site (InterPro:IPR018120), Glycoside hydrolase, catalytic core (Inter…
BGLU13	BnaC04g03730D	15.74	12.38	5.01	8.58	23.72	1.30513	-0.346424	0.528962	0.776167	-1.46705	8.45	22.06	3.27	12.4	28.82	2.75407	1.38441	0.831093	1.92298	-1.21673	AT5G44640.1	beta glucosidase 13 (BGLU13); FUNCTIONS IN: cation binding, hydrolase activity, hydrolyzing O-glycosyl compounds, catalytic activity; INVOLVED IN: carbohydrate metabolic process; LOCATED IN: endomembrane system; CONTAINS InterPro DOMAIN/s: Glycoside hydrolase, family 1 (InterPro:IPR001360), Glycoside hydrolase, family 1, active site (InterPro:IPR018120), Glycoside hydrolase, catalytic core (Inter…
BGLU29	BnaC04g03760D	42.74	55.2	0	20.35	16.64	N/A	0.369081	1.43964	N/A	0.290373	65.46	28.67	0	13.23	22.46	N/A	-1.19107	1.11573	N/A	-0.763545	AT2G44470.3	beta glucosidase 29 (BGLU29); FUNCTIONS IN: cation binding, hydrolase activity, hydrolyzing O-glycosyl compounds, catalytic activity; INVOLVED IN: carbohydrate metabolic process; LOCATED IN: endomembrane system; CONTAINS InterPro DOMAIN/s: Glycoside hydrolase, family 1 (InterPro:IPR001360), Glycoside hydrolase, family 1, active site (InterPro:IPR018120), Glycoside hydrolase, catalytic core (Inter…
BGLU29	BnaC03g43570D	447.03	771.67	139.9	111.4	210.66	2.46359	0.787612	2.79223	-0.328647	-0.919167	291.84	655.3	130.58	195.52	331.85	2.32722	1.16698	1.74484	0.582382	-0.763215	AT3G23920.1	beta-amylase 1 (BAM1); FUNCTIONS IN: beta-amylase activity; INVOLVED IN: response to water deprivation, starch catabolic process; LOCATED IN: cytosol, nucleus; EXPRESSED IN: 25 plant structures; EXPRESSED DURING: 15 growth stages; CONTAINS InterPro DOMAIN/s: Glycoside hydrolase, family 14, conserved site (InterPro:IPR018238), Glycoside hydrolase, family 14 (InterPro:IPR001554), Glycoside hydrolas…
BGLU40	BnaA08g19770D	44.82	38.25	12.3	30.58	6.58	1.6368	-0.228683	0.322871	1.31393	2.21643	65.83	35.24	32.86	54.93	30.13	0.100881	-0.901531	-0.64038	0.741262	0.866394	AT1G26560.1	beta glucosidase 40 (BGLU40); FUNCTIONS IN: cation binding, hydrolase activity, hydrolyzing O-glycosyl compounds, catalytic activity; INVOLVED IN: carbohydrate metabolic process; LOCATED IN: apoplast, chloroplast; EXPRESSED IN: 23 plant structures; EXPRESSED DURING: 13 growth stages; CONTAINS InterPro DOMAIN/s: Glycoside hydrolase, family 1 (InterPro:IPR001360), Glycoside hydrolase, family 1, act…
HKL1	BnaA06g02800D	458.09	325.62	429.78	332.87	187.24	-0.400409	-0.492442	-0.0317695	-0.368639	0.83007	465.4	783.99	224.78	406.1	960.85	1.80232	0.752364	0.949	0.853321	-1.24248	AT1G50460.1	hexokinase-like 1 (HKL1); FUNCTIONS IN: hexokinase activity, ATP binding; INVOLVED IN: response to salt stress, response to cold, response to osmotic stress; LOCATED IN: mitochondrion, plastid; EXPRESSED IN: 26 plant structures; EXPRESSED DURING: 13 growth stages; CONTAINS InterPro DOMAIN/s: Hexokinase, N-terminal (InterPro:IPR022672), Hexokinase, C-terminal (InterPro:IPR022673), Hexokinase (Inte…
APL3	BnaC07g47330D	63.83	90.21	37.75	40.65	125.02	1.25681	0.499053	1.15003	0.106779	-1.62083	76.3	96.23	30.64	72.15	80.02	1.65107	0.334804	0.415487	1.23558	-0.149361	AT4G39210.1	APL3; CONTAINS InterPro DOMAIN/s: Glucose-1-phosphate adenylyltransferase (InterPro:IPR011831), ADP-glucose pyrophosphorylase, conserved site (InterPro:IPR005836), Nucleotidyl transferase (InterPro:IPR005835); BEST Arabidopsis thaliana protein match is: Glucose-1-phosphate adenylyltransferase family protein (TAIR:AT2G21590.2); Has 8453 Blast hits to 8443 proteins in 1715 species: Archae - 406; Ba…
BAM4	BnaC03g14120D	182.86	246.77	110.65	128.18	164	1.15716	0.432427	0.944996	0.212168	-0.355525	123.36	219.21	90.95	141.96	148.08	1.26917	0.829439	0.626829	0.642339	-0.0608923	AT5G55700.1	beta-amylase 4 (BAM4); CONTAINS InterPro DOMAIN/s: Glycoside hydrolase, family 14 (InterPro:IPR001554), Glycoside hydrolase, catalytic core (InterPro:IPR017853), Glycoside hydrolase, family 14B, plant (InterPro:IPR001371), Glycoside hydrolase, subgroup, catalytic core (InterPro:IPR013781); BEST Arabidopsis thaliana protein match is: chloroplast beta-amylase (TAIR:AT4G17090.1); Has 805 Blast hits …
BAM4	BnaA02g08900D	221.34	384.36	96.47	122.23	219.91	1.99431	0.796194	1.65286	0.341446	-0.847315	182.89	278.6	105.4	194.4	217.65	1.40232	0.607219	0.519167	0.883153	-0.162982	AT5G55700.1	beta-amylase 4 (BAM4); CONTAINS InterPro DOMAIN/s: Glycoside hydrolase, family 14 (InterPro:IPR001554), Glycoside hydrolase, catalytic core (InterPro:IPR017853), Glycoside hydrolase, family 14B, plant (InterPro:IPR001371), Glycoside hydrolase, subgroup, catalytic core (InterPro:IPR013781); BEST Arabidopsis thaliana protein match is: chloroplast beta-amylase (TAIR:AT4G17090.1); Has 805 Blast hits …
BAM3	BnaC01g21190D	102.18	165	38.22	14.13	78	2.11007	0.691353	3.54563	-1.43557	-2.46471	100.57	189.46	40.66	50.59	174.15	2.22021	0.913693	1.90497	0.315242	-1.78341	AT4G17090.1	chloroplast beta-amylase (CT-BMY); CONTAINS InterPro DOMAIN/s: Glycoside hydrolase, family 14, conserved site (InterPro:IPR018238), Glycoside hydrolase, family 14 (InterPro:IPR001554), Glycoside hydrolase, catalytic core (InterPro:IPR017853), Glycoside hydrolase, family 14B, plant (InterPro:IPR001371), Glycoside hydrolase, subgroup, catalytic core (InterPro:IPR013781); BEST Arabidopsis thaliana p…
TPS1 15	BnaA07g34230D	437.19	403.01	492.54	833.24	261.7	-0.289425	-0.117445	-1.04792	0.758491	1.67082	445.01	394.56	596.86	792.26	387.96	-0.597148	-0.173593	-1.00573	0.408581	1.03007	AT1G78580.1	trehalose-6-phosphate synthase (TPS1); CONTAINS InterPro DOMAIN/s: Alpha,alpha-trehalose-phosphate synthase (InterPro:IPR012766), Glycosyl transferase, family 20 (InterPro:IPR001830), Trehalose-phosphatase (InterPro:IPR003337); BEST Arabidopsis thaliana protein match is: trehalose-phosphatase/synthase 2 (TAIR:AT1G16980.1); Has 6189 Blast hits to 3807 proteins in 1021 species: Archae - 45; Bacteri…
TPS1	BnaC06g39000D	494.67	405.92	787.91	1091.12	469.49	-0.956835	-0.285271	-1.42654	0.469707	1.21664	390.96	311.92	610.09	822.43	313.44	-0.967846	-0.325845	-1.39872	0.430871	1.3917	AT1G78580.1	trehalose-6-phosphate synthase (TPS1); CONTAINS InterPro DOMAIN/s: Alpha,alpha-trehalose-phosphate synthase (InterPro:IPR012766), Glycosyl transferase, family 20 (InterPro:IPR001830), Trehalose-phosphatase (InterPro:IPR003337); BEST Arabidopsis thaliana protein match is: trehalose-phosphatase/synthase 2 (TAIR:AT1G16980.1); Has 6189 Blast hits to 3807 proteins in 1021 species: Archae - 45; Bacteri…
TPS8	BnaA02g14790D	2609.59	3822.86	1715.03	2164.7	2835.31	1.15642	0.550829	0.820485	0.335933	-0.389339	2318.32	3247.86	1595.49	1862.35	2798.01	1.02549	0.48641	0.802365	0.223125	-0.587277	AT1G70290.1	trehalose-6-phosphatase synthase S8 (TPS8); FUNCTIONS IN: transferase activity, transferring glycosyl groups; INVOLVED IN: trehalose biosynthetic process, metabolic process; EXPRESSED IN: 26 plant structures; EXPRESSED DURING: 13 growth stages; CONTAINS InterPro DOMAIN/s: HAD-superfamily hydrolase, subfamily IIB (InterPro:IPR006379), Glycosyl transferase, family 20 (InterPro:IPR001830), Trehalose…
TPS8	BnaC02g19750D	3143.53	3692.69	1682.28	1619.37	2926.49	1.13425	0.232287	1.18924	-0.0549852	-0.853739	2697.67	2908.6	1652.42	1720.32	2821.53	0.815744	0.108611	0.757648	0.0580965	-0.713801	AT1G70290.1	trehalose-6-phosphatase synthase S8 (TPS8); FUNCTIONS IN: transferase activity, transferring glycosyl groups; INVOLVED IN: trehalose biosynthetic process, metabolic process; EXPRESSED IN: 26 plant structures; EXPRESSED DURING: 13 growth stages; CONTAINS InterPro DOMAIN/s: HAD-superfamily hydrolase, subfamily IIB (InterPro:IPR006379), Glycosyl transferase, family 20 (InterPro:IPR001830), Trehalose…
TPS9 15/12	BnaA08g20280D	12331.5	14573	4191.18	3701.88	3491.49	1.79787	0.240956	1.97697	-0.179098	0.0844153	8410.97	9709.92	3903.79	4921.18	2772.07	1.31458	0.207187	0.980455	0.334129	0.828041	AT1G23870.1	trehalose-phosphatase/synthase 9 (TPS9); FUNCTIONS IN: transferase activity, transferring glycosyl groups, trehalose-phosphatase activity; INVOLVED IN: trehalose biosynthetic process, metabolic process; EXPRESSED IN: 27 plant structures; EXPRESSED DURING: 15 growth stages; CONTAINS InterPro DOMAIN/s: HAD-superfamily hydrolase, subfamily IIB (InterPro:IPR006379), Glycosyl transferase, family 20 (I…
TPS9	BnaC08g06450D	14547.7	18663.3	4446.19	6932.11	12681.1	2.06957	0.35942	1.42884	0.640725	-0.87131	9296.91	10919.7	3809.94	8207.1	10289.9	1.51909	0.232106	0.411985	1.1071	-0.326279	AT1G23870.1	trehalose-phosphatase/synthase 9 (TPS9); FUNCTIONS IN: transferase activity, transferring glycosyl groups, trehalose-phosphatase activity; INVOLVED IN: trehalose biosynthetic process, metabolic process; EXPRESSED IN: 27 plant structures; EXPRESSED DURING: 15 growth stages; CONTAINS InterPro DOMAIN/s: HAD-superfamily hydrolase, subfamily IIB (InterPro:IPR006379), Glycosyl transferase, family 20 (I…
TPS11	BnaA09g09720D	2105.33	2973.39	928.86	694.91	1602.63	1.67858	0.498062	2.09721	-0.418635	-1.20554	1987.08	1966.56	585.86	945.71	1772.53	1.74705	-0.0149758	1.0562	0.690842	-0.90634	AT2G18700.1	trehalose phosphatase/synthase 11 (TPS11); FUNCTIONS IN: transferase activity, transferring glycosyl groups; INVOLVED IN: trehalose biosynthetic process, metabolic process; LOCATED IN: mitochondrion; EXPRESSED IN: 27 plant structures; EXPRESSED DURING: 15 growth stages; CONTAINS InterPro DOMAIN/s: HAD-superfamily hydrolase, subfamily IIB (InterPro:IPR006379), Glycosyl transferase, family 20 (Inte…
TPS11	BnaC09g51060D	2782.82	3758.67	1145.14	941.42	2426.41	1.7147	0.433675	1.99731	-0.282614	-1.36591	2387.92	2296.38	809.83	1018.08	2612.85	1.50367	-0.0563931	1.17351	0.33016	-1.35977	AT2G18700.1	trehalose phosphatase/synthase 11 (TPS11); FUNCTIONS IN: transferase activity, transferring glycosyl groups; INVOLVED IN: trehalose biosynthetic process, metabolic process; LOCATED IN: mitochondrion; EXPRESSED IN: 27 plant structures; EXPRESSED DURING: 15 growth stages; CONTAINS InterPro DOMAIN/s: HAD-superfamily hydrolase, subfamily IIB (InterPro:IPR006379), Glycosyl transferase, family 20 (Inte…
ATTPPA 12	BnaAnng22210D	313.7	181.06	158.18	396.75	103.58	0.194901	-0.792918	-1.13176	1.32666	1.93748	193.84	329.07	352.08	199.32	198.43	-0.0975088	0.763528	0.723308	-0.820817	0.00645632	AT5G51460.2	ATTPPA; FUNCTIONS IN: trehalose-phosphatase activity; INVOLVED IN: trehalose biosynthetic process; LOCATED IN: chloroplast; EXPRESSED IN: 23 plant structures; EXPRESSED DURING: 16 growth stages; CONTAINS InterPro DOMAIN/s: HAD-superfamily hydrolase, subfamily IIB (InterPro:IPR006379), Trehalose-phosphatase (InterPro:IPR003337); BEST Arabidopsis thaliana protein match is: Haloacid dehalogenase-lik…
TPPB	BnaA07g33960D	234.72	63.83	249.15	679.53	62.96	-1.96471	-1.87863	-3.41223	1.44752	3.43203	398.47	742.54	288.39	182.25	67.17	1.36445	0.897998	2.02655	-0.662102	1.44003	AT1G78090.1	trehalose-6-phosphate phosphatase (TPPB); CONTAINS InterPro DOMAIN/s: HAD-superfamily hydrolase, subfamily IIB (InterPro:IPR006379), Trehalose-phosphatase (InterPro:IPR003337); BEST Arabidopsis thaliana protein match is: Haloacid dehalogenase-like hydrolase (HAD) superfamily protein (TAIR:AT1G22210.1); Has 2381 Blast hits to 2375 proteins in 857 species: Archae - 41; Bacteria - 1374; Metazoa - 22…
TPPB	BnaC06g38600D	205.53	110.16	542.39	691.93	76.66	-2.29973	-0.899749	-2.65103	0.351296	3.17408	550.08	1064.57	813.18	438.62	138.17	0.388624	0.952557	1.27923	-0.890603	1.66653	AT1G78090.1	trehalose-6-phosphate phosphatase (TPPB); CONTAINS InterPro DOMAIN/s: HAD-superfamily hydrolase, subfamily IIB (InterPro:IPR006379), Trehalose-phosphatase (InterPro:IPR003337); BEST Arabidopsis thaliana protein match is: Haloacid dehalogenase-like hydrolase (HAD) superfamily protein (TAIR:AT1G22210.1); Has 2381 Blast hits to 2375 proteins in 857 species: Archae - 41; Bacteria - 1374; Metazoa - 22…
TRE1	BnaC07g38690D	750.88	1478.1	88.49	112.08	615.22	4.06209	0.97709	3.72114	0.340943	-2.45657	208.15	774.49	118.52	186.57	348.3	2.70812	1.89562	2.05353	0.654586	-0.900613	AT4G24040.1	trehalase 1 (TRE1); CONTAINS InterPro DOMAIN/s: Glycoside hydrolase, family 37 (InterPro:IPR001661), Six-hairpin glycosidase-like (InterPro:IPR008928), Glycoside hydrolase, family 37, conserved site (InterPro:IPR018232); Has 1925 Blast hits to 1909 proteins in 569 species: Archae - 2; Bacteria - 1056; Metazoa - 507; Fungi - 235; Plants - 71; Viruses - 0; Other Eukaryotes - 54 (source: NCBI BLink).
TRE1	BnaA03g46430D	42.86	68.3	0.33	1.24	28.87	7.69328	0.672254	5.78347	1.9098	-4.54116	6.46	39.13	13.92	15.05	11.06	1.49112	2.59867	1.37851	0.112604	0.444412	AT4G24040.1	trehalase 1 (TRE1); CONTAINS InterPro DOMAIN/s: Glycoside hydrolase, family 37 (InterPro:IPR001661), Six-hairpin glycosidase-like (InterPro:IPR008928), Glycoside hydrolase, family 37, conserved site (InterPro:IPR018232); Has 1925 Blast hits to 1909 proteins in 569 species: Archae - 2; Bacteria - 1056; Metazoa - 507; Fungi - 235; Plants - 71; Viruses - 0; Other Eukaryotes - 54 (source: NCBI BLink).
