# Supplementary material for: Overdominance at the Gene Expression Level Plays a Critical Role in the Hybrid Root Growth of Brassica napus
Source: Int J Mol Sci. 2021 Aug 26;22(17):9246. doi: 10.3390/ijms22179246 (PMC8431428; doi:10.3390/ijms22179246)
Supplement: Supplementary file 1 [file ijms-22-09246-s001.zip › ijms-1346590-supplementary/Supplementary Materials/Supplementary file 19.xlsx]

## Sheet: Plant hormone signal
			21_O	21_FO	21_F	21_FV	21_V	21-FO vs F (log2fc)	21-FO vs O (log2fc)	21-FO vs FV (log2fc)	21-FV vs F (log2fc)	21-FV vs V (log2fc)	24_O	24_FO	24_F	24_FV	24_V		24-FO vs F (log2fc)	24-FO vs O (log2fc)	24-FO vs FV (log2fc)	24-FV vs F (log2fc)	24-FV vs V (log2fc)	A.thaliana Locus	description
AUXIN	TIR1	BnaA07g19520D	385.754	337.028	99.3849	143.551	345.585	1.76177	-0.194812	1.23131	0.530462	-1.26748	247.178	344.986	103.903	111.192	249.235	3.32027	1.7313	0.480991	1.63349	0.0978136	-1.16446	AT3G62980.1	TRANSPORT INHIBITOR RESPONSE 1 (TIR1); CONTAINS InterPro DOMAIN/s: F-box domain, cyclin-like (InterPro:IPR001810), F-box domain, Skp2-like (InterPro:IPR022364); BEST Arabidopsis thaliana protein match is: GRR1-like protein 1 (TAIR:AT4G03190.1); Has 30201 Blast hits to 17322 proteins in 780 species: Archae - 12; Bacteria - 1396; Metazoa - 17338; Fungi - 3422; Plants - 5037; Viruses - 0; Other Euka…
	IAA2	BnaC05g29330D	1321.76	1854.07	387.682	500.68	738.635	2.25775	0.488238	1.88874	0.369017	-0.560972	1675.43	1871.45	581.724	970.301	1684.92	3.21708	1.68575	0.159625	0.947651	0.738099	-0.796177	AT3G23030.1	indole-3-acetic acid inducible 2 (IAA2); CONTAINS InterPro DOMAIN/s: Aux/IAA-ARF-dimerisation (InterPro:IPR011525), AUX/IAA protein (InterPro:IPR003311); BEST Arabidopsis thaliana protein match is: indole-3-acetic acid inducible (TAIR:AT4G14560.1); Has 2163 Blast hits to 2162 proteins in 79 species: Archae - 0; Bacteria - 0; Metazoa - 0; Fungi - 0; Plants - 2162; Viruses - 0; Other Eukaryotes - 1…
	IAA2	BnaA01g24190D	311.334	500.955	74.3831	106.098	143.318	2.75164	0.686217	2.23929	0.51235	-0.43382	423.229	475.424	110.985	155.242	377.614	4.28367	2.09885	0.167777	1.61469	0.484156	-1.28239	AT3G23030.1	indole-3-acetic acid inducible 2 (IAA2); CONTAINS InterPro DOMAIN/s: Aux/IAA-ARF-dimerisation (InterPro:IPR011525), AUX/IAA protein (InterPro:IPR003311); BEST Arabidopsis thaliana protein match is: indole-3-acetic acid inducible (TAIR:AT4G14560.1); Has 2163 Blast hits to 2162 proteins in 79 species: Archae - 0; Bacteria - 0; Metazoa - 0; Fungi - 0; Plants - 2162; Viruses - 0; Other Eukaryotes - 1…
	IAA2	BnaA03g36940D	267.006	307.747	145.415	160.112	198.128	1.08156	0.204874	0.942663	0.138902	-0.307352	231.929	211.722	143.034	130.246	199.164	1.48022	0.565809	-0.131511	0.700935	-0.135126	-0.612721	AT3G23030.1	indole-3-acetic acid inducible 2 (IAA2); CONTAINS InterPro DOMAIN/s: Aux/IAA-ARF-dimerisation (InterPro:IPR011525), AUX/IAA protein (InterPro:IPR003311); BEST Arabidopsis thaliana protein match is: indole-3-acetic acid inducible (TAIR:AT4G14560.1); Has 2163 Blast hits to 2162 proteins in 79 species: Archae - 0; Bacteria - 0; Metazoa - 0; Fungi - 0; Plants - 2162; Viruses - 0; Other Eukaryotes - 1…
	IAA2	BnaA05g16700D	376.332	597.839	157.419	172.773	261.093	1.92515	0.66775	1.79088	0.134267	-0.595689	457.91	622.641	200.754	372.321	373.139	3.10152	1.63297	0.443336	0.741853	0.891122	-0.00316732	AT3G23030.1	indole-3-acetic acid inducible 2 (IAA2); CONTAINS InterPro DOMAIN/s: Aux/IAA-ARF-dimerisation (InterPro:IPR011525), AUX/IAA protein (InterPro:IPR003311); BEST Arabidopsis thaliana protein match is: indole-3-acetic acid inducible (TAIR:AT4G14560.1); Has 2163 Blast hits to 2162 proteins in 79 species: Archae - 0; Bacteria - 0; Metazoa - 0; Fungi - 0; Plants - 2162; Viruses - 0; Other Eukaryotes - 1…
	IAA2	BnaC03g43120D	280.643	365.2	100.697	107.198	98.1458	1.85866	0.379952	1.76841	0.0902496	0.127275	297.585	291.711	160.306	136.874	85.0816	1.81971	0.86371	-0.0287602	1.0917	-0.227986	0.685925	AT3G23030.1	indole-3-acetic acid inducible 2 (IAA2); CONTAINS InterPro DOMAIN/s: Aux/IAA-ARF-dimerisation (InterPro:IPR011525), AUX/IAA protein (InterPro:IPR003311); BEST Arabidopsis thaliana protein match is: indole-3-acetic acid inducible (TAIR:AT4G14560.1); Has 2163 Blast hits to 2162 proteins in 79 species: Archae - 0; Bacteria - 0; Metazoa - 0; Fungi - 0; Plants - 2162; Viruses - 0; Other Eukaryotes - 1…
	IAA2	BnaC01g31190D	96.9022	205.504	43.1424	40.8081	63.3217	2.25199	1.08456	2.33224	-0.0802509	-0.633843	183.794	231.672	68.4807	79.8629	207.114	3.38302	1.75831	0.33399	1.53648	0.221827	-1.37483	AT3G23030.1	indole-3-acetic acid inducible 2 (IAA2); CONTAINS InterPro DOMAIN/s: Aux/IAA-ARF-dimerisation (InterPro:IPR011525), AUX/IAA protein (InterPro:IPR003311); BEST Arabidopsis thaliana protein match is: indole-3-acetic acid inducible (TAIR:AT4G14560.1); Has 2163 Blast hits to 2162 proteins in 79 species: Archae - 0; Bacteria - 0; Metazoa - 0; Fungi - 0; Plants - 2162; Viruses - 0; Other Eukaryotes - 1…
	IAA8	BnaC04g35180D	730.726	1093.82	561.002	586.302	413.619	0.963298	0.581975	0.899662	0.0636365	0.503343	679.592	930.68	432.685	716.901	394.839	2.15094	1.10497	0.453616	0.376513	0.728455	0.86051	AT2G22670.4	indoleacetic acid-induced protein 8 (IAA8); CONTAINS InterPro DOMAIN/s: Aux/IAA-ARF-dimerisation (InterPro:IPR011525), AUX/IAA protein (InterPro:IPR003311); BEST Arabidopsis thaliana protein match is: indole-3-acetic acid inducible 9 (TAIR:AT5G65670.2).
	IAA12	BnaA10g02680D	4.77778	19.5206	0	37.865	33.2791	N/A	2.03059	-0.955865	N/A	0.186247	5.00987	7.20843	0.374977	37.7164	41.0504	19.2237	4.26481	0.524911	-2.38743	6.65225	-0.122204	AT1G04550.2	indole-3-acetic acid inducible 12 (IAA12); FUNCTIONS IN: transcription repressor activity, sequence-specific DNA binding transcription factor activity; INVOLVED IN: xylem and phloem pattern formation, response to auxin stimulus, embryonic pattern specification, root development; LOCATED IN: nucleus; EXPRESSED IN: 22 plant structures; EXPRESSED DURING: 13 growth stages; CONTAINS InterPro DOMAIN/s:…
	IAA13	BnaC03g18580D	309.987	508.296	162.147	306.353	352.041	1.64837	0.713463	0.730476	0.917894	-0.200551	332.772	262.808	166.144	192.164	332.495	1.58181	0.661578	-0.340527	0.451669	0.209909	-0.790992	AT2G33310.3	auxin-induced protein 13 (IAA13); FUNCTIONS IN: sequence-specific DNA binding transcription factor activity; INVOLVED IN: response to auxin stimulus, response to cyclopentenone; LOCATED IN: nucleus; EXPRESSED IN: 22 plant structures; EXPRESSED DURING: 13 growth stages; CONTAINS InterPro DOMAIN/s: Aux/IAA-ARF-dimerisation (InterPro:IPR011525), AUX/IAA protein (InterPro:IPR003311); BEST Arabidopsis…
	IAA16	BnaC06g05090D	225.275	402.806	109.016	89.8106	175.6	1.88555	0.838402	2.16513	-0.279579	-0.967339	240.296	290.608	127.344	193.799	243.908	2.28207	1.19034	0.274264	0.584514	0.605828	-0.331779	AT1G51950.1	indole-3-acetic acid inducible 18 (IAA18); FUNCTIONS IN: sequence-specific DNA binding transcription factor activity; INVOLVED IN: response to auxin stimulus; LOCATED IN: nucleus; EXPRESSED IN: 22 plant structures; EXPRESSED DURING: 13 growth stages; CONTAINS InterPro DOMAIN/s: Aux/IAA-ARF-dimerisation (InterPro:IPR011525), AUX/IAA protein (InterPro:IPR003311); BEST Arabidopsis thaliana protein m…
	IAA16	BnaA01g33420D	189.274	215.01	52.79	164.186	153.021	2.02607	0.183926	0.389077	1.63699	0.101601	278.567	162.445	80.5847	224.496	250.43	2.01583	1.01137	-0.778075	-0.466736	1.47811	-0.157721	AT3G04730.1	indoleacetic acid-induced protein 16 (IAA16); FUNCTIONS IN: sequence-specific DNA binding transcription factor activity; INVOLVED IN: response to auxin stimulus; LOCATED IN: nucleus; EXPRESSED IN: 22 plant structures; EXPRESSED DURING: 13 growth stages; CONTAINS InterPro DOMAIN/s: Aux/IAA-ARF-dimerisation (InterPro:IPR011525), AUX/IAA protein (InterPro:IPR003311); BEST Arabidopsis thaliana protei…
	IAA26	BnaC03g39670D	617.523	868.36	229.719	268.392	473.438	1.91842	0.491801	1.69395	0.22447	-0.818834	426.376	576.526	201.375	320.7	318.345	2.86295	1.5175	0.435258	0.846162	0.671339	0.0106337	AT3G16500.1	phytochrome-associated protein 1 (PAP1); FUNCTIONS IN: sequence-specific DNA binding transcription factor activity; INVOLVED IN: response to auxin stimulus; LOCATED IN: nucleus; EXPRESSED IN: 22 plant structures; EXPRESSED DURING: 13 growth stages; CONTAINS InterPro DOMAIN/s: Aux/IAA-ARF-dimerisation (InterPro:IPR011525), AUX/IAA protein (InterPro:IPR003311); BEST Arabidopsis thaliana protein mat…
	IAA28	BnaA06g27950D	59.3338	104.194	1.99137	221.756	389.493	5.70937	0.812346	-1.0897	6.79907	-0.812627	87.5758	85.9837	7.32769	212.889	389.011	11.7341	3.55263	-0.0264685	-1.30796	4.8606	-0.869712	AT5G25890.1	indole-3-acetic acid inducible 28 (IAA28); FUNCTIONS IN: sequence-specific DNA binding transcription factor activity; INVOLVED IN: response to auxin stimulus, lateral root morphogenesis, regulation of translation; LOCATED IN: intracellular, nucleus; EXPRESSED IN: 15 plant structures; EXPRESSED DURING: 7 growth stages; CONTAINS InterPro DOMAIN/s: Aux/IAA-ARF-dimerisation (InterPro:IPR011525), AUX/…
	GH3.7	BnaA03g52610D	1.62674	12.0766	0	2.48254	0	N/A	2.89215	2.28232	N/A	N/A	0.415758	0	2.12355	1.08011	0	0	N/A	N/A	N/A	-0.9753	N/A	AT5G51470.1	Auxin-responsive GH3 family protein; CONTAINS InterPro DOMAIN/s: GH3 auxin-responsive promoter (InterPro:IPR004993); BEST Arabidopsis thaliana protein match is: Auxin-responsive GH3 family protein (TAIR:AT1G23160.1); Has 1306 Blast hits to 1254 proteins in 211 species: Archae - 0; Bacteria - 361; Metazoa - 54; Fungi - 2; Plants - 673; Viruses - 0; Other Eukaryotes - 216 (source: NCBI BLink).
	GH3.17	BnaC06g02210D	4.13873	18.8554	1.07788	1.99598	4.84485	4.12871	2.18772	3.23981	0.888904	-1.27935	22.6437	22.8109	2.38677	23.8409	33.3342	9.55725	3.2566	0.0106138	-0.0637116	3.32031	-0.483568	AT1G23160.1	Auxin-responsive GH3 family protein; CONTAINS InterPro DOMAIN/s: GH3 auxin-responsive promoter (InterPro:IPR004993); BEST Arabidopsis thaliana protein match is: Auxin-responsive GH3 family protein (TAIR:AT5G13320.1); Has 1394 Blast hits to 1308 proteins in 220 species: Archae - 0; Bacteria - 431; Metazoa - 54; Fungi - 2; Plants - 672; Viruses - 0; Other Eukaryotes - 235 (source: NCBI BLink).
	SAUR45	BnaAnng07560D	23.2581	66.2532	9.61315	11.9419	14.2992	2.78491	1.51026	2.47196	0.312951	-0.259905	64.8223	58.0331	16.8547	25.8022	26.4376	3.44313	1.78372	-0.159614	1.16938	0.614342	-0.0350972	AT2G36210.1	SAUR-like auxin-responsive protein family ; CONTAINS InterPro DOMAIN/s: Auxin responsive SAUR protein (InterPro:IPR003676); BEST Arabidopsis thaliana protein match is: SAUR-like auxin-responsive protein family (TAIR:AT4G34780.1); Has 925 Blast hits to 921 proteins in 25 species: Archae - 0; Bacteria - 0; Metazoa - 0; Fungi - 0; Plants - 924; Viruses - 0; Other Eukaryotes - 1 (source: NCBI BLink).
	SAUR52	BnaC06g36300D	58.303	35.1504	6.85745	18.35	44.1135	2.3578	-0.730028	0.937764	1.42003	-1.26544	56.5493	77.3074	11.1494	29.3155	56.5602	6.93377	2.79364	0.451099	1.39894	1.3947	-0.948122	AT1G75590.1	SAUR-like auxin-responsive protein family ; CONTAINS InterPro DOMAIN/s: Auxin responsive SAUR protein (InterPro:IPR003676); BEST Arabidopsis thaliana protein match is: SAUR-like auxin-responsive protein family (TAIR:AT5G10990.1); Has 1416 Blast hits to 1399 proteins in 25 species: Archae - 0; Bacteria - 0; Metazoa - 0; Fungi - 0; Plants - 1415; Viruses - 0; Other Eukaryotes - 1 (source: NCBI BLin…
	SAUR59	BnaC04g22040D	316.349	472.188	104.096	159.229	182.383	2.18144	0.577846	1.56826	0.613184	-0.195869	260.01	230.023	124.098	150.013	165.464	1.85356	0.890297	-0.176788	0.616695	0.273602	-0.141434	AT3G60690.1	SAUR-like auxin-responsive protein family ; CONTAINS InterPro DOMAIN/s: Auxin responsive SAUR protein (InterPro:IPR003676); BEST Arabidopsis thaliana protein match is: SAUR-like auxin-responsive protein family (TAIR:AT2G45210.1); Has 1342 Blast hits to 1328 proteins in 27 species: Archae - 0; Bacteria - 0; Metazoa - 0; Fungi - 0; Plants - 1341; Viruses - 0; Other Eukaryotes - 1 (source: NCBI BLin…
	SAUR59	BnaA04g01150D	21.4389	32.0247	1.17533	1.64705	6.16864	4.76805	0.578954	4.28123	0.486823	-1.90506	29.013	12.9922	2.04337	6.65485	5.95854	6.35822	2.66862	-1.15906	0.965166	1.70346	0.159448	AT3G60690.1	SAUR-like auxin-responsive protein family ; CONTAINS InterPro DOMAIN/s: Auxin responsive SAUR protein (InterPro:IPR003676); BEST Arabidopsis thaliana protein match is: SAUR-like auxin-responsive protein family (TAIR:AT2G45210.1); Has 1342 Blast hits to 1328 proteins in 27 species: Archae - 0; Bacteria - 0; Metazoa - 0; Fungi - 0; Plants - 1341; Viruses - 0; Other Eukaryotes - 1 (source: NCBI BLin…
Cytokinine	ARR1	BnaA05g23050D	1415.3	1892.42	813.623	703.916	1160.39	1.2178	0.419124	1.42676	-0.208958	-0.721141	1280.64	1743.91	963.944	783.106	1228.04	1.80914	0.855301	0.445454	1.15504	-0.299742	-0.649082	AT3G16857.1	response regulator 1 (RR1); CONTAINS InterPro DOMAIN/s: Response regulator, plant B-type (InterPro:IPR017053), Myb-like DNA-binding domain, SHAQKYF class (InterPro:IPR006447), CheY-like (InterPro:IPR011006), Myb, DNA-binding (InterPro:IPR014778), Homeodomain-like (InterPro:IPR009057), Signal transduction response regulator, receiver domain (InterPro:IPR001789), HTH transcriptional regulator, Myb-…
	ARR1	BnaA03g34320D	1255.98	1427.79	393.432	633.694	880.877	1.8596	0.184964	1.17192	0.687674	-0.475154	1043.16	934.349	393.272	662.876	871.79	2.37583	1.24843	-0.158925	0.495223	0.75321	-0.395242	AT3G16857.2	response regulator 1 (RR1); CONTAINS InterPro DOMAIN/s: Response regulator, plant B-type (InterPro:IPR017053), Myb-like DNA-binding domain, SHAQKYF class (InterPro:IPR006447), CheY-like (InterPro:IPR011006), Myb, DNA-binding (InterPro:IPR014778), Homeodomain-like (InterPro:IPR009057), Signal transduction response regulator, receiver domain (InterPro:IPR001789), Homeodomain-related (InterPro:IPR01…
	ARR2	BnaA03g42350D	411.209	476.288	160.426	225.474	261.804	1.56993	0.211961	1.07887	0.491059	-0.215525	403.947	420.492	102.484	287.157	351.238	4.103	2.03668	0.0579139	0.550241	1.48644	-0.29061	AT4G16110.1	response regulator 2 (RR2); CONTAINS InterPro DOMAIN/s: Response regulator, plant B-type (InterPro:IPR017053), Myb-like DNA-binding domain, SHAQKYF class (InterPro:IPR006447), CheY-like (InterPro:IPR011006), Homeodomain-like (InterPro:IPR009057), Myb, DNA-binding (InterPro:IPR014778), Signal transduction response regulator, receiver domain (InterPro:IPR001789), HTH transcriptional regulator, Myb-…
	ARR11	BnaA07g24890D	709.665	962.664	399.986	524.747	648.049	1.26708	0.439895	0.875411	0.391671	-0.30448	525.209	554.486	249.67	596.196	474.217	2.22087	1.15113	0.0782609	-0.104636	1.25576	0.330241	AT1G67710.1	response regulator 11 (ARR11); CONTAINS InterPro DOMAIN/s: Response regulator, plant B-type (InterPro:IPR017053), Myb-like DNA-binding domain, SHAQKYF class (InterPro:IPR006447), CheY-like (InterPro:IPR011006), Myb, DNA-binding (InterPro:IPR014778), Homeodomain-like (InterPro:IPR009057), Signal transduction response regulator, receiver domain (InterPro:IPR001789), Homeodomain-related (InterPro:IP…
	AHP2	BnaC07g25790D	194.468	309.843	153.758	235.387	239.834	1.01087	0.672002	0.396504	0.614371	-0.0270015	224.326	201.875	217.376	239.858	270.715	0.928691	-0.106729	-0.152135	-0.248718	0.141989	-0.174597	AT3G29350.1	histidine-containing phosphotransmitter 2 (AHP2); CONTAINS InterPro DOMAIN/s: Signal transduction histidine kinase, phosphotransfer (Hpt) domain (InterPro:IPR008207); BEST Arabidopsis thaliana protein match is: histidine-containing phosphotransmitter 3 (TAIR:AT5G39340.1); Has 369 Blast hits to 368 proteins in 74 species: Archae - 2; Bacteria - 69; Metazoa - 0; Fungi - 28; Plants - 267; Viruses - …
Brassinosteroid	BES1/BZR1	BnaC07g16480D	915.45	1373.51	573.143	584.324	774.961	1.2609	0.585309	1.23302	0.027874	-0.407354	839.577	1084.67	699.994	623.53	785.994	1.54954	0.631844	0.369523	0.798727	-0.166884	-0.33406	AT4G36780.1	BES1/BZR1 homolog 2 (BEH2); CONTAINS InterPro DOMAIN/s: BZR1, transcriptional repressor (InterPro:IPR008540); BEST Arabidopsis thaliana protein match is: BES1/BZR1 homolog 1 (TAIR:AT3G50750.1); Has 773 Blast hits to 298 proteins in 42 species: Archae - 2; Bacteria - 6; Metazoa - 9; Fungi - 12; Plants - 241; Viruses - 1; Other Eukaryotes - 502 (source: NCBI BLink).
	BZR1	BnaA07g12290D	362.85	657.116	225.997	231.768	343.804	1.53985	0.856774	1.50347	0.0363792	-0.568905	364.884	503.029	325.618	302.944	347.057	1.54484	0.627462	0.463202	0.731589	-0.104127	-0.196121	AT1G75080.2	BRASSINAZOLE-RESISTANT 1 (BZR1); CONTAINS InterPro DOMAIN/s: BZR1, transcriptional repressor (InterPro:IPR008540); BEST Arabidopsis thaliana protein match is: Brassinosteroid signalling positive regulator (BZR1) family protein (TAIR:AT1G19350.3); Has 35333 Blast hits to 34131 proteins in 2444 species: Archae - 798; Bacteria - 22429; Metazoa - 974; Fungi - 991; Plants - 531; Viruses - 0; Other Euk…
	BSK1	BnaC03g65340D	469.338	520.429	203.335	355.609	389.782	1.35585	0.149074	0.549409	0.806438	-0.132374	464.198	442.744	287.139	418.614	527.017	1.54191	0.624722	-0.0682687	0.0808503	0.543871	-0.332228	AT4G35230.1	BR-signaling kinase 1 (BSK1); FUNCTIONS IN: binding, protein kinase activity, kinase activity, ATP binding; INVOLVED IN: brassinosteroid mediated signaling pathway, N-terminal protein myristoylation; LOCATED IN: plasma membrane, vacuole, membrane; EXPRESSED IN: 24 plant structures; EXPRESSED DURING: 13 growth stages; CONTAINS InterPro DOMAIN/s: Tetratricopeptide-like helical (InterPro:IPR011990),…
	BES1/BZR1	BnaA01g01040D	1994.82	2392.86	727.107	1283.02	1793.45	1.7185	0.262476	0.899196	0.819299	-0.4832	1408.82	1382.65	896.766	1604.78	1145.27	1.54182	0.624635	-0.0270525	-0.214932	0.839567	0.486683	AT4G36780.1	BES1/BZR1 homolog 2 (BEH2); CONTAINS InterPro DOMAIN/s: BZR1, transcriptional repressor (InterPro:IPR008540); BEST Arabidopsis thaliana protein match is: BES1/BZR1 homolog 1 (TAIR:AT3G50750.1); Has 773 Blast hits to 298 proteins in 42 species: Archae - 2; Bacteria - 6; Metazoa - 9; Fungi - 12; Plants - 241; Viruses - 1; Other Eukaryotes - 502 (source: NCBI BLink).
Ethylene	ERS2	BnaC03g31730D	2722.75	4626.14	858.42	1023.03	2145.32	2.43005	0.764743	2.17696	0.25309	-1.06835	1972.02	2640.6	673.918	1353.96	1991.83	3.91829	1.97022	0.421192	0.963681	1.00654	-0.556908	AT1G04310.1	ethylene response sensor 2 (ERS2); FUNCTIONS IN: ethylene binding, protein histidine kinase activity, receptor activity, glycogen synthase kinase 3 activity; INVOLVED IN: negative regulation of ethylene mediated signaling pathway; LOCATED IN: endomembrane system, membrane; EXPRESSED IN: 22 plant structures; EXPRESSED DURING: 9 growth stages; CONTAINS InterPro DOMAIN/s: Signal transduction histidi…
	ERS2	BnaC08g00620D	206.97	160.4	54.0574	34.3969	49.6778	1.56911	-0.367751	2.22133	-0.652217	-0.530323	131.26	233.503	66.4804	50.0761	128.805	3.51235	1.81244	0.831015	2.22125	-0.408808	-1.363	AT1G04310.1	ethylene response sensor 2 (ERS2); FUNCTIONS IN: ethylene binding, protein histidine kinase activity, receptor activity, glycogen synthase kinase 3 activity; INVOLVED IN: negative regulation of ethylene mediated signaling pathway; LOCATED IN: endomembrane system, membrane; EXPRESSED IN: 22 plant structures; EXPRESSED DURING: 9 growth stages; CONTAINS InterPro DOMAIN/s: Signal transduction histidi…
	MAPK6	BnaA03g26790D	1202.39	2168.65	540.198	491.712	918.041	2.00523	0.850892	2.14091	-0.135677	-0.900746	1062.52	1218.73	388.086	452.007	874.689	3.14036	1.65093	0.197889	1.43096	0.219967	-0.952426	AT2G43790.1	MAP kinase 6 (MPK6); FUNCTIONS IN: MAP kinase activity, kinase activity; INVOLVED IN: in 20 processes; LOCATED IN: trans-Golgi network, preprophase band, phragmoplast; EXPRESSED IN: 27 plant structures; EXPRESSED DURING: 15 growth stages; CONTAINS InterPro DOMAIN/s: Protein kinase, ATP binding site (InterPro:IPR017441), JNK MAP kinase (InterPro:IPR008351), Serine/threonine-protein kinase domain (…
	EBF2	BnaC05g00620D	140.207	167.194	43.4391	64.2147	59.6677	1.94446	0.253959	1.38055	0.563911	0.105953	110.018	108.331	60.8494	104.019	50.0105	1.78031	0.832131	-0.0222889	0.0586055	0.773526	1.05654	AT5G25350.1	EIN3-binding F box protein 2 (EBF2); CONTAINS InterPro DOMAIN/s: F-box domain, cyclin-like (InterPro:IPR001810), F-box domain, Skp2-like (InterPro:IPR022364), Leucine-rich repeat, cysteine-containing subtype (InterPro:IPR006553); BEST Arabidopsis thaliana protein match is: EIN3-binding F box protein 1 (TAIR:AT2G25490.1); Has 1807 Blast hits to 1807 proteins in 277 species: Archae - 0; Bacteria - …
	ERF15	BnaC03g17400D	85.143	159.219	16.0387	110.906	127.843	3.31138	0.903056	0.521676	2.78971	-0.205028	115.759	156.225	40.8103	100.135	105.567	3.82807	1.93662	0.432501	0.641673	1.29494	-0.0762094	AT2G31230.1	ethylene-responsive element binding factor 15 (ERF15); FUNCTIONS IN: DNA binding, transcription activator activity, sequence-specific DNA binding transcription factor activity; INVOLVED IN: ethylene mediated signaling pathway, regulation of transcription, DNA-dependent, response to chitin; LOCATED IN: chloroplast; EXPRESSED IN: stem, root; CONTAINS InterPro DOMAIN/s: DNA-binding, integrase-type (…
	ERF15	BnaC04g13510D	223.376	307.266	99.0038	195.856	305.852	1.63393	0.460012	0.649693	0.98424	-0.643038	279.344	227.763	94.8414	189.399	292.025	2.40151	1.26394	-0.29451	0.266105	0.997838	-0.624667	AT2G31230.1	ethylene-responsive element binding factor 15 (ERF15); FUNCTIONS IN: DNA binding, transcription activator activity, sequence-specific DNA binding transcription factor activity; INVOLVED IN: ethylene mediated signaling pathway, regulation of transcription, DNA-dependent, response to chitin; LOCATED IN: chloroplast; EXPRESSED IN: stem, root; CONTAINS InterPro DOMAIN/s: DNA-binding, integrase-type (…
Abscisic acid	PYL7	BnaC09g04050D	664.549	778.161	184.922	172.789	347.612	2.07315	0.227694	2.17106	-0.0979093	-1.00847	410.728	477.983	269.75	192.359	406.785	1.77195	0.825337	0.218777	1.31316	-0.48782	-1.08047	AT4G01026.1	PYR1-like 7 (PYL7); CONTAINS InterPro DOMAIN/s: Polyketide cyclase/dehydrase (InterPro:IPR019587); BEST Arabidopsis thaliana protein match is: regulatory component of ABA receptor 1 (TAIR:AT1G01360.1); Has 397 Blast hits to 397 proteins in 30 species: Archae - 0; Bacteria - 5; Metazoa - 2; Fungi - 0; Plants - 390; Viruses - 0; Other Eukaryotes - 0 (source: NCBI BLink).
	RCAR1	BnaA09g04600D	1049.51	1341.25	184.585	156.189	244.631	2.86122	0.353861	3.10221	-0.24099	-0.647313	610.932	947.686	323.865	150.797	218.26	2.92618	1.54902	0.633397	2.6518	-1.10279	-0.533443	AT1G01360.1	regulatory component of ABA receptor 1 (RCAR1); CONTAINS InterPro DOMAIN/s: Polyketide cyclase/dehydrase (InterPro:IPR019587); BEST Arabidopsis thaliana protein match is: PYR1-like 7 (TAIR:AT4G01026.1); Has 395 Blast hits to 395 proteins in 28 species: Archae - 0; Bacteria - 3; Metazoa - 0; Fungi - 0; Plants - 392; Viruses - 0; Other Eukaryotes - 0 (source: NCBI BLink).
	PYL1	BnaC09g19620D	513.211	540.047	236.364	251.76	421.606	1.19208	0.0735332	1.10103	0.0910437	-0.743844	393.709	525.556	191.593	330.565	335.436	2.74309	1.4558	0.416715	0.668913	0.786887	-0.0211034	AT5G46790.1	PYR1-like 1 (PYL1); CONTAINS InterPro DOMAIN/s: Polyketide cyclase/dehydrase (InterPro:IPR019587); BEST Arabidopsis thaliana protein match is: Polyketide cyclase/dehydrase and lipid transport superfamily protein (TAIR:AT4G17870.1); Has 30201 Blast hits to 17322 proteins in 780 species: Archae - 12; Bacteria - 1396; Metazoa - 17338; Fungi - 3422; Plants - 5037; Viruses - 0; Other Eukaryotes - 2996…
	PYR1	BnaC07g34880D	1870.8	2367.5	1125.63	1398.64	2067.11	1.07264	0.339715	0.759343	0.313297	-0.56359	1262.94	1513.9	1039.85	1505.39	1547.56	1.45589	0.541898	0.261478	0.00813573	0.533762	-0.0398593	AT4G17870.1	PYRABACTIN RESISTANCE 1 (PYR1); FUNCTIONS IN: abscisic acid binding; INVOLVED IN: abscisic acid mediated signaling pathway, regulation of protein phosphatase type 2c activity; LOCATED IN: cellular_component unknown; EXPRESSED IN: 25 plant structures; EXPRESSED DURING: 15 growth stages; CONTAINS InterPro DOMAIN/s: Streptomyces cyclase/dehydrase (InterPro:IPR005031); BEST Arabidopsis thaliana prote…
	RCAR1	BnaA10g00540D	153.758	290.215	107.602	209.758	192.709	1.43141	0.916467	0.4684	0.963015	0.122304	152.429	142.59	126.189	236.768	98.0886	1.12997	0.176283	-0.0962659	-0.731599	0.907883	1.27132	AT1G01360.1	regulatory component of ABA receptor 1 (RCAR1); CONTAINS InterPro DOMAIN/s: Polyketide cyclase/dehydrase (InterPro:IPR019587); BEST Arabidopsis thaliana protein match is: PYR1-like 7 (TAIR:AT4G01026.1); Has 395 Blast hits to 395 proteins in 28 species: Archae - 0; Bacteria - 3; Metazoa - 0; Fungi - 0; Plants - 392; Viruses - 0; Other Eukaryotes - 0 (source: NCBI BLink).
	ABI5	BnaA05g08020D	230.07	276.913	136.594	181.881	162.592	1.01954	0.267363	0.606439	0.413105	0.161736	212.769	557.027	128.088	255.869	815.284	4.34878	2.12061	1.38846	1.12234	0.99827	-1.67189	AT2G36270.1	ABA INSENSITIVE 5 (ABI5); CONTAINS InterPro DOMAIN/s: Basic-leucine zipper (bZIP) transcription factor (InterPro:IPR004827), bZIP transcription factor, bZIP-1 (InterPro:IPR011616); BEST Arabidopsis thaliana protein match is: abscisic acid responsive element-binding factor 1 (TAIR:AT1G49720.1); Has 3780 Blast hits to 3404 proteins in 335 species: Archae - 4; Bacteria - 363; Metazoa - 820; Fungi - …
	ABF3	BnaC07g44670D	271.643	429.111	188.396	278.843	355.288	1.18758	0.65964	0.621894	0.565687	-0.349532	263.234	302.718	213.443	430.62	318.696	1.41826	0.504124	0.201629	-0.508439	1.01256	0.434235	AT4G34000.2	abscisic acid responsive elements-binding factor 3 (ABF3); FUNCTIONS IN: protein binding, DNA binding, transcription activator activity, sequence-specific DNA binding transcription factor activity; INVOLVED IN: in 6 processes; EXPRESSED IN: 23 plant structures; EXPRESSED DURING: 12 growth stages; CONTAINS InterPro DOMAIN/s: Basic-leucine zipper (bZIP) transcription factor (InterPro:IPR004827), bZ…
	SNRK2-6	BnaC01g04370D	18.4873	30.5076	5.00747	20.9611	5.02805	2.60701	0.722635	0.541453	2.06556	2.05965	30.6425	23.1381	2.51958	8.07504	3.73478	9.1833	3.19901	-0.405266	1.51873	1.68029	1.11245	AT4G33950.1	OPEN STOMATA 1 (OST1); FUNCTIONS IN: calcium-dependent protein serine/threonine kinase activity, protein kinase activity, kinase activity; INVOLVED IN: in 14 processes; LOCATED IN: cytosol, nucleus, cytoplasm; EXPRESSED IN: 25 plant structures; EXPRESSED DURING: 14 growth stages; CONTAINS InterPro DOMAIN/s: Protein kinase, ATP binding site (InterPro:IPR017441), Serine/threonine-protein kinase dom…
	SNRK2.2	BnaC07g31800D	439.563	563.757	227.736	345.514	420.396	1.30771	0.359004	0.706328	0.601381	-0.283004	365.715	425.009	299.699	371.125	366.849	1.41812	0.503976	0.216772	0.195589	0.308388	0.0167162	AT3G50500.1	SNF1-related protein kinase 2.2 (SNRK2.2); FUNCTIONS IN: protein kinase activity, kinase activity; INVOLVED IN: in 7 processes; LOCATED IN: cytosol, nucleus, cytoplasm; EXPRESSED IN: 25 plant structures; EXPRESSED DURING: 15 growth stages; CONTAINS InterPro DOMAIN/s: Protein kinase, ATP binding site (InterPro:IPR017441), Serine/threonine-protein kinase domain (InterPro:IPR002290), Serine/threonin…
